# Supplementary material for: Gene-Trait Matching and Prevalence of Nisin Tolerance Systems in Lactococus lactis
Source: Front Bioeng Biotechnol. 2021 Mar 3;9:622835. doi: 10.3389/fbioe.2021.622835 (PMC7965974; doi:10.3389/fbioe.2021.622835)
Supplement: Supplementary Table 5 — Separate milk acidification profiles for all 710 L. lactis strains in the presence and absence of nisin. [file Data_Sheet_1.ZIP]

Archive with 1 entries (1 files):
- Supplementary_Table_5_Oct20.txt
