# Supplementary material for: Gene-Trait Matching and Prevalence of Nisin Tolerance Systems in Lactococus lactis
Source: Front Bioeng Biotechnol. 2021 Mar 3;9:622835. doi: 10.3389/fbioe.2021.622835 (PMC7965974; doi:10.3389/fbioe.2021.622835)
Supplement: Supplementary Table 5 — Separate milk acidification profiles for all 710 L. lactis strains in the presence and absence of nisin. [file Data_Sheet_1.ZIP › Supplementary_Table_5_Oct20.txt]

CH_ID	Genotype	Genus	Species	Subspecies	mlst	phenotype	dpH1	dpH2	AUC1	AUC2	dAUC	ctr_acid_start	nisin_acid_start	dif_start	NisinA_levels	NSR_level	NSR_type	NSR	NisA	NisB	NisT	NisC	NisI	NisP	NisRK	NisFEG	min_pH1	min_pH2	rep	time	pH	sync_time	sync_pH	res_pH
Lcl-036	nsr- nis-	Lactococcus	lactis	cremoris	61	LA	1.98	0.82	8.209	15.971	7.76	4.69433333333333	11.2886666666667	6.9	1.09727377392506			0	0	0	0	0	0	0	0	0	4.35	5.62	A	0.188333333333333	6.41012459136771	-4.20033333333333	6.36523632868897	0.982430179958793
Lcl-036	nsr- nis-	Lactococcus	lactis	cremoris	61	LA	1.98	0.82	8.209	15.971	7.76	4.69433333333333	11.2886666666667	6.9	1.09727377392506			0	0	0	0	0	0	0	0	0	4.35	5.62	A	0.188333333333333	6.32790531999394	-4.20033333333333	6.4	1
Lcl-036	nsr- nis-	Lactococcus	lactis	cremoris	61	LA	1.98	0.82	8.209	15.971	7.76	4.69433333333333	11.2886666666667	6.9	1.09727377392506			0	0	0	0	0	0	0	0	0	4.35	5.62	A	0.288333333333333	6.41362685543325	-4.10033333333333	6.3687385927545	0.984200250467679
Lcl-036	nsr- nis-	Lactococcus	lactis	cremoris	61	LA	1.98	0.82	8.209	15.971	7.76	4.69433333333333	11.2886666666667	6.9	1.09727377392506			0	0	0	0	0	0	0	0	0	4.35	5.62	A	0.288333333333333	6.3252406165568	-4.10033333333333	6.39733529656286	0.998653238910391
Lcl-036	nsr- nis-	Lactococcus	lactis	cremoris	61	LA	1.98	0.82	8.209	15.971	7.76	4.69433333333333	11.2886666666667	6.9	1.09727377392506			0	0	0	0	0	0	0	0	0	4.35	5.62	A	0.388333333333333	6.40931372194971	-4.00033333333333	6.36442545927097	0.98202036047731
Lcl-036	nsr- nis-	Lactococcus	lactis	cremoris	61	LA	1.98	0.82	8.209	15.971	7.76	4.69433333333333	11.2886666666667	6.9	1.09727377392506			0	0	0	0	0	0	0	0	0	4.35	5.62	A	0.388333333333333	6.3225597541167	-4.00033333333333	6.39465443412276	0.997298310939568
Lcl-036	nsr- nis-	Lactococcus	lactis	cremoris	61	LA	1.98	0.82	8.209	15.971	7.76	4.69433333333333	11.2886666666667	6.9	1.09727377392506			0	0	0	0	0	0	0	0	0	4.35	5.62	A	0.488833333333333	6.41470485627899	-3.89983333333333	6.36981659360024	0.984745080174945
Lcl-036	nsr- nis-	Lactococcus	lactis	cremoris	61	LA	1.98	0.82	8.209	15.971	7.76	4.69433333333333	11.2886666666667	6.9	1.09727377392506			0	0	0	0	0	0	0	0	0	4.35	5.62	A	0.488833333333333	6.31322372701665	-3.89983333333333	6.38531840702271	0.992579812867827
Lcl-036	nsr- nis-	Lactococcus	lactis	cremoris	61	LA	1.98	0.82	8.209	15.971	7.76	4.69433333333333	11.2886666666667	6.9	1.09727377392506			0	0	0	0	0	0	0	0	0	4.35	5.62	A	0.588833333333333	6.41793986197424	-3.79983333333333	6.3730515992955	0.986380076300337
Lcl-036	nsr- nis-	Lactococcus	lactis	cremoris	61	LA	1.98	0.82	8.209	15.971	7.76	4.69433333333333	11.2886666666667	6.9	1.09727377392506			0	0	0	0	0	0	0	0	0	4.35	5.62	A	0.588833333333333	6.3038876999166	-3.79983333333333	6.37598237992266	0.987861314796087
Lcl-036	nsr- nis-	Lactococcus	lactis	cremoris	61	LA	1.98	0.82	8.209	15.971	7.76	4.69433333333333	11.2886666666667	6.9	1.09727377392506			0	0	0	0	0	0	0	0	0	4.35	5.62	A	0.688666666666667	6.41793986197424	-3.7	6.3730515992955	0.986380076300337
Lcl-036	nsr- nis-	Lactococcus	lactis	cremoris	61	LA	1.98	0.82	8.209	15.971	7.76	4.69433333333333	11.2886666666667	6.9	1.09727377392506			0	0	0	0	0	0	0	0	0	4.35	5.62	A	0.688666666666667	6.31377794740014	-3.7	6.3858726274062	0.992859920003636
Lcl-036	nsr- nis-	Lactococcus	lactis	cremoris	61	LA	1.98	0.82	8.209	15.971	7.76	4.69433333333333	11.2886666666667	6.9	1.09727377392506			0	0	0	0	0	0	0	0	0	4.35	5.62	A	0.788333333333333	6.42548741993414	-3.60033333333333	6.38059915725539	0.990194668663712
Lcl-036	nsr- nis-	Lactococcus	lactis	cremoris	61	LA	1.98	0.82	8.209	15.971	7.76	4.69433333333333	11.2886666666667	6.9	1.09727377392506			0	0	0	0	0	0	0	0	0	4.35	5.62	A	0.788333333333333	6.31857916045229	-3.60033333333333	6.39067384045835	0.995286489066235
Lcl-036	nsr- nis-	Lactococcus	lactis	cremoris	61	LA	1.98	0.82	8.209	15.971	7.76	4.69433333333333	11.2886666666667	6.9	1.09727377392506			0	0	0	0	0	0	0	0	0	4.35	5.62	A	0.888333333333333	6.42575693948035	-3.50033333333333	6.38086867680161	0.990330885862472
Lcl-036	nsr- nis-	Lactococcus	lactis	cremoris	61	LA	1.98	0.82	8.209	15.971	7.76	4.69433333333333	11.2886666666667	6.9	1.09727377392506			0	0	0	0	0	0	0	0	0	4.35	5.62	A	0.888333333333333	6.31857916045229	-3.50033333333333	6.39067384045835	0.995286489066235
Lcl-036	nsr- nis-	Lactococcus	lactis	cremoris	61	LA	1.98	0.82	8.209	15.971	7.76	4.69433333333333	11.2886666666667	6.9	1.09727377392506			0	0	0	0	0	0	0	0	0	4.35	5.62	A	0.988333333333333	6.42575693948035	-3.40033333333333	6.38086867680161	0.990330885862472
Lcl-036	nsr- nis-	Lactococcus	lactis	cremoris	61	LA	1.98	0.82	8.209	15.971	7.76	4.69433333333333	11.2886666666667	6.9	1.09727377392506			0	0	0	0	0	0	0	0	0	4.35	5.62	A	0.988333333333333	6.32097196058833	-3.40033333333333	6.39306664059439	0.996495828189502
Lcl-036	nsr- nis-	Lactococcus	lactis	cremoris	61	LA	1.98	0.82	8.209	15.971	7.76	4.69433333333333	11.2886666666667	6.9	1.09727377392506			0	0	0	0	0	0	0	0	0	4.35	5.62	A	1.08833333333333	6.42063502970069	-3.30033333333333	6.37574676702195	0.987742234270101
Lcl-036	nsr- nis-	Lactococcus	lactis	cremoris	61	LA	1.98	0.82	8.209	15.971	7.76	4.69433333333333	11.2886666666667	6.9	1.09727377392506			0	0	0	0	0	0	0	0	0	4.35	5.62	A	1.08833333333333	6.32336476072437	-3.30033333333333	6.39545944073043	0.997705167312769
Lcl-036	nsr- nis-	Lactococcus	lactis	cremoris	61	LA	1.98	0.82	8.209	15.971	7.76	4.69433333333333	11.2886666666667	6.9	1.09727377392506			0	0	0	0	0	0	0	0	0	4.35	5.62	A	1.18866666666667	6.42602616402996	-3.2	6.38113790135122	0.990466953967736
Lcl-036	nsr- nis-	Lactococcus	lactis	cremoris	61	LA	1.98	0.82	8.209	15.971	7.76	4.69433333333333	11.2886666666667	6.9	1.09727377392506			0	0	0	0	0	0	0	0	0	4.35	5.62	A	1.18866666666667	6.31827572629298	-3.2	6.39037040629904	0.99513313116782
Lcl-036	nsr- nis-	Lactococcus	lactis	cremoris	61	LA	1.98	0.82	8.209	15.971	7.76	4.69433333333333	11.2886666666667	6.9	1.09727377392506			0	0	0	0	0	0	0	0	0	4.35	5.62	A	1.28833333333333	6.42602616402996	-3.10033333333333	6.38113790135122	0.990466953967736
Lcl-036	nsr- nis-	Lactococcus	lactis	cremoris	61	LA	1.98	0.82	8.209	15.971	7.76	4.69433333333333	11.2886666666667	6.9	1.09727377392506			0	0	0	0	0	0	0	0	0	4.35	5.62	A	1.28833333333333	6.31134787118422	-3.10033333333333	6.38344255119028	0.991631741270206
Lcl-036	nsr- nis-	Lactococcus	lactis	cremoris	61	LA	1.98	0.82	8.209	15.971	7.76	4.69433333333333	11.2886666666667	6.9	1.09727377392506			0	0	0	0	0	0	0	0	0	4.35	5.62	A	1.38833333333333	6.43330420244364	-3.00033333333333	6.3884159397649	0.99414532913235
Lcl-036	nsr- nis-	Lactococcus	lactis	cremoris	61	LA	1.98	0.82	8.209	15.971	7.76	4.69433333333333	11.2886666666667	6.9	1.09727377392506			0	0	0	0	0	0	0	0	0	4.35	5.62	A	1.38833333333333	6.30440464422021	-3.00033333333333	6.37649932422627	0.988122582321733
Lcl-036	nsr- nis-	Lactococcus	lactis	cremoris	61	LA	1.98	0.82	8.209	15.971	7.76	4.69433333333333	11.2886666666667	6.9	1.09727377392506			0	0	0	0	0	0	0	0	0	4.35	5.62	A	1.48833333333333	6.43141763004188	-2.90033333333333	6.38652936736314	0.993191841300266
Lcl-036	nsr- nis-	Lactococcus	lactis	cremoris	61	LA	1.98	0.82	8.209	15.971	7.76	4.69433333333333	11.2886666666667	6.9	1.09727377392506			0	0	0	0	0	0	0	0	0	4.35	5.62	A	1.48833333333333	6.30201184408417	-2.90033333333333	6.37410652409023	0.986913243198466
Lcl-036	nsr- nis-	Lactococcus	lactis	cremoris	61	LA	1.98	0.82	8.209	15.971	7.76	4.69433333333333	11.2886666666667	6.9	1.09727377392506			0	0	0	0	0	0	0	0	0	4.35	5.62	A	1.58866666666667	6.43869566845556	-2.8	6.39380740577682	0.996870216464881
Lcl-036	nsr- nis-	Lactococcus	lactis	cremoris	61	LA	1.98	0.82	8.209	15.971	7.76	4.69433333333333	11.2886666666667	6.9	1.09727377392506			0	0	0	0	0	0	0	0	0	4.35	5.62	A	1.58866666666667	6.29961904394813	-2.8	6.37171372395419	0.985703904075199
Lcl-036	nsr- nis-	Lactococcus	lactis	cremoris	61	LA	1.98	0.82	8.209	15.971	7.76	4.69433333333333	11.2886666666667	6.9	1.09727377392506			0	0	0	0	0	0	0	0	0	4.35	5.62	A	1.68883333333333	6.4368090960538	-2.69983333333333	6.39192083337505	0.995916728632796
Lcl-036	nsr- nis-	Lactococcus	lactis	cremoris	61	LA	1.98	0.82	8.209	15.971	7.76	4.69433333333333	11.2886666666667	6.9	1.09727377392506			0	0	0	0	0	0	0	0	0	4.35	5.62	A	1.68883333333333	6.29508398897541	-2.69983333333333	6.36717866898148	0.983411853300853
Lcl-036	nsr- nis-	Lactococcus	lactis	cremoris	61	LA	1.98	0.82	8.209	15.971	7.76	4.69433333333333	11.2886666666667	6.9	1.09727377392506			0	0	0	0	0	0	0	0	0	4.35	5.62	A	1.78833333333333	6.43492252365204	-2.60033333333333	6.39003426097329	0.994963240800711
Lcl-036	nsr- nis-	Lactococcus	lactis	cremoris	61	LA	1.98	0.82	8.209	15.971	7.76	4.69433333333333	11.2886666666667	6.9	1.09727377392506			0	0	0	0	0	0	0	0	0	4.35	5.62	A	1.78833333333333	6.29508398897541	-2.60033333333333	6.36717866898148	0.983411853300853
Lcl-036	nsr- nis-	Lactococcus	lactis	cremoris	61	LA	1.98	0.82	8.209	15.971	7.76	4.69433333333333	11.2886666666667	6.9	1.09727377392506			0	0	0	0	0	0	0	0	0	4.35	5.62	A	1.88866666666667	6.43303595125028	-2.5	6.38814768857153	0.994009752968627
Lcl-036	nsr- nis-	Lactococcus	lactis	cremoris	61	LA	1.98	0.82	8.209	15.971	7.76	4.69433333333333	11.2886666666667	6.9	1.09727377392506			0	0	0	0	0	0	0	0	0	4.35	5.62	A	1.88866666666667	6.29269118883937	-2.5	6.36478586884543	0.982202514177586
Lcl-036	nsr- nis-	Lactococcus	lactis	cremoris	61	LA	1.98	0.82	8.209	15.971	7.76	4.69433333333333	11.2886666666667	6.9	1.09727377392506			0	0	0	0	0	0	0	0	0	4.35	5.62	A	1.98833333333333	6.43303595125028	-2.40033333333333	6.38814768857153	0.994009752968627
Lcl-036	nsr- nis-	Lactococcus	lactis	cremoris	61	LA	1.98	0.82	8.209	15.971	7.76	4.69433333333333	11.2886666666667	6.9	1.09727377392506			0	0	0	0	0	0	0	0	0	4.35	5.62	A	1.98833333333333	6.29269118883937	-2.40033333333333	6.36478586884543	0.982202514177586
Lcl-036	nsr- nis-	Lactococcus	lactis	cremoris	61	LA	1.98	0.82	8.209	15.971	7.76	4.69433333333333	11.2886666666667	6.9	1.09727377392506			0	0	0	0	0	0	0	0	0	4.35	5.62	A	2.08866666666667	6.43114937884851	-2.3	6.38626111616977	0.993056265136542
Lcl-036	nsr- nis-	Lactococcus	lactis	cremoris	61	LA	1.98	0.82	8.209	15.971	7.76	4.69433333333333	11.2886666666667	6.9	1.09727377392506			0	0	0	0	0	0	0	0	0	4.35	5.62	A	2.08866666666667	6.29269118883937	-2.3	6.36478586884543	0.982202514177586
Lcl-036	nsr- nis-	Lactococcus	lactis	cremoris	61	LA	1.98	0.82	8.209	15.971	7.76	4.69433333333333	11.2886666666667	6.9	1.09727377392506			0	0	0	0	0	0	0	0	0	4.35	5.62	A	2.18833333333333	6.4257579128366	-2.20033333333333	6.38086965015785	0.990331377804012
Lcl-036	nsr- nis-	Lactococcus	lactis	cremoris	61	LA	1.98	0.82	8.209	15.971	7.76	4.69433333333333	11.2886666666667	6.9	1.09727377392506			0	0	0	0	0	0	0	0	0	4.35	5.62	A	2.18833333333333	6.29029838870333	-2.20033333333333	6.36239306870939	0.980993175054319
Lcl-036	nsr- nis-	Lactococcus	lactis	cremoris	61	LA	1.98	0.82	8.209	15.971	7.76	4.69433333333333	11.2886666666667	6.9	1.09727377392506			0	0	0	0	0	0	0	0	0	4.35	5.62	A	2.28833333333333	6.42036644682468	-2.10033333333333	6.37547818414593	0.987606490471482
Lcl-036	nsr- nis-	Lactococcus	lactis	cremoris	61	LA	1.98	0.82	8.209	15.971	7.76	4.69433333333333	11.2886666666667	6.9	1.09727377392506			0	0	0	0	0	0	0	0	0	4.35	5.62	A	2.28833333333333	6.29029838870333	-2.10033333333333	6.36239306870939	0.980993175054319
Lcl-036	nsr- nis-	Lactococcus	lactis	cremoris	61	LA	1.98	0.82	8.209	15.971	7.76	4.69433333333333	11.2886666666667	6.9	1.09727377392506			0	0	0	0	0	0	0	0	0	4.35	5.62	A	2.38866666666667	6.41497498081276	-2	6.37008671813402	0.984881603138952
Lcl-036	nsr- nis-	Lactococcus	lactis	cremoris	61	LA	1.98	0.82	8.209	15.971	7.76	4.69433333333333	11.2886666666667	6.9	1.09727377392506			0	0	0	0	0	0	0	0	0	4.35	5.62	A	2.38866666666667	6.29029838870333	-2	6.36239306870939	0.980993175054319
Lcl-036	nsr- nis-	Lactococcus	lactis	cremoris	61	LA	1.98	0.82	8.209	15.971	7.76	4.69433333333333	11.2886666666667	6.9	1.09727377392506			0	0	0	0	0	0	0	0	0	4.35	5.62	A	2.48833333333333	6.40958351480084	-1.90033333333333	6.3646952521221	0.982156715806422
Lcl-036	nsr- nis-	Lactococcus	lactis	cremoris	61	LA	1.98	0.82	8.209	15.971	7.76	4.69433333333333	11.2886666666667	6.9	1.09727377392506			0	0	0	0	0	0	0	0	0	4.35	5.62	A	2.48833333333333	6.29269118883937	-1.90033333333333	6.36478586884543	0.982202514177586
Lcl-036	nsr- nis-	Lactococcus	lactis	cremoris	61	LA	1.98	0.82	8.209	15.971	7.76	4.69433333333333	11.2886666666667	6.9	1.09727377392506			0	0	0	0	0	0	0	0	0	4.35	5.62	A	2.58866666666667	6.40958351480084	-1.8	6.3646952521221	0.982156715806422
Lcl-036	nsr- nis-	Lactococcus	lactis	cremoris	61	LA	1.98	0.82	8.209	15.971	7.76	4.69433333333333	11.2886666666667	6.9	1.09727377392506			0	0	0	0	0	0	0	0	0	4.35	5.62	A	2.58866666666667	6.29269118883937	-1.8	6.36478586884543	0.982202514177586
Lcl-036	nsr- nis-	Lactococcus	lactis	cremoris	61	LA	1.98	0.82	8.209	15.971	7.76	4.69433333333333	11.2886666666667	6.9	1.09727377392506			0	0	0	0	0	0	0	0	0	4.35	5.62	A	2.68833333333333	6.41713100431588	-1.70033333333333	6.37224274163713	0.985971273577252
Lcl-036	nsr- nis-	Lactococcus	lactis	cremoris	61	LA	1.98	0.82	8.209	15.971	7.76	4.69433333333333	11.2886666666667	6.9	1.09727377392506			0	0	0	0	0	0	0	0	0	4.35	5.62	A	2.68833333333333	6.29269118883937	-1.70033333333333	6.36478586884543	0.982202514177586
Lcl-036	nsr- nis-	Lactococcus	lactis	cremoris	61	LA	1.98	0.82	8.209	15.971	7.76	4.69433333333333	11.2886666666667	6.9	1.09727377392506			0	0	0	0	0	0	0	0	0	4.35	5.62	A	2.78833333333333	6.41713100431588	-1.60033333333333	6.37224274163713	0.985971273577252
Lcl-036	nsr- nis-	Lactococcus	lactis	cremoris	61	LA	1.98	0.82	8.209	15.971	7.76	4.69433333333333	11.2886666666667	6.9	1.09727377392506			0	0	0	0	0	0	0	0	0	4.35	5.62	A	2.78833333333333	6.28528785509213	-1.60033333333333	6.35738253509819	0.978460813812276
Lcl-036	nsr- nis-	Lactococcus	lactis	cremoris	61	LA	1.98	0.82	8.209	15.971	7.76	4.69433333333333	11.2886666666667	6.9	1.09727377392506			0	0	0	0	0	0	0	0	0	4.35	5.62	A	2.88833333333333	6.41713100431588	-1.50033333333333	6.37224274163713	0.985971273577252
Lcl-036	nsr- nis-	Lactococcus	lactis	cremoris	61	LA	1.98	0.82	8.209	15.971	7.76	4.69433333333333	11.2886666666667	6.9	1.09727377392506			0	0	0	0	0	0	0	0	0	4.35	5.62	A	2.88833333333333	6.28768065522817	-1.50033333333333	6.35977533523423	0.979670152935543
Lcl-036	nsr- nis-	Lactococcus	lactis	cremoris	61	LA	1.98	0.82	8.209	15.971	7.76	4.69433333333333	11.2886666666667	6.9	1.09727377392506			0	0	0	0	0	0	0	0	0	4.35	5.62	A	2.98866666666667	6.42467849383092	-1.4	6.37979023115217	0.989785831348082
Lcl-036	nsr- nis-	Lactococcus	lactis	cremoris	61	LA	1.98	0.82	8.209	15.971	7.76	4.69433333333333	11.2886666666667	6.9	1.09727377392506			0	0	0	0	0	0	0	0	0	4.35	5.62	A	2.98866666666667	6.27788452134489	-1.4	6.34997920135095	0.974719113446967
Lcl-036	nsr- nis-	Lactococcus	lactis	cremoris	61	LA	1.98	0.82	8.209	15.971	7.76	4.69433333333333	11.2886666666667	6.9	1.09727377392506			0	0	0	0	0	0	0	0	0	4.35	5.62	A	3.08866666666667	6.42683451733403	-1.3	6.38194625465529	0.990875501786382
Lcl-036	nsr- nis-	Lactococcus	lactis	cremoris	61	LA	1.98	0.82	8.209	15.971	7.76	4.69433333333333	11.2886666666667	6.9	1.09727377392506			0	0	0	0	0	0	0	0	0	4.35	5.62	A	3.08866666666667	6.26106535399164	-1.3	6.3331600339977	0.966218580203638
Lcl-036	nsr- nis-	Lactococcus	lactis	cremoris	61	LA	1.98	0.82	8.209	15.971	7.76	4.69433333333333	11.2886666666667	6.9	1.09727377392506			0	0	0	0	0	0	0	0	0	4.35	5.62	A	3.18833333333333	6.419287027819	-1.20033333333333	6.37439876514025	0.987060944015552
Lcl-036	nsr- nis-	Lactococcus	lactis	cremoris	61	LA	1.98	0.82	8.209	15.971	7.76	4.69433333333333	11.2886666666667	6.9	1.09727377392506			0	0	0	0	0	0	0	0	0	4.35	5.62	A	3.18833333333333	6.25603452536272	-1.20033333333333	6.32812920536878	0.963675961707523
Lcl-036	nsr- nis-	Lactococcus	lactis	cremoris	61	LA	1.98	0.82	8.209	15.971	7.76	4.69433333333333	11.2886666666667	6.9	1.09727377392506			0	0	0	0	0	0	0	0	0	4.35	5.62	A	3.28833333333333	6.43194930715179	-1.10033333333333	6.38706104447305	0.99346055489664
Lcl-036	nsr- nis-	Lactococcus	lactis	cremoris	61	LA	1.98	0.82	8.209	15.971	7.76	4.69433333333333	11.2886666666667	6.9	1.09727377392506			0	0	0	0	0	0	0	0	0	4.35	5.62	A	3.28833333333333	6.25840703048104	-1.10033333333333	6.3305017104871	0.964875043576718
Lcl-036	nsr- nis-	Lactococcus	lactis	cremoris	61	LA	1.98	0.82	8.209	15.971	7.76	4.69433333333333	11.2886666666667	6.9	1.09727377392506			0	0	0	0	0	0	0	0	0	4.35	5.62	A	3.38833333333333	6.43949679666683	-1.00033333333333	6.39460853398808	0.99727511266747
Lcl-036	nsr- nis-	Lactococcus	lactis	cremoris	61	LA	1.98	0.82	8.209	15.971	7.76	4.69433333333333	11.2886666666667	6.9	1.09727377392506			0	0	0	0	0	0	0	0	0	4.35	5.62	A	3.38833333333333	6.23919506299174	-1.00033333333333	6.3112897429978	0.955165171210122
Lcl-036	nsr- nis-	Lactococcus	lactis	cremoris	61	LA	1.98	0.82	8.209	15.971	7.76	4.69433333333333	11.2886666666667	6.9	1.09727377392506			0	0	0	0	0	0	0	0	0	4.35	5.62	A	3.48833333333333	6.43949679666683	-0.900333333333333	6.39460853398808	0.99727511266747
Lcl-036	nsr- nis-	Lactococcus	lactis	cremoris	61	LA	1.98	0.82	8.209	15.971	7.76	4.69433333333333	11.2886666666667	6.9	1.09727377392506			0	0	0	0	0	0	0	0	0	4.35	5.62	A	3.48833333333333	6.22977922938573	-0.900333333333333	6.30187390939179	0.950406338332102
Lcl-036	nsr- nis-	Lactococcus	lactis	cremoris	61	LA	1.98	0.82	8.209	15.971	7.76	4.69433333333333	11.2886666666667	6.9	1.09727377392506			0	0	0	0	0	0	0	0	0	4.35	5.62	A	3.58833333333333	6.43949679666683	-0.800333333333333	6.39460853398808	0.99727511266747
Lcl-036	nsr- nis-	Lactococcus	lactis	cremoris	61	LA	1.98	0.82	8.209	15.971	7.76	4.69433333333333	11.2886666666667	6.9	1.09727377392506			0	0	0	0	0	0	0	0	0	4.35	5.62	A	3.58833333333333	6.22977922938573	-0.800333333333333	6.30187390939179	0.950406338332102
Lcl-036	nsr- nis-	Lactococcus	lactis	cremoris	61	LA	1.98	0.82	8.209	15.971	7.76	4.69433333333333	11.2886666666667	6.9	1.09727377392506			0	0	0	0	0	0	0	0	0	4.35	5.62	A	3.68833333333333	6.44488826267875	-0.700333333333333	6.4	1
Lcl-036	nsr- nis-	Lactococcus	lactis	cremoris	61	LA	1.98	0.82	8.209	15.971	7.76	4.69433333333333	11.2886666666667	6.9	1.09727377392506			0	0	0	0	0	0	0	0	0	4.35	5.62	A	3.68833333333333	6.21229896936356	-0.700333333333333	6.28439364936963	0.941571683898885
Lcl-036	nsr- nis-	Lactococcus	lactis	cremoris	61	LA	1.98	0.82	8.209	15.971	7.76	4.69433333333333	11.2886666666667	6.9	1.09727377392506			0	0	0	0	0	0	0	0	0	4.35	5.62	A	3.78833333333333	6.43977347286099	-0.600333333333333	6.39488521018224	0.997414946889742
Lcl-036	nsr- nis-	Lactococcus	lactis	cremoris	61	LA	1.98	0.82	8.209	15.971	7.76	4.69433333333333	11.2886666666667	6.9	1.09727377392506			0	0	0	0	0	0	0	0	0	4.35	5.62	A	3.78833333333333	6.21229896936356	-0.600333333333333	6.28439364936963	0.941571683898885
Lcl-036	nsr- nis-	Lactococcus	lactis	cremoris	61	LA	1.98	0.82	8.209	15.971	7.76	4.69433333333333	11.2886666666667	6.9	1.09727377392506			0	0	0	0	0	0	0	0	0	4.35	5.62	A	3.88833333333333	6.43977347286099	-0.500333333333333	6.39488521018224	0.997414946889742
Lcl-036	nsr- nis-	Lactococcus	lactis	cremoris	61	LA	1.98	0.82	8.209	15.971	7.76	4.69433333333333	11.2886666666667	6.9	1.09727377392506			0	0	0	0	0	0	0	0	0	4.35	5.62	A	3.88833333333333	6.21438069811619	-0.500333333333333	6.28647537812225	0.94262380521343
Lcl-036	nsr- nis-	Lactococcus	lactis	cremoris	61	LA	1.98	0.82	8.209	15.971	7.76	4.69433333333333	11.2886666666667	6.9	1.09727377392506			0	0	0	0	0	0	0	0	0	4.35	5.62	A	3.98833333333333	6.43977347286099	-0.400333333333333	6.39488521018224	0.997414946889742
Lcl-036	nsr- nis-	Lactococcus	lactis	cremoris	61	LA	1.98	0.82	8.209	15.971	7.76	4.69433333333333	11.2886666666667	6.9	1.09727377392506			0	0	0	0	0	0	0	0	0	4.35	5.62	A	3.98833333333333	6.21646242686881	-0.400333333333333	6.28855710687487	0.943675926527976
Lcl-036	nsr- nis-	Lactococcus	lactis	cremoris	61	LA	1.98	0.82	8.209	15.971	7.76	4.69433333333333	11.2886666666667	6.9	1.09727377392506			0	0	0	0	0	0	0	0	0	4.35	5.62	A	4.08833333333333	6.43761744935787	-0.300333333333333	6.39272918667913	0.996325276451442
Lcl-036	nsr- nis-	Lactococcus	lactis	cremoris	61	LA	1.98	0.82	8.209	15.971	7.76	4.69433333333333	11.2886666666667	6.9	1.09727377392506			0	0	0	0	0	0	0	0	0	4.35	5.62	A	4.08833333333333	6.21854415562143	-0.300333333333333	6.29063883562749	0.944728047842521
Lcl-036	nsr- nis-	Lactococcus	lactis	cremoris	61	LA	1.98	0.82	8.209	15.971	7.76	4.69433333333333	11.2886666666667	6.9	1.09727377392506			0	0	0	0	0	0	0	0	0	4.35	5.62	A	4.18866666666667	6.43222598334595	-0.2	6.38733772066721	0.993600389118912
Lcl-036	nsr- nis-	Lactococcus	lactis	cremoris	61	LA	1.98	0.82	8.209	15.971	7.76	4.69433333333333	11.2886666666667	6.9	1.09727377392506			0	0	0	0	0	0	0	0	0	4.35	5.62	A	4.18866666666667	6.20933599789595	-0.2	6.28143067790201	0.940074175911093
Lcl-036	nsr- nis-	Lactococcus	lactis	cremoris	61	LA	1.98	0.82	8.209	15.971	7.76	4.69433333333333	11.2886666666667	6.9	1.09727377392506			0	0	0	0	0	0	0	0	0	4.35	5.62	A	4.28866666666667	6.43222598334595	-0.0999999999999996	6.38733772066721	0.993600389118912
Lcl-036	nsr- nis-	Lactococcus	lactis	cremoris	61	LA	1.98	0.82	8.209	15.971	7.76	4.69433333333333	11.2886666666667	6.9	1.09727377392506			0	0	0	0	0	0	0	0	0	4.35	5.62	A	4.28866666666667	6.1826475801483	-0.0999999999999996	6.25474226015436	0.926585649546447
Lcl-036	nsr- nis-	Lactococcus	lactis	cremoris	61	LA	1.98	0.82	8.209	15.971	7.76	4.69433333333333	11.2886666666667	6.9	1.09727377392506			0	0	0	0	0	0	0	0	0	4.35	5.62	A	4.38866666666667	6.42467849383092	0	6.37979023115217	0.989785831348082
Lcl-036	nsr- nis-	Lactococcus	lactis	cremoris	61	LA	1.98	0.82	8.209	15.971	7.76	4.69433333333333	11.2886666666667	6.9	1.09727377392506			0	0	0	0	0	0	0	0	0	4.35	5.62	A	4.38866666666667	6.16566577237236	0	6.23776045237842	0.91800291661447
Lcl-036	nsr- nis-	Lactococcus	lactis	cremoris	61	LA	1.98	0.82	8.209	15.971	7.76	4.69433333333333	11.2886666666667	6.9	1.09727377392506			0	0	0	0	0	0	0	0	0	4.35	5.62	A	4.48833333333333	6.42467849383092	0.0996666666666668	6.37979023115217	0.989785831348082
Lcl-036	nsr- nis-	Lactococcus	lactis	cremoris	61	LA	1.98	0.82	8.209	15.971	7.76	4.69433333333333	11.2886666666667	6.9	1.09727377392506			0	0	0	0	0	0	0	0	0	4.35	5.62	A	4.48833333333333	6.141109728813	0.0996666666666668	6.21320440881906	0.905592108147154
Lcl-036	nsr- nis-	Lactococcus	lactis	cremoris	61	LA	1.98	0.82	8.209	15.971	7.76	4.69433333333333	11.2886666666667	6.9	1.09727377392506			0	0	0	0	0	0	0	0	0	4.35	5.62	A	4.58833333333333	6.42467849383092	0.199666666666667	6.37979023115217	0.989785831348082
Lcl-036	nsr- nis-	Lactococcus	lactis	cremoris	61	LA	1.98	0.82	8.209	15.971	7.76	4.69433333333333	11.2886666666667	6.9	1.09727377392506			0	0	0	0	0	0	0	0	0	4.35	5.62	A	4.58833333333333	6.11655368525364	0.199666666666667	6.1886483652597	0.893181299679837
Lcl-036	nsr- nis-	Lactococcus	lactis	cremoris	61	LA	1.98	0.82	8.209	15.971	7.76	4.69433333333333	11.2886666666667	6.9	1.09727377392506			0	0	0	0	0	0	0	0	0	4.35	5.62	A	4.68866666666667	6.43222598334595	0.3	6.38733772066721	0.993600389118912
Lcl-036	nsr- nis-	Lactococcus	lactis	cremoris	61	LA	1.98	0.82	8.209	15.971	7.76	4.69433333333333	11.2886666666667	6.9	1.09727377392506			0	0	0	0	0	0	0	0	0	4.35	5.62	A	4.68866666666667	6.11023575150226	0.3	6.18233043150832	0.889988168607725
Lcl-036	nsr- nis-	Lactococcus	lactis	cremoris	61	LA	1.98	0.82	8.209	15.971	7.76	4.69433333333333	11.2886666666667	6.9	1.09727377392506			0	0	0	0	0	0	0	0	0	4.35	5.62	A	4.7883333333333304	6.43222598334595	0.399666666666667	6.38733772066721	0.993600389118912
Lcl-036	nsr- nis-	Lactococcus	lactis	cremoris	61	LA	1.98	0.82	8.209	15.971	7.76	4.69433333333333	11.2886666666667	6.9	1.09727377392506			0	0	0	0	0	0	0	0	0	4.35	5.62	A	4.7883333333333304	6.10391781775088	0.399666666666667	6.17601249775695	0.886795037535613
Lcl-036	nsr- nis-	Lactococcus	lactis	cremoris	61	LA	1.98	0.82	8.209	15.971	7.76	4.69433333333333	11.2886666666667	6.9	1.09727377392506			0	0	0	0	0	0	0	0	0	4.35	5.62	A	4.88833333333333	6.43977347286099	0.499666666666667	6.39488521018224	0.997414946889742
Lcl-036	nsr- nis-	Lactococcus	lactis	cremoris	61	LA	1.98	0.82	8.209	15.971	7.76	4.69433333333333	11.2886666666667	6.9	1.09727377392506			0	0	0	0	0	0	0	0	0	4.35	5.62	A	4.88833333333333	6.08860549710355	0.499666666666667	6.16070017710961	0.879056075911568
Lcl-036	nsr- nis-	Lactococcus	lactis	cremoris	61	LA	1.98	0.82	8.209	15.971	7.76	4.69433333333333	11.2886666666667	6.9	1.09727377392506			0	0	0	0	0	0	0	0	0	4.35	5.62	A	4.98833333333333	6.43977347286099	0.599666666666667	6.39488521018224	0.997414946889742
Lcl-036	nsr- nis-	Lactococcus	lactis	cremoris	61	LA	1.98	0.82	8.209	15.971	7.76	4.69433333333333	11.2886666666667	6.9	1.09727377392506			0	0	0	0	0	0	0	0	0	4.35	5.62	A	4.98833333333333	6.08086741223963	0.599666666666667	6.15296209224569	0.875145189822863
Lcl-036	nsr- nis-	Lactococcus	lactis	cremoris	61	LA	1.98	0.82	8.209	15.971	7.76	4.69433333333333	11.2886666666667	6.9	1.09727377392506			0	0	0	0	0	0	0	0	0	4.35	5.62	A	5.08866666666667	6.44192949636411	0.7	6.39704123368536	0.998504617328042
Lcl-036	nsr- nis-	Lactococcus	lactis	cremoris	61	LA	1.98	0.82	8.209	15.971	7.76	4.69433333333333	11.2886666666667	6.9	1.09727377392506			0	0	0	0	0	0	0	0	0	4.35	5.62	A	5.08866666666667	6.0741230627778	0.7	6.14621774278386	0.87173654505462
Lcl-036	nsr- nis-	Lactococcus	lactis	cremoris	61	LA	1.98	0.82	8.209	15.971	7.76	4.69433333333333	11.2886666666667	6.9	1.09727377392506			0	0	0	0	0	0	0	0	0	4.35	5.62	A	5.18833333333333	6.44192949636411	0.799666666666667	6.39704123368536	0.998504617328042
Lcl-036	nsr- nis-	Lactococcus	lactis	cremoris	61	LA	1.98	0.82	8.209	15.971	7.76	4.69433333333333	11.2886666666667	6.9	1.09727377392506			0	0	0	0	0	0	0	0	0	4.35	5.62	A	5.18833333333333	6.05746967510459	0.799666666666667	6.12956435511065	0.863319798104137
Lcl-036	nsr- nis-	Lactococcus	lactis	cremoris	61	LA	1.98	0.82	8.209	15.971	7.76	4.69433333333333	11.2886666666667	6.9	1.09727377392506			0	0	0	0	0	0	0	0	0	4.35	5.62	A	5.2883333333333304	6.428995083908	0.899666666666667	6.38410682122925	0.991967468326738
Lcl-036	nsr- nis-	Lactococcus	lactis	cremoris	61	LA	1.98	0.82	8.209	15.971	7.76	4.69433333333333	11.2886666666667	6.9	1.09727377392506			0	0	0	0	0	0	0	0	0	4.35	5.62	A	5.2883333333333304	6.04081628743138	0.899666666666667	6.11291096743744	0.854903051153653
Lcl-036	nsr- nis-	Lactococcus	lactis	cremoris	61	LA	1.98	0.82	8.209	15.971	7.76	4.69433333333333	11.2886666666667	6.9	1.09727377392506			0	0	0	0	0	0	0	0	0	4.35	5.62	A	5.38833333333333	6.428995083908	0.999666666666667	6.38410682122925	0.991967468326738
Lcl-036	nsr- nis-	Lactococcus	lactis	cremoris	61	LA	1.98	0.82	8.209	15.971	7.76	4.69433333333333	11.2886666666667	6.9	1.09727377392506			0	0	0	0	0	0	0	0	0	4.35	5.62	A	5.38833333333333	6.02556132924743	0.999666666666667	6.09765600925349	0.847193080948548
Lcl-036	nsr- nis-	Lactococcus	lactis	cremoris	61	LA	1.98	0.82	8.209	15.971	7.76	4.69433333333333	11.2886666666667	6.9	1.09727377392506			0	0	0	0	0	0	0	0	0	4.35	5.62	A	5.48916666666667	6.42144759439296	1.1005	6.37655933171422	0.988152910555908
Lcl-036	nsr- nis-	Lactococcus	lactis	cremoris	61	LA	1.98	0.82	8.209	15.971	7.76	4.69433333333333	11.2886666666667	6.9	1.09727377392506			0	0	0	0	0	0	0	0	0	4.35	5.62	A	5.48916666666667	6.01079491364196	1.1005	6.08288959364802	0.839730023824328
Lcl-036	nsr- nis-	Lactococcus	lactis	cremoris	61	LA	1.98	0.82	8.209	15.971	7.76	4.69433333333333	11.2886666666667	6.9	1.09727377392506			0	0	0	0	0	0	0	0	0	4.35	5.62	A	5.58833333333333	6.41605659280702	1.19966666666667	6.37116833012827	0.985428257947745
Lcl-036	nsr- nis-	Lactococcus	lactis	cremoris	61	LA	1.98	0.82	8.209	15.971	7.76	4.69433333333333	11.2886666666667	6.9	1.09727377392506			0	0	0	0	0	0	0	0	0	4.35	5.62	A	5.58833333333333	5.98699229826842	1.19966666666667	6.05908697827449	0.827700003609222
Lcl-036	nsr- nis-	Lactococcus	lactis	cremoris	61	LA	1.98	0.82	8.209	15.971	7.76	4.69433333333333	11.2886666666667	6.9	1.09727377392506			0	0	0	0	0	0	0	0	0	4.35	5.62	A	5.68833333333333	6.41821145041181	1.29966666666667	6.37332318773306	0.986517339132291
Lcl-036	nsr- nis-	Lactococcus	lactis	cremoris	61	LA	1.98	0.82	8.209	15.971	7.76	4.69433333333333	11.2886666666667	6.9	1.09727377392506			0	0	0	0	0	0	0	0	0	4.35	5.62	A	5.68833333333333	5.9640613332903	1.29966666666667	6.03615601329636	0.816110522037147
Lcl-036	nsr- nis-	Lactococcus	lactis	cremoris	61	LA	1.98	0.82	8.209	15.971	7.76	4.69433333333333	11.2886666666667	6.9	1.09727377392506			0	0	0	0	0	0	0	0	0	4.35	5.62	A	5.7883333333333304	6.43114586286792	1.39966666666667	6.38625760018917	0.993054488133595
Lcl-036	nsr- nis-	Lactococcus	lactis	cremoris	61	LA	1.98	0.82	8.209	15.971	7.76	4.69433333333333	11.2886666666667	6.9	1.09727377392506			0	0	0	0	0	0	0	0	0	4.35	5.62	A	5.7883333333333304	5.94113036831217	1.39966666666667	6.01322504831823	0.804521040465071
Lcl-036	nsr- nis-	Lactococcus	lactis	cremoris	61	LA	1.98	0.82	8.209	15.971	7.76	4.69433333333333	11.2886666666667	6.9	1.09727377392506			0	0	0	0	0	0	0	0	0	4.35	5.62	A	5.88833333333333	6.42575486128197	1.49966666666667	6.38086659860323	0.990329835525432
Lcl-036	nsr- nis-	Lactococcus	lactis	cremoris	61	LA	1.98	0.82	8.209	15.971	7.76	4.69433333333333	11.2886666666667	6.9	1.09727377392506			0	0	0	0	0	0	0	0	0	4.35	5.62	A	5.88833333333333	5.91848584362604	1.49966666666667	5.9905805236321	0.793076327963496
Lcl-036	nsr- nis-	Lactococcus	lactis	cremoris	61	LA	1.98	0.82	8.209	15.971	7.76	4.69433333333333	11.2886666666667	6.9	1.09727377392506			0	0	0	0	0	0	0	0	0	4.35	5.62	A	5.98866666666667	6.42791134921106	1.6	6.38302308653232	0.991419740688099
Lcl-036	nsr- nis-	Lactococcus	lactis	cremoris	61	LA	1.98	0.82	8.209	15.971	7.76	4.69433333333333	11.2886666666667	6.9	1.09727377392506			0	0	0	0	0	0	0	0	0	4.35	5.62	A	5.98866666666667	5.89535277636142	1.6	5.96744745636748	0.781384702381034
Lcl-036	nsr- nis-	Lactococcus	lactis	cremoris	61	LA	1.98	0.82	8.209	15.971	7.76	4.69433333333333	11.2886666666667	6.9	1.09727377392506			0	0	0	0	0	0	0	0	0	4.35	5.62	A	6.08866666666667	6.42791134921106	1.7	6.38302308653232	0.991419740688099
Lcl-036	nsr- nis-	Lactococcus	lactis	cremoris	61	LA	1.98	0.82	8.209	15.971	7.76	4.69433333333333	11.2886666666667	6.9	1.09727377392506			0	0	0	0	0	0	0	0	0	4.35	5.62	A	6.08866666666667	5.88026217346278	1.7	5.95235685346884	0.773757798568997
Lcl-036	nsr- nis-	Lactococcus	lactis	cremoris	61	LA	1.98	0.82	8.209	15.971	7.76	4.69433333333333	11.2886666666667	6.9	1.09727377392506			0	0	0	0	0	0	0	0	0	4.35	5.62	A	6.18833333333333	6.41282207915016	1.79966666666667	6.36793381647142	0.983793510502249
Lcl-036	nsr- nis-	Lactococcus	lactis	cremoris	61	LA	1.98	0.82	8.209	15.971	7.76	4.69433333333333	11.2886666666667	6.9	1.09727377392506			0	0	0	0	0	0	0	0	0	4.35	5.62	A	6.18833333333333	5.86534912455823	1.79966666666667	5.9374438045643	0.766220631876383
Lcl-036	nsr- nis-	Lactococcus	lactis	cremoris	61	LA	1.98	0.82	8.209	15.971	7.76	4.69433333333333	11.2886666666667	6.9	1.09727377392506			0	0	0	0	0	0	0	0	0	4.35	5.62	A	6.2883333333333304	6.40743107756421	1.89966666666667	6.36254281488547	0.981068857894086
Lcl-036	nsr- nis-	Lactococcus	lactis	cremoris	61	LA	1.98	0.82	8.209	15.971	7.76	4.69433333333333	11.2886666666667	6.9	1.09727377392506			0	0	0	0	0	0	0	0	0	4.35	5.62	A	6.2883333333333304	5.84324097544907	1.89966666666667	5.91533565545513	0.75504700761165
Lcl-036	nsr- nis-	Lactococcus	lactis	cremoris	61	LA	1.98	0.82	8.209	15.971	7.76	4.69433333333333	11.2886666666667	6.9	1.09727377392506			0	0	0	0	0	0	0	0	0	4.35	5.62	A	6.38883333333333	6.40743107756421	2.00016666666667	6.36254281488547	0.981068857894086
Lcl-036	nsr- nis-	Lactococcus	lactis	cremoris	61	LA	1.98	0.82	8.209	15.971	7.76	4.69433333333333	11.2886666666667	6.9	1.09727377392506			0	0	0	0	0	0	0	0	0	4.35	5.62	A	6.38883333333333	5.82844234345462	2.00016666666667	5.90053702346068	0.747567668082972
Lcl-036	nsr- nis-	Lactococcus	lactis	cremoris	61	LA	1.98	0.82	8.209	15.971	7.76	4.69433333333333	11.2886666666667	6.9	1.09727377392506			0	0	0	0	0	0	0	0	0	4.35	5.62	A	6.48866666666667	6.40743107756421	2.1	6.36254281488547	0.981068857894086
Lcl-036	nsr- nis-	Lactococcus	lactis	cremoris	61	LA	1.98	0.82	8.209	15.971	7.76	4.69433333333333	11.2886666666667	6.9	1.09727377392506			0	0	0	0	0	0	0	0	0	4.35	5.62	A	6.48866666666667	5.80633103798409	2.1	5.87842571799015	0.736392448569548
Lcl-036	nsr- nis-	Lactococcus	lactis	cremoris	61	LA	1.98	0.82	8.209	15.971	7.76	4.69433333333333	11.2886666666667	6.9	1.09727377392506			0	0	0	0	0	0	0	0	0	4.35	5.62	A	6.58833333333333	6.40743107756421	2.19966666666667	6.36254281488547	0.981068857894086
Lcl-036	nsr- nis-	Lactococcus	lactis	cremoris	61	LA	1.98	0.82	8.209	15.971	7.76	4.69433333333333	11.2886666666667	6.9	1.09727377392506			0	0	0	0	0	0	0	0	0	4.35	5.62	A	6.58833333333333	5.7831996024729	2.19966666666667	5.85529428247896	0.724701647687498
Lcl-036	nsr- nis-	Lactococcus	lactis	cremoris	61	LA	1.98	0.82	8.209	15.971	7.76	4.69433333333333	11.2886666666667	6.9	1.09727377392506			0	0	0	0	0	0	0	0	0	4.35	5.62	A	6.68833333333333	6.40554813434214	2.29966666666667	6.36065987166339	0.980117204276614
Lcl-036	nsr- nis-	Lactococcus	lactis	cremoris	61	LA	1.98	0.82	8.209	15.971	7.76	4.69433333333333	11.2886666666667	6.9	1.09727377392506			0	0	0	0	0	0	0	0	0	4.35	5.62	A	6.68833333333333	5.76043664124444	2.29966666666667	5.8325313212505	0.713197076469722
Lcl-036	nsr- nis-	Lactococcus	lactis	cremoris	61	LA	1.98	0.82	8.209	15.971	7.76	4.69433333333333	11.2886666666667	6.9	1.09727377392506			0	0	0	0	0	0	0	0	0	4.35	5.62	A	6.7883333333333304	6.39800472347197	2.39966666666667	6.35311646079322	0.976304707883472
Lcl-036	nsr- nis-	Lactococcus	lactis	cremoris	61	LA	1.98	0.82	8.209	15.971	7.76	4.69433333333333	11.2886666666667	6.9	1.09727377392506			0	0	0	0	0	0	0	0	0	4.35	5.62	A	6.7883333333333304	5.7374392282765	2.39966666666667	5.80953390828256	0.701574011585557
Lcl-036	nsr- nis-	Lactococcus	lactis	cremoris	61	LA	1.98	0.82	8.209	15.971	7.76	4.69433333333333	11.2886666666667	6.9	1.09727377392506			0	0	0	0	0	0	0	0	0	4.35	5.62	A	6.88833333333333	6.38857836937973	2.49966666666667	6.34369010670098	0.971540557872859
Lcl-036	nsr- nis-	Lactococcus	lactis	cremoris	61	LA	1.98	0.82	8.209	15.971	7.76	4.69433333333333	11.2886666666667	6.9	1.09727377392506			0	0	0	0	0	0	0	0	0	4.35	5.62	A	6.88833333333333	5.71444181530857	2.49966666666667	5.78653649531463	0.689950946701392
Lcl-036	nsr- nis-	Lactococcus	lactis	cremoris	61	LA	1.98	0.82	8.209	15.971	7.76	4.69433333333333	11.2886666666667	6.9	1.09727377392506			0	0	0	0	0	0	0	0	0	4.35	5.62	A	6.98866666666667	6.38103495850956	2.6	6.33614669583082	0.967728061479717
Lcl-036	nsr- nis-	Lactococcus	lactis	cremoris	61	LA	1.98	0.82	8.209	15.971	7.76	4.69433333333333	11.2886666666667	6.9	1.09727377392506			0	0	0	0	0	0	0	0	0	4.35	5.62	A	6.98866666666667	5.69713553999933	2.6	5.76923022000539	0.681204225446139
Lcl-036	nsr- nis-	Lactococcus	lactis	cremoris	61	LA	1.98	0.82	8.209	15.971	7.76	4.69433333333333	11.2886666666667	6.9	1.09727377392506			0	0	0	0	0	0	0	0	0	4.35	5.62	A	7.08866666666667	6.38103495850956	2.7	6.33614669583082	0.967728061479717
Lcl-036	nsr- nis-	Lactococcus	lactis	cremoris	61	LA	1.98	0.82	8.209	15.971	7.76	4.69433333333333	11.2886666666667	6.9	1.09727377392506			0	0	0	0	0	0	0	0	0	4.35	5.62	A	7.08866666666667	5.66771559201699	2.7	5.73981027202305	0.66633516322752
Lcl-036	nsr- nis-	Lactococcus	lactis	cremoris	61	LA	1.98	0.82	8.209	15.971	7.76	4.69433333333333	11.2886666666667	6.9	1.09727377392506			0	0	0	0	0	0	0	0	0	4.35	5.62	A	7.18866666666667	6.38291790173164	2.8	6.3380296390529	0.968679715097189
Lcl-036	nsr- nis-	Lactococcus	lactis	cremoris	61	LA	1.98	0.82	8.209	15.971	7.76	4.69433333333333	11.2886666666667	6.9	1.09727377392506			0	0	0	0	0	0	0	0	0	4.35	5.62	A	7.18866666666667	5.64553070154176	2.8	5.71762538154782	0.655122753301184
Lcl-036	nsr- nis-	Lactococcus	lactis	cremoris	61	LA	1.98	0.82	8.209	15.971	7.76	4.69433333333333	11.2886666666667	6.9	1.09727377392506			0	0	0	0	0	0	0	0	0	4.35	5.62	A	7.2883333333333304	6.38291790173164	2.89966666666667	6.3380296390529	0.968679715097189
Lcl-036	nsr- nis-	Lactococcus	lactis	cremoris	61	LA	1.98	0.82	8.209	15.971	7.76	4.69433333333333	11.2886666666667	6.9	1.09727377392506			0	0	0	0	0	0	0	0	0	4.35	5.62	A	7.2883333333333304	5.62342407974845	2.89966666666667	5.69551875975451	0.643949900953329
Lcl-036	nsr- nis-	Lactococcus	lactis	cremoris	61	LA	1.98	0.82	8.209	15.971	7.76	4.69433333333333	11.2886666666667	6.9	1.09727377392506			0	0	0	0	0	0	0	0	0	4.35	5.62	A	7.38833333333333	6.38480084495372	2.99966666666667	6.33991258227498	0.969631368714661
Lcl-036	nsr- nis-	Lactococcus	lactis	cremoris	61	LA	1.98	0.82	8.209	15.971	7.76	4.69433333333333	11.2886666666667	6.9	1.09727377392506			0	0	0	0	0	0	0	0	0	4.35	5.62	A	7.38833333333333	5.59920660451425	2.99966666666667	5.67130128452031	0.631710207455186
Lcl-036	nsr- nis-	Lactococcus	lactis	cremoris	61	LA	1.98	0.82	8.209	15.971	7.76	4.69433333333333	11.2886666666667	6.9	1.09727377392506			0	0	0	0	0	0	0	0	0	4.35	5.62	A	7.48833333333333	6.38291790173164	3.09966666666667	6.3380296390529	0.968679715097189
Lcl-036	nsr- nis-	Lactococcus	lactis	cremoris	61	LA	1.98	0.82	8.209	15.971	7.76	4.69433333333333	11.2886666666667	6.9	1.09727377392506			0	0	0	0	0	0	0	0	0	4.35	5.62	A	7.48833333333333	5.57169220878623	3.09966666666667	5.64378688879229	0.617804225628393
Lcl-036	nsr- nis-	Lactococcus	lactis	cremoris	61	LA	1.98	0.82	8.209	15.971	7.76	4.69433333333333	11.2886666666667	6.9	1.09727377392506			0	0	0	0	0	0	0	0	0	4.35	5.62	A	7.58833333333333	6.38291790173164	3.19966666666667	6.3380296390529	0.968679715097189
Lcl-036	nsr- nis-	Lactococcus	lactis	cremoris	61	LA	1.98	0.82	8.209	15.971	7.76	4.69433333333333	11.2886666666667	6.9	1.09727377392506			0	0	0	0	0	0	0	0	0	4.35	5.62	A	7.58833333333333	5.54999510537237	3.19966666666667	5.62208978537843	0.606838346938935
Lcl-036	nsr- nis-	Lactococcus	lactis	cremoris	61	LA	1.98	0.82	8.209	15.971	7.76	4.69433333333333	11.2886666666667	6.9	1.09727377392506			0	0	0	0	0	0	0	0	0	4.35	5.62	A	7.68833333333333	6.39046131260181	3.29966666666667	6.34557304992306	0.972492211490331
Lcl-036	nsr- nis-	Lactococcus	lactis	cremoris	61	LA	1.98	0.82	8.209	15.971	7.76	4.69433333333333	11.2886666666667	6.9	1.09727377392506			0	0	0	0	0	0	0	0	0	4.35	5.62	A	7.68833333333333	5.5282980019585	3.29966666666667	5.60039268196456	0.595872468249475
Lcl-036	nsr- nis-	Lactococcus	lactis	cremoris	61	LA	1.98	0.82	8.209	15.971	7.76	4.69433333333333	11.2886666666667	6.9	1.09727377392506			0	0	0	0	0	0	0	0	0	4.35	5.62	A	7.7883333333333304	6.3961177666256	3.39966666666667	6.35122950394685	0.9753510257502
Lcl-036	nsr- nis-	Lactococcus	lactis	cremoris	61	LA	1.98	0.82	8.209	15.971	7.76	4.69433333333333	11.2886666666667	6.9	1.09727377392506			0	0	0	0	0	0	0	0	0	4.35	5.62	A	7.7883333333333304	5.50426670461683	3.39966666666667	5.57636138462289	0.583726870453655
Lcl-036	nsr- nis-	Lactococcus	lactis	cremoris	61	LA	1.98	0.82	8.209	15.971	7.76	4.69433333333333	11.2886666666667	6.9	1.09727377392506			0	0	0	0	0	0	0	0	0	4.35	5.62	A	7.88833333333333	6.40366117749576	3.49966666666667	6.35877291481702	0.979163522143342
Lcl-036	nsr- nis-	Lactococcus	lactis	cremoris	61	LA	1.98	0.82	8.209	15.971	7.76	4.69433333333333	11.2886666666667	6.9	1.09727377392506			0	0	0	0	0	0	0	0	0	4.35	5.62	A	7.88833333333333	5.47497594752249	3.49966666666667	5.54707062752856	0.568923102278144
Lcl-036	nsr- nis-	Lactococcus	lactis	cremoris	61	LA	1.98	0.82	8.209	15.971	7.76	4.69433333333333	11.2886666666667	6.9	1.09727377392506			0	0	0	0	0	0	0	0	0	4.35	5.62	A	7.98833333333333	6.40554412071784	3.59966666666667	6.3606558580391	0.980115175760814
Lcl-036	nsr- nis-	Lactococcus	lactis	cremoris	61	LA	1.98	0.82	8.209	15.971	7.76	4.69433333333333	11.2886666666667	6.9	1.09727377392506			0	0	0	0	0	0	0	0	0	4.35	5.62	A	7.98833333333333	5.45060364673935	3.59966666666667	5.52269832674542	0.556605158787118
Lcl-036	nsr- nis-	Lactococcus	lactis	cremoris	61	LA	1.98	0.82	8.209	15.971	7.76	4.69433333333333	11.2886666666667	6.9	1.09727377392506			0	0	0	0	0	0	0	0	0	4.35	5.62	A	8.08866666666667	6.39235748147424	3.7	6.3474692187955	0.973450549450621
Lcl-036	nsr- nis-	Lactococcus	lactis	cremoris	61	LA	1.98	0.82	8.209	15.971	7.76	4.69433333333333	11.2886666666667	6.9	1.09727377392506			0	0	0	0	0	0	0	0	0	4.35	5.62	A	8.08866666666667	5.43674540406408	3.7	5.50884008407014	0.549601099068759
Lcl-036	nsr- nis-	Lactococcus	lactis	cremoris	61	LA	1.98	0.82	8.209	15.971	7.76	4.69433333333333	11.2886666666667	6.9	1.09727377392506			0	0	0	0	0	0	0	0	0	4.35	5.62	A	8.18833333333333	6.37729405147558	3.79966666666667	6.33240578879684	0.965837379025904
Lcl-036	nsr- nis-	Lactococcus	lactis	cremoris	61	LA	1.98	0.82	8.209	15.971	7.76	4.69433333333333	11.2886666666667	6.9	1.09727377392506			0	0	0	0	0	0	0	0	0	4.35	5.62	A	8.18833333333333	5.42288716138881	3.79966666666667	5.49498184139487	0.542597039350399
Lcl-036	nsr- nis-	Lactococcus	lactis	cremoris	61	LA	1.98	0.82	8.209	15.971	7.76	4.69433333333333	11.2886666666667	6.9	1.09727377392506			0	0	0	0	0	0	0	0	0	4.35	5.62	A	8.28866666666667	6.36975465422971	3.9	6.32486639155096	0.962026911148562
Lcl-036	nsr- nis-	Lactococcus	lactis	cremoris	61	LA	1.98	0.82	8.209	15.971	7.76	4.69433333333333	11.2886666666667	6.9	1.09727377392506			0	0	0	0	0	0	0	0	0	4.35	5.62	A	8.28866666666667	5.41551684819526	3.9	5.48761152820132	0.53887202782042
Lcl-036	nsr- nis-	Lactococcus	lactis	cremoris	61	LA	1.98	0.82	8.209	15.971	7.76	4.69433333333333	11.2886666666667	6.9	1.09727377392506			0	0	0	0	0	0	0	0	0	4.35	5.62	A	8.38866666666667	6.36786769738334	4	6.32297943470459	0.96107322901529
Lcl-036	nsr- nis-	Lactococcus	lactis	cremoris	61	LA	1.98	0.82	8.209	15.971	7.76	4.69433333333333	11.2886666666667	6.9	1.09727377392506			0	0	0	0	0	0	0	0	0	4.35	5.62	A	8.38866666666667	5.41189274010311	4	5.48398742010917	0.537040376427237
Lcl-036	nsr- nis-	Lactococcus	lactis	cremoris	61	LA	1.98	0.82	8.209	15.971	7.76	4.69433333333333	11.2886666666667	6.9	1.09727377392506			0	0	0	0	0	0	0	0	0	4.35	5.62	A	8.48866666666667	6.3622244690099	4.1	6.31733620633115	0.958221099098239
Lcl-036	nsr- nis-	Lactococcus	lactis	cremoris	61	LA	1.98	0.82	8.209	15.971	7.76	4.69433333333333	11.2886666666667	6.9	1.09727377392506			0	0	0	0	0	0	0	0	0	4.35	5.62	A	8.48866666666667	5.39455371186295	4.1	5.46664839186901	0.528277101595205
Lcl-036	nsr- nis-	Lactococcus	lactis	cremoris	61	LA	1.98	0.82	8.209	15.971	7.76	4.69433333333333	11.2886666666667	6.9	1.09727377392506			0	0	0	0	0	0	0	0	0	4.35	5.62	A	8.58833333333333	6.3622244690099	4.19966666666667	6.31733620633115	0.958221099098239
Lcl-036	nsr- nis-	Lactococcus	lactis	cremoris	61	LA	1.98	0.82	8.209	15.971	7.76	4.69433333333333	11.2886666666667	6.9	1.09727377392506			0	0	0	0	0	0	0	0	0	4.35	5.62	A	8.58833333333333	5.37041321639123	4.19966666666667	5.44250789639729	0.516076314245999
Lcl-036	nsr- nis-	Lactococcus	lactis	cremoris	61	LA	1.98	0.82	8.209	15.971	7.76	4.69433333333333	11.2886666666667	6.9	1.09727377392506			0	0	0	0	0	0	0	0	0	4.35	5.62	A	8.68866666666667	6.36410125976496	4.3	6.31921299708621	0.959169643212764
Lcl-036	nsr- nis-	Lactococcus	lactis	cremoris	61	LA	1.98	0.82	8.209	15.971	7.76	4.69433333333333	11.2886666666667	6.9	1.09727377392506			0	0	0	0	0	0	0	0	0	4.35	5.62	A	8.68866666666667	5.33925917862333	4.3	5.41135385862939	0.500330830052411
Lcl-036	nsr- nis-	Lactococcus	lactis	cremoris	61	LA	1.98	0.82	8.209	15.971	7.76	4.69433333333333	11.2886666666667	6.9	1.09727377392506			0	0	0	0	0	0	0	0	0	4.35	5.62	A	8.78833333333333	6.3603409746136	4.39966666666667	6.31545271193485	0.957269166913184
Lcl-036	nsr- nis-	Lactococcus	lactis	cremoris	61	LA	1.98	0.82	8.209	15.971	7.76	4.69433333333333	11.2886666666667	6.9	1.09727377392506			0	0	0	0	0	0	0	0	0	4.35	5.62	A	8.78833333333333	5.30046871303023	4.39966666666667	5.37256339303629	0.480725837999428
Lcl-036	nsr- nis-	Lactococcus	lactis	cremoris	61	LA	1.98	0.82	8.209	15.971	7.76	4.69433333333333	11.2886666666667	6.9	1.09727377392506			0	0	0	0	0	0	0	0	0	4.35	5.62	A	8.88866666666667	6.34716450146131	4.5	6.30227623878256	0.950609678621738
Lcl-036	nsr- nis-	Lactococcus	lactis	cremoris	61	LA	1.98	0.82	8.209	15.971	7.76	4.69433333333333	11.2886666666667	6.9	1.09727377392506			0	0	0	0	0	0	0	0	0	4.35	5.62	A	8.88866666666667	5.24704710290364	4.5	5.3191417829097	0.453726155835886
Lcl-036	nsr- nis-	Lactococcus	lactis	cremoris	61	LA	1.98	0.82	8.209	15.971	7.76	4.69433333333333	11.2886666666667	6.9	1.09727377392506			0	0	0	0	0	0	0	0	0	4.35	5.62	A	8.98866666666667	6.34716450146131	4.6	6.30227623878256	0.950609678621738
Lcl-036	nsr- nis-	Lactococcus	lactis	cremoris	61	LA	1.98	0.82	8.209	15.971	7.76	4.69433333333333	11.2886666666667	6.9	1.09727377392506			0	0	0	0	0	0	0	0	0	4.35	5.62	A	8.98866666666667	5.20734041292505	4.6	5.27943509293112	0.433658097111193
Lcl-036	nsr- nis-	Lactococcus	lactis	cremoris	61	LA	1.98	0.82	8.209	15.971	7.76	4.69433333333333	11.2886666666667	6.9	1.09727377392506			0	0	0	0	0	0	0	0	0	4.35	5.62	A	9.08866666666667	6.33940713912893	4.7	6.29451887645018	0.946689049555984
Lcl-036	nsr- nis-	Lactococcus	lactis	cremoris	61	LA	1.98	0.82	8.209	15.971	7.76	4.69433333333333	11.2886666666667	6.9	1.09727377392506			0	0	0	0	0	0	0	0	0	4.35	5.62	A	9.08866666666667	5.15221919738817	4.7	5.22431387739423	0.405799421634408
Lcl-036	nsr- nis-	Lactococcus	lactis	cremoris	61	LA	1.98	0.82	8.209	15.971	7.76	4.69433333333333	11.2886666666667	6.9	1.09727377392506			0	0	0	0	0	0	0	0	0	4.35	5.62	A	9.18866666666667	6.33940713912893	4.8	6.29451887645018	0.946689049555984
Lcl-036	nsr- nis-	Lactococcus	lactis	cremoris	61	LA	1.98	0.82	8.209	15.971	7.76	4.69433333333333	11.2886666666667	6.9	1.09727377392506			0	0	0	0	0	0	0	0	0	4.35	5.62	A	9.18866666666667	5.10411152414746	4.8	5.17620620415352	0.381485443002005
Lcl-036	nsr- nis-	Lactococcus	lactis	cremoris	61	LA	1.98	0.82	8.209	15.971	7.76	4.69433333333333	11.2886666666667	6.9	1.09727377392506			0	0	0	0	0	0	0	0	0	4.35	5.62	A	9.28866666666667	6.32553677503107	4.9	6.28064851235233	0.939678863579797
Lcl-036	nsr- nis-	Lactococcus	lactis	cremoris	61	LA	1.98	0.82	8.209	15.971	7.76	4.69433333333333	11.2886666666667	6.9	1.09727377392506			0	0	0	0	0	0	0	0	0	4.35	5.62	A	9.28866666666667	5.0546638650418	4.9	5.12675854504786	0.356494225469991
Lcl-036	nsr- nis-	Lactococcus	lactis	cremoris	61	LA	1.98	0.82	8.209	15.971	7.76	4.69433333333333	11.2886666666667	6.9	1.09727377392506			0	0	0	0	0	0	0	0	0	4.35	5.62	A	9.38833333333333	6.31965620345375	4.99966666666667	6.274767940775	0.936706778628567
Lcl-036	nsr- nis-	Lactococcus	lactis	cremoris	61	LA	1.98	0.82	8.209	15.971	7.76	4.69433333333333	11.2886666666667	6.9	1.09727377392506			0	0	0	0	0	0	0	0	0	4.35	5.62	A	9.38833333333333	5.02347145856178	4.99966666666667	5.09556613856784	0.340729349441718
Lcl-036	nsr- nis-	Lactococcus	lactis	cremoris	61	LA	1.98	0.82	8.209	15.971	7.76	4.69433333333333	11.2886666666667	6.9	1.09727377392506			0	0	0	0	0	0	0	0	0	4.35	5.62	A	9.48833333333333	6.31189884112136	5.09966666666667	6.26701057844262	0.932786149562812
Lcl-036	nsr- nis-	Lactococcus	lactis	cremoris	61	LA	1.98	0.82	8.209	15.971	7.76	4.69433333333333	11.2886666666667	6.9	1.09727377392506			0	0	0	0	0	0	0	0	0	4.35	5.62	A	9.48833333333333	4.97393027583986	5.09966666666667	5.04602495584592	0.31569086437307
Lcl-036	nsr- nis-	Lactococcus	lactis	cremoris	61	LA	1.98	0.82	8.209	15.971	7.76	4.69433333333333	11.2886666666667	6.9	1.09727377392506			0	0	0	0	0	0	0	0	0	4.35	5.62	A	9.58833333333333	6.30578583935589	5.19966666666667	6.26089757667714	0.92969659265238
Lcl-036	nsr- nis-	Lactococcus	lactis	cremoris	61	LA	1.98	0.82	8.209	15.971	7.76	4.69433333333333	11.2886666666667	6.9	1.09727377392506			0	0	0	0	0	0	0	0	0	4.35	5.62	A	9.58833333333333	4.94888453696187	5.19966666666667	5.02097921696793	0.303032560221354
Lcl-036	nsr- nis-	Lactococcus	lactis	cremoris	61	LA	1.98	0.82	8.209	15.971	7.76	4.69433333333333	11.2886666666667	6.9	1.09727377392506			0	0	0	0	0	0	0	0	0	4.35	5.62	A	9.68833333333333	6.29191547525803	5.29966666666667	6.24702721257929	0.922686406676194
Lcl-036	nsr- nis-	Lactococcus	lactis	cremoris	61	LA	1.98	0.82	8.209	15.971	7.76	4.69433333333333	11.2886666666667	6.9	1.09727377392506			0	0	0	0	0	0	0	0	0	4.35	5.62	A	9.68833333333333	4.91149462384096	5.29966666666667	4.98358930384702	0.284135417885233
Lcl-036	nsr- nis-	Lactococcus	lactis	cremoris	61	LA	1.98	0.82	8.209	15.971	7.76	4.69433333333333	11.2886666666667	6.9	1.09727377392506			0	0	0	0	0	0	0	0	0	4.35	5.62	A	9.78833333333333	6.29802847702351	5.39966666666667	6.25314021434476	0.925775963586626
Lcl-036	nsr- nis-	Lactococcus	lactis	cremoris	61	LA	1.98	0.82	8.209	15.971	7.76	4.69433333333333	11.2886666666667	6.9	1.09727377392506			0	0	0	0	0	0	0	0	0	4.35	5.62	A	9.78833333333333	4.88691096225298	5.39966666666667	4.95900564225904	0.27171065105925
Lcl-036	nsr- nis-	Lactococcus	lactis	cremoris	61	LA	1.98	0.82	8.209	15.971	7.76	4.69433333333333	11.2886666666667	6.9	1.09727377392506			0	0	0	0	0	0	0	0	0	4.35	5.62	A	9.88833333333333	6.2996293211754	5.49966666666667	6.25474105849666	0.926585042219639
Lcl-036	nsr- nis-	Lactococcus	lactis	cremoris	61	LA	1.98	0.82	8.209	15.971	7.76	4.69433333333333	11.2886666666667	6.9	1.09727377392506			0	0	0	0	0	0	0	0	0	4.35	5.62	A	9.88833333333333	4.84870379108781	5.49966666666667	4.92079847109387	0.252400460382047
Lcl-036	nsr- nis-	Lactococcus	lactis	cremoris	61	LA	1.98	0.82	8.209	15.971	7.76	4.69433333333333	11.2886666666667	6.9	1.09727377392506			0	0	0	0	0	0	0	0	0	4.35	5.62	A	9.98833333333333	6.29351631940993	5.59966666666667	6.24862805673118	0.923495485309207
Lcl-036	nsr- nis-	Lactococcus	lactis	cremoris	61	LA	1.98	0.82	8.209	15.971	7.76	4.69433333333333	11.2886666666667	6.9	1.09727377392506			0	0	0	0	0	0	0	0	0	4.35	5.62	A	9.98833333333333	4.82413918413052	5.59966666666667	4.89623386413659	0.239985323909237
Lcl-036	nsr- nis-	Lactococcus	lactis	cremoris	61	LA	1.98	0.82	8.209	15.971	7.76	4.69433333333333	11.2886666666667	6.9	1.09727377392506			0	0	0	0	0	0	0	0	0	4.35	5.62	A	10.0883333333333	6.3012301653273	5.69966666666667	6.25634190264856	0.927394120852653
Lcl-036	nsr- nis-	Lactococcus	lactis	cremoris	61	LA	1.98	0.82	8.209	15.971	7.76	4.69433333333333	11.2886666666667	6.9	1.09727377392506			0	0	0	0	0	0	0	0	0	4.35	5.62	A	10.0883333333333	4.7927373933359	5.69966666666667	4.86483207334196	0.224114623478983
Lcl-036	nsr- nis-	Lactococcus	lactis	cremoris	61	LA	1.98	0.82	8.209	15.971	7.76	4.69433333333333	11.2886666666667	6.9	1.09727377392506			0	0	0	0	0	0	0	0	0	4.35	5.62	A	10.1883333333333	6.30308645454799	5.79966666666667	6.25819819186925	0.928332303338046
Lcl-036	nsr- nis-	Lactococcus	lactis	cremoris	61	LA	1.98	0.82	8.209	15.971	7.76	4.69433333333333	11.2886666666667	6.9	1.09727377392506			0	0	0	0	0	0	0	0	0	4.35	5.62	A	10.1883333333333	4.77367977678419	5.79966666666667	4.84577445679025	0.214482761233133
Lcl-036	nsr- nis-	Lactococcus	lactis	cremoris	61	LA	1.98	0.82	8.209	15.971	7.76	4.69433333333333	11.2886666666667	6.9	1.09727377392506			0	0	0	0	0	0	0	0	0	4.35	5.62	A	10.2883333333333	6.29882974200321	5.89966666666667	6.25394147932446	0.926180928913007
Lcl-036	nsr- nis-	Lactococcus	lactis	cremoris	61	LA	1.98	0.82	8.209	15.971	7.76	4.69433333333333	11.2886666666667	6.9	1.09727377392506			0	0	0	0	0	0	0	0	0	4.35	5.62	A	10.2883333333333	4.74847899581892	5.89966666666667	4.82057367582498	0.201746097648437
Lcl-036	nsr- nis-	Lactococcus	lactis	cremoris	61	LA	1.98	0.82	8.209	15.971	7.76	4.69433333333333	11.2886666666667	6.9	1.09727377392506			0	0	0	0	0	0	0	0	0	4.35	5.62	A	10.3888333333333	6.28504509232148	6.00016666666667	6.24015682964273	0.919214063645178
Lcl-036	nsr- nis-	Lactococcus	lactis	cremoris	61	LA	1.98	0.82	8.209	15.971	7.76	4.69433333333333	11.2886666666667	6.9	1.09727377392506			0	0	0	0	0	0	0	0	0	4.35	5.62	A	10.3888333333333	4.73127691309871	6.00016666666667	4.80337159310477	0.193052036108619
Lcl-036	nsr- nis-	Lactococcus	lactis	cremoris	61	LA	1.98	0.82	8.209	15.971	7.76	4.69433333333333	11.2886666666667	6.9	1.09727377392506			0	0	0	0	0	0	0	0	0	4.35	5.62	A	10.4886666666667	6.28690138154217	6.1	6.24201311886343	0.920152246130571
Lcl-036	nsr- nis-	Lactococcus	lactis	cremoris	61	LA	1.98	0.82	8.209	15.971	7.76	4.69433333333333	11.2886666666667	6.9	1.09727377392506			0	0	0	0	0	0	0	0	0	4.35	5.62	A	10.4886666666667	4.7187810424125	6.1	4.79087572241856	0.186736529404784
Lcl-036	nsr- nis-	Lactococcus	lactis	cremoris	61	LA	1.98	0.82	8.209	15.971	7.76	4.69433333333333	11.2886666666667	6.9	1.09727377392506			0	0	0	0	0	0	0	0	0	4.35	5.62	A	10.5883333333333	6.27311673186044	6.19966666666667	6.22822846918169	0.913185380862742
Lcl-036	nsr- nis-	Lactococcus	lactis	cremoris	61	LA	1.98	0.82	8.209	15.971	7.76	4.69433333333333	11.2886666666667	6.9	1.09727377392506			0	0	0	0	0	0	0	0	0	4.35	5.62	A	10.5883333333333	4.70550620640049	6.19966666666667	4.77760088640655	0.180027327786786
Lcl-036	nsr- nis-	Lactococcus	lactis	cremoris	61	LA	1.98	0.82	8.209	15.971	7.76	4.69433333333333	11.2886666666667	6.9	1.09727377392506			0	0	0	0	0	0	0	0	0	4.35	5.62	A	10.6886666666667	6.26518963887539	6.3	6.22030137619665	0.909178968652965
Lcl-036	nsr- nis-	Lactococcus	lactis	cremoris	61	LA	1.98	0.82	8.209	15.971	7.76	4.69433333333333	11.2886666666667	6.9	1.09727377392506			0	0	0	0	0	0	0	0	0	4.35	5.62	A	10.6886666666667	4.68717575406994	6.3	4.759270434076	0.17076297978855
Lcl-036	nsr- nis-	Lactococcus	lactis	cremoris	61	LA	1.98	0.82	8.209	15.971	7.76	4.69433333333333	11.2886666666667	6.9	1.09727377392506			0	0	0	0	0	0	0	0	0	4.35	5.62	A	10.7886666666667	6.25726254589034	6.4	6.2123742832116	0.905172556443187
Lcl-036	nsr- nis-	Lactococcus	lactis	cremoris	61	LA	1.98	0.82	8.209	15.971	7.76	4.69433333333333	11.2886666666667	6.9	1.09727377392506			0	0	0	0	0	0	0	0	0	4.35	5.62	A	10.7886666666667	4.6684665092141	6.4	4.74056118922016	0.161307187208906
Lcl-036	nsr- nis-	Lactococcus	lactis	cremoris	61	LA	1.98	0.82	8.209	15.971	7.76	4.69433333333333	11.2886666666667	6.9	1.09727377392506			0	0	0	0	0	0	0	0	0	4.35	5.62	A	10.8886666666667	6.25726254589034	6.5	6.2123742832116	0.905172556443187
Lcl-036	nsr- nis-	Lactococcus	lactis	cremoris	61	LA	1.98	0.82	8.209	15.971	7.76	4.69433333333333	11.2886666666667	6.9	1.09727377392506			0	0	0	0	0	0	0	0	0	4.35	5.62	A	10.8886666666667	4.65834195339584	6.5	4.7304366334019	0.156190160812804
Lcl-036	nsr- nis-	Lactococcus	lactis	cremoris	61	LA	1.98	0.82	8.209	15.971	7.76	4.69433333333333	11.2886666666667	6.9	1.09727377392506			0	0	0	0	0	0	0	0	0	4.35	5.62	A	10.9886666666667	6.25091475757564	6.6	6.2060264948969	0.901964336651006
Lcl-036	nsr- nis-	Lactococcus	lactis	cremoris	61	LA	1.98	0.82	8.209	15.971	7.76	4.69433333333333	11.2886666666667	6.9	1.09727377392506			0	0	0	0	0	0	0	0	0	4.35	5.62	A	10.9886666666667	4.64301768779221	6.6	4.71511236779827	0.148445162118319
Lcl-036	nsr- nis-	Lactococcus	lactis	cremoris	61	LA	1.98	0.82	8.209	15.971	7.76	4.69433333333333	11.2886666666667	6.9	1.09727377392506			0	0	0	0	0	0	0	0	0	4.35	5.62	A	11.0886666666667	6.25091475757564	6.7	6.2060264948969	0.901964336651006
Lcl-036	nsr- nis-	Lactococcus	lactis	cremoris	61	LA	1.98	0.82	8.209	15.971	7.76	4.69433333333333	11.2886666666667	6.9	1.09727377392506			0	0	0	0	0	0	0	0	0	4.35	5.62	A	11.0886666666667	4.63796207147367	6.7	4.71005675147973	0.145890015738081
Lcl-036	nsr- nis-	Lactococcus	lactis	cremoris	61	LA	1.98	0.82	8.209	15.971	7.76	4.69433333333333	11.2886666666667	6.9	1.09727377392506			0	0	0	0	0	0	0	0	0	4.35	5.62	A	11.1886666666667	6.25249406224599	6.8	6.20760579956725	0.902762529068603
Lcl-036	nsr- nis-	Lactococcus	lactis	cremoris	61	LA	1.98	0.82	8.209	15.971	7.76	4.69433333333333	11.2886666666667	6.9	1.09727377392506			0	0	0	0	0	0	0	0	0	4.35	5.62	A	11.1886666666667	4.62147159559006	6.8	4.69356627559613	0.137555605627122
Lcl-036	nsr- nis-	Lactococcus	lactis	cremoris	61	LA	1.98	0.82	8.209	15.971	7.76	4.69433333333333	11.2886666666667	6.9	1.09727377392506			0	0	0	0	0	0	0	0	0	4.35	5.62	A	11.2886666666667	6.25407336691634	6.9	6.2091851042376	0.903560721486199
Lcl-036	nsr- nis-	Lactococcus	lactis	cremoris	61	LA	1.98	0.82	8.209	15.971	7.76	4.69433333333333	11.2886666666667	6.9	1.09727377392506			0	0	0	0	0	0	0	0	0	4.35	5.62	A	11.2886666666667	4.61393831623461	6.9	4.68603299624067	0.133748229777453
Lcl-036	nsr- nis-	Lactococcus	lactis	cremoris	61	LA	1.98	0.82	8.209	15.971	7.76	4.69433333333333	11.2886666666667	6.9	1.09727377392506			0	0	0	0	0	0	0	0	0	4.35	5.62	A	11.3883333333333	6.24622669944046	6.99966666666667	6.20133843676171	0.899594956931557
Lcl-036	nsr- nis-	Lactococcus	lactis	cremoris	61	LA	1.98	0.82	8.209	15.971	7.76	4.69433333333333	11.2886666666667	6.9	1.09727377392506			0	0	0	0	0	0	0	0	0	4.35	5.62	A	11.3883333333333	4.60873860644924	6.99966666666667	4.6808332864553	0.13112025747907
Lcl-036	nsr- nis-	Lactococcus	lactis	cremoris	61	LA	1.98	0.82	8.209	15.971	7.76	4.69433333333333	11.2886666666667	6.9	1.09727377392506			0	0	0	0	0	0	0	0	0	4.35	5.62	A	11.4883333333333	6.24622669944046	7.09966666666667	6.20133843676171	0.899594956931557
Lcl-036	nsr- nis-	Lactococcus	lactis	cremoris	61	LA	1.98	0.82	8.209	15.971	7.76	4.69433333333333	11.2886666666667	6.9	1.09727377392506			0	0	0	0	0	0	0	0	0	4.35	5.62	A	11.4883333333333	4.6034451591737104	7.09966666666667	4.6755398391797804	0.128444909550584
Lcl-036	nsr- nis-	Lactococcus	lactis	cremoris	61	LA	1.98	0.82	8.209	15.971	7.76	4.69433333333333	11.2886666666667	6.9	1.09727377392506			0	0	0	0	0	0	0	0	0	4.35	5.62	A	11.5883333333333	6.23994250352563	7.19966666666667	6.19505424084689	0.896418877214909
Lcl-036	nsr- nis-	Lactococcus	lactis	cremoris	61	LA	1.98	0.82	8.209	15.971	7.76	4.69433333333333	11.2886666666667	6.9	1.09727377392506			0	0	0	0	0	0	0	0	0	4.35	5.62	A	11.5883333333333	4.59002221301393	7.19966666666667	4.66211689301999	0.121660851953783
Lcl-036	nsr- nis-	Lactococcus	lactis	cremoris	61	LA	1.98	0.82	8.209	15.971	7.76	4.69433333333333	11.2886666666667	6.9	1.09727377392506			0	0	0	0	0	0	0	0	0	4.35	5.62	A	11.6883333333333	6.23207900294045	7.29966666666667	6.18719074026171	0.892444605080665
Lcl-036	nsr- nis-	Lactococcus	lactis	cremoris	61	LA	1.98	0.82	8.209	15.971	7.76	4.69433333333333	11.2886666666667	6.9	1.09727377392506			0	0	0	0	0	0	0	0	0	4.35	5.62	A	11.6883333333333	4.58770095465074	7.29966666666667	4.6597956346568	0.120487670578736
Lcl-036	nsr- nis-	Lactococcus	lactis	cremoris	61	LA	1.98	0.82	8.209	15.971	7.76	4.69433333333333	11.2886666666667	6.9	1.09727377392506			0	0	0	0	0	0	0	0	0	4.35	5.62	A	11.7883333333333	6.22421550235528	7.39966666666667	6.17932723967653	0.88847033294642
Lcl-036	nsr- nis-	Lactococcus	lactis	cremoris	61	LA	1.98	0.82	8.209	15.971	7.76	4.69433333333333	11.2886666666667	6.9	1.09727377392506			0	0	0	0	0	0	0	0	0	4.35	5.62	A	11.7883333333333	4.58231216656374	7.39966666666667	4.6544068465698	0.117764136689531
Lcl-036	nsr- nis-	Lactococcus	lactis	cremoris	61	LA	1.98	0.82	8.209	15.971	7.76	4.69433333333333	11.2886666666667	6.9	1.09727377392506			0	0	0	0	0	0	0	0	0	4.35	5.62	A	11.8883333333333	6.2273439338193	7.49966666666667	6.18245567114055	0.890051465656549
Lcl-036	nsr- nis-	Lactococcus	lactis	cremoris	61	LA	1.98	0.82	8.209	15.971	7.76	4.69433333333333	11.2886666666667	6.9	1.09727377392506			0	0	0	0	0	0	0	0	0	4.35	5.62	A	11.8883333333333	4.56850719618554	7.49966666666667	4.6406018761916	0.110787001189397
Lcl-036	nsr- nis-	Lactococcus	lactis	cremoris	61	LA	1.98	0.82	8.209	15.971	7.76	4.69433333333333	11.2886666666667	6.9	1.09727377392506			0	0	0	0	0	0	0	0	0	4.35	5.62	A	11.9883333333333	6.21948043323412	7.59966666666667	6.17459217055537	0.886077193522305
Lcl-036	nsr- nis-	Lactococcus	lactis	cremoris	61	LA	1.98	0.82	8.209	15.971	7.76	4.69433333333333	11.2886666666667	6.9	1.09727377392506			0	0	0	0	0	0	0	0	0	4.35	5.62	A	11.9883333333333	4.56311840809854	7.59966666666667	4.6352130881046	0.108063467300192
Lcl-036	nsr- nis-	Lactococcus	lactis	cremoris	61	LA	1.98	0.82	8.209	15.971	7.76	4.69433333333333	11.2886666666667	6.9	1.09727377392506			0	0	0	0	0	0	0	0	0	4.35	5.62	A	12.0883333333333	6.22104639313708	7.69966666666667	6.17615813045833	0.88686864139444
Lcl-036	nsr- nis-	Lactococcus	lactis	cremoris	61	LA	1.98	0.82	8.209	15.971	7.76	4.69433333333333	11.2886666666667	6.9	1.09727377392506			0	0	0	0	0	0	0	0	0	4.35	5.62	A	12.0883333333333	4.55460688499586	7.69966666666667	4.62670156500192	0.103761679728545
Lcl-036	nsr- nis-	Lactococcus	lactis	cremoris	61	LA	1.98	0.82	8.209	15.971	7.76	4.69433333333333	11.2886666666667	6.9	1.09727377392506			0	0	0	0	0	0	0	0	0	4.35	5.62	A	12.1883333333333	6.21481787128528	7.79966666666667	6.16992960860653	0.883720699766533
Lcl-036	nsr- nis-	Lactococcus	lactis	cremoris	61	LA	1.98	0.82	8.209	15.971	7.76	4.69433333333333	11.2886666666667	6.9	1.09727377392506			0	0	0	0	0	0	0	0	0	4.35	5.62	A	12.1883333333333	4.53785224895091	7.79966666666667	4.60994692895698	0.0952937610921106
Lcl-036	nsr- nis-	Lactococcus	lactis	cremoris	61	LA	1.98	0.82	8.209	15.971	7.76	4.69433333333333	11.2886666666667	6.9	1.09727377392506			0	0	0	0	0	0	0	0	0	4.35	5.62	A	12.2883333333333	6.21638383118824	7.89966666666667	6.17149556850949	0.884512147638669
Lcl-036	nsr- nis-	Lactococcus	lactis	cremoris	61	LA	1.98	0.82	8.209	15.971	7.76	4.69433333333333	11.2886666666667	6.9	1.09727377392506			0	0	0	0	0	0	0	0	0	4.35	5.62	A	12.2883333333333	4.53472951393524	7.89966666666667	4.6068241939413	0.0937155074096696
Lcl-036	nsr- nis-	Lactococcus	lactis	cremoris	61	LA	1.98	0.82	8.209	15.971	7.76	4.69433333333333	11.2886666666667	6.9	1.09727377392506			0	0	0	0	0	0	0	0	0	4.35	5.62	A	12.3883333333333	6.20858934943347	7.99966666666667	6.16370108675473	0.880572758138626
Lcl-036	nsr- nis-	Lactococcus	lactis	cremoris	61	LA	1.98	0.82	8.209	15.971	7.76	4.69433333333333	11.2886666666667	6.9	1.09727377392506			0	0	0	0	0	0	0	0	0	4.35	5.62	A	12.3883333333333	4.52918763414951	7.99966666666667	4.60128231415557	0.0909145998284757
Lcl-036	nsr- nis-	Lactococcus	lactis	cremoris	61	LA	1.98	0.82	8.209	15.971	7.76	4.69433333333333	11.2886666666667	6.9	1.09727377392506			0	0	0	0	0	0	0	0	0	4.35	5.62	A	12.4883333333333	6.20236082758167	8.09966666666667	6.15747256490293	0.877424816510719
Lcl-036	nsr- nis-	Lactococcus	lactis	cremoris	61	LA	1.98	0.82	8.209	15.971	7.76	4.69433333333333	11.2886666666667	6.9	1.09727377392506			0	0	0	0	0	0	0	0	0	4.35	5.62	A	12.4883333333333	4.52606489913383	8.09966666666667	4.5981595791399	0.0893363461460343
Lcl-036	nsr- nis-	Lactococcus	lactis	cremoris	61	LA	1.98	0.82	8.209	15.971	7.76	4.69433333333333	11.2886666666667	6.9	1.09727377392506			0	0	0	0	0	0	0	0	0	4.35	5.62	A	12.5886666666667	6.19585922188718	8.2	6.15097095920844	0.874138856261899
Lcl-036	nsr- nis-	Lactococcus	lactis	cremoris	61	LA	1.98	0.82	8.209	15.971	7.76	4.69433333333333	11.2886666666667	6.9	1.09727377392506			0	0	0	0	0	0	0	0	0	4.35	5.62	A	12.5886666666667	4.51569368691872	8.2	4.58778836692478	0.0840946577582208
Lcl-036	nsr- nis-	Lactococcus	lactis	cremoris	61	LA	1.98	0.82	8.209	15.971	7.76	4.69433333333333	11.2886666666667	6.9	1.09727377392506			0	0	0	0	0	0	0	0	0	4.35	5.62	A	12.6886666666667	6.19715209794745	8.3	6.1522638352687	0.87479228551312
Lcl-036	nsr- nis-	Lactococcus	lactis	cremoris	61	LA	1.98	0.82	8.209	15.971	7.76	4.69433333333333	11.2886666666667	6.9	1.09727377392506			0	0	0	0	0	0	0	0	0	4.35	5.62	A	12.6886666666667	4.52378370816226	8.3	4.59587838816832	0.0881834151310201
Lcl-036	nsr- nis-	Lactococcus	lactis	cremoris	61	LA	1.98	0.82	8.209	15.971	7.76	4.69433333333333	11.2886666666667	6.9	1.09727377392506			0	0	0	0	0	0	0	0	0	4.35	5.62	A	12.7886666666667	6.1829312706036	8.4	6.13804300792485	0.867604972785617
Lcl-036	nsr- nis-	Lactococcus	lactis	cremoris	61	LA	1.98	0.82	8.209	15.971	7.76	4.69433333333333	11.2886666666667	6.9	1.09727377392506			0	0	0	0	0	0	0	0	0	4.35	5.62	A	12.7886666666667	4.51824182837653	8.4	4.59033650838259	0.0853825075498261
Lcl-036	nsr- nis-	Lactococcus	lactis	cremoris	61	LA	1.98	0.82	8.209	15.971	7.76	4.69433333333333	11.2886666666667	6.9	1.09727377392506			0	0	0	0	0	0	0	0	0	4.35	5.62	A	12.8883333333333	6.17650492501451	8.49966666666667	6.13161666233576	0.864357049558156
Lcl-036	nsr- nis-	Lactococcus	lactis	cremoris	61	LA	1.98	0.82	8.209	15.971	7.76	4.69433333333333	11.2886666666667	6.9	1.09727377392506			0	0	0	0	0	0	0	0	0	4.35	5.62	A	12.8883333333333	4.51824182837653	8.49966666666667	4.59033650838259	0.0853825075498261
Lcl-036	nsr- nis-	Lactococcus	lactis	cremoris	61	LA	1.98	0.82	8.209	15.971	7.76	4.69433333333333	11.2886666666667	6.9	1.09727377392506			0	0	0	0	0	0	0	0	0	4.35	5.62	A	12.9883333333333	6.17007857942542	8.59966666666667	6.12519031674667	0.861109126330695
Lcl-036	nsr- nis-	Lactococcus	lactis	cremoris	61	LA	1.98	0.82	8.209	15.971	7.76	4.69433333333333	11.2886666666667	6.9	1.09727377392506			0	0	0	0	0	0	0	0	0	4.35	5.62	A	12.9883333333333	4.51269994859081	8.59966666666667	4.58479462859687	0.0825815999686327
Lcl-036	nsr- nis-	Lactococcus	lactis	cremoris	61	LA	1.98	0.82	8.209	15.971	7.76	4.69433333333333	11.2886666666667	6.9	1.09727377392506			0	0	0	0	0	0	0	0	0	4.35	5.62	A	13.0886666666667	6.1636395345616	8.7	6.11875127188286	0.857854784794607
Lcl-036	nsr- nis-	Lactococcus	lactis	cremoris	61	LA	1.98	0.82	8.209	15.971	7.76	4.69433333333333	11.2886666666667	6.9	1.09727377392506			0	0	0	0	0	0	0	0	0	4.35	5.62	A	13.0886666666667	4.5175292810202	8.7	4.58962396102626	0.0850223807752523
Lcl-036	nsr- nis-	Lactococcus	lactis	cremoris	61	LA	1.98	0.82	8.209	15.971	7.76	4.69433333333333	11.2886666666667	6.9	1.09727377392506			0	0	0	0	0	0	0	0	0	4.35	5.62	A	13.1886666666667	6.15057129884489	8.8	6.10568303616615	0.851250000514362
Lcl-036	nsr- nis-	Lactococcus	lactis	cremoris	61	LA	1.98	0.82	8.209	15.971	7.76	4.69433333333333	11.2886666666667	6.9	1.09727377392506			0	0	0	0	0	0	0	0	0	4.35	5.62	A	13.1886666666667	4.50448575247272	8.8	4.57658043247878	0.0784300836835218
Lcl-036	nsr- nis-	Lactococcus	lactis	cremoris	61	LA	1.98	0.82	8.209	15.971	7.76	4.69433333333333	11.2886666666667	6.9	1.09727377392506			0	0	0	0	0	0	0	0	0	4.35	5.62	A	13.2886666666667	6.15185147563044	8.9	6.10696321295169	0.851897011456956
Lcl-036	nsr- nis-	Lactococcus	lactis	cremoris	61	LA	1.98	0.82	8.209	15.971	7.76	4.69433333333333	11.2886666666667	6.9	1.09727377392506			0	0	0	0	0	0	0	0	0	4.35	5.62	A	13.2886666666667	4.49965642004332	8.9	4.57175110004938	0.0759893028769022
Lcl-036	nsr- nis-	Lactococcus	lactis	cremoris	61	LA	1.98	0.82	8.209	15.971	7.76	4.69433333333333	11.2886666666667	6.9	1.09727377392506			0	0	0	0	0	0	0	0	0	4.35	5.62	A	13.3886666666667	6.15441437831737	9	6.10952611563863	0.853192321684398
Lcl-036	nsr- nis-	Lactococcus	lactis	cremoris	61	LA	1.98	0.82	8.209	15.971	7.76	4.69433333333333	11.2886666666667	6.9	1.09727377392506			0	0	0	0	0	0	0	0	0	4.35	5.62	A	13.3886666666667	4.48242703240404	9	4.5545217124101	0.0672814412263321
Lcl-036	nsr- nis-	Lactococcus	lactis	cremoris	61	LA	1.98	0.82	8.209	15.971	7.76	4.69433333333333	11.2886666666667	6.9	1.09727377392506			0	0	0	0	0	0	0	0	0	4.35	5.62	A	13.4886666666667	6.14906536425002	9.1	6.10417710157127	0.850488889882835
Lcl-036	nsr- nis-	Lactococcus	lactis	cremoris	61	LA	1.98	0.82	8.209	15.971	7.76	4.69433333333333	11.2886666666667	6.9	1.09727377392506			0	0	0	0	0	0	0	0	0	4.35	5.62	A	13.4886666666667	4.48242703240404	9.1	4.5545217124101	0.0672814412263321
Lcl-036	nsr- nis-	Lactococcus	lactis	cremoris	61	LA	1.98	0.82	8.209	15.971	7.76	4.69433333333333	11.2886666666667	6.9	1.09727377392506			0	0	0	0	0	0	0	0	0	4.35	5.62	A	13.5883333333333	6.14243617339712	9.19966666666667	6.09754791071837	0.847138447138678
Lcl-036	nsr- nis-	Lactococcus	lactis	cremoris	61	LA	1.98	0.82	8.209	15.971	7.76	4.69433333333333	11.2886666666667	6.9	1.09727377392506			0	0	0	0	0	0	0	0	0	4.35	5.62	A	13.5883333333333	4.46519764476476	9.19966666666667	4.53729232477082	0.0585735795757624
Lcl-036	nsr- nis-	Lactococcus	lactis	cremoris	61	LA	1.98	0.82	8.209	15.971	7.76	4.69433333333333	11.2886666666667	6.9	1.09727377392506			0	0	0	0	0	0	0	0	0	4.35	5.62	A	13.6886666666667	6.14243617339712	9.3	6.09754791071837	0.847138447138678
Lcl-036	nsr- nis-	Lactococcus	lactis	cremoris	61	LA	1.98	0.82	8.209	15.971	7.76	4.69433333333333	11.2886666666667	6.9	1.09727377392506			0	0	0	0	0	0	0	0	0	4.35	5.62	A	13.6886666666667	4.46519764476476	9.3	4.53729232477082	0.0585735795757624
Lcl-036	nsr- nis-	Lactococcus	lactis	cremoris	61	LA	1.98	0.82	8.209	15.971	7.76	4.69433333333333	11.2886666666667	6.9	1.09727377392506			0	0	0	0	0	0	0	0	0	4.35	5.62	A	13.7886666666667	6.13580698254422	9.4	6.09091871986547	0.843788004394522
Lcl-036	nsr- nis-	Lactococcus	lactis	cremoris	61	LA	1.98	0.82	8.209	15.971	7.76	4.69433333333333	11.2886666666667	6.9	1.09727377392506			0	0	0	0	0	0	0	0	0	4.35	5.62	A	13.7886666666667	4.45698344864667	9.4	4.52907812865273	0.0544220632906521
Lcl-036	nsr- nis-	Lactococcus	lactis	cremoris	61	LA	1.98	0.82	8.209	15.971	7.76	4.69433333333333	11.2886666666667	6.9	1.09727377392506			0	0	0	0	0	0	0	0	0	4.35	5.62	A	13.8886666666667	6.12133331899876	9.5	6.07644505632001	0.836472906355668
Lcl-036	nsr- nis-	Lactococcus	lactis	cremoris	61	LA	1.98	0.82	8.209	15.971	7.76	4.69433333333333	11.2886666666667	6.9	1.09727377392506			0	0	0	0	0	0	0	0	0	4.35	5.62	A	13.8886666666667	4.46116930773847	9.5	4.53326398774453	0.0565376278494913
Lcl-036	nsr- nis-	Lactococcus	lactis	cremoris	61	LA	1.98	0.82	8.209	15.971	7.76	4.69433333333333	11.2886666666667	6.9	1.09727377392506			0	0	0	0	0	0	0	0	0	4.35	5.62	A	13.9886666666667	6.11477157220759	9.6	6.06988330952884	0.833156550345817
Lcl-036	nsr- nis-	Lactococcus	lactis	cremoris	61	LA	1.98	0.82	8.209	15.971	7.76	4.69433333333333	11.2886666666667	6.9	1.09727377392506			0	0	0	0	0	0	0	0	0	4.35	5.62	A	13.9886666666667	4.44393992009919	9.6	4.51603460010525	0.0478297661989216
Lcl-036	nsr- nis-	Lactococcus	lactis	cremoris	61	LA	1.98	0.82	8.209	15.971	7.76	4.69433333333333	11.2886666666667	6.9	1.09727377392506			0	0	0	0	0	0	0	0	0	4.35	5.62	A	14.0883333333333	6.10820982541642	9.69966666666667	6.06332156273767	0.829840194335967
Lcl-036	nsr- nis-	Lactococcus	lactis	cremoris	61	LA	1.98	0.82	8.209	15.971	7.76	4.69433333333333	11.2886666666667	6.9	1.09727377392506			0	0	0	0	0	0	0	0	0	4.35	5.62	A	14.0883333333333	4.44393992009919	9.69966666666667	4.51603460010525	0.0478297661989216
Lcl-036	nsr- nis-	Lactococcus	lactis	cremoris	61	LA	1.98	0.82	8.209	15.971	7.76	4.69433333333333	11.2886666666667	6.9	1.09727377392506			0	0	0	0	0	0	0	0	0	4.35	5.62	A	14.1883333333333	6.10265330987115	9.79966666666667	6.05776504719241	0.827031889732204
Lcl-036	nsr- nis-	Lactococcus	lactis	cremoris	61	LA	1.98	0.82	8.209	15.971	7.76	4.69433333333333	11.2886666666667	6.9	1.09727377392506			0	0	0	0	0	0	0	0	0	4.35	5.62	A	14.1883333333333	4.44393992009919	9.79966666666667	4.51603460010525	0.0478297661989216
Lcl-036	nsr- nis-	Lactococcus	lactis	cremoris	61	LA	1.98	0.82	8.209	15.971	7.76	4.69433333333333	11.2886666666667	6.9	1.09727377392506			0	0	0	0	0	0	0	0	0	4.35	5.62	A	14.2883333333333	6.09034021640909	9.89966666666666	6.04545195373034	0.820808760007399
Lcl-036	nsr- nis-	Lactococcus	lactis	cremoris	61	LA	1.98	0.82	8.209	15.971	7.76	4.69433333333333	11.2886666666667	6.9	1.09727377392506			0	0	0	0	0	0	0	0	0	4.35	5.62	A	14.2883333333333	4.44393992009919	9.89966666666666	4.51603460010525	0.0478297661989216
Lcl-036	nsr- nis-	Lactococcus	lactis	cremoris	61	LA	1.98	0.82	8.209	15.971	7.76	4.69433333333333	11.2886666666667	6.9	1.09727377392506			0	0	0	0	0	0	0	0	0	4.35	5.62	A	14.3883333333333	6.07715494420309	9.99966666666667	6.03226668152435	0.81414482460826
Lcl-036	nsr- nis-	Lactococcus	lactis	cremoris	61	LA	1.98	0.82	8.209	15.971	7.76	4.69433333333333	11.2886666666667	6.9	1.09727377392506			0	0	0	0	0	0	0	0	0	4.35	5.62	A	14.3883333333333	4.44393992009919	9.99966666666667	4.51603460010525	0.0478297661989216
Lcl-036	nsr- nis-	Lactococcus	lactis	cremoris	61	LA	1.98	0.82	8.209	15.971	7.76	4.69433333333333	11.2886666666667	6.9	1.09727377392506			0	0	0	0	0	0	0	0	0	4.35	5.62	A	14.4886666666667	6.0639696719971	10.1	6.01908140931835	0.807480889209121
Lcl-036	nsr- nis-	Lactococcus	lactis	cremoris	61	LA	1.98	0.82	8.209	15.971	7.76	4.69433333333333	11.2886666666667	6.9	1.09727377392506			0	0	0	0	0	0	0	0	0	4.35	5.62	A	14.4886666666667	4.44309636935918	10.1	4.51519104936524	0.0474034293323384
Lcl-036	nsr- nis-	Lactococcus	lactis	cremoris	61	LA	1.98	0.82	8.209	15.971	7.76	4.69433333333333	11.2886666666667	6.9	1.09727377392506			0	0	0	0	0	0	0	0	0	4.35	5.62	A	14.5886666666667	6.05078439979111	10.2	6.00589613711236	0.800816953809982
Lcl-036	nsr- nis-	Lactococcus	lactis	cremoris	61	LA	1.98	0.82	8.209	15.971	7.76	4.69433333333333	11.2886666666667	6.9	1.09727377392506			0	0	0	0	0	0	0	0	0	4.35	5.62	A	14.5886666666667	4.43800290049865	10.2	4.51009758050471	0.0448291519936698
Lcl-036	nsr- nis-	Lactococcus	lactis	cremoris	61	LA	1.98	0.82	8.209	15.971	7.76	4.69433333333333	11.2886666666667	6.9	1.09727377392506			0	0	0	0	0	0	0	0	0	4.35	5.62	A	14.6888333333333	6.03733413871337	10.3001666666667	5.99244587603463	0.794019091048922
Lcl-036	nsr- nis-	Lactococcus	lactis	cremoris	61	LA	1.98	0.82	8.209	15.971	7.76	4.69433333333333	11.2886666666667	6.9	1.09727377392506			0	0	0	0	0	0	0	0	0	4.35	5.62	A	14.6888333333333	4.43800290049865	10.3001666666667	4.51009758050471	0.0448291519936698
Lcl-036	nsr- nis-	Lactococcus	lactis	cremoris	61	LA	1.98	0.82	8.209	15.971	7.76	4.69433333333333	11.2886666666667	6.9	1.09727377392506			0	0	0	0	0	0	0	0	0	4.35	5.62	A	14.7883333333333	6.02990021317828	10.3996666666667	5.98501195049953	0.790261929364738
Lcl-036	nsr- nis-	Lactococcus	lactis	cremoris	61	LA	1.98	0.82	8.209	15.971	7.76	4.69433333333333	11.2886666666667	6.9	1.09727377392506			0	0	0	0	0	0	0	0	0	4.35	5.62	A	14.7883333333333	4.42872357254633	10.3996666666667	4.50081825255239	0.0401393100961616
Lcl-036	nsr- nis-	Lactococcus	lactis	cremoris	61	LA	1.98	0.82	8.209	15.971	7.76	4.69433333333333	11.2886666666667	6.9	1.09727377392506			0	0	0	0	0	0	0	0	0	4.35	5.62	A	14.8883333333333	6.03064045555244	10.4996666666667	5.9857521928737	0.790636053408904
Lcl-036	nsr- nis-	Lactococcus	lactis	cremoris	61	LA	1.98	0.82	8.209	15.971	7.76	4.69433333333333	11.2886666666667	6.9	1.09727377392506			0	0	0	0	0	0	0	0	0	4.35	5.62	A	14.8883333333333	4.41427293055792	10.4996666666667	4.48636761056398	0.0328358473247922
Lcl-036	nsr- nis-	Lactococcus	lactis	cremoris	61	LA	1.98	0.82	8.209	15.971	7.76	4.69433333333333	11.2886666666667	6.9	1.09727377392506			0	0	0	0	0	0	0	0	0	4.35	5.62	A	14.9883333333333	6.02400546712349	10.5996666666667	5.97911720444474	0.787282680526356
Lcl-036	nsr- nis-	Lactococcus	lactis	cremoris	61	LA	1.98	0.82	8.209	15.971	7.76	4.69433333333333	11.2886666666667	6.9	1.09727377392506			0	0	0	0	0	0	0	0	0	4.35	5.62	A	14.9883333333333	4.41930234038973	10.5996666666667	4.49139702039579	0.0353777487502147
Lcl-036	nsr- nis-	Lactococcus	lactis	cremoris	61	LA	1.98	0.82	8.209	15.971	7.76	4.69433333333333	11.2886666666667	6.9	1.09727377392506			0	0	0	0	0	0	0	0	0	4.35	5.62	A	15.0883333333333	6.01737047869453	10.6996666666667	5.97248221601579	0.783929307643809
Lcl-036	nsr- nis-	Lactococcus	lactis	cremoris	61	LA	1.98	0.82	8.209	15.971	7.76	4.69433333333333	11.2886666666667	6.9	1.09727377392506			0	0	0	0	0	0	0	0	0	4.35	5.62	A	15.0883333333333	4.41930234038973	10.6996666666667	4.49139702039579	0.0353777487502147
Lcl-036	nsr- nis-	Lactococcus	lactis	cremoris	61	LA	1.98	0.82	8.209	15.971	7.76	4.69433333333333	11.2886666666667	6.9	1.09727377392506			0	0	0	0	0	0	0	0	0	4.35	5.62	A	15.1883333333333	6.01073025662832	10.7996666666667	5.96584199394958	0.780573289641765
Lcl-036	nsr- nis-	Lactococcus	lactis	cremoris	61	LA	1.98	0.82	8.209	15.971	7.76	4.69433333333333	11.2886666666667	6.9	1.09727377392506			0	0	0	0	0	0	0	0	0	4.35	5.62	A	15.1883333333333	4.41002301243741	10.7996666666667	4.48211769244347	0.0306879068527065
Lcl-036	nsr- nis-	Lactococcus	lactis	cremoris	61	LA	1.98	0.82	8.209	15.971	7.76	4.69433333333333	11.2886666666667	6.9	1.09727377392506			0	0	0	0	0	0	0	0	0	4.35	5.62	A	15.2883333333333	5.99798741669337	10.8996666666667	5.95309915401463	0.774132962828528
Lcl-036	nsr- nis-	Lactococcus	lactis	cremoris	61	LA	1.98	0.82	8.209	15.971	7.76	4.69433333333333	11.2886666666667	6.9	1.09727377392506			0	0	0	0	0	0	0	0	0	4.35	5.62	A	15.2883333333333	4.41002301243741	10.8996666666667	4.48211769244347	0.0306879068527065
Lcl-036	nsr- nis-	Lactococcus	lactis	cremoris	61	LA	1.98	0.82	8.209	15.971	7.76	4.69433333333333	11.2886666666667	6.9	1.09727377392506			0	0	0	0	0	0	0	0	0	4.35	5.62	A	15.3883333333333	5.97768877426442	10.9996666666667	5.93280051158568	0.763873876802588
Lcl-036	nsr- nis-	Lactococcus	lactis	cremoris	61	LA	1.98	0.82	8.209	15.971	7.76	4.69433333333333	11.2886666666667	6.9	1.09727377392506			0	0	0	0	0	0	0	0	0	4.35	5.62	A	15.3883333333333	4.41519432647349	10.9996666666667	4.48728900647955	0.033301527726568
Lcl-036	nsr- nis-	Lactococcus	lactis	cremoris	61	LA	1.98	0.82	8.209	15.971	7.76	4.69433333333333	11.2886666666667	6.9	1.09727377392506			0	0	0	0	0	0	0	0	0	4.35	5.62	A	15.4883333333333	5.9647653626386	11.0996666666667	5.91987709995985	0.757342287703362
Lcl-036	nsr- nis-	Lactococcus	lactis	cremoris	61	LA	1.98	0.82	8.209	15.971	7.76	4.69433333333333	11.2886666666667	6.9	1.09727377392506			0	0	0	0	0	0	0	0	0	4.35	5.62	A	15.4883333333333	4.39194893050724	11.0996666666667	4.4640436105133	0.0215531303763723
Lcl-036	nsr- nis-	Lactococcus	lactis	cremoris	61	LA	1.98	0.82	8.209	15.971	7.76	4.69433333333333	11.2886666666667	6.9	1.09727377392506			0	0	0	0	0	0	0	0	0	4.35	5.62	A	15.5883333333333	5.95184195101277	11.1996666666667	5.90695368833402	0.750810698604135
Lcl-036	nsr- nis-	Lactococcus	lactis	cremoris	61	LA	1.98	0.82	8.209	15.971	7.76	4.69433333333333	11.2886666666667	6.9	1.09727377392506			0	0	0	0	0	0	0	0	0	4.35	5.62	A	15.5883333333333	4.39194893050724	11.1996666666667	4.4640436105133	0.0215531303763723
Lcl-036	nsr- nis-	Lactococcus	lactis	cremoris	61	LA	1.98	0.82	8.209	15.971	7.76	4.69433333333333	11.2886666666667	6.9	1.09727377392506			0	0	0	0	0	0	0	0	0	4.35	5.62	A	15.6886666666667	5.93818353065003	11.3	5.89329526797129	0.743907630580239
Lcl-036	nsr- nis-	Lactococcus	lactis	cremoris	61	LA	1.98	0.82	8.209	15.971	7.76	4.69433333333333	11.2886666666667	6.9	1.09727377392506			0	0	0	0	0	0	0	0	0	4.35	5.62	A	15.6886666666667	4.37798286249331	11.3	4.45007754249937	0.0144945749236848
Lcl-036	nsr- nis-	Lactococcus	lactis	cremoris	61	LA	1.98	0.82	8.209	15.971	7.76	4.69433333333333	11.2886666666667	6.9	1.09727377392506			0	0	0	0	0	0	0	0	0	4.35	5.62	A	15.7886666666667	5.93161113209066	11.4	5.88672286941192	0.740585891086904
Lcl-036	nsr- nis-	Lactococcus	lactis	cremoris	61	LA	1.98	0.82	8.209	15.971	7.76	4.69433333333333	11.2886666666667	6.9	1.09727377392506			0	0	0	0	0	0	0	0	0	4.35	5.62	A	15.7886666666667	4.37798286249331	11.4	4.45007754249937	0.0144945749236848
Lcl-036	nsr- nis-	Lactococcus	lactis	cremoris	61	LA	1.98	0.82	8.209	15.971	7.76	4.69433333333333	11.2886666666667	6.9	1.09727377392506			0	0	0	0	0	0	0	0	0	4.35	5.62	A	15.8883333333333	5.92528918361973	11.4996666666667	5.88040092094098	0.737390730945435
Lcl-036	nsr- nis-	Lactococcus	lactis	cremoris	61	LA	1.98	0.82	8.209	15.971	7.76	4.69433333333333	11.2886666666667	6.9	1.09727377392506			0	0	0	0	0	0	0	0	0	4.35	5.62	A	15.8883333333333	4.36844188364676	11.4996666666667	4.44053656365282	0.00967249270310728
Lcl-036	nsr- nis-	Lactococcus	lactis	cremoris	61	LA	1.98	0.82	8.209	15.971	7.76	4.69433333333333	11.2886666666667	6.9	1.09727377392506			0	0	0	0	0	0	0	0	0	4.35	5.62	A	15.9883333333333	5.91896723514879	11.5996666666667	5.87407897247005	0.734195570803968
Lcl-036	nsr- nis-	Lactococcus	lactis	cremoris	61	LA	1.98	0.82	8.209	15.971	7.76	4.69433333333333	11.2886666666667	6.9	1.09727377392506			0	0	0	0	0	0	0	0	0	4.35	5.62	A	15.9883333333333	4.37286697281413	11.5996666666667	4.44496165282019	0.0119089659352168
Lcl-036	nsr- nis-	Lactococcus	lactis	cremoris	61	LA	1.98	0.82	8.209	15.971	7.76	4.69433333333333	11.2886666666667	6.9	1.09727377392506			0	0	0	0	0	0	0	0	0	4.35	5.62	A	16.0883333333333	5.91264528667786	11.6996666666667	5.86775702399911	0.731000410662499
Lcl-036	nsr- nis-	Lactococcus	lactis	cremoris	61	LA	1.98	0.82	8.209	15.971	7.76	4.69433333333333	11.2886666666667	6.9	1.09727377392506			0	0	0	0	0	0	0	0	0	4.35	5.62	A	16.0883333333333	4.37286697281413	11.6996666666667	4.44496165282019	0.0119089659352168
Lcl-036	nsr- nis-	Lactococcus	lactis	cremoris	61	LA	1.98	0.82	8.209	15.971	7.76	4.69433333333333	11.2886666666667	6.9	1.09727377392506			0	0	0	0	0	0	0	0	0	4.35	5.62	A	16.1883333333333	5.89998871652726	11.7996666666667	5.85510045384851	0.724603685244883
Lcl-036	nsr- nis-	Lactococcus	lactis	cremoris	61	LA	1.98	0.82	8.209	15.971	7.76	4.69433333333333	11.2886666666667	6.9	1.09727377392506			0	0	0	0	0	0	0	0	0	4.35	5.62	A	16.1883333333333	4.3772920619815	11.7996666666667	4.44938674198756	0.0141454391673264
Lcl-036	nsr- nis-	Lactococcus	lactis	cremoris	61	LA	1.98	0.82	8.209	15.971	7.76	4.69433333333333	11.2886666666667	6.9	1.09727377392506			0	0	0	0	0	0	0	0	0	4.35	5.62	A	16.2883333333333	5.8807204572688	11.8996666666667	5.83583219459006	0.714865362596236
Lcl-036	nsr- nis-	Lactococcus	lactis	cremoris	61	LA	1.98	0.82	8.209	15.971	7.76	4.69433333333333	11.2886666666667	6.9	1.09727377392506			0	0	0	0	0	0	0	0	0	4.35	5.62	A	16.2883333333333	4.36332599396757	11.8996666666667	4.43542067397363	0.00708688371463887
Lcl-036	nsr- nis-	Lactococcus	lactis	cremoris	61	LA	1.98	0.82	8.209	15.971	7.76	4.69433333333333	11.2886666666667	6.9	1.09727377392506			0	0	0	0	0	0	0	0	0	4.35	5.62	A	16.3883333333333	5.86801730804174	11.9996666666667	5.823129045363	0.708445095764257
Lcl-036	nsr- nis-	Lactococcus	lactis	cremoris	61	LA	1.98	0.82	8.209	15.971	7.76	4.69433333333333	11.2886666666667	6.9	1.09727377392506			0	0	0	0	0	0	0	0	0	4.35	5.62	A	16.3883333333333	4.37286697281413	11.9996666666667	4.44496165282019	0.0119089659352168
Lcl-036	nsr- nis-	Lactococcus	lactis	cremoris	61	LA	1.98	0.82	8.209	15.971	7.76	4.69433333333333	11.2886666666667	6.9	1.09727377392506			0	0	0	0	0	0	0	0	0	4.35	5.62	A	16.4883333333333	5.85506822487958	12.0996666666667	5.81017996220084	0.701900532078155
Lcl-036	nsr- nis-	Lactococcus	lactis	cremoris	61	LA	1.98	0.82	8.209	15.971	7.76	4.69433333333333	11.2886666666667	6.9	1.09727377392506			0	0	0	0	0	0	0	0	0	4.35	5.62	A	16.4883333333333	4.37286697281413	12.0996666666667	4.44496165282019	0.0119089659352168
Lcl-036	nsr- nis-	Lactococcus	lactis	cremoris	61	LA	1.98	0.82	8.209	15.971	7.76	4.69433333333333	11.2886666666667	6.9	1.09727377392506			0	0	0	0	0	0	0	0	0	4.35	5.62	A	16.5888333333333	5.83618748385079	12.2001666666667	5.79129922117204	0.692358064047303
Lcl-036	nsr- nis-	Lactococcus	lactis	cremoris	61	LA	1.98	0.82	8.209	15.971	7.76	4.69433333333333	11.2886666666667	6.9	1.09727377392506			0	0	0	0	0	0	0	0	0	4.35	5.62	A	16.5888333333333	4.3589009048002	12.2001666666667	4.43099558480626	0.00485041048252933
Lcl-036	nsr- nis-	Lactococcus	lactis	cremoris	61	LA	1.98	0.82	8.209	15.971	7.76	4.69433333333333	11.2886666666667	6.9	1.09727377392506			0	0	0	0	0	0	0	0	0	4.35	5.62	A	16.6883333333333	5.82314417680741	12.2996666666667	5.77825591412866	0.685765878905408
Lcl-036	nsr- nis-	Lactococcus	lactis	cremoris	61	LA	1.98	0.82	8.209	15.971	7.76	4.69433333333333	11.2886666666667	6.9	1.09727377392506			0	0	0	0	0	0	0	0	0	4.35	5.62	A	16.6883333333333	4.36327056961067	12.2996666666667	4.43536524961673	0.00705887182924574
Lcl-036	nsr- nis-	Lactococcus	lactis	cremoris	61	LA	1.98	0.82	8.209	15.971	7.76	4.69433333333333	11.2886666666667	6.9	1.09727377392506			0	0	0	0	0	0	0	0	0	4.35	5.62	A	16.7883333333333	5.81646939731143	12.3996666666667	5.77158113463268	0.682392395319342
Lcl-036	nsr- nis-	Lactococcus	lactis	cremoris	61	LA	1.98	0.82	8.209	15.971	7.76	4.69433333333333	11.2886666666667	6.9	1.09727377392506			0	0	0	0	0	0	0	0	0	4.35	5.62	A	16.7883333333333	4.36769565877804	12.3996666666667	4.4397903387841	0.00929534506135529
Lcl-036	nsr- nis-	Lactococcus	lactis	cremoris	61	LA	1.98	0.82	8.209	15.971	7.76	4.69433333333333	11.2886666666667	6.9	1.09727377392506			0	0	0	0	0	0	0	0	0	4.35	5.62	A	16.8883333333333	5.80979461781544	12.4996666666667	5.7649063551367	0.679018911733277
Lcl-036	nsr- nis-	Lactococcus	lactis	cremoris	61	LA	1.98	0.82	8.209	15.971	7.76	4.69433333333333	11.2886666666667	6.9	1.09727377392506			0	0	0	0	0	0	0	0	0	4.35	5.62	A	16.8883333333333	4.36252434474196	12.4996666666667	4.43461902474802	0.00668172418749375
Lcl-036	nsr- nis-	Lactococcus	lactis	cremoris	61	LA	1.98	0.82	8.209	15.971	7.76	4.69433333333333	11.2886666666667	6.9	1.09727377392506			0	0	0	0	0	0	0	0	0	4.35	5.62	A	16.9883333333333	5.79073948661475	12.5996666666667	5.745851223936	0.669388305602457
Lcl-036	nsr- nis-	Lactococcus	lactis	cremoris	61	LA	1.98	0.82	8.209	15.971	7.76	4.69433333333333	11.2886666666667	6.9	1.09727377392506			0	0	0	0	0	0	0	0	0	4.35	5.62	A	16.9883333333333	4.36252434474196	12.5996666666667	4.43461902474802	0.00668172418749375
Lcl-036	nsr- nis-	Lactococcus	lactis	cremoris	61	LA	1.98	0.82	8.209	15.971	7.76	4.69433333333333	11.2886666666667	6.9	1.09727377392506			0	0	0	0	0	0	0	0	0	4.35	5.62	A	17.0888333333333	5.77761601328068	12.7001666666667	5.73272775060194	0.662755603816387
Lcl-036	nsr- nis-	Lactococcus	lactis	cremoris	61	LA	1.98	0.82	8.209	15.971	7.76	4.69433333333333	11.2886666666667	6.9	1.09727377392506			0	0	0	0	0	0	0	0	0	4.35	5.62	A	17.0888333333333	4.35804320523457	12.7001666666667	4.43013788524064	0.00441692269343284
Lcl-036	nsr- nis-	Lactococcus	lactis	cremoris	61	LA	1.98	0.82	8.209	15.971	7.76	4.69433333333333	11.2886666666667	6.9	1.09727377392506			0	0	0	0	0	0	0	0	0	4.35	5.62	A	17.1883333333333	5.75875597023722	12.7996666666667	5.71386770755847	0.653223596702456
Lcl-036	nsr- nis-	Lactococcus	lactis	cremoris	61	LA	1.98	0.82	8.209	15.971	7.76	4.69433333333333	11.2886666666667	6.9	1.09727377392506			0	0	0	0	0	0	0	0	0	4.35	5.62	A	17.1883333333333	4.3536735404241	12.7996666666667	4.42576822043016	0.00220846134671642
Lcl-036	nsr- nis-	Lactococcus	lactis	cremoris	61	LA	1.98	0.82	8.209	15.971	7.76	4.69433333333333	11.2886666666667	6.9	1.09727377392506			0	0	0	0	0	0	0	0	0	4.35	5.62	A	17.2886666666667	5.73989592719375	12.9	5.695007664515	0.643691589588525
Lcl-036	nsr- nis-	Lactococcus	lactis	cremoris	61	LA	1.98	0.82	8.209	15.971	7.76	4.69433333333333	11.2886666666667	6.9	1.09727377392506			0	0	0	0	0	0	0	0	0	4.35	5.62	A	17.2886666666667	4.3536735404241	12.9	4.42576822043016	0.00220846134671642
Lcl-036	nsr- nis-	Lactococcus	lactis	cremoris	61	LA	1.98	0.82	8.209	15.971	7.76	4.69433333333333	11.2886666666667	6.9	1.09727377392506			0	0	0	0	0	0	0	0	0	4.35	5.62	A	17.3886666666667	5.71492397239502	13	5.67003570971627	0.631070576463494
Lcl-036	nsr- nis-	Lactococcus	lactis	cremoris	61	LA	1.98	0.82	8.209	15.971	7.76	4.69433333333333	11.2886666666667	6.9	1.09727377392506			0	0	0	0	0	0	0	0	0	4.35	5.62	A	17.3886666666667	4.34930387561363	13	4.42139855561969	0
Lcl-036	nsr- nis-	Lactococcus	lactis	cremoris	61	LA	1.98	0.82	8.209	15.971	7.76	4.69433333333333	11.2886666666667	6.9	1.09727377392506			0	0	0	0	0	0	0	0	0	4.35	5.62	A	17.4883333333333	5.70257830323611	13.0996666666667	5.65769004055736	0.624830982737341
Lcl-036	nsr- nis-	Lactococcus	lactis	cremoris	61	LA	1.98	0.82	8.209	15.971	7.76	4.69433333333333	11.2886666666667	6.9	1.09727377392506			0	0	0	0	0	0	0	0	0	4.35	5.62	A	17.4883333333333	4.3536735404241	13.0996666666667	4.42576822043016	0.00220846134671642
Lcl-036	nsr- nis-	Lactococcus	lactis	cremoris	61	LA	1.98	0.82	8.209	15.971	7.76	4.69433333333333	11.2886666666667	6.9	1.09727377392506			0	0	0	0	0	0	0	0	0	4.35	5.62	A	17.5883333333333	5.67807258150506	13.1996666666667	5.63318431882631	0.612445607299223
Lcl-036	nsr- nis-	Lactococcus	lactis	cremoris	61	LA	1.98	0.82	8.209	15.971	7.76	4.69433333333333	11.2886666666667	6.9	1.09727377392506			0	0	0	0	0	0	0	0	0	4.35	5.62	A	17.5883333333333	4.35815467993149	13.1996666666667	4.43024935993755	0.00447326284077733
Lcl-036	nsr- nis-	Lactococcus	lactis	cremoris	61	LA	1.98	0.82	8.209	15.971	7.76	4.69433333333333	11.2886666666667	6.9	1.09727377392506			0	0	0	0	0	0	0	0	0	4.35	5.62	A	17.6886666666667	5.65980061717765	13.3	5.61491235449891	0.603210819576158
Lcl-036	nsr- nis-	Lactococcus	lactis	cremoris	61	LA	1.98	0.82	8.209	15.971	7.76	4.69433333333333	11.2886666666667	6.9	1.09727377392506			0	0	0	0	0	0	0	0	0	4.35	5.62	A	17.6886666666667	4.35815467993149	13.3	4.43024935993755	0.00447326284077733
Lcl-036	nsr- nis-	Lactococcus	lactis	cremoris	61	LA	1.98	0.82	8.209	15.971	7.76	4.69433333333333	11.2886666666667	6.9	1.09727377392506			0	0	0	0	0	0	0	0	0	4.35	5.62	A	17.7886666666667	5.63546438324943	13.4	5.59057612057069	0.590911104543936
Lcl-036	nsr- nis-	Lactococcus	lactis	cremoris	61	LA	1.98	0.82	8.209	15.971	7.76	4.69433333333333	11.2886666666667	6.9	1.09727377392506			0	0	0	0	0	0	0	0	0	4.35	5.62	A	17.7886666666667	4.36252434474196	13.4	4.43461902474802	0.00668172418749375
Lcl-036	nsr- nis-	Lactococcus	lactis	cremoris	61	LA	1.98	0.82	8.209	15.971	7.76	4.69433333333333	11.2886666666667	6.9	1.09727377392506			0	0	0	0	0	0	0	0	0	4.35	5.62	A	17.8883333333333	5.62482827642012	13.4996666666667	5.57994001374138	0.585535536432673
Lcl-036	nsr- nis-	Lactococcus	lactis	cremoris	61	LA	1.98	0.82	8.209	15.971	7.76	4.69433333333333	11.2886666666667	6.9	1.09727377392506			0	0	0	0	0	0	0	0	0	4.35	5.62	A	17.8883333333333	4.36360290485535	13.4996666666667	4.43569758486141	0.0072268365528248
Lcl-046	nsr- nis-	Lactococcus	lactis	cremoris	5	LA	1.91	0.36	7.608	16.324	8.72	4.04416666666667	10.3888333333333	5.8005	1.14214287211845			0	0	0	0	0	0	0	0	0	4.45	6.07	A	0.188333333333333	6.41524511659097	-4.4	6.37816889410758	0.988575878263407
Lcl-046	nsr- nis-	Lactococcus	lactis	cremoris	5	LA	1.91	0.36	7.608	16.324	8.72	4.04416666666667	10.3888333333333	5.8005	1.14214287211845			0	0	0	0	0	0	0	0	0	4.45	6.07	A	0.188333333333333	6.35281246508233	-4.4	6.39382609077503	0.996769220445164
Lcl-046	nsr- nis-	Lactococcus	lactis	cremoris	5	LA	1.91	0.36	7.608	16.324	8.72	4.04416666666667	10.3888333333333	5.8005	1.14214287211845			0	0	0	0	0	0	0	0	0	4.45	6.07	A	0.288333333333333	6.42090548407784	-4.3	6.38382926159445	0.991537923684399
Lcl-046	nsr- nis-	Lactococcus	lactis	cremoris	5	LA	1.91	0.36	7.608	16.324	8.72	4.04416666666667	10.3888333333333	5.8005	1.14214287211845			0	0	0	0	0	0	0	0	0	4.45	6.07	A	0.288333333333333	6.35066271770046	-4.3	6.39167634339316	0.995644267091245
Lcl-046	nsr- nis-	Lactococcus	lactis	cremoris	5	LA	1.91	0.36	7.608	16.324	8.72	4.04416666666667	10.3888333333333	5.8005	1.14214287211845			0	0	0	0	0	0	0	0	0	4.45	6.07	A	0.388333333333333	6.4262952305219	-4.2	6.38921900803851	0.994358354303432
Lcl-046	nsr- nis-	Lactococcus	lactis	cremoris	5	LA	1.91	0.36	7.608	16.324	8.72	4.04416666666667	10.3888333333333	5.8005	1.14214287211845			0	0	0	0	0	0	0	0	0	4.45	6.07	A	0.388333333333333	6.35066271770046	-4.2	6.39167634339316	0.995644267091245
Lcl-046	nsr- nis-	Lactococcus	lactis	cremoris	5	LA	1.91	0.36	7.608	16.324	8.72	4.04416666666667	10.3888333333333	5.8005	1.14214287211845			0	0	0	0	0	0	0	0	0	4.45	6.07	A	0.488833333333333	6.43384167986295	-4.0995	6.39676545737956	0.998307378066866
Lcl-046	nsr- nis-	Lactococcus	lactis	cremoris	5	LA	1.91	0.36	7.608	16.324	8.72	4.04416666666667	10.3888333333333	5.8005	1.14214287211845			0	0	0	0	0	0	0	0	0	4.45	6.07	A	0.488833333333333	6.35281246508233	-4.0995	6.39382609077503	0.996769220445164
Lcl-046	nsr- nis-	Lactococcus	lactis	cremoris	5	LA	1.91	0.36	7.608	16.324	8.72	4.04416666666667	10.3888333333333	5.8005	1.14214287211845			0	0	0	0	0	0	0	0	0	4.45	6.07	A	0.588833333333333	6.43384167986295	-3.9995	6.39676545737956	0.998307378066866
Lcl-046	nsr- nis-	Lactococcus	lactis	cremoris	5	LA	1.91	0.36	7.608	16.324	8.72	4.04416666666667	10.3888333333333	5.8005	1.14214287211845			0	0	0	0	0	0	0	0	0	4.45	6.07	A	0.588833333333333	6.34424469210398	-3.9995	6.38525831779669	0.992285742512416
Lcl-046	nsr- nis-	Lactococcus	lactis	cremoris	5	LA	1.91	0.36	7.608	16.324	8.72	4.04416666666667	10.3888333333333	5.8005	1.14214287211845			0	0	0	0	0	0	0	0	0	4.45	6.07	A	0.688666666666667	6.43707622248339	-3.89966666666667	6.4	1
Lcl-046	nsr- nis-	Lactococcus	lactis	cremoris	5	LA	1.91	0.36	7.608	16.324	8.72	4.04416666666667	10.3888333333333	5.8005	1.14214287211845			0	0	0	0	0	0	0	0	0	4.45	6.07	A	0.688666666666667	6.34424469210398	-3.89966666666667	6.38525831779669	0.992285742512416
Lcl-046	nsr- nis-	Lactococcus	lactis	cremoris	5	LA	1.91	0.36	7.608	16.324	8.72	4.04416666666667	10.3888333333333	5.8005	1.14214287211845			0	0	0	0	0	0	0	0	0	4.45	6.07	A	0.788333333333333	6.4349195195864	-3.8	6.39784329710301	0.998871406855599
Lcl-046	nsr- nis-	Lactococcus	lactis	cremoris	5	LA	1.91	0.36	7.608	16.324	8.72	4.04416666666667	10.3888333333333	5.8005	1.14214287211845			0	0	0	0	0	0	0	0	0	4.45	6.07	A	0.788333333333333	6.34424469210398	-3.8	6.38525831779669	0.992285742512416
Lcl-046	nsr- nis-	Lactococcus	lactis	cremoris	5	LA	1.91	0.36	7.608	16.324	8.72	4.04416666666667	10.3888333333333	5.8005	1.14214287211845			0	0	0	0	0	0	0	0	0	4.45	6.07	A	0.888333333333333	6.42737307024535	-3.7	6.39029684776196	0.994922383092165
Lcl-046	nsr- nis-	Lactococcus	lactis	cremoris	5	LA	1.91	0.36	7.608	16.324	8.72	4.04416666666667	10.3888333333333	5.8005	1.14214287211845			0	0	0	0	0	0	0	0	0	4.45	6.07	A	0.888333333333333	6.35067595546732	-3.7	6.39168958116002	0.995651194356446
Lcl-046	nsr- nis-	Lactococcus	lactis	cremoris	5	LA	1.91	0.36	7.608	16.324	8.72	4.04416666666667	10.3888333333333	5.8005	1.14214287211845			0	0	0	0	0	0	0	0	0	4.45	6.07	A	0.988333333333333	6.41982662090429	-3.6	6.3827503984209	0.99097335932873
Lcl-046	nsr- nis-	Lactococcus	lactis	cremoris	5	LA	1.91	0.36	7.608	16.324	8.72	4.04416666666667	10.3888333333333	5.8005	1.14214287211845			0	0	0	0	0	0	0	0	0	4.45	6.07	A	0.988333333333333	6.34852620808545	-3.6	6.38953983377815	0.994526241002527
Lcl-046	nsr- nis-	Lactococcus	lactis	cremoris	5	LA	1.91	0.36	7.608	16.324	8.72	4.04416666666667	10.3888333333333	5.8005	1.14214287211845			0	0	0	0	0	0	0	0	0	4.45	6.07	A	1.08833333333333	6.4176699180073	-3.5	6.38059369552391	0.989844766184329
Lcl-046	nsr- nis-	Lactococcus	lactis	cremoris	5	LA	1.91	0.36	7.608	16.324	8.72	4.04416666666667	10.3888333333333	5.8005	1.14214287211845			0	0	0	0	0	0	0	0	0	4.45	6.07	A	1.08833333333333	6.35709398106379	-3.5	6.3981076067565	0.999009718935274
Lcl-046	nsr- nis-	Lactococcus	lactis	cremoris	5	LA	1.91	0.36	7.608	16.324	8.72	4.04416666666667	10.3888333333333	5.8005	1.14214287211845			0	0	0	0	0	0	0	0	0	4.45	6.07	A	1.18866666666667	6.41227867248987	-3.39966666666667	6.37520245000648	0.987023551106793
Lcl-046	nsr- nis-	Lactococcus	lactis	cremoris	5	LA	1.91	0.36	7.608	16.324	8.72	4.04416666666667	10.3888333333333	5.8005	1.14214287211845			0	0	0	0	0	0	0	0	0	4.45	6.07	A	1.18866666666667	6.35494696874834	-3.39966666666667	6.39596059444104	0.997886196829587
Lcl-046	nsr- nis-	Lactococcus	lactis	cremoris	5	LA	1.91	0.36	7.608	16.324	8.72	4.04416666666667	10.3888333333333	5.8005	1.14214287211845			0	0	0	0	0	0	0	0	0	4.45	6.07	A	1.28833333333333	6.41982512183093	-3.3	6.38274889934754	0.990972574870227
Lcl-046	nsr- nis-	Lactococcus	lactis	cremoris	5	LA	1.91	0.36	7.608	16.324	8.72	4.04416666666667	10.3888333333333	5.8005	1.14214287211845			0	0	0	0	0	0	0	0	0	4.45	6.07	A	1.28833333333333	6.35494696874834	-3.3	6.39596059444104	0.997886196829587
Lcl-046	nsr- nis-	Lactococcus	lactis	cremoris	5	LA	1.91	0.36	7.608	16.324	8.72	4.04416666666667	10.3888333333333	5.8005	1.14214287211845			0	0	0	0	0	0	0	0	0	4.45	6.07	A	1.38833333333333	6.41982512183093	-3.2	6.38274889934754	0.990972574870227
Lcl-046	nsr- nis-	Lactococcus	lactis	cremoris	5	LA	1.91	0.36	7.608	16.324	8.72	4.04416666666667	10.3888333333333	5.8005	1.14214287211845			0	0	0	0	0	0	0	0	0	4.45	6.07	A	1.38833333333333	6.35279995643288	-3.2	6.39381358212559	0.9967626747239
Lcl-046	nsr- nis-	Lactococcus	lactis	cremoris	5	LA	1.91	0.36	7.608	16.324	8.72	4.04416666666667	10.3888333333333	5.8005	1.14214287211845			0	0	0	0	0	0	0	0	0	4.45	6.07	A	1.48833333333333	6.41982512183093	-3.1	6.38274889934754	0.990972574870227
Lcl-046	nsr- nis-	Lactococcus	lactis	cremoris	5	LA	1.91	0.36	7.608	16.324	8.72	4.04416666666667	10.3888333333333	5.8005	1.14214287211845			0	0	0	0	0	0	0	0	0	4.45	6.07	A	1.48833333333333	6.35065294411743	-3.1	6.39166656981013	0.995639152618213
Lcl-046	nsr- nis-	Lactococcus	lactis	cremoris	5	LA	1.91	0.36	7.608	16.324	8.72	4.04416666666667	10.3888333333333	5.8005	1.14214287211845			0	0	0	0	0	0	0	0	0	4.45	6.07	A	1.58866666666667	6.41982512183093	-2.99966666666667	6.38274889934754	0.990972574870227
Lcl-046	nsr- nis-	Lactococcus	lactis	cremoris	5	LA	1.91	0.36	7.608	16.324	8.72	4.04416666666667	10.3888333333333	5.8005	1.14214287211845			0	0	0	0	0	0	0	0	0	4.45	6.07	A	1.58866666666667	6.35065294411743	-2.99966666666667	6.39166656981013	0.995639152618213
Lcl-046	nsr- nis-	Lactococcus	lactis	cremoris	5	LA	1.91	0.36	7.608	16.324	8.72	4.04416666666667	10.3888333333333	5.8005	1.14214287211845			0	0	0	0	0	0	0	0	0	4.45	6.07	A	1.68883333333333	6.41766877051845	-2.8995	6.38059254803506	0.989844165708458
Lcl-046	nsr- nis-	Lactococcus	lactis	cremoris	5	LA	1.91	0.36	7.608	16.324	8.72	4.04416666666667	10.3888333333333	5.8005	1.14214287211845			0	0	0	0	0	0	0	0	0	4.45	6.07	A	1.68883333333333	6.35279995643288	-2.8995	6.39381358212559	0.9967626747239
Lcl-046	nsr- nis-	Lactococcus	lactis	cremoris	5	LA	1.91	0.36	7.608	16.324	8.72	4.04416666666667	10.3888333333333	5.8005	1.14214287211845			0	0	0	0	0	0	0	0	0	4.45	6.07	A	1.78833333333333	6.40796596986493	-2.8	6.37088974738154	0.984766732783255
Lcl-046	nsr- nis-	Lactococcus	lactis	cremoris	5	LA	1.91	0.36	7.608	16.324	8.72	4.04416666666667	10.3888333333333	5.8005	1.14214287211845			0	0	0	0	0	0	0	0	0	4.45	6.07	A	1.78833333333333	6.3589863743073	-2.8	6.4	1
Lcl-046	nsr- nis-	Lactococcus	lactis	cremoris	5	LA	1.91	0.36	7.608	16.324	8.72	4.04416666666667	10.3888333333333	5.8005	1.14214287211845			0	0	0	0	0	0	0	0	0	4.45	6.07	A	1.88866666666667	6.41335721538236	-2.69966666666667	6.37628099289897	0.987587947860791
Lcl-046	nsr- nis-	Lactococcus	lactis	cremoris	5	LA	1.91	0.36	7.608	16.324	8.72	4.04416666666667	10.3888333333333	5.8005	1.14214287211845			0	0	0	0	0	0	0	0	0	4.45	6.07	A	1.88866666666667	6.35470212325942	-2.69966666666667	6.39571574895212	0.997758070261657
Lcl-046	nsr- nis-	Lactococcus	lactis	cremoris	5	LA	1.91	0.36	7.608	16.324	8.72	4.04416666666667	10.3888333333333	5.8005	1.14214287211845			0	0	0	0	0	0	0	0	0	4.45	6.07	A	1.98833333333333	6.42090366472341	-2.6	6.38382744224002	0.991536971624225
Lcl-046	nsr- nis-	Lactococcus	lactis	cremoris	5	LA	1.91	0.36	7.608	16.324	8.72	4.04416666666667	10.3888333333333	5.8005	1.14214287211845			0	0	0	0	0	0	0	0	0	4.45	6.07	A	1.98833333333333	6.35041787221154	-2.6	6.39143149790424	0.995516140523315
Lcl-046	nsr- nis-	Lactococcus	lactis	cremoris	5	LA	1.91	0.36	7.608	16.324	8.72	4.04416666666667	10.3888333333333	5.8005	1.14214287211845			0	0	0	0	0	0	0	0	0	4.45	6.07	A	2.08866666666667	6.42629491024084	-2.49966666666667	6.38921868775745	0.994358186701761
Lcl-046	nsr- nis-	Lactococcus	lactis	cremoris	5	LA	1.91	0.36	7.608	16.324	8.72	4.04416666666667	10.3888333333333	5.8005	1.14214287211845			0	0	0	0	0	0	0	0	0	4.45	6.07	A	2.08866666666667	6.3439866088482	-2.49966666666667	6.3850002345409	0.992150688679286
Lcl-046	nsr- nis-	Lactococcus	lactis	cremoris	5	LA	1.91	0.36	7.608	16.324	8.72	4.04416666666667	10.3888333333333	5.8005	1.14214287211845			0	0	0	0	0	0	0	0	0	4.45	6.07	A	2.18833333333333	6.43384250707074	-2.4	6.39676628458735	0.998307810941066
Lcl-046	nsr- nis-	Lactococcus	lactis	cremoris	5	LA	1.91	0.36	7.608	16.324	8.72	4.04416666666667	10.3888333333333	5.8005	1.14214287211845			0	0	0	0	0	0	0	0	0	4.45	6.07	A	2.18833333333333	6.33541883586985	-2.4	6.37643246156256	0.987667210746539
Lcl-046	nsr- nis-	Lactococcus	lactis	cremoris	5	LA	1.91	0.36	7.608	16.324	8.72	4.04416666666667	10.3888333333333	5.8005	1.14214287211845			0	0	0	0	0	0	0	0	0	4.45	6.07	A	2.28833333333333	6.43626843772743	-2.3	6.39919221524404	0.999577289788502
Lcl-046	nsr- nis-	Lactococcus	lactis	cremoris	5	LA	1.91	0.36	7.608	16.324	8.72	4.04416666666667	10.3888333333333	5.8005	1.14214287211845			0	0	0	0	0	0	0	0	0	4.45	6.07	A	2.28833333333333	6.32066464501709	-2.3	6.36167827070979	0.979946407537691
Lcl-046	nsr- nis-	Lactococcus	lactis	cremoris	5	LA	1.91	0.36	7.608	16.324	8.72	4.04416666666667	10.3888333333333	5.8005	1.14214287211845			0	0	0	0	0	0	0	0	0	4.45	6.07	A	2.38866666666667	6.43626843772743	-2.19966666666667	6.39919221524404	0.999577289788502
Lcl-046	nsr- nis-	Lactococcus	lactis	cremoris	5	LA	1.91	0.36	7.608	16.324	8.72	4.04416666666667	10.3888333333333	5.8005	1.14214287211845			0	0	0	0	0	0	0	0	0	4.45	6.07	A	2.38866666666667	6.31852813540208	-2.19966666666667	6.35954176109478	0.978828381448974
Lcl-046	nsr- nis-	Lactococcus	lactis	cremoris	5	LA	1.91	0.36	7.608	16.324	8.72	4.04416666666667	10.3888333333333	5.8005	1.14214287211845			0	0	0	0	0	0	0	0	0	4.45	6.07	A	2.48833333333333	6.43411323390381	-2.1	6.39703701142042	0.998449481102604
Lcl-046	nsr- nis-	Lactococcus	lactis	cremoris	5	LA	1.91	0.36	7.608	16.324	8.72	4.04416666666667	10.3888333333333	5.8005	1.14214287211845			0	0	0	0	0	0	0	0	0	4.45	6.07	A	2.48833333333333	6.31639162578707	-2.1	6.35740525147977	0.977710355360257
Lcl-046	nsr- nis-	Lactococcus	lactis	cremoris	5	LA	1.91	0.36	7.608	16.324	8.72	4.04416666666667	10.3888333333333	5.8005	1.14214287211845			0	0	0	0	0	0	0	0	0	4.45	6.07	A	2.58866666666667	6.43411323390381	-1.99966666666667	6.39703701142042	0.998449481102604
Lcl-046	nsr- nis-	Lactococcus	lactis	cremoris	5	LA	1.91	0.36	7.608	16.324	8.72	4.04416666666667	10.3888333333333	5.8005	1.14214287211845			0	0	0	0	0	0	0	0	0	4.45	6.07	A	2.58866666666667	6.31639162578707	-1.99966666666667	6.35740525147977	0.977710355360257
Lcl-046	nsr- nis-	Lactococcus	lactis	cremoris	5	LA	1.91	0.36	7.608	16.324	8.72	4.04416666666667	10.3888333333333	5.8005	1.14214287211845			0	0	0	0	0	0	0	0	0	4.45	6.07	A	2.68833333333333	6.4289915677306	-1.9	6.39191534524721	0.995769335710735
Lcl-046	nsr- nis-	Lactococcus	lactis	cremoris	5	LA	1.91	0.36	7.608	16.324	8.72	4.04416666666667	10.3888333333333	5.8005	1.14214287211845			0	0	0	0	0	0	0	0	0	4.45	6.07	A	2.68833333333333	6.31000847265668	-1.9	6.35102209834938	0.974370079389616
Lcl-046	nsr- nis-	Lactococcus	lactis	cremoris	5	LA	1.91	0.36	7.608	16.324	8.72	4.04416666666667	10.3888333333333	5.8005	1.14214287211845			0	0	0	0	0	0	0	0	0	4.45	6.07	A	2.78833333333333	6.4289915677306	-1.8	6.39191534524721	0.995769335710735
Lcl-046	nsr- nis-	Lactococcus	lactis	cremoris	5	LA	1.91	0.36	7.608	16.324	8.72	4.04416666666667	10.3888333333333	5.8005	1.14214287211845			0	0	0	0	0	0	0	0	0	4.45	6.07	A	2.78833333333333	6.30362531952628	-1.8	6.34463894521898	0.971029803418977
Lcl-046	nsr- nis-	Lactococcus	lactis	cremoris	5	LA	1.91	0.36	7.608	16.324	8.72	4.04416666666667	10.3888333333333	5.8005	1.14214287211845			0	0	0	0	0	0	0	0	0	4.45	6.07	A	2.88833333333333	6.42386990155738	-1.7	6.386793679074	0.993089190318866
Lcl-046	nsr- nis-	Lactococcus	lactis	cremoris	5	LA	1.91	0.36	7.608	16.324	8.72	4.04416666666667	10.3888333333333	5.8005	1.14214287211845			0	0	0	0	0	0	0	0	0	4.45	6.07	A	2.88833333333333	6.29936518968425	-1.7	6.34037881537695	0.968800496201611
Lcl-046	nsr- nis-	Lactococcus	lactis	cremoris	5	LA	1.91	0.36	7.608	16.324	8.72	4.04416666666667	10.3888333333333	5.8005	1.14214287211845			0	0	0	0	0	0	0	0	0	4.45	6.07	A	2.98866666666667	6.42386990155738	-1.59966666666667	6.386793679074	0.993089190318866
Lcl-046	nsr- nis-	Lactococcus	lactis	cremoris	5	LA	1.91	0.36	7.608	16.324	8.72	4.04416666666667	10.3888333333333	5.8005	1.14214287211845			0	0	0	0	0	0	0	0	0	4.45	6.07	A	2.98866666666667	6.29936518968425	-1.59966666666667	6.34037881537695	0.968800496201611
Lcl-046	nsr- nis-	Lactococcus	lactis	cremoris	5	LA	1.91	0.36	7.608	16.324	8.72	4.04416666666667	10.3888333333333	5.8005	1.14214287211845			0	0	0	0	0	0	0	0	0	4.45	6.07	A	3.08866666666667	6.41874823538417	-1.49966666666667	6.38167201290078	0.990409044926997
Lcl-046	nsr- nis-	Lactococcus	lactis	cremoris	5	LA	1.91	0.36	7.608	16.324	8.72	4.04416666666667	10.3888333333333	5.8005	1.14214287211845			0	0	0	0	0	0	0	0	0	4.45	6.07	A	3.08866666666667	6.29084552693885	-1.49966666666667	6.33185915263155	0.964342194142254
Lcl-046	nsr- nis-	Lactococcus	lactis	cremoris	5	LA	1.91	0.36	7.608	16.324	8.72	4.04416666666667	10.3888333333333	5.8005	1.14214287211845			0	0	0	0	0	0	0	0	0	4.45	6.07	A	3.18833333333333	6.42629440503986	-1.4	6.38921818255647	0.994357922332312
Lcl-046	nsr- nis-	Lactococcus	lactis	cremoris	5	LA	1.91	0.36	7.608	16.324	8.72	4.04416666666667	10.3888333333333	5.8005	1.14214287211845			0	0	0	0	0	0	0	0	0	4.45	6.07	A	3.18833333333333	6.28240631423048	-1.4	6.32341993992319	0.959925991233596
Lcl-046	nsr- nis-	Lactococcus	lactis	cremoris	5	LA	1.91	0.36	7.608	16.324	8.72	4.04416666666667	10.3888333333333	5.8005	1.14214287211845			0	0	0	0	0	0	0	0	0	4.45	6.07	A	3.28833333333333	6.42629440503986	-1.3	6.38921818255647	0.994357922332312
Lcl-046	nsr- nis-	Lactococcus	lactis	cremoris	5	LA	1.91	0.36	7.608	16.324	8.72	4.04416666666667	10.3888333333333	5.8005	1.14214287211845			0	0	0	0	0	0	0	0	0	4.45	6.07	A	3.28833333333333	6.28240631423048	-1.3	6.32341993992319	0.959925991233596
Lcl-046	nsr- nis-	Lactococcus	lactis	cremoris	5	LA	1.91	0.36	7.608	16.324	8.72	4.04416666666667	10.3888333333333	5.8005	1.14214287211845			0	0	0	0	0	0	0	0	0	4.45	6.07	A	3.38833333333333	6.42629440503986	-1.2	6.38921818255647	0.994357922332312
Lcl-046	nsr- nis-	Lactococcus	lactis	cremoris	5	LA	1.91	0.36	7.608	16.324	8.72	4.04416666666667	10.3888333333333	5.8005	1.14214287211845			0	0	0	0	0	0	0	0	0	4.45	6.07	A	3.38833333333333	6.27184407823376	-1.2	6.31285770392646	0.954398819571663
Lcl-046	nsr- nis-	Lactococcus	lactis	cremoris	5	LA	1.91	0.36	7.608	16.324	8.72	4.04416666666667	10.3888333333333	5.8005	1.14214287211845			0	0	0	0	0	0	0	0	0	4.45	6.07	A	3.48833333333333	6.41901631523603	-1.1	6.38194009275264	0.990549329934903
Lcl-046	nsr- nis-	Lactococcus	lactis	cremoris	5	LA	1.91	0.36	7.608	16.324	8.72	4.04416666666667	10.3888333333333	5.8005	1.14214287211845			0	0	0	0	0	0	0	0	0	4.45	6.07	A	3.48833333333333	6.26758394839173	-1.1	6.30859757408443	0.952169512354298
Lcl-046	nsr- nis-	Lactococcus	lactis	cremoris	5	LA	1.91	0.36	7.608	16.324	8.72	4.04416666666667	10.3888333333333	5.8005	1.14214287211845			0	0	0	0	0	0	0	0	0	4.45	6.07	A	3.58833333333333	6.4168598916054	-1	6.37978366912201	0.989420882929364
Lcl-046	nsr- nis-	Lactococcus	lactis	cremoris	5	LA	1.91	0.36	7.608	16.324	8.72	4.04416666666667	10.3888333333333	5.8005	1.14214287211845			0	0	0	0	0	0	0	0	0	4.45	6.07	A	3.58833333333333	6.26098316886877	-1	6.30199679456147	0.948715353449188
Lcl-046	nsr- nis-	Lactococcus	lactis	cremoris	5	LA	1.91	0.36	7.608	16.324	8.72	4.04416666666667	10.3888333333333	5.8005	1.14214287211845			0	0	0	0	0	0	0	0	0	4.45	6.07	A	3.68833333333333	6.4168598916054	-0.9	6.37978366912201	0.989420882929364
Lcl-046	nsr- nis-	Lactococcus	lactis	cremoris	5	LA	1.91	0.36	7.608	16.324	8.72	4.04416666666667	10.3888333333333	5.8005	1.14214287211845			0	0	0	0	0	0	0	0	0	4.45	6.07	A	3.68833333333333	6.26942238157713	-0.9	6.31043600726983	0.953131556357846
Lcl-046	nsr- nis-	Lactococcus	lactis	cremoris	5	LA	1.91	0.36	7.608	16.324	8.72	4.04416666666667	10.3888333333333	5.8005	1.14214287211845			0	0	0	0	0	0	0	0	0	4.45	6.07	A	3.78833333333333	6.4168598916054	-0.8	6.37978366912201	0.989420882929364
Lcl-046	nsr- nis-	Lactococcus	lactis	cremoris	5	LA	1.91	0.36	7.608	16.324	8.72	4.04416666666667	10.3888333333333	5.8005	1.14214287211845			0	0	0	0	0	0	0	0	0	4.45	6.07	A	3.78833333333333	6.26282160205417	-0.8	6.30383522774688	0.949677397452737
Lcl-046	nsr- nis-	Lactococcus	lactis	cremoris	5	LA	1.91	0.36	7.608	16.324	8.72	4.04416666666667	10.3888333333333	5.8005	1.14214287211845			0	0	0	0	0	0	0	0	0	4.45	6.07	A	3.88833333333333	6.42225102593468	-0.7	6.38517480345129	0.992242039822626
Lcl-046	nsr- nis-	Lactococcus	lactis	cremoris	5	LA	1.91	0.36	7.608	16.324	8.72	4.04416666666667	10.3888333333333	5.8005	1.14214287211845			0	0	0	0	0	0	0	0	0	4.45	6.07	A	3.88833333333333	6.25629332740739	-0.7	6.2973069531001	0.946261180030576
Lcl-046	nsr- nis-	Lactococcus	lactis	cremoris	5	LA	1.91	0.36	7.608	16.324	8.72	4.04416666666667	10.3888333333333	5.8005	1.14214287211845			0	0	0	0	0	0	0	0	0	4.45	6.07	A	3.98833333333333	6.42036479408117	-0.6	6.38328857159778	0.991254982986199
Lcl-046	nsr- nis-	Lactococcus	lactis	cremoris	5	LA	1.91	0.36	7.608	16.324	8.72	4.04416666666667	10.3888333333333	5.8005	1.14214287211845			0	0	0	0	0	0	0	0	0	4.45	6.07	A	3.98833333333333	6.24756952459607	-0.6	6.28858315028877	0.941696052372192
Lcl-046	nsr- nis-	Lactococcus	lactis	cremoris	5	LA	1.91	0.36	7.608	16.324	8.72	4.04416666666667	10.3888333333333	5.8005	1.14214287211845			0	0	0	0	0	0	0	0	0	4.45	6.07	A	4.08833333333333	6.42791235204107	-0.5	6.39083612955768	0.995204586885001
Lcl-046	nsr- nis-	Lactococcus	lactis	cremoris	5	LA	1.91	0.36	7.608	16.324	8.72	4.04416666666667	10.3888333333333	5.8005	1.14214287211845			0	0	0	0	0	0	0	0	0	4.45	6.07	A	4.08833333333333	6.23247863767556	-0.5	6.27349226336826	0.933799057591322
Lcl-046	nsr- nis-	Lactococcus	lactis	cremoris	5	LA	1.91	0.36	7.608	16.324	8.72	4.04416666666667	10.3888333333333	5.8005	1.14214287211845			0	0	0	0	0	0	0	0	0	4.45	6.07	A	4.18866666666667	6.42036618238538	-0.399666666666668	6.38328995990199	0.991255709479686
Lcl-046	nsr- nis-	Lactococcus	lactis	cremoris	5	LA	1.91	0.36	7.608	16.324	8.72	4.04416666666667	10.3888333333333	5.8005	1.14214287211845			0	0	0	0	0	0	0	0	0	4.45	6.07	A	4.18866666666667	6.21751115032042	-0.399666666666668	6.25852477601312	0.925966637260503
Lcl-046	nsr- nis-	Lactococcus	lactis	cremoris	5	LA	1.91	0.36	7.608	16.324	8.72	4.04416666666667	10.3888333333333	5.8005	1.14214287211845			0	0	0	0	0	0	0	0	0	4.45	6.07	A	4.28866666666667	6.42791235204107	-0.299666666666667	6.39083612955768	0.995204586885001
Lcl-046	nsr- nis-	Lactococcus	lactis	cremoris	5	LA	1.91	0.36	7.608	16.324	8.72	4.04416666666667	10.3888333333333	5.8005	1.14214287211845			0	0	0	0	0	0	0	0	0	4.45	6.07	A	4.28866666666667	6.21070574049794	-0.299666666666667	6.25171936619064	0.922405396219277
Lcl-046	nsr- nis-	Lactococcus	lactis	cremoris	5	LA	1.91	0.36	7.608	16.324	8.72	4.04416666666667	10.3888333333333	5.8005	1.14214287211845			0	0	0	0	0	0	0	0	0	4.45	6.07	A	4.38866666666667	6.42036479408117	-0.199666666666667	6.38328857159778	0.991254982986199
Lcl-046	nsr- nis-	Lactococcus	lactis	cremoris	5	LA	1.91	0.36	7.608	16.324	8.72	4.04416666666667	10.3888333333333	5.8005	1.14214287211845			0	0	0	0	0	0	0	0	0	4.45	6.07	A	4.38866666666667	6.20552724630909	-0.199666666666667	6.24654087200179	0.919695512976659
Lcl-046	nsr- nis-	Lactococcus	lactis	cremoris	5	LA	1.91	0.36	7.608	16.324	8.72	4.04416666666667	10.3888333333333	5.8005	1.14214287211845			0	0	0	0	0	0	0	0	0	4.45	6.07	A	4.48833333333333	6.42225102593468	-0.100000000000001	6.38517480345129	0.992242039822626
Lcl-046	nsr- nis-	Lactococcus	lactis	cremoris	5	LA	1.91	0.36	7.608	16.324	8.72	4.04416666666667	10.3888333333333	5.8005	1.14214287211845			0	0	0	0	0	0	0	0	0	4.45	6.07	A	4.48833333333333	6.1835261394989	-0.100000000000001	6.2245397651916	0.908182430507179
Lcl-046	nsr- nis-	Lactococcus	lactis	cremoris	5	LA	1.91	0.36	7.608	16.324	8.72	4.04416666666667	10.3888333333333	5.8005	1.14214287211845			0	0	0	0	0	0	0	0	0	4.45	6.07	A	4.58833333333333	6.4168598916054	0	6.37978366912201	0.989420882929364
Lcl-046	nsr- nis-	Lactococcus	lactis	cremoris	5	LA	1.91	0.36	7.608	16.324	8.72	4.04416666666667	10.3888333333333	5.8005	1.14214287211845			0	0	0	0	0	0	0	0	0	4.45	6.07	A	4.58833333333333	6.17661591960922	0	6.21762954530192	0.904566342818569
Lcl-046	nsr- nis-	Lactococcus	lactis	cremoris	5	LA	1.91	0.36	7.608	16.324	8.72	4.04416666666667	10.3888333333333	5.8005	1.14214287211845			0	0	0	0	0	0	0	0	0	4.45	6.07	A	4.68866666666667	6.42225102593468	0.100333333333332	6.38517480345129	0.992242039822626
Lcl-046	nsr- nis-	Lactococcus	lactis	cremoris	5	LA	1.91	0.36	7.608	16.324	8.72	4.04416666666667	10.3888333333333	5.8005	1.14214287211845			0	0	0	0	0	0	0	0	0	4.45	6.07	A	4.68866666666667	6.17143742542037	0.100333333333332	6.21245105111307	0.901856459575952
Lcl-046	nsr- nis-	Lactococcus	lactis	cremoris	5	LA	1.91	0.36	7.608	16.324	8.72	4.04416666666667	10.3888333333333	5.8005	1.14214287211845			0	0	0	0	0	0	0	0	0	4.45	6.07	A	4.7883333333333304	6.41254843264836	0.199999999999999	6.37547221016497	0.987164715411773
Lcl-046	nsr- nis-	Lactococcus	lactis	cremoris	5	LA	1.91	0.36	7.608	16.324	8.72	4.04416666666667	10.3888333333333	5.8005	1.14214287211845			0	0	0	0	0	0	0	0	0	4.45	6.07	A	4.7883333333333304	6.15624172843266	0.199999999999999	6.19725535412536	0.893904618147698
Lcl-046	nsr- nis-	Lactococcus	lactis	cremoris	5	LA	1.91	0.36	7.608	16.324	8.72	4.04416666666667	10.3888333333333	5.8005	1.14214287211845			0	0	0	0	0	0	0	0	0	4.45	6.07	A	4.88833333333333	6.42009599060826	0.3	6.38301976812487	0.991114319310574
Lcl-046	nsr- nis-	Lactococcus	lactis	cremoris	5	LA	1.91	0.36	7.608	16.324	8.72	4.04416666666667	10.3888333333333	5.8005	1.14214287211845			0	0	0	0	0	0	0	0	0	4.45	6.07	A	4.88833333333333	6.13994233748536	0.3	6.18095596317806	0.885375218522598
Lcl-046	nsr- nis-	Lactococcus	lactis	cremoris	5	LA	1.91	0.36	7.608	16.324	8.72	4.04416666666667	10.3888333333333	5.8005	1.14214287211845			0	0	0	0	0	0	0	0	0	4.45	6.07	A	4.98833333333333	6.42440912409179	0.399999999999999	6.3873329016084	0.993371363100518
Lcl-046	nsr- nis-	Lactococcus	lactis	cremoris	5	LA	1.91	0.36	7.608	16.324	8.72	4.04416666666667	10.3888333333333	5.8005	1.14214287211845			0	0	0	0	0	0	0	0	0	4.45	6.07	A	4.98833333333333	6.12633908850078	0.399999999999999	6.16735271419348	0.878256698133444
Lcl-046	nsr- nis-	Lactococcus	lactis	cremoris	5	LA	1.91	0.36	7.608	16.324	8.72	4.04416666666667	10.3888333333333	5.8005	1.14214287211845			0	0	0	0	0	0	0	0	0	4.45	6.07	A	5.08866666666667	6.42440912409179	0.500333333333333	6.3873329016084	0.993371363100518
Lcl-046	nsr- nis-	Lactococcus	lactis	cremoris	5	LA	1.91	0.36	7.608	16.324	8.72	4.04416666666667	10.3888333333333	5.8005	1.14214287211845			0	0	0	0	0	0	0	0	0	4.45	6.07	A	5.08866666666667	6.11273583951621	0.500333333333333	6.15374946520891	0.87113817774429
Lcl-046	nsr- nis-	Lactococcus	lactis	cremoris	5	LA	1.91	0.36	7.608	16.324	8.72	4.04416666666667	10.3888333333333	5.8005	1.14214287211845			0	0	0	0	0	0	0	0	0	4.45	6.07	A	5.18833333333333	6.41147507333138	0.6	6.37439885084799	0.986603031200046
Lcl-046	nsr- nis-	Lactococcus	lactis	cremoris	5	LA	1.91	0.36	7.608	16.324	8.72	4.04416666666667	10.3888333333333	5.8005	1.14214287211845			0	0	0	0	0	0	0	0	0	4.45	6.07	A	5.18833333333333	6.08298618749117	0.6	6.12399981318387	0.855570315629099
Lcl-046	nsr- nis-	Lactococcus	lactis	cremoris	5	LA	1.91	0.36	7.608	16.324	8.72	4.04416666666667	10.3888333333333	5.8005	1.14214287211845			0	0	0	0	0	0	0	0	0	4.45	6.07	A	5.2883333333333304	6.41902263129128	0.699999999999999	6.38194640880789	0.990552635098847
Lcl-046	nsr- nis-	Lactococcus	lactis	cremoris	5	LA	1.91	0.36	7.608	16.324	8.72	4.04416666666667	10.3888333333333	5.8005	1.14214287211845			0	0	0	0	0	0	0	0	0	4.45	6.07	A	5.2883333333333304	6.06243334554729	0.699999999999999	6.10344697123999	0.844815103797096
Lcl-046	nsr- nis-	Lactococcus	lactis	cremoris	5	LA	1.91	0.36	7.608	16.324	8.72	4.04416666666667	10.3888333333333	5.8005	1.14214287211845			0	0	0	0	0	0	0	0	0	4.45	6.07	A	5.38833333333333	6.413631496962	0.8	6.37655527447861	0.987731478205585
Lcl-046	nsr- nis-	Lactococcus	lactis	cremoris	5	LA	1.91	0.36	7.608	16.324	8.72	4.04416666666667	10.3888333333333	5.8005	1.14214287211845			0	0	0	0	0	0	0	0	0	4.45	6.07	A	5.38833333333333	6.04972398976156	0.8	6.09073761545426	0.838164353789041
Lcl-046	nsr- nis-	Lactococcus	lactis	cremoris	5	LA	1.91	0.36	7.608	16.324	8.72	4.04416666666667	10.3888333333333	5.8005	1.14214287211845			0	0	0	0	0	0	0	0	0	4.45	6.07	A	5.48916666666667	6.41686592143836	0.900833333333333	6.37978969895497	0.989424038314443
Lcl-046	nsr- nis-	Lactococcus	lactis	cremoris	5	LA	1.91	0.36	7.608	16.324	8.72	4.04416666666667	10.3888333333333	5.8005	1.14214287211845			0	0	0	0	0	0	0	0	0	4.45	6.07	A	5.48916666666667	6.02879421652645	0.900833333333333	6.06980784221915	0.827211895469457
Lcl-046	nsr- nis-	Lactococcus	lactis	cremoris	5	LA	1.91	0.36	7.608	16.324	8.72	4.04416666666667	10.3888333333333	5.8005	1.14214287211845			0	0	0	0	0	0	0	0	0	4.45	6.07	A	5.58833333333333	6.40932300500722	1	6.37224678252383	0.985476863307234
Lcl-046	nsr- nis-	Lactococcus	lactis	cremoris	5	LA	1.91	0.36	7.608	16.324	8.72	4.04416666666667	10.3888333333333	5.8005	1.14214287211845			0	0	0	0	0	0	0	0	0	4.45	6.07	A	5.58833333333333	6.00786444329134	1	6.04887806898404	0.816259437149873
Lcl-046	nsr- nis-	Lactococcus	lactis	cremoris	5	LA	1.91	0.36	7.608	16.324	8.72	4.04416666666667	10.3888333333333	5.8005	1.14214287211845			0	0	0	0	0	0	0	0	0	4.45	6.07	A	5.68833333333333	6.40717148050507	1.1	6.37009525802168	0.984350979994082
Lcl-046	nsr- nis-	Lactococcus	lactis	cremoris	5	LA	1.91	0.36	7.608	16.324	8.72	4.04416666666667	10.3888333333333	5.8005	1.14214287211845			0	0	0	0	0	0	0	0	0	4.45	6.07	A	5.68833333333333	5.9948690116504	1.1	6.0358826373431	0.80945898490447
Lcl-046	nsr- nis-	Lactococcus	lactis	cremoris	5	LA	1.91	0.36	7.608	16.324	8.72	4.04416666666667	10.3888333333333	5.8005	1.14214287211845			0	0	0	0	0	0	0	0	0	4.45	6.07	A	5.7883333333333304	6.4039370560287	1.2	6.36686083354532	0.982658419885225
Lcl-046	nsr- nis-	Lactococcus	lactis	cremoris	5	LA	1.91	0.36	7.608	16.324	8.72	4.04416666666667	10.3888333333333	5.8005	1.14214287211845			0	0	0	0	0	0	0	0	0	4.45	6.07	A	5.7883333333333304	5.9816204728089	1.2	6.0226340985016	0.802526082773763
Lcl-046	nsr- nis-	Lactococcus	lactis	cremoris	5	LA	1.91	0.36	7.608	16.324	8.72	4.04416666666667	10.3888333333333	5.8005	1.14214287211845			0	0	0	0	0	0	0	0	0	4.45	6.07	A	5.88833333333333	6.4039370560287	1.3	6.36686083354532	0.982658419885225
Lcl-046	nsr- nis-	Lactococcus	lactis	cremoris	5	LA	1.91	0.36	7.608	16.324	8.72	4.04416666666667	10.3888333333333	5.8005	1.14214287211845			0	0	0	0	0	0	0	0	0	4.45	6.07	A	5.88833333333333	5.95450223493484	1.3	5.99551586062754	0.788335228115195
Lcl-046	nsr- nis-	Lactococcus	lactis	cremoris	5	LA	1.91	0.36	7.608	16.324	8.72	4.04416666666667	10.3888333333333	5.8005	1.14214287211845			0	0	0	0	0	0	0	0	0	4.45	6.07	A	5.98866666666667	6.40070263155234	1.40033333333333	6.36362640906895	0.980965859776367
Lcl-046	nsr- nis-	Lactococcus	lactis	cremoris	5	LA	1.91	0.36	7.608	16.324	8.72	4.04416666666667	10.3888333333333	5.8005	1.14214287211845			0	0	0	0	0	0	0	0	0	4.45	6.07	A	5.98866666666667	5.9345421248520704	1.40033333333333	5.97555575054477	0.777890190260263
Lcl-046	nsr- nis-	Lactococcus	lactis	cremoris	5	LA	1.91	0.36	7.608	16.324	8.72	4.04416666666667	10.3888333333333	5.8005	1.14214287211845			0	0	0	0	0	0	0	0	0	4.45	6.07	A	6.08866666666667	6.40824554798348	1.50033333333333	6.37116932550009	0.984913034783576
Lcl-046	nsr- nis-	Lactococcus	lactis	cremoris	5	LA	1.91	0.36	7.608	16.324	8.72	4.04416666666667	10.3888333333333	5.8005	1.14214287211845			0	0	0	0	0	0	0	0	0	4.45	6.07	A	6.08866666666667	5.90796570551912	1.50033333333333	5.94897933121182	0.763982866862238
Lcl-046	nsr- nis-	Lactococcus	lactis	cremoris	5	LA	1.91	0.36	7.608	16.324	8.72	4.04416666666667	10.3888333333333	5.8005	1.14214287211845			0	0	0	0	0	0	0	0	0	4.45	6.07	A	6.18833333333333	6.41039707248564	1.6	6.37332085000225	0.986038918096727
Lcl-046	nsr- nis-	Lactococcus	lactis	cremoris	5	LA	1.91	0.36	7.608	16.324	8.72	4.04416666666667	10.3888333333333	5.8005	1.14214287211845			0	0	0	0	0	0	0	0	0	4.45	6.07	A	6.18833333333333	5.88114544284331	1.6	5.92215906853601	0.749947941314916
Lcl-046	nsr- nis-	Lactococcus	lactis	cremoris	5	LA	1.91	0.36	7.608	16.324	8.72	4.04416666666667	10.3888333333333	5.8005	1.14214287211845			0	0	0	0	0	0	0	0	0	4.45	6.07	A	6.2883333333333304	6.40069744620159	1.7	6.3636212237182	0.980963146305114
Lcl-046	nsr- nis-	Lactococcus	lactis	cremoris	5	LA	1.91	0.36	7.608	16.324	8.72	4.04416666666667	10.3888333333333	5.8005	1.14214287211845			0	0	0	0	0	0	0	0	0	4.45	6.07	A	6.2883333333333304	5.84740577599255	1.7	5.88841940168525	0.732292121982874
Lcl-046	nsr- nis-	Lactococcus	lactis	cremoris	5	LA	1.91	0.36	7.608	16.324	8.72	4.04416666666667	10.3888333333333	5.8005	1.14214287211845			0	0	0	0	0	0	0	0	0	4.45	6.07	A	6.38883333333333	6.39315452977045	1.8005	6.35607830728706	0.977015971297905
Lcl-046	nsr- nis-	Lactococcus	lactis	cremoris	5	LA	1.91	0.36	7.608	16.324	8.72	4.04416666666667	10.3888333333333	5.8005	1.14214287211845			0	0	0	0	0	0	0	0	0	4.45	6.07	A	6.38883333333333	5.81464379931379	1.8005	5.85565742500649	0.715147923619587
Lcl-046	nsr- nis-	Lactococcus	lactis	cremoris	5	LA	1.91	0.36	7.608	16.324	8.72	4.04416666666667	10.3888333333333	5.8005	1.14214287211845			0	0	0	0	0	0	0	0	0	4.45	6.07	A	6.48866666666667	6.39315452977045	1.90033333333333	6.35607830728706	0.977015971297905
Lcl-046	nsr- nis-	Lactococcus	lactis	cremoris	5	LA	1.91	0.36	7.608	16.324	8.72	4.04416666666667	10.3888333333333	5.8005	1.14214287211845			0	0	0	0	0	0	0	0	0	4.45	6.07	A	6.48866666666667	5.78870387511954	1.90033333333333	5.82971750081224	0.701573675329399
Lcl-046	nsr- nis-	Lactococcus	lactis	cremoris	5	LA	1.91	0.36	7.608	16.324	8.72	4.04416666666667	10.3888333333333	5.8005	1.14214287211845			0	0	0	0	0	0	0	0	0	4.45	6.07	A	6.58833333333333	6.38749584207429	2	6.3504196195909	0.974054804904005
Lcl-046	nsr- nis-	Lactococcus	lactis	cremoris	5	LA	1.91	0.36	7.608	16.324	8.72	4.04416666666667	10.3888333333333	5.8005	1.14214287211845			0	0	0	0	0	0	0	0	0	4.45	6.07	A	6.58833333333333	5.76181628607433	2	5.80282991176704	0.687503518188961
Lcl-046	nsr- nis-	Lactococcus	lactis	cremoris	5	LA	1.91	0.36	7.608	16.324	8.72	4.04416666666667	10.3888333333333	5.8005	1.14214287211845			0	0	0	0	0	0	0	0	0	4.45	6.07	A	6.68833333333333	6.38749584207429	2.1	6.3504196195909	0.974054804904005
Lcl-046	nsr- nis-	Lactococcus	lactis	cremoris	5	LA	1.91	0.36	7.608	16.324	8.72	4.04416666666667	10.3888333333333	5.8005	1.14214287211845			0	0	0	0	0	0	0	0	0	4.45	6.07	A	6.68833333333333	5.7295829558175	2.1	5.7705965815102	0.670635958174158
Lcl-046	nsr- nis-	Lactococcus	lactis	cremoris	5	LA	1.91	0.36	7.608	16.324	8.72	4.04416666666667	10.3888333333333	5.8005	1.14214287211845			0	0	0	0	0	0	0	0	0	4.45	6.07	A	6.7883333333333304	6.38938007080927	2.2	6.35230384832588	0.975040813517314
Lcl-046	nsr- nis-	Lactococcus	lactis	cremoris	5	LA	1.91	0.36	7.608	16.324	8.72	4.04416666666667	10.3888333333333	5.8005	1.14214287211845			0	0	0	0	0	0	0	0	0	4.45	6.07	A	6.7883333333333304	5.69636422278723	2.2	5.73737784847993	0.653252741220179
Lcl-046	nsr- nis-	Lactococcus	lactis	cremoris	5	LA	1.91	0.36	7.608	16.324	8.72	4.04416666666667	10.3888333333333	5.8005	1.14214287211845			0	0	0	0	0	0	0	0	0	4.45	6.07	A	6.88833333333333	6.38938007080927	2.3	6.35230384832588	0.975040813517314
Lcl-046	nsr- nis-	Lactococcus	lactis	cremoris	5	LA	1.91	0.36	7.608	16.324	8.72	4.04416666666667	10.3888333333333	5.8005	1.14214287211845			0	0	0	0	0	0	0	0	0	4.45	6.07	A	6.88833333333333	5.67094590589356	2.3	5.71195953158626	0.639951447737224
Lcl-046	nsr- nis-	Lactococcus	lactis	cremoris	5	LA	1.91	0.36	7.608	16.324	8.72	4.04416666666667	10.3888333333333	5.8005	1.14214287211845			0	0	0	0	0	0	0	0	0	4.45	6.07	A	6.98866666666667	6.37968044452522	2.40033333333333	6.34260422204183	0.969965041725701
Lcl-046	nsr- nis-	Lactococcus	lactis	cremoris	5	LA	1.91	0.36	7.608	16.324	8.72	4.04416666666667	10.3888333333333	5.8005	1.14214287211845			0	0	0	0	0	0	0	0	0	4.45	6.07	A	6.98866666666667	5.63763628777007	2.40033333333333	5.67864991346277	0.622520671013524
Lcl-046	nsr- nis-	Lactococcus	lactis	cremoris	5	LA	1.91	0.36	7.608	16.324	8.72	4.04416666666667	10.3888333333333	5.8005	1.14214287211845			0	0	0	0	0	0	0	0	0	4.45	6.07	A	7.08866666666667	6.37968044452522	2.50033333333333	6.34260422204183	0.969965041725701
Lcl-046	nsr- nis-	Lactococcus	lactis	cremoris	5	LA	1.91	0.36	7.608	16.324	8.72	4.04416666666667	10.3888333333333	5.8005	1.14214287211845			0	0	0	0	0	0	0	0	0	4.45	6.07	A	7.08866666666667	5.61189064374772	2.50033333333333	5.65290426944042	0.609048088683169
Lcl-046	nsr- nis-	Lactococcus	lactis	cremoris	5	LA	1.91	0.36	7.608	16.324	8.72	4.04416666666667	10.3888333333333	5.8005	1.14214287211845			0	0	0	0	0	0	0	0	0	4.45	6.07	A	7.18866666666667	6.3815646732602	2.60033333333333	6.34448845077681	0.970951050339011
Lcl-046	nsr- nis-	Lactococcus	lactis	cremoris	5	LA	1.91	0.36	7.608	16.324	8.72	4.04416666666667	10.3888333333333	5.8005	1.14214287211845			0	0	0	0	0	0	0	0	0	4.45	6.07	A	7.18866666666667	5.57882703729903	2.60033333333333	5.61984066299173	0.591746048787345
Lcl-046	nsr- nis-	Lactococcus	lactis	cremoris	5	LA	1.91	0.36	7.608	16.324	8.72	4.04416666666667	10.3888333333333	5.8005	1.14214287211845			0	0	0	0	0	0	0	0	0	4.45	6.07	A	7.2883333333333304	6.3815646732602	2.7	6.34448845077681	0.970951050339011
Lcl-046	nsr- nis-	Lactococcus	lactis	cremoris	5	LA	1.91	0.36	7.608	16.324	8.72	4.04416666666667	10.3888333333333	5.8005	1.14214287211845			0	0	0	0	0	0	0	0	0	4.45	6.07	A	7.2883333333333304	5.55318043970729	2.7	5.59419406539999	0.578325297018687
Lcl-046	nsr- nis-	Lactococcus	lactis	cremoris	5	LA	1.91	0.36	7.608	16.324	8.72	4.04416666666667	10.3888333333333	5.8005	1.14214287211845			0	0	0	0	0	0	0	0	0	4.45	6.07	A	7.38833333333333	6.38344890199518	2.8	6.34637267951179	0.97193705895232
Lcl-046	nsr- nis-	Lactococcus	lactis	cremoris	5	LA	1.91	0.36	7.608	16.324	8.72	4.04416666666667	10.3888333333333	5.8005	1.14214287211845			0	0	0	0	0	0	0	0	0	4.45	6.07	A	7.38833333333333	5.52409850750691	2.8	5.56511213319961	0.563106849752216
Lcl-046	nsr- nis-	Lactococcus	lactis	cremoris	5	LA	1.91	0.36	7.608	16.324	8.72	4.04416666666667	10.3888333333333	5.8005	1.14214287211845			0	0	0	0	0	0	0	0	0	4.45	6.07	A	7.48833333333333	6.38533313073016	2.9	6.34825690824677	0.97292306756563
Lcl-046	nsr- nis-	Lactococcus	lactis	cremoris	5	LA	1.91	0.36	7.608	16.324	8.72	4.04416666666667	10.3888333333333	5.8005	1.14214287211845			0	0	0	0	0	0	0	0	0	4.45	6.07	A	7.48833333333333	5.49287203282822	2.9	5.53388565852092	0.546766172834984
Lcl-046	nsr- nis-	Lactococcus	lactis	cremoris	5	LA	1.91	0.36	7.608	16.324	8.72	4.04416666666667	10.3888333333333	5.8005	1.14214287211845			0	0	0	0	0	0	0	0	0	4.45	6.07	A	7.58833333333333	6.37968530079688	3	6.3426090783135	0.969967582991315
Lcl-046	nsr- nis-	Lactococcus	lactis	cremoris	5	LA	1.91	0.36	7.608	16.324	8.72	4.04416666666667	10.3888333333333	5.8005	1.14214287211845			0	0	0	0	0	0	0	0	0	4.45	6.07	A	7.58833333333333	5.4591325921438	3	5.5001462178365	0.529110471854796
Lcl-046	nsr- nis-	Lactococcus	lactis	cremoris	5	LA	1.91	0.36	7.608	16.324	8.72	4.04416666666667	10.3888333333333	5.8005	1.14214287211845			0	0	0	0	0	0	0	0	0	4.45	6.07	A	7.68833333333333	6.37403747086361	3.1	6.33696124838022	0.967012098417
Lcl-046	nsr- nis-	Lactococcus	lactis	cremoris	5	LA	1.91	0.36	7.608	16.324	8.72	4.04416666666667	10.3888333333333	5.8005	1.14214287211845			0	0	0	0	0	0	0	0	0	4.45	6.07	A	7.68833333333333	5.43805685509735	3.1	5.47907048079005	0.518081631314442
Lcl-046	nsr- nis-	Lactococcus	lactis	cremoris	5	LA	1.91	0.36	7.608	16.324	8.72	4.04416666666667	10.3888333333333	5.8005	1.14214287211845			0	0	0	0	0	0	0	0	0	4.45	6.07	A	7.7883333333333304	6.36651084177863	3.2	6.32943461929524	0.963073446506433
Lcl-046	nsr- nis-	Lactococcus	lactis	cremoris	5	LA	1.91	0.36	7.608	16.324	8.72	4.04416666666667	10.3888333333333	5.8005	1.14214287211845			0	0	0	0	0	0	0	0	0	4.45	6.07	A	7.7883333333333304	5.40147849298773	3.2	5.44249211868044	0.498940335233305
Lcl-046	nsr- nis-	Lactococcus	lactis	cremoris	5	LA	1.91	0.36	7.608	16.324	8.72	4.04416666666667	10.3888333333333	5.8005	1.14214287211845			0	0	0	0	0	0	0	0	0	4.45	6.07	A	7.88833333333333	6.36086301184536	3.3	6.32378678936197	0.960117961932118
Lcl-046	nsr- nis-	Lactococcus	lactis	cremoris	5	LA	1.91	0.36	7.608	16.324	8.72	4.04416666666667	10.3888333333333	5.8005	1.14214287211845			0	0	0	0	0	0	0	0	0	4.45	6.07	A	7.88833333333333	5.3706367191903	3.3	5.411650344883	0.482800970595954
Lcl-046	nsr- nis-	Lactococcus	lactis	cremoris	5	LA	1.91	0.36	7.608	16.324	8.72	4.04416666666667	10.3888333333333	5.8005	1.14214287211845			0	0	0	0	0	0	0	0	0	4.45	6.07	A	7.98833333333333	6.35521518191209	3.4	6.3181389594287	0.957162477357803
Lcl-046	nsr- nis-	Lactococcus	lactis	cremoris	5	LA	1.91	0.36	7.608	16.324	8.72	4.04416666666667	10.3888333333333	5.8005	1.14214287211845			0	0	0	0	0	0	0	0	0	4.45	6.07	A	7.98833333333333	5.35575669978419	3.4	5.39677032547689	0.475014321858327
Lcl-046	nsr- nis-	Lactococcus	lactis	cremoris	5	LA	1.91	0.36	7.608	16.324	8.72	4.04416666666667	10.3888333333333	5.8005	1.14214287211845			0	0	0	0	0	0	0	0	0	4.45	6.07	A	8.08866666666667	6.35521518191209	3.50033333333333	6.3181389594287	0.957162477357803
Lcl-046	nsr- nis-	Lactococcus	lactis	cremoris	5	LA	1.91	0.36	7.608	16.324	8.72	4.04416666666667	10.3888333333333	5.8005	1.14214287211845			0	0	0	0	0	0	0	0	0	4.45	6.07	A	8.08866666666667	5.33706148677537	3.50033333333333	5.37807511246808	0.46523119908128
Lcl-046	nsr- nis-	Lactococcus	lactis	cremoris	5	LA	1.91	0.36	7.608	16.324	8.72	4.04416666666667	10.3888333333333	5.8005	1.14214287211845			0	0	0	0	0	0	0	0	0	4.45	6.07	A	8.18833333333333	6.34718115578878	3.6	6.31010493330539	0.952958306807768
Lcl-046	nsr- nis-	Lactococcus	lactis	cremoris	5	LA	1.91	0.36	7.608	16.324	8.72	4.04416666666667	10.3888333333333	5.8005	1.14214287211845			0	0	0	0	0	0	0	0	0	4.45	6.07	A	8.18833333333333	5.31511498532604	3.6	5.35612861101874	0.453746691357072
Lcl-046	nsr- nis-	Lactococcus	lactis	cremoris	5	LA	1.91	0.36	7.608	16.324	8.72	4.04416666666667	10.3888333333333	5.8005	1.14214287211845			0	0	0	0	0	0	0	0	0	4.45	6.07	A	8.28866666666667	6.34102592881718	3.70033333333333	6.30394970633379	0.949737303593985
Lcl-046	nsr- nis-	Lactococcus	lactis	cremoris	5	LA	1.91	0.36	7.608	16.324	8.72	4.04416666666667	10.3888333333333	5.8005	1.14214287211845			0	0	0	0	0	0	0	0	0	4.45	6.07	A	8.28866666666667	5.29898113661282	3.70033333333333	5.33999476230553	0.445303919255289
Lcl-046	nsr- nis-	Lactococcus	lactis	cremoris	5	LA	1.91	0.36	7.608	16.324	8.72	4.04416666666667	10.3888333333333	5.8005	1.14214287211845			0	0	0	0	0	0	0	0	0	4.45	6.07	A	8.38866666666667	6.33299190269388	3.80033333333333	6.29591568021049	0.945533133043949
Lcl-046	nsr- nis-	Lactococcus	lactis	cremoris	5	LA	1.91	0.36	7.608	16.324	8.72	4.04416666666667	10.3888333333333	5.8005	1.14214287211845			0	0	0	0	0	0	0	0	0	4.45	6.07	A	8.38866666666667	5.28346099065767	3.80033333333333	5.32447461635037	0.437182295108758
Lcl-046	nsr- nis-	Lactococcus	lactis	cremoris	5	LA	1.91	0.36	7.608	16.324	8.72	4.04416666666667	10.3888333333333	5.8005	1.14214287211845			0	0	0	0	0	0	0	0	0	4.45	6.07	A	8.48866666666667	6.32495787657057	3.90033333333333	6.28788165408718	0.941328962493914
Lcl-046	nsr- nis-	Lactococcus	lactis	cremoris	5	LA	1.91	0.36	7.608	16.324	8.72	4.04416666666667	10.3888333333333	5.8005	1.14214287211845			0	0	0	0	0	0	0	0	0	4.45	6.07	A	8.48866666666667	5.24744996384648	3.90033333333333	5.28846358953919	0.418337883095093
Lcl-046	nsr- nis-	Lactococcus	lactis	cremoris	5	LA	1.91	0.36	7.608	16.324	8.72	4.04416666666667	10.3888333333333	5.8005	1.14214287211845			0	0	0	0	0	0	0	0	0	4.45	6.07	A	8.58833333333333	6.31906135744905	4	6.28198513496567	0.938243339960713
Lcl-046	nsr- nis-	Lactococcus	lactis	cremoris	5	LA	1.91	0.36	7.608	16.324	8.72	4.04416666666667	10.3888333333333	5.8005	1.14214287211845			0	0	0	0	0	0	0	0	0	4.45	6.07	A	8.58833333333333	5.20456270923649	4	5.2455763349292	0.395895171304531
Lcl-046	nsr- nis-	Lactococcus	lactis	cremoris	5	LA	1.91	0.36	7.608	16.324	8.72	4.04416666666667	10.3888333333333	5.8005	1.14214287211845			0	0	0	0	0	0	0	0	0	4.45	6.07	A	8.68866666666667	6.31906135744905	4.10033333333333	6.28198513496567	0.938243339960713
Lcl-046	nsr- nis-	Lactococcus	lactis	cremoris	5	LA	1.91	0.36	7.608	16.324	8.72	4.04416666666667	10.3888333333333	5.8005	1.14214287211845			0	0	0	0	0	0	0	0	0	4.45	6.07	A	8.68866666666667	5.15561968676137	4.10033333333333	5.19663331245407	0.370283502813344
Lcl-046	nsr- nis-	Lactococcus	lactis	cremoris	5	LA	1.91	0.36	7.608	16.324	8.72	4.04416666666667	10.3888333333333	5.8005	1.14214287211845			0	0	0	0	0	0	0	0	0	4.45	6.07	A	8.78833333333333	6.31320535322245	4.2	6.27612913073906	0.935178918693901
Lcl-046	nsr- nis-	Lactococcus	lactis	cremoris	5	LA	1.91	0.36	7.608	16.324	8.72	4.04416666666667	10.3888333333333	5.8005	1.14214287211845			0	0	0	0	0	0	0	0	0	4.45	6.07	A	8.78833333333333	5.10440568081791	4.2	5.14541930651061	0.343483438657188
Lcl-046	nsr- nis-	Lactococcus	lactis	cremoris	5	LA	1.91	0.36	7.608	16.324	8.72	4.04416666666667	10.3888333333333	5.8005	1.14214287211845			0	0	0	0	0	0	0	0	0	4.45	6.07	A	8.88866666666667	6.31320535322245	4.30033333333333	6.27612913073906	0.935178918693901
Lcl-046	nsr- nis-	Lactococcus	lactis	cremoris	5	LA	1.91	0.36	7.608	16.324	8.72	4.04416666666667	10.3888333333333	5.8005	1.14214287211845			0	0	0	0	0	0	0	0	0	4.45	6.07	A	8.88866666666667	5.039150207629	4.30033333333333	5.0801638333217	0.309335536422517
Lcl-046	nsr- nis-	Lactococcus	lactis	cremoris	5	LA	1.91	0.36	7.608	16.324	8.72	4.04416666666667	10.3888333333333	5.8005	1.14214287211845			0	0	0	0	0	0	0	0	0	4.45	6.07	A	8.98866666666667	6.31320535322245	4.40033333333333	6.27612913073906	0.935178918693901
Lcl-046	nsr- nis-	Lactococcus	lactis	cremoris	5	LA	1.91	0.36	7.608	16.324	8.72	4.04416666666667	10.3888333333333	5.8005	1.14214287211845			0	0	0	0	0	0	0	0	0	4.45	6.07	A	8.98866666666667	4.97740672879612	4.40033333333333	5.01842035448882	0.277025445394447
Lcl-046	nsr- nis-	Lactococcus	lactis	cremoris	5	LA	1.91	0.36	7.608	16.324	8.72	4.04416666666667	10.3888333333333	5.8005	1.14214287211845			0	0	0	0	0	0	0	0	0	4.45	6.07	A	9.08866666666667	6.31320535322245	4.50033333333333	6.27612913073906	0.935178918693901
Lcl-046	nsr- nis-	Lactococcus	lactis	cremoris	5	LA	1.91	0.36	7.608	16.324	8.72	4.04416666666667	10.3888333333333	5.8005	1.14214287211845			0	0	0	0	0	0	0	0	0	4.45	6.07	A	9.08866666666667	4.92378980375141	4.50033333333333	4.96480342944411	0.248967944236649
Lcl-046	nsr- nis-	Lactococcus	lactis	cremoris	5	LA	1.91	0.36	7.608	16.324	8.72	4.04416666666667	10.3888333333333	5.8005	1.14214287211845			0	0	0	0	0	0	0	0	0	4.45	6.07	A	9.18866666666667	6.31320535322245	4.60033333333333	6.27612913073906	0.935178918693901
Lcl-046	nsr- nis-	Lactococcus	lactis	cremoris	5	LA	1.91	0.36	7.608	16.324	8.72	4.04416666666667	10.3888333333333	5.8005	1.14214287211845			0	0	0	0	0	0	0	0	0	4.45	6.07	A	9.18866666666667	4.87429720330155	4.60033333333333	4.91531082899425	0.223068684007414
Lcl-046	nsr- nis-	Lactococcus	lactis	cremoris	5	LA	1.91	0.36	7.608	16.324	8.72	4.04416666666667	10.3888333333333	5.8005	1.14214287211845			0	0	0	0	0	0	0	0	0	4.45	6.07	A	9.28866666666667	6.30685954417761	4.70033333333333	6.26978332169422	0.931858184719054
Lcl-046	nsr- nis-	Lactococcus	lactis	cremoris	5	LA	1.91	0.36	7.608	16.324	8.72	4.04416666666667	10.3888333333333	5.8005	1.14214287211845			0	0	0	0	0	0	0	0	0	4.45	6.07	A	9.28866666666667	4.8314757021489	4.70033333333333	4.87248932784161	0.200660380712007
Lcl-046	nsr- nis-	Lactococcus	lactis	cremoris	5	LA	1.91	0.36	7.608	16.324	8.72	4.04416666666667	10.3888333333333	5.8005	1.14214287211845			0	0	0	0	0	0	0	0	0	4.45	6.07	A	9.38833333333333	6.301003539951	4.8	6.26392731746761	0.928793763452241
Lcl-046	nsr- nis-	Lactococcus	lactis	cremoris	5	LA	1.91	0.36	7.608	16.324	8.72	4.04416666666667	10.3888333333333	5.8005	1.14214287211845			0	0	0	0	0	0	0	0	0	4.45	6.07	A	9.38833333333333	4.80487230450405	4.8	4.84588593019676	0.186738939681972
Lcl-046	nsr- nis-	Lactococcus	lactis	cremoris	5	LA	1.91	0.36	7.608	16.324	8.72	4.04416666666667	10.3888333333333	5.8005	1.14214287211845			0	0	0	0	0	0	0	0	0	4.45	6.07	A	9.48833333333333	6.28880172667955	4.9	6.25172550419616	0.922408608210582
Lcl-046	nsr- nis-	Lactococcus	lactis	cremoris	5	LA	1.91	0.36	7.608	16.324	8.72	4.04416666666667	10.3888333333333	5.8005	1.14214287211845			0	0	0	0	0	0	0	0	0	4.45	6.07	A	9.48833333333333	4.78323994573427	4.9	4.82425357142697	0.175418821440894
Lcl-046	nsr- nis-	Lactococcus	lactis	cremoris	5	LA	1.91	0.36	7.608	16.324	8.72	4.04416666666667	10.3888333333333	5.8005	1.14214287211845			0	0	0	0	0	0	0	0	0	4.45	6.07	A	9.58833333333333	6.27446240640631	5	6.23738618392292	0.914904904952087
Lcl-046	nsr- nis-	Lactococcus	lactis	cremoris	5	LA	1.91	0.36	7.608	16.324	8.72	4.04416666666667	10.3888333333333	5.8005	1.14214287211845			0	0	0	0	0	0	0	0	0	4.45	6.07	A	9.58833333333333	4.76668542058357	5	4.80769904627627	0.166755911208815
Lcl-046	nsr- nis-	Lactococcus	lactis	cremoris	5	LA	1.91	0.36	7.608	16.324	8.72	4.04416666666667	10.3888333333333	5.8005	1.14214287211845			0	0	0	0	0	0	0	0	0	4.45	6.07	A	9.68833333333333	6.26068182146772	5.1	6.22360559898433	0.907693585437825
Lcl-046	nsr- nis-	Lactococcus	lactis	cremoris	5	LA	1.91	0.36	7.608	16.324	8.72	4.04416666666667	10.3888333333333	5.8005	1.14214287211845			0	0	0	0	0	0	0	0	0	4.45	6.07	A	9.68833333333333	4.74343637218234	5.1	4.78444999787504	0.154589786391115
Lcl-046	nsr- nis-	Lactococcus	lactis	cremoris	5	LA	1.91	0.36	7.608	16.324	8.72	4.04416666666667	10.3888333333333	5.8005	1.14214287211845			0	0	0	0	0	0	0	0	0	4.45	6.07	A	9.78833333333333	6.26068182146772	5.2	6.22360559898433	0.907693585437825
Lcl-046	nsr- nis-	Lactococcus	lactis	cremoris	5	LA	1.91	0.36	7.608	16.324	8.72	4.04416666666667	10.3888333333333	5.8005	1.14214287211845			0	0	0	0	0	0	0	0	0	4.45	6.07	A	9.78833333333333	4.72547718027928	5.2	4.76649080597198	0.145191820222912
Lcl-046	nsr- nis-	Lactococcus	lactis	cremoris	5	LA	1.91	0.36	7.608	16.324	8.72	4.04416666666667	10.3888333333333	5.8005	1.14214287211845			0	0	0	0	0	0	0	0	0	4.45	6.07	A	9.88833333333333	6.25433601242288	5.3	6.21725978993949	0.904372851462977
Lcl-046	nsr- nis-	Lactococcus	lactis	cremoris	5	LA	1.91	0.36	7.608	16.324	8.72	4.04416666666667	10.3888333333333	5.8005	1.14214287211845			0	0	0	0	0	0	0	0	0	4.45	6.07	A	9.88833333333333	4.70320120145704	5.3	4.74421482714975	0.133534898437958
Lcl-046	nsr- nis-	Lactococcus	lactis	cremoris	5	LA	1.91	0.36	7.608	16.324	8.72	4.04416666666667	10.3888333333333	5.8005	1.14214287211845			0	0	0	0	0	0	0	0	0	4.45	6.07	A	9.98833333333333	6.25433601242288	5.4	6.21725978993949	0.904372851462977
Lcl-046	nsr- nis-	Lactococcus	lactis	cremoris	5	LA	1.91	0.36	7.608	16.324	8.72	4.04416666666667	10.3888333333333	5.8005	1.14214287211845			0	0	0	0	0	0	0	0	0	4.45	6.07	A	9.98833333333333	4.69132394649571	5.4	4.73233757218841	0.127319583133112
Lcl-046	nsr- nis-	Lactococcus	lactis	cremoris	5	LA	1.91	0.36	7.608	16.324	8.72	4.04416666666667	10.3888333333333	5.8005	1.14214287211845			0	0	0	0	0	0	0	0	0	4.45	6.07	A	10.0883333333333	6.25433601242288	5.5	6.21725978993949	0.904372851462977
Lcl-046	nsr- nis-	Lactococcus	lactis	cremoris	5	LA	1.91	0.36	7.608	16.324	8.72	4.04416666666667	10.3888333333333	5.8005	1.14214287211845			0	0	0	0	0	0	0	0	0	4.45	6.07	A	10.0883333333333	4.66778653429156	5.5	4.70880015998426	0.115002558805089
Lcl-046	nsr- nis-	Lactococcus	lactis	cremoris	5	LA	1.91	0.36	7.608	16.324	8.72	4.04416666666667	10.3888333333333	5.8005	1.14214287211845			0	0	0	0	0	0	0	0	0	4.45	6.07	A	10.1883333333333	6.25591478409002	5.6	6.21883856160663	0.90519901573558
Lcl-046	nsr- nis-	Lactococcus	lactis	cremoris	5	LA	1.91	0.36	7.608	16.324	8.72	4.04416666666667	10.3888333333333	5.8005	1.14214287211845			0	0	0	0	0	0	0	0	0	4.45	6.07	A	10.1883333333333	4.66128640123657	5.6	4.70230002692927	0.111601067754193
Lcl-046	nsr- nis-	Lactococcus	lactis	cremoris	5	LA	1.91	0.36	7.608	16.324	8.72	4.04416666666667	10.3888333333333	5.8005	1.14214287211845			0	0	0	0	0	0	0	0	0	4.45	6.07	A	10.2883333333333	6.25591478409002	5.7	6.21883856160663	0.90519901573558
Lcl-046	nsr- nis-	Lactococcus	lactis	cremoris	5	LA	1.91	0.36	7.608	16.324	8.72	4.04416666666667	10.3888333333333	5.8005	1.14214287211845			0	0	0	0	0	0	0	0	0	4.45	6.07	A	10.2883333333333	4.64962624399376	5.7	4.69063986968646	0.105499358731017
Lcl-046	nsr- nis-	Lactococcus	lactis	cremoris	5	LA	1.91	0.36	7.608	16.324	8.72	4.04416666666667	10.3888333333333	5.8005	1.14214287211845			0	0	0	0	0	0	0	0	0	4.45	6.07	A	10.3888333333333	6.25591478409002	5.8005	6.21883856160663	0.90519901573558
Lcl-046	nsr- nis-	Lactococcus	lactis	cremoris	5	LA	1.91	0.36	7.608	16.324	8.72	4.04416666666667	10.3888333333333	5.8005	1.14214287211845			0	0	0	0	0	0	0	0	0	4.45	6.07	A	10.3888333333333	4.64744289785794	5.8005	4.68845652355065	0.104356823296872
Lcl-046	nsr- nis-	Lactococcus	lactis	cremoris	5	LA	1.91	0.36	7.608	16.324	8.72	4.04416666666667	10.3888333333333	5.8005	1.14214287211845			0	0	0	0	0	0	0	0	0	4.45	6.07	A	10.4886666666667	6.24805406641205	5.90033333333333	6.21097784392866	0.901085536733068
Lcl-046	nsr- nis-	Lactococcus	lactis	cremoris	5	LA	1.91	0.36	7.608	16.324	8.72	4.04416666666667	10.3888333333333	5.8005	1.14214287211845			0	0	0	0	0	0	0	0	0	4.45	6.07	A	10.4886666666667	4.64094276480296	5.90033333333333	4.68195639049566	0.100955332245977
Lcl-046	nsr- nis-	Lactococcus	lactis	cremoris	5	LA	1.91	0.36	7.608	16.324	8.72	4.04416666666667	10.3888333333333	5.8005	1.14214287211845			0	0	0	0	0	0	0	0	0	4.45	6.07	A	10.5883333333333	6.24175873080082	6	6.20468250831743	0.897791215284128
Lcl-046	nsr- nis-	Lactococcus	lactis	cremoris	5	LA	1.91	0.36	7.608	16.324	8.72	4.04416666666667	10.3888333333333	5.8005	1.14214287211845			0	0	0	0	0	0	0	0	0	4.45	6.07	A	10.5883333333333	4.63644588371442	6	4.67745950940712	0.0986021341421528
Lcl-046	nsr- nis-	Lactococcus	lactis	cremoris	5	LA	1.91	0.36	7.608	16.324	8.72	4.04416666666667	10.3888333333333	5.8005	1.14214287211845			0	0	0	0	0	0	0	0	0	4.45	6.07	A	10.6886666666667	6.23546339518958	6.10033333333333	6.19838717270619	0.894496893835189
Lcl-046	nsr- nis-	Lactococcus	lactis	cremoris	5	LA	1.91	0.36	7.608	16.324	8.72	4.04416666666667	10.3888333333333	5.8005	1.14214287211845			0	0	0	0	0	0	0	0	0	4.45	6.07	A	10.6886666666667	4.62678897843806	6.10033333333333	4.66780260413076	0.0935487180660481
Lcl-046	nsr- nis-	Lactococcus	lactis	cremoris	5	LA	1.91	0.36	7.608	16.324	8.72	4.04416666666667	10.3888333333333	5.8005	1.14214287211845			0	0	0	0	0	0	0	0	0	4.45	6.07	A	10.7886666666667	6.22916805957834	6.20033333333333	6.19209183709495	0.891202572386249
Lcl-046	nsr- nis-	Lactococcus	lactis	cremoris	5	LA	1.91	0.36	7.608	16.324	8.72	4.04416666666667	10.3888333333333	5.8005	1.14214287211845			0	0	0	0	0	0	0	0	0	4.45	6.07	A	10.7886666666667	4.6200177054937	6.20033333333333	4.66103133118641	0.0900053407030672
Lcl-046	nsr- nis-	Lactococcus	lactis	cremoris	5	LA	1.91	0.36	7.608	16.324	8.72	4.04416666666667	10.3888333333333	5.8005	1.14214287211845			0	0	0	0	0	0	0	0	0	4.45	6.07	A	10.8886666666667	6.22287272396711	6.30033333333333	6.18579650148372	0.88790825093731
Lcl-046	nsr- nis-	Lactococcus	lactis	cremoris	5	LA	1.91	0.36	7.608	16.324	8.72	4.04416666666667	10.3888333333333	5.8005	1.14214287211845			0	0	0	0	0	0	0	0	0	4.45	6.07	A	10.8886666666667	4.61036080021734	6.30033333333333	4.65137442591004	0.0849519246269626
Lcl-046	nsr- nis-	Lactococcus	lactis	cremoris	5	LA	1.91	0.36	7.608	16.324	8.72	4.04416666666667	10.3888333333333	5.8005	1.14214287211845			0	0	0	0	0	0	0	0	0	4.45	6.07	A	10.9886666666667	6.22443810603384	6.40033333333333	6.18736188355045	0.888727408490883
Lcl-046	nsr- nis-	Lactococcus	lactis	cremoris	5	LA	1.91	0.36	7.608	16.324	8.72	4.04416666666667	10.3888333333333	5.8005	1.14214287211845			0	0	0	0	0	0	0	0	0	4.45	6.07	A	10.9886666666667	4.59842950308516	6.40033333333333	4.63944312877786	0.0787083292917013
Lcl-046	nsr- nis-	Lactococcus	lactis	cremoris	5	LA	1.91	0.36	7.608	16.324	8.72	4.04416666666667	10.3888333333333	5.8005	1.14214287211845			0	0	0	0	0	0	0	0	0	4.45	6.07	A	11.0886666666667	6.22443810603384	6.50033333333333	6.18736188355045	0.888727408490883
Lcl-046	nsr- nis-	Lactococcus	lactis	cremoris	5	LA	1.91	0.36	7.608	16.324	8.72	4.04416666666667	10.3888333333333	5.8005	1.14214287211845			0	0	0	0	0	0	0	0	0	4.45	6.07	A	11.0886666666667	4.59386325017213	6.50033333333333	4.63487687586483	0.0763188292170995
Lcl-046	nsr- nis-	Lactococcus	lactis	cremoris	5	LA	1.91	0.36	7.608	16.324	8.72	4.04416666666667	10.3888333333333	5.8005	1.14214287211845			0	0	0	0	0	0	0	0	0	4.45	6.07	A	11.1886666666667	6.21535673893727	6.60033333333333	6.17828051645388	0.883975169014
Lcl-046	nsr- nis-	Lactococcus	lactis	cremoris	5	LA	1.91	0.36	7.608	16.324	8.72	4.04416666666667	10.3888333333333	5.8005	1.14214287211845			0	0	0	0	0	0	0	0	0	4.45	6.07	A	11.1886666666667	4.58929699725909	6.60033333333333	4.63031062295179	0.0739293291424978
Lcl-046	nsr- nis-	Lactococcus	lactis	cremoris	5	LA	1.91	0.36	7.608	16.324	8.72	4.04416666666667	10.3888333333333	5.8005	1.14214287211845			0	0	0	0	0	0	0	0	0	4.45	6.07	A	11.2886666666667	6.20911636660519	6.70033333333333	6.17204014412181	0.880709609607411
Lcl-046	nsr- nis-	Lactococcus	lactis	cremoris	5	LA	1.91	0.36	7.608	16.324	8.72	4.04416666666667	10.3888333333333	5.8005	1.14214287211845			0	0	0	0	0	0	0	0	0	4.45	6.07	A	11.2886666666667	4.59157138911491	6.70033333333333	4.63258501480762	0.0751195084016545
Lcl-046	nsr- nis-	Lactococcus	lactis	cremoris	5	LA	1.91	0.36	7.608	16.324	8.72	4.04416666666667	10.3888333333333	5.8005	1.14214287211845			0	0	0	0	0	0	0	0	0	4.45	6.07	A	11.3883333333333	6.20911636660519	6.8	6.17204014412181	0.880709609607411
Lcl-046	nsr- nis-	Lactococcus	lactis	cremoris	5	LA	1.91	0.36	7.608	16.324	8.72	4.04416666666667	10.3888333333333	5.8005	1.14214287211845			0	0	0	0	0	0	0	0	0	4.45	6.07	A	11.3883333333333	4.59157138911491	6.8	4.63258501480762	0.0751195084016545
Lcl-046	nsr- nis-	Lactococcus	lactis	cremoris	5	LA	1.91	0.36	7.608	16.324	8.72	4.04416666666667	10.3888333333333	5.8005	1.14214287211845			0	0	0	0	0	0	0	0	0	4.45	6.07	A	11.4883333333333	6.20132484545361	6.9	6.16424862297023	0.876632340842945
Lcl-046	nsr- nis-	Lactococcus	lactis	cremoris	5	LA	1.91	0.36	7.608	16.324	8.72	4.04416666666667	10.3888333333333	5.8005	1.14214287211845			0	0	0	0	0	0	0	0	0	4.45	6.07	A	11.4883333333333	4.58229785960114	6.9	4.62331148529384	0.0702667111766626
Lcl-046	nsr- nis-	Lactococcus	lactis	cremoris	5	LA	1.91	0.36	7.608	16.324	8.72	4.04416666666667	10.3888333333333	5.8005	1.14214287211845			0	0	0	0	0	0	0	0	0	4.45	6.07	A	11.5883333333333	6.19508447312155	7	6.15800825063816	0.873366781436356
Lcl-046	nsr- nis-	Lactococcus	lactis	cremoris	5	LA	1.91	0.36	7.608	16.324	8.72	4.04416666666667	10.3888333333333	5.8005	1.14214287211845			0	0	0	0	0	0	0	0	0	4.45	6.07	A	11.5883333333333	4.57531619114458	7	4.61632981683728	0.0666132347671153
Lcl-046	nsr- nis-	Lactococcus	lactis	cremoris	5	LA	1.91	0.36	7.608	16.324	8.72	4.04416666666667	10.3888333333333	5.8005	1.14214287211845			0	0	0	0	0	0	0	0	0	4.45	6.07	A	11.6883333333333	6.19148642302224	7.1	6.15441020053885	0.871483937637633
Lcl-046	nsr- nis-	Lactococcus	lactis	cremoris	5	LA	1.91	0.36	7.608	16.324	8.72	4.04416666666667	10.3888333333333	5.8005	1.14214287211845			0	0	0	0	0	0	0	0	0	4.45	6.07	A	11.6883333333333	4.56833452268802	7.1	4.60934814838072	0.062959758357568
Lcl-046	nsr- nis-	Lactococcus	lactis	cremoris	5	LA	1.91	0.36	7.608	16.324	8.72	4.04416666666667	10.3888333333333	5.8005	1.14214287211845			0	0	0	0	0	0	0	0	0	4.45	6.07	A	11.7883333333333	6.19772679535431	7.2	6.16065057287092	0.874749497044222
Lcl-046	nsr- nis-	Lactococcus	lactis	cremoris	5	LA	1.91	0.36	7.608	16.324	8.72	4.04416666666667	10.3888333333333	5.8005	1.14214287211845			0	0	0	0	0	0	0	0	0	4.45	6.07	A	11.7883333333333	4.55678660131842	7.2	4.59780022701112	0.0569167818734191
Lcl-046	nsr- nis-	Lactococcus	lactis	cremoris	5	LA	1.91	0.36	7.608	16.324	8.72	4.04416666666667	10.3888333333333	5.8005	1.14214287211845			0	0	0	0	0	0	0	0	0	4.45	6.07	A	11.8883333333333	6.19148642302224	7.3	6.15441020053885	0.871483937637633
Lcl-046	nsr- nis-	Lactococcus	lactis	cremoris	5	LA	1.91	0.36	7.608	16.324	8.72	4.04416666666667	10.3888333333333	5.8005	1.14214287211845			0	0	0	0	0	0	0	0	0	4.45	6.07	A	11.8883333333333	4.54523867994883	7.3	4.58625230564153	0.0508738053892701
Lcl-046	nsr- nis-	Lactococcus	lactis	cremoris	5	LA	1.91	0.36	7.608	16.324	8.72	4.04416666666667	10.3888333333333	5.8005	1.14214287211845			0	0	0	0	0	0	0	0	0	4.45	6.07	A	11.9883333333333	6.19303757184175	7.4	6.15596134935836	0.872295646995509
Lcl-046	nsr- nis-	Lactococcus	lactis	cremoris	5	LA	1.91	0.36	7.608	16.324	8.72	4.04416666666667	10.3888333333333	5.8005	1.14214287211845			0	0	0	0	0	0	0	0	0	4.45	6.07	A	11.9883333333333	4.54523867994883	7.4	4.58625230564153	0.0508738053892701
Lcl-046	nsr- nis-	Lactococcus	lactis	cremoris	5	LA	1.91	0.36	7.608	16.324	8.72	4.04416666666667	10.3888333333333	5.8005	1.14214287211845			0	0	0	0	0	0	0	0	0	4.45	6.07	A	12.0883333333333	6.19303757184175	7.5	6.15596134935836	0.872295646995509
Lcl-046	nsr- nis-	Lactococcus	lactis	cremoris	5	LA	1.91	0.36	7.608	16.324	8.72	4.04416666666667	10.3888333333333	5.8005	1.14214287211845			0	0	0	0	0	0	0	0	0	4.45	6.07	A	12.0883333333333	4.54523867994883	7.5	4.58625230564153	0.0508738053892701
Lcl-046	nsr- nis-	Lactococcus	lactis	cremoris	5	LA	1.91	0.36	7.608	16.324	8.72	4.04416666666667	10.3888333333333	5.8005	1.14214287211845			0	0	0	0	0	0	0	0	0	4.45	6.07	A	12.1883333333333	6.20077200192201	7.6	6.16369577943862	0.876343040253342
Lcl-046	nsr- nis-	Lactococcus	lactis	cremoris	5	LA	1.91	0.36	7.608	16.324	8.72	4.04416666666667	10.3888333333333	5.8005	1.14214287211845			0	0	0	0	0	0	0	0	0	4.45	6.07	A	12.1883333333333	4.54523867994883	7.6	4.58625230564153	0.0508738053892701
Lcl-046	nsr- nis-	Lactococcus	lactis	cremoris	5	LA	1.91	0.36	7.608	16.324	8.72	4.04416666666667	10.3888333333333	5.8005	1.14214287211845			0	0	0	0	0	0	0	0	0	4.45	6.07	A	12.2883333333333	6.19582701480638	7.7	6.15875079232299	0.873755350235568
Lcl-046	nsr- nis-	Lactococcus	lactis	cremoris	5	LA	1.91	0.36	7.608	16.324	8.72	4.04416666666667	10.3888333333333	5.8005	1.14214287211845			0	0	0	0	0	0	0	0	0	4.45	6.07	A	12.2883333333333	4.54991089135695	7.7	4.59092451704965	0.0533187530785212
Lcl-046	nsr- nis-	Lactococcus	lactis	cremoris	5	LA	1.91	0.36	7.608	16.324	8.72	4.04416666666667	10.3888333333333	5.8005	1.14214287211845			0	0	0	0	0	0	0	0	0	4.45	6.07	A	12.3883333333333	6.18785206356884	7.8	6.15077584108545	0.869582093313538
Lcl-046	nsr- nis-	Lactococcus	lactis	cremoris	5	LA	1.91	0.36	7.608	16.324	8.72	4.04416666666667	10.3888333333333	5.8005	1.14214287211845			0	0	0	0	0	0	0	0	0	4.45	6.07	A	12.3883333333333	4.54991089135695	7.8	4.59092451704965	0.0533187530785212
Lcl-046	nsr- nis-	Lactococcus	lactis	cremoris	5	LA	1.91	0.36	7.608	16.324	8.72	4.04416666666667	10.3888333333333	5.8005	1.14214287211845			0	0	0	0	0	0	0	0	0	4.45	6.07	A	12.4883333333333	6.1811567794372	7.9	6.14408055695381	0.866078480562181
Lcl-046	nsr- nis-	Lactococcus	lactis	cremoris	5	LA	1.91	0.36	7.608	16.324	8.72	4.04416666666667	10.3888333333333	5.8005	1.14214287211845			0	0	0	0	0	0	0	0	0	4.45	6.07	A	12.4883333333333	4.54675619366956	7.9	4.58776981936226	0.0516679136478259
Lcl-046	nsr- nis-	Lactococcus	lactis	cremoris	5	LA	1.91	0.36	7.608	16.324	8.72	4.04416666666667	10.3888333333333	5.8005	1.14214287211845			0	0	0	0	0	0	0	0	0	4.45	6.07	A	12.5886666666667	6.17318182819965	8.00033333333333	6.13610560571626	0.86190522364015
Lcl-046	nsr- nis-	Lactococcus	lactis	cremoris	5	LA	1.91	0.36	7.608	16.324	8.72	4.04416666666667	10.3888333333333	5.8005	1.14214287211845			0	0	0	0	0	0	0	0	0	4.45	6.07	A	12.5886666666667	4.54360149598217	8.00033333333333	4.58461512167487	0.0500170742171306
Lcl-046	nsr- nis-	Lactococcus	lactis	cremoris	5	LA	1.91	0.36	7.608	16.324	8.72	4.04416666666667	10.3888333333333	5.8005	1.14214287211845			0	0	0	0	0	0	0	0	0	4.45	6.07	A	12.6886666666667	6.16519115885157	8.10033333333334	6.12811493636818	0.857723741499978
Lcl-046	nsr- nis-	Lactococcus	lactis	cremoris	5	LA	1.91	0.36	7.608	16.324	8.72	4.04416666666667	10.3888333333333	5.8005	1.14214287211845			0	0	0	0	0	0	0	0	0	4.45	6.07	A	12.6886666666667	4.54044679829478	8.10033333333334	4.58146042398748	0.0483662347864357
Lcl-046	nsr- nis-	Lactococcus	lactis	cremoris	5	LA	1.91	0.36	7.608	16.324	8.72	4.04416666666667	10.3888333333333	5.8005	1.14214287211845			0	0	0	0	0	0	0	0	0	4.45	6.07	A	12.7886666666667	6.15720048950349	8.20033333333333	6.1201242670201	0.853542259359805
Lcl-046	nsr- nis-	Lactococcus	lactis	cremoris	5	LA	1.91	0.36	7.608	16.324	8.72	4.04416666666667	10.3888333333333	5.8005	1.14214287211845			0	0	0	0	0	0	0	0	0	4.45	6.07	A	12.7886666666667	4.53103045914448	8.20033333333333	4.57204408483718	0.0434387059064886
Lcl-046	nsr- nis-	Lactococcus	lactis	cremoris	5	LA	1.91	0.36	7.608	16.324	8.72	4.04416666666667	10.3888333333333	5.8005	1.14214287211845			0	0	0	0	0	0	0	0	0	4.45	6.07	A	12.8883333333333	6.15848015660939	8.3	6.121403934126	0.854211903530478
Lcl-046	nsr- nis-	Lactococcus	lactis	cremoris	5	LA	1.91	0.36	7.608	16.324	8.72	4.04416666666667	10.3888333333333	5.8005	1.14214287211845			0	0	0	0	0	0	0	0	0	4.45	6.07	A	12.8883333333333	4.52787576145709	8.3	4.56888938714979	0.0417878664757933
Lcl-046	nsr- nis-	Lactococcus	lactis	cremoris	5	LA	1.91	0.36	7.608	16.324	8.72	4.04416666666667	10.3888333333333	5.8005	1.14214287211845			0	0	0	0	0	0	0	0	0	4.45	6.07	A	12.9883333333333	6.15848015660939	8.4	6.121403934126	0.854211903530478
Lcl-046	nsr- nis-	Lactococcus	lactis	cremoris	5	LA	1.91	0.36	7.608	16.324	8.72	4.04416666666667	10.3888333333333	5.8005	1.14214287211845			0	0	0	0	0	0	0	0	0	4.45	6.07	A	12.9883333333333	4.5262863314023	8.4	4.567299957095	0.0409561247157926
Lcl-046	nsr- nis-	Lactococcus	lactis	cremoris	5	LA	1.91	0.36	7.608	16.324	8.72	4.04416666666667	10.3888333333333	5.8005	1.14214287211845			0	0	0	0	0	0	0	0	0	4.45	6.07	A	13.0886666666667	6.1597598237153	8.50033333333333	6.12268360123191	0.854881547701151
Lcl-046	nsr- nis-	Lactococcus	lactis	cremoris	5	LA	1.91	0.36	7.608	16.324	8.72	4.04416666666667	10.3888333333333	5.8005	1.14214287211845			0	0	0	0	0	0	0	0	0	4.45	6.07	A	13.0886666666667	4.5262863314023	8.50033333333333	4.567299957095	0.0409561247157926
Lcl-046	nsr- nis-	Lactococcus	lactis	cremoris	5	LA	1.91	0.36	7.608	16.324	8.72	4.04416666666667	10.3888333333333	5.8005	1.14214287211845			0	0	0	0	0	0	0	0	0	4.45	6.07	A	13.1886666666667	6.1597598237153	8.60033333333334	6.12268360123191	0.854881547701151
Lcl-046	nsr- nis-	Lactococcus	lactis	cremoris	5	LA	1.91	0.36	7.608	16.324	8.72	4.04416666666667	10.3888333333333	5.8005	1.14214287211845			0	0	0	0	0	0	0	0	0	4.45	6.07	A	13.1886666666667	4.52469690134751	8.60033333333334	4.56571052704021	0.0401243829557924
Lcl-046	nsr- nis-	Lactococcus	lactis	cremoris	5	LA	1.91	0.36	7.608	16.324	8.72	4.04416666666667	10.3888333333333	5.8005	1.14214287211845			0	0	0	0	0	0	0	0	0	4.45	6.07	A	13.2886666666667	6.1597598237153	8.70033333333333	6.12268360123191	0.854881547701151
Lcl-046	nsr- nis-	Lactococcus	lactis	cremoris	5	LA	1.91	0.36	7.608	16.324	8.72	4.04416666666667	10.3888333333333	5.8005	1.14214287211845			0	0	0	0	0	0	0	0	0	4.45	6.07	A	13.2886666666667	4.51416632763043	8.70033333333333	4.55517995332313	0.0346137800256003
Lcl-046	nsr- nis-	Lactococcus	lactis	cremoris	5	LA	1.91	0.36	7.608	16.324	8.72	4.04416666666667	10.3888333333333	5.8005	1.14214287211845			0	0	0	0	0	0	0	0	0	4.45	6.07	A	13.3886666666667	6.1597598237153	8.80033333333333	6.12268360123191	0.854881547701151
Lcl-046	nsr- nis-	Lactococcus	lactis	cremoris	5	LA	1.91	0.36	7.608	16.324	8.72	4.04416666666667	10.3888333333333	5.8005	1.14214287211845			0	0	0	0	0	0	0	0	0	4.45	6.07	A	13.3886666666667	4.50937368387249	8.80033333333333	4.55038730956519	0.0321058106171516
Lcl-046	nsr- nis-	Lactococcus	lactis	cremoris	5	LA	1.91	0.36	7.608	16.324	8.72	4.04416666666667	10.3888333333333	5.8005	1.14214287211845			0	0	0	0	0	0	0	0	0	4.45	6.07	A	13.4886666666667	6.16129878888452	8.90033333333333	6.12422256640113	0.855686881408391
Lcl-046	nsr- nis-	Lactococcus	lactis	cremoris	5	LA	1.91	0.36	7.608	16.324	8.72	4.04416666666667	10.3888333333333	5.8005	1.14214287211845			0	0	0	0	0	0	0	0	0	4.45	6.07	A	13.4886666666667	4.50937368387249	8.90033333333333	4.55038730956519	0.0321058106171516
Lcl-046	nsr- nis-	Lactococcus	lactis	cremoris	5	LA	1.91	0.36	7.608	16.324	8.72	4.04416666666667	10.3888333333333	5.8005	1.14214287211845			0	0	0	0	0	0	0	0	0	4.45	6.07	A	13.5883333333333	6.16129878888452	9	6.12422256640113	0.855686881408391
Lcl-046	nsr- nis-	Lactococcus	lactis	cremoris	5	LA	1.91	0.36	7.608	16.324	8.72	4.04416666666667	10.3888333333333	5.8005	1.14214287211845			0	0	0	0	0	0	0	0	0	4.45	6.07	A	13.5883333333333	4.5077842538177	9	4.5487978795104	0.0312740688571514
Lcl-046	nsr- nis-	Lactococcus	lactis	cremoris	5	LA	1.91	0.36	7.608	16.324	8.72	4.04416666666667	10.3888333333333	5.8005	1.14214287211845			0	0	0	0	0	0	0	0	0	4.45	6.07	A	13.6886666666667	6.16129878888452	9.10033333333334	6.12422256640113	0.855686881408391
Lcl-046	nsr- nis-	Lactococcus	lactis	cremoris	5	LA	1.91	0.36	7.608	16.324	8.72	4.04416666666667	10.3888333333333	5.8005	1.14214287211845			0	0	0	0	0	0	0	0	0	4.45	6.07	A	13.6886666666667	4.51252838155988	9.10033333333334	4.55354200725258	0.0337566500478469
Lcl-046	nsr- nis-	Lactococcus	lactis	cremoris	5	LA	1.91	0.36	7.608	16.324	8.72	4.04416666666667	10.3888333333333	5.8005	1.14214287211845			0	0	0	0	0	0	0	0	0	4.45	6.07	A	13.7886666666667	6.16283775405373	9.20033333333333	6.12576153157034	0.856492215115631
Lcl-046	nsr- nis-	Lactococcus	lactis	cremoris	5	LA	1.91	0.36	7.608	16.324	8.72	4.04416666666667	10.3888333333333	5.8005	1.14214287211845			0	0	0	0	0	0	0	0	0	4.45	6.07	A	13.7886666666667	4.51985574157382	9.20033333333333	4.56086936726652	0.0375910253295909
Lcl-046	nsr- nis-	Lactococcus	lactis	cremoris	5	LA	1.91	0.36	7.608	16.324	8.72	4.04416666666667	10.3888333333333	5.8005	1.14214287211845			0	0	0	0	0	0	0	0	0	4.45	6.07	A	13.8886666666667	6.16283775405373	9.30033333333333	6.12576153157034	0.856492215115631
Lcl-046	nsr- nis-	Lactococcus	lactis	cremoris	5	LA	1.91	0.36	7.608	16.324	8.72	4.04416666666667	10.3888333333333	5.8005	1.14214287211845			0	0	0	0	0	0	0	0	0	4.45	6.07	A	13.8886666666667	4.51985574157382	9.30033333333333	4.56086936726652	0.0375910253295909
Lcl-046	nsr- nis-	Lactococcus	lactis	cremoris	5	LA	1.91	0.36	7.608	16.324	8.72	4.04416666666667	10.3888333333333	5.8005	1.14214287211845			0	0	0	0	0	0	0	0	0	4.45	6.07	A	13.9886666666667	6.16283775405373	9.40033333333333	6.12576153157034	0.856492215115631
Lcl-046	nsr- nis-	Lactococcus	lactis	cremoris	5	LA	1.91	0.36	7.608	16.324	8.72	4.04416666666667	10.3888333333333	5.8005	1.14214287211845			0	0	0	0	0	0	0	0	0	4.45	6.07	A	13.9886666666667	4.51665252787067	9.40033333333333	4.55766615356337	0.0359147976811433
Lcl-046	nsr- nis-	Lactococcus	lactis	cremoris	5	LA	1.91	0.36	7.608	16.324	8.72	4.04416666666667	10.3888333333333	5.8005	1.14214287211845			0	0	0	0	0	0	0	0	0	4.45	6.07	A	14.0883333333333	6.16437671922295	9.5	6.12730049673956	0.85729754882287
Lcl-046	nsr- nis-	Lactococcus	lactis	cremoris	5	LA	1.91	0.36	7.608	16.324	8.72	4.04416666666667	10.3888333333333	5.8005	1.14214287211845			0	0	0	0	0	0	0	0	0	4.45	6.07	A	14.0883333333333	4.50939923809577	9.5	4.55041286378848	0.0321191830298502
Lcl-046	nsr- nis-	Lactococcus	lactis	cremoris	5	LA	1.91	0.36	7.608	16.324	8.72	4.04416666666667	10.3888333333333	5.8005	1.14214287211845			0	0	0	0	0	0	0	0	0	4.45	6.07	A	14.1883333333333	6.16591568439216	9.6	6.12883946190877	0.85810288253011
Lcl-046	nsr- nis-	Lactococcus	lactis	cremoris	5	LA	1.91	0.36	7.608	16.324	8.72	4.04416666666667	10.3888333333333	5.8005	1.14214287211845			0	0	0	0	0	0	0	0	0	4.45	6.07	A	14.1883333333333	4.50145189665045	9.6	4.54246552234315	0.0279603741907066
Lcl-046	nsr- nis-	Lactococcus	lactis	cremoris	5	LA	1.91	0.36	7.608	16.324	8.72	4.04416666666667	10.3888333333333	5.8005	1.14214287211845			0	0	0	0	0	0	0	0	0	4.45	6.07	A	14.2883333333333	6.16591568439216	9.7	6.12883946190877	0.85810288253011
Lcl-046	nsr- nis-	Lactococcus	lactis	cremoris	5	LA	1.91	0.36	7.608	16.324	8.72	4.04416666666667	10.3888333333333	5.8005	1.14214287211845			0	0	0	0	0	0	0	0	0	4.45	6.07	A	14.2883333333333	4.50145189665045	9.7	4.54246552234315	0.0279603741907066
Lcl-046	nsr- nis-	Lactococcus	lactis	cremoris	5	LA	1.91	0.36	7.608	16.324	8.72	4.04416666666667	10.3888333333333	5.8005	1.14214287211845			0	0	0	0	0	0	0	0	0	4.45	6.07	A	14.3883333333333	6.16745464956137	9.8	6.13037842707799	0.85890821623735
Lcl-046	nsr- nis-	Lactococcus	lactis	cremoris	5	LA	1.91	0.36	7.608	16.324	8.72	4.04416666666667	10.3888333333333	5.8005	1.14214287211845			0	0	0	0	0	0	0	0	0	4.45	6.07	A	14.3883333333333	4.50145189665045	9.8	4.54246552234315	0.0279603741907066
Lcl-046	nsr- nis-	Lactococcus	lactis	cremoris	5	LA	1.91	0.36	7.608	16.324	8.72	4.04416666666667	10.3888333333333	5.8005	1.14214287211845			0	0	0	0	0	0	0	0	0	4.45	6.07	A	14.4886666666667	6.16745464956137	9.90033333333333	6.13037842707799	0.85890821623735
Lcl-046	nsr- nis-	Lactococcus	lactis	cremoris	5	LA	1.91	0.36	7.608	16.324	8.72	4.04416666666667	10.3888333333333	5.8005	1.14214287211845			0	0	0	0	0	0	0	0	0	4.45	6.07	A	14.4886666666667	4.50939923809577	9.90033333333333	4.55041286378848	0.0321191830298502
Lcl-046	nsr- nis-	Lactococcus	lactis	cremoris	5	LA	1.91	0.36	7.608	16.324	8.72	4.04416666666667	10.3888333333333	5.8005	1.14214287211845			0	0	0	0	0	0	0	0	0	4.45	6.07	A	14.5886666666667	6.16745464956137	10.0003333333333	6.13037842707799	0.85890821623735
Lcl-046	nsr- nis-	Lactococcus	lactis	cremoris	5	LA	1.91	0.36	7.608	16.324	8.72	4.04416666666667	10.3888333333333	5.8005	1.14214287211845			0	0	0	0	0	0	0	0	0	4.45	6.07	A	14.5886666666667	4.51344931416752	10.0003333333333	4.55446293986023	0.0342385700326952
Lcl-046	nsr- nis-	Lactococcus	lactis	cremoris	5	LA	1.91	0.36	7.608	16.324	8.72	4.04416666666667	10.3888333333333	5.8005	1.14214287211845			0	0	0	0	0	0	0	0	0	4.45	6.07	A	14.6888333333333	6.15954273280708	10.1005	6.1224665103237	0.854767944983286
Lcl-046	nsr- nis-	Lactococcus	lactis	cremoris	5	LA	1.91	0.36	7.608	16.324	8.72	4.04416666666667	10.3888333333333	5.8005	1.14214287211845			0	0	0	0	0	0	0	0	0	4.45	6.07	A	14.6888333333333	4.51344931416752	10.1005	4.55446293986023	0.0342385700326952
Lcl-046	nsr- nis-	Lactococcus	lactis	cremoris	5	LA	1.91	0.36	7.608	16.324	8.72	4.04416666666667	10.3888333333333	5.8005	1.14214287211845			0	0	0	0	0	0	0	0	0	4.45	6.07	A	14.7883333333333	6.1516308160528	10.2	6.11455459356941	0.850627673729223
Lcl-046	nsr- nis-	Lactococcus	lactis	cremoris	5	LA	1.91	0.36	7.608	16.324	8.72	4.04416666666667	10.3888333333333	5.8005	1.14214287211845			0	0	0	0	0	0	0	0	0	4.45	6.07	A	14.7883333333333	4.51344931416752	10.2	4.55446293986023	0.0342385700326952
Lcl-046	nsr- nis-	Lactococcus	lactis	cremoris	5	LA	1.91	0.36	7.608	16.324	8.72	4.04416666666667	10.3888333333333	5.8005	1.14214287211845			0	0	0	0	0	0	0	0	0	4.45	6.07	A	14.8883333333333	6.1516308160528	10.3	6.11455459356941	0.850627673729223
Lcl-046	nsr- nis-	Lactococcus	lactis	cremoris	5	LA	1.91	0.36	7.608	16.324	8.72	4.04416666666667	10.3888333333333	5.8005	1.14214287211845			0	0	0	0	0	0	0	0	0	4.45	6.07	A	14.8883333333333	4.50612195415359	10.3	4.54713557984629	0.0304041947509512
Lcl-046	nsr- nis-	Lactococcus	lactis	cremoris	5	LA	1.91	0.36	7.608	16.324	8.72	4.04416666666667	10.3888333333333	5.8005	1.14214287211845			0	0	0	0	0	0	0	0	0	4.45	6.07	A	14.9883333333333	6.14498843180215	10.4	6.10791220931876	0.847151743253023
Lcl-046	nsr- nis-	Lactococcus	lactis	cremoris	5	LA	1.91	0.36	7.608	16.324	8.72	4.04416666666667	10.3888333333333	5.8005	1.14214287211845			0	0	0	0	0	0	0	0	0	4.45	6.07	A	14.9883333333333	4.49084725269433	10.4	4.53186087838703	0.0224110106300636
Lcl-046	nsr- nis-	Lactococcus	lactis	cremoris	5	LA	1.91	0.36	7.608	16.324	8.72	4.04416666666667	10.3888333333333	5.8005	1.14214287211845			0	0	0	0	0	0	0	0	0	4.45	6.07	A	15.0883333333333	6.1383460475515	10.5	6.10126982506812	0.843675812776824
Lcl-046	nsr- nis-	Lactococcus	lactis	cremoris	5	LA	1.91	0.36	7.608	16.324	8.72	4.04416666666667	10.3888333333333	5.8005	1.14214287211845			0	0	0	0	0	0	0	0	0	4.45	6.07	A	15.0883333333333	4.47854120151708	10.5	4.51955482720978	0.0159713081505648
Lcl-046	nsr- nis-	Lactococcus	lactis	cremoris	5	LA	1.91	0.36	7.608	16.324	8.72	4.04416666666667	10.3888333333333	5.8005	1.14214287211845			0	0	0	0	0	0	0	0	0	4.45	6.07	A	15.1883333333333	6.13961558005515	10.6	6.10253935757176	0.84434015355468806
Lcl-046	nsr- nis-	Lactococcus	lactis	cremoris	5	LA	1.91	0.36	7.608	16.324	8.72	4.04416666666667	10.3888333333333	5.8005	1.14214287211845			0	0	0	0	0	0	0	0	0	4.45	6.07	A	15.1883333333333	4.47121384150315	10.6	4.51222746719585	0.0121369328688208
Lcl-046	nsr- nis-	Lactococcus	lactis	cremoris	5	LA	1.91	0.36	7.608	16.324	8.72	4.04416666666667	10.3888333333333	5.8005	1.14214287211845			0	0	0	0	0	0	0	0	0	4.45	6.07	A	15.2883333333333	6.14088511255879	10.7	6.1038088900754	0.845004494332551
Lcl-046	nsr- nis-	Lactococcus	lactis	cremoris	5	LA	1.91	0.36	7.608	16.324	8.72	4.04416666666667	10.3888333333333	5.8005	1.14214287211845			0	0	0	0	0	0	0	0	0	4.45	6.07	A	15.2883333333333	4.47121384150315	10.7	4.51222746719585	0.0121369328688208
Lcl-046	nsr- nis-	Lactococcus	lactis	cremoris	5	LA	1.91	0.36	7.608	16.324	8.72	4.04416666666667	10.3888333333333	5.8005	1.14214287211845			0	0	0	0	0	0	0	0	0	4.45	6.07	A	15.3883333333333	6.13424272830815	10.8	6.09716650582476	0.841528563856352
Lcl-046	nsr- nis-	Lactococcus	lactis	cremoris	5	LA	1.91	0.36	7.608	16.324	8.72	4.04416666666667	10.3888333333333	5.8005	1.14214287211845			0	0	0	0	0	0	0	0	0	4.45	6.07	A	15.3883333333333	4.47121384150315	10.8	4.51222746719585	0.0121369328688208
Lcl-046	nsr- nis-	Lactococcus	lactis	cremoris	5	LA	1.91	0.36	7.608	16.324	8.72	4.04416666666667	10.3888333333333	5.8005	1.14214287211845			0	0	0	0	0	0	0	0	0	4.45	6.07	A	15.4883333333333	6.13934614738958	10.9	6.10226992490619	0.844199160625312
Lcl-046	nsr- nis-	Lactococcus	lactis	cremoris	5	LA	1.91	0.36	7.608	16.324	8.72	4.04416666666667	10.3888333333333	5.8005	1.14214287211845			0	0	0	0	0	0	0	0	0	4.45	6.07	A	15.4883333333333	4.47121384150315	10.9	4.51222746719585	0.0121369328688208
Lcl-046	nsr- nis-	Lactococcus	lactis	cremoris	5	LA	1.91	0.36	7.608	16.324	8.72	4.04416666666667	10.3888333333333	5.8005	1.14214287211845			0	0	0	0	0	0	0	0	0	4.45	6.07	A	15.5883333333333	6.13934614738958	11	6.10226992490619	0.844199160625312
Lcl-046	nsr- nis-	Lactococcus	lactis	cremoris	5	LA	1.91	0.36	7.608	16.324	8.72	4.04416666666667	10.3888333333333	5.8005	1.14214287211845			0	0	0	0	0	0	0	0	0	4.45	6.07	A	15.5883333333333	4.4761925326664596	11	4.51720615835916	0.0147422600665751
Lcl-046	nsr- nis-	Lactococcus	lactis	cremoris	5	LA	1.91	0.36	7.608	16.324	8.72	4.04416666666667	10.3888333333333	5.8005	1.14214287211845			0	0	0	0	0	0	0	0	0	4.45	6.07	A	15.6886666666667	6.13934614738958	11.1003333333333	6.10226992490619	0.844199160625312
Lcl-046	nsr- nis-	Lactococcus	lactis	cremoris	5	LA	1.91	0.36	7.608	16.324	8.72	4.04416666666667	10.3888333333333	5.8005	1.14214287211845			0	0	0	0	0	0	0	0	0	4.45	6.07	A	15.6886666666667	4.4761925326664596	11.1003333333333	4.51720615835916	0.0147422600665751
Lcl-046	nsr- nis-	Lactococcus	lactis	cremoris	5	LA	1.91	0.36	7.608	16.324	8.72	4.04416666666667	10.3888333333333	5.8005	1.14214287211845			0	0	0	0	0	0	0	0	0	4.45	6.07	A	15.7886666666667	6.13151486809477	11.2003333333333	6.09443864561138	0.840101086599283
Lcl-046	nsr- nis-	Lactococcus	lactis	cremoris	5	LA	1.91	0.36	7.608	16.324	8.72	4.04416666666667	10.3888333333333	5.8005	1.14214287211845			0	0	0	0	0	0	0	0	0	4.45	6.07	A	15.7886666666667	4.46388648148921	11.2003333333333	4.50490010718192	0.00830255758707684
Lcl-046	nsr- nis-	Lactococcus	lactis	cremoris	5	LA	1.91	0.36	7.608	16.324	8.72	4.04416666666667	10.3888333333333	5.8005	1.14214287211845			0	0	0	0	0	0	0	0	0	4.45	6.07	A	15.8883333333333	6.12368358879995	11.3	6.08660736631656	0.836003012573254
Lcl-046	nsr- nis-	Lactococcus	lactis	cremoris	5	LA	1.91	0.36	7.608	16.324	8.72	4.04416666666667	10.3888333333333	5.8005	1.14214287211845			0	0	0	0	0	0	0	0	0	4.45	6.07	A	15.8883333333333	4.4589077903259	11.3	4.4999214160186	0.00569723038932256
Lcl-046	nsr- nis-	Lactococcus	lactis	cremoris	5	LA	1.91	0.36	7.608	16.324	8.72	4.04416666666667	10.3888333333333	5.8005	1.14214287211845			0	0	0	0	0	0	0	0	0	4.45	6.07	A	15.9883333333333	6.11832606226908	11.4	6.08124983978569	0.833199442493142
Lcl-046	nsr- nis-	Lactococcus	lactis	cremoris	5	LA	1.91	0.36	7.608	16.324	8.72	4.04416666666667	10.3888333333333	5.8005	1.14214287211845			0	0	0	0	0	0	0	0	0	4.45	6.07	A	15.9883333333333	4.4589077903259	11.4	4.4999214160186	0.00569723038932256
Lcl-046	nsr- nis-	Lactococcus	lactis	cremoris	5	LA	1.91	0.36	7.608	16.324	8.72	4.04416666666667	10.3888333333333	5.8005	1.14214287211845			0	0	0	0	0	0	0	0	0	4.45	6.07	A	16.0883333333333	6.11150001422017	11.5	6.07442379173678	0.829627401558758
Lcl-046	nsr- nis-	Lactococcus	lactis	cremoris	5	LA	1.91	0.36	7.608	16.324	8.72	4.04416666666667	10.3888333333333	5.8005	1.14214287211845			0	0	0	0	0	0	0	0	0	4.45	6.07	A	16.0883333333333	4.4589077903259	11.5	4.4999214160186	0.00569723038932256
Lcl-046	nsr- nis-	Lactococcus	lactis	cremoris	5	LA	1.91	0.36	7.608	16.324	8.72	4.04416666666667	10.3888333333333	5.8005	1.14214287211845			0	0	0	0	0	0	0	0	0	4.45	6.07	A	16.1883333333333	6.11023048171652	11.6	6.07315425923313	0.828963060780895
Lcl-046	nsr- nis-	Lactococcus	lactis	cremoris	5	LA	1.91	0.36	7.608	16.324	8.72	4.04416666666667	10.3888333333333	5.8005	1.14214287211845			0	0	0	0	0	0	0	0	0	4.45	6.07	A	16.1883333333333	4.4589077903259	11.6	4.4999214160186	0.00569723038932256
Lcl-046	nsr- nis-	Lactococcus	lactis	cremoris	5	LA	1.91	0.36	7.608	16.324	8.72	4.04416666666667	10.3888333333333	5.8005	1.14214287211845			0	0	0	0	0	0	0	0	0	4.45	6.07	A	16.2883333333333	6.11780765356189	11.7	6.0807314310785	0.832928161495771
Lcl-046	nsr- nis-	Lactococcus	lactis	cremoris	5	LA	1.91	0.36	7.608	16.324	8.72	4.04416666666667	10.3888333333333	5.8005	1.14214287211845			0	0	0	0	0	0	0	0	0	4.45	6.07	A	16.2883333333333	4.46306195031039	11.7	4.5040755760031	0.00787108404611829
Lcl-046	nsr- nis-	Lactococcus	lactis	cremoris	5	LA	1.91	0.36	7.608	16.324	8.72	4.04416666666667	10.3888333333333	5.8005	1.14214287211845			0	0	0	0	0	0	0	0	0	4.45	6.07	A	16.3883333333333	6.11881288480779	11.8	6.08173666232441	0.833454194587417
Lcl-046	nsr- nis-	Lactococcus	lactis	cremoris	5	LA	1.91	0.36	7.608	16.324	8.72	4.04416666666667	10.3888333333333	5.8005	1.14214287211845			0	0	0	0	0	0	0	0	0	4.45	6.07	A	16.3883333333333	4.46721611029489	11.8	4.50822973598759	0.010044937702914
Lcl-046	nsr- nis-	Lactococcus	lactis	cremoris	5	LA	1.91	0.36	7.608	16.324	8.72	4.04416666666667	10.3888333333333	5.8005	1.14214287211845			0	0	0	0	0	0	0	0	0	4.45	6.07	A	16.4883333333333	6.11224094420833	11.9	6.07516472172494	0.830015126964186
Lcl-046	nsr- nis-	Lactococcus	lactis	cremoris	5	LA	1.91	0.36	7.608	16.324	8.72	4.04416666666667	10.3888333333333	5.8005	1.14214287211845			0	0	0	0	0	0	0	0	0	4.45	6.07	A	16.4883333333333	4.46721611029489	11.9	4.50822973598759	0.010044937702914
Lcl-046	nsr- nis-	Lactococcus	lactis	cremoris	5	LA	1.91	0.36	7.608	16.324	8.72	4.04416666666667	10.3888333333333	5.8005	1.14214287211845			0	0	0	0	0	0	0	0	0	4.45	6.07	A	16.5888333333333	6.11123571296242	12.0005	6.07415949047904	0.82948909387254
Lcl-046	nsr- nis-	Lactococcus	lactis	cremoris	5	LA	1.91	0.36	7.608	16.324	8.72	4.04416666666667	10.3888333333333	5.8005	1.14214287211845			0	0	0	0	0	0	0	0	0	4.45	6.07	A	16.5888333333333	4.46223741913157	12.0005	4.50325104482428	0.00743961050515974
Lcl-046	nsr- nis-	Lactococcus	lactis	cremoris	5	LA	1.91	0.36	7.608	16.324	8.72	4.04416666666667	10.3888333333333	5.8005	1.14214287211845			0	0	0	0	0	0	0	0	0	4.45	6.07	A	16.6883333333333	6.10567919741716	12.1	6.06860297493377	0.82658139371602
Lcl-046	nsr- nis-	Lactococcus	lactis	cremoris	5	LA	1.91	0.36	7.608	16.324	8.72	4.04416666666667	10.3888333333333	5.8005	1.14214287211845			0	0	0	0	0	0	0	0	0	4.45	6.07	A	16.6883333333333	4.45725872796826	12.1	4.49827235366097	0.00483428330740547
Lcl-046	nsr- nis-	Lactococcus	lactis	cremoris	5	LA	1.91	0.36	7.608	16.324	8.72	4.04416666666667	10.3888333333333	5.8005	1.14214287211845			0	0	0	0	0	0	0	0	0	4.45	6.07	A	16.7883333333333	6.09810202557179	12.2	6.0610258030884	0.822616293001143
Lcl-046	nsr- nis-	Lactococcus	lactis	cremoris	5	LA	1.91	0.36	7.608	16.324	8.72	4.04416666666667	10.3888333333333	5.8005	1.14214287211845			0	0	0	0	0	0	0	0	0	4.45	6.07	A	16.7883333333333	4.46136054308927	12.2	4.50237416878197	0.00698074512726307
Lcl-046	nsr- nis-	Lactococcus	lactis	cremoris	5	LA	1.91	0.36	7.608	16.324	8.72	4.04416666666667	10.3888333333333	5.8005	1.14214287211845			0	0	0	0	0	0	0	0	0	4.45	6.07	A	16.8883333333333	6.09810202557179	12.3	6.0610258030884	0.822616293001143
Lcl-046	nsr- nis-	Lactococcus	lactis	cremoris	5	LA	1.91	0.36	7.608	16.324	8.72	4.04416666666667	10.3888333333333	5.8005	1.14214287211845			0	0	0	0	0	0	0	0	0	4.45	6.07	A	16.8883333333333	4.46546235821027	12.3	4.50647598390297	0.00912720694712068
Lcl-046	nsr- nis-	Lactococcus	lactis	cremoris	5	LA	1.91	0.36	7.608	16.324	8.72	4.04416666666667	10.3888333333333	5.8005	1.14214287211845			0	0	0	0	0	0	0	0	0	4.45	6.07	A	16.9883333333333	6.09810202557179	12.4	6.0610258030884	0.822616293001143
Lcl-046	nsr- nis-	Lactococcus	lactis	cremoris	5	LA	1.91	0.36	7.608	16.324	8.72	4.04416666666667	10.3888333333333	5.8005	1.14214287211845			0	0	0	0	0	0	0	0	0	4.45	6.07	A	16.9883333333333	4.45627655302325	12.4	4.49729017871595	0.0043203154766538
Lcl-046	nsr- nis-	Lactococcus	lactis	cremoris	5	LA	1.91	0.36	7.608	16.324	8.72	4.04416666666667	10.3888333333333	5.8005	1.14214287211845			0	0	0	0	0	0	0	0	0	4.45	6.07	A	17.0888333333333	6.09910725681769	12.5005	6.06203103433431	0.823142326092789
Lcl-046	nsr- nis-	Lactococcus	lactis	cremoris	5	LA	1.91	0.36	7.608	16.324	8.72	4.04416666666667	10.3888333333333	5.8005	1.14214287211845			0	0	0	0	0	0	0	0	0	4.45	6.07	A	17.0888333333333	4.46453252812875	12.5005	4.50554615382145	0.00864063095330714
Lcl-046	nsr- nis-	Lactococcus	lactis	cremoris	5	LA	1.91	0.36	7.608	16.324	8.72	4.04416666666667	10.3888333333333	5.8005	1.14214287211845			0	0	0	0	0	0	0	0	0	4.45	6.07	A	17.1883333333333	6.10011401789832	12.6	6.06303779541493	0.823669159740219
Lcl-046	nsr- nis-	Lactococcus	lactis	cremoris	5	LA	1.91	0.36	7.608	16.324	8.72	4.04416666666667	10.3888333333333	5.8005	1.14214287211845			0	0	0	0	0	0	0	0	0	4.45	6.07	A	17.1883333333333	4.47278850323425	12.6	4.51380212892695	0.0129609464299609
Lcl-046	nsr- nis-	Lactococcus	lactis	cremoris	5	LA	1.91	0.36	7.608	16.324	8.72	4.04416666666667	10.3888333333333	5.8005	1.14214287211845			0	0	0	0	0	0	0	0	0	4.45	6.07	A	17.2886666666667	6.10111924914422	12.7003333333333	6.06404302666084	0.824195192831865
Lcl-046	nsr- nis-	Lactococcus	lactis	cremoris	5	LA	1.91	0.36	7.608	16.324	8.72	4.04416666666667	10.3888333333333	5.8005	1.14214287211845			0	0	0	0	0	0	0	0	0	4.45	6.07	A	17.2886666666667	4.46868668811324	12.7003333333333	4.50970031380595	0.0108144846101033
Lcl-046	nsr- nis-	Lactococcus	lactis	cremoris	5	LA	1.91	0.36	7.608	16.324	8.72	4.04416666666667	10.3888333333333	5.8005	1.14214287211845			0	0	0	0	0	0	0	0	0	4.45	6.07	A	17.3886666666667	6.09336724165624	12.8003333333333	6.05629101917286	0.820138601393847
Lcl-046	nsr- nis-	Lactococcus	lactis	cremoris	5	LA	1.91	0.36	7.608	16.324	8.72	4.04416666666667	10.3888333333333	5.8005	1.14214287211845			0	0	0	0	0	0	0	0	0	4.45	6.07	A	17.3886666666667	4.46043071300774	12.8003333333333	4.50144433870045	0.00649416913344953
Lcl-046	nsr- nis-	Lactococcus	lactis	cremoris	5	LA	1.91	0.36	7.608	16.324	8.72	4.04416666666667	10.3888333333333	5.8005	1.14214287211845			0	0	0	0	0	0	0	0	0	4.45	6.07	A	17.4883333333333	6.08561523416826	12.9	6.04853901168488	0.816082009955828
Lcl-046	nsr- nis-	Lactococcus	lactis	cremoris	5	LA	1.91	0.36	7.608	16.324	8.72	4.04416666666667	10.3888333333333	5.8005	1.14214287211845			0	0	0	0	0	0	0	0	0	4.45	6.07	A	17.4883333333333	4.47289380213695	12.9	4.51390742782965	0.0130160488828159
Lcl-046	nsr- nis-	Lactococcus	lactis	cremoris	5	LA	1.91	0.36	7.608	16.324	8.72	4.04416666666667	10.3888333333333	5.8005	1.14214287211845			0	0	0	0	0	0	0	0	0	4.45	6.07	A	17.5883333333333	6.08662199524889	13	6.0495457727655	0.816608843603258
Lcl-046	nsr- nis-	Lactococcus	lactis	cremoris	5	LA	1.91	0.36	7.608	16.324	8.72	4.04416666666667	10.3888333333333	5.8005	1.14214287211845			0	0	0	0	0	0	0	0	0	4.45	6.07	A	17.5883333333333	4.46463782703145	13	4.50565145272415	0.00869573340616213
Lcl-046	nsr- nis-	Lactococcus	lactis	cremoris	5	LA	1.91	0.36	7.608	16.324	8.72	4.04416666666667	10.3888333333333	5.8005	1.14214287211845			0	0	0	0	0	0	0	0	0	4.45	6.07	A	17.6886666666667	6.07885865625146	13.1003333333333	6.04178243376807	0.812546322436163
Lcl-046	nsr- nis-	Lactococcus	lactis	cremoris	5	LA	1.91	0.36	7.608	16.324	8.72	4.04416666666667	10.3888333333333	5.8005	1.14214287211845			0	0	0	0	0	0	0	0	0	4.45	6.07	A	17.6886666666667	4.45217473790225	13.1003333333333	4.49318836359495	0.0021738536567962
Lcl-046	nsr- nis-	Lactococcus	lactis	cremoris	5	LA	1.91	0.36	7.608	16.324	8.72	4.04416666666667	10.3888333333333	5.8005	1.14214287211845			0	0	0	0	0	0	0	0	0	4.45	6.07	A	17.7886666666667	6.07210207833466	13.2003333333333	6.03502585585127	0.809010634916498
Lcl-046	nsr- nis-	Lactococcus	lactis	cremoris	5	LA	1.91	0.36	7.608	16.324	8.72	4.04416666666667	10.3888333333333	5.8005	1.14214287211845			0	0	0	0	0	0	0	0	0	4.45	6.07	A	17.7886666666667	4.44802057791775	13.2003333333333	4.48903420361046	0
Lcl-046	nsr- nis-	Lactococcus	lactis	cremoris	5	LA	1.91	0.36	7.608	16.324	8.72	4.04416666666667	10.3888333333333	5.8005	1.14214287211845			0	0	0	0	0	0	0	0	0	4.45	6.07	A	17.8883333333333	6.0747894852624	13.3	6.03771326277901	0.810416943147037
Lcl-046	nsr- nis-	Lactococcus	lactis	cremoris	5	LA	1.91	0.36	7.608	16.324	8.72	4.04416666666667	10.3888333333333	5.8005	1.14214287211845			0	0	0	0	0	0	0	0	0	4.45	6.07	A	17.8883333333333	4.4490327931882	13.3	4.4900464188809	5.29687800985418e-4
Lcl-033	nsr- nis-	Lactococcus	lactis	cremoris	50	LA	0.66	0.27	7.566	14.337	6.77	3.24416666666667	7.88833333333333	5.4	1.09933655139252			0	0	0	0	0	0	0	0	0	5.75	6.19	A	0.188333333333333	6.42979932921097	-2.3	6.36902600937257	0.952902848099169
Lcl-033	nsr- nis-	Lactococcus	lactis	cremoris	50	LA	0.66	0.27	7.566	14.337	6.77	3.24416666666667	7.88833333333333	5.4	1.09933655139252			0	0	0	0	0	0	0	0	0	5.75	6.19	A	0.188333333333333	6.3555031385286	-2.3	6.35022632651382	0.924317202486493
Lcl-033	nsr- nis-	Lactococcus	lactis	cremoris	50	LA	0.66	0.27	7.566	14.337	6.77	3.24416666666667	7.88833333333333	5.4	1.09933655139252			0	0	0	0	0	0	0	0	0	5.75	6.19	A	0.288333333333333	6.43303232822817	-2.2	6.37225900838977	0.957818748269726
Lcl-033	nsr- nis-	Lactococcus	lactis	cremoris	50	LA	0.66	0.27	7.566	14.337	6.77	3.24416666666667	7.88833333333333	5.4	1.09933655139252			0	0	0	0	0	0	0	0	0	5.75	6.19	A	0.288333333333333	6.36437753844339	-2.2	6.35910072642861	0.937811071127543
Lcl-033	nsr- nis-	Lactococcus	lactis	cremoris	50	LA	0.66	0.27	7.566	14.337	6.77	3.24416666666667	7.88833333333333	5.4	1.09933655139252			0	0	0	0	0	0	0	0	0	5.75	6.19	A	0.388333333333333	6.43842178803095	-2.1	6.37764846819255	0.966013630551707
Lcl-033	nsr- nis-	Lactococcus	lactis	cremoris	50	LA	0.66	0.27	7.566	14.337	6.77	3.24416666666667	7.88833333333333	5.4	1.09933655139252			0	0	0	0	0	0	0	0	0	5.75	6.19	A	0.388333333333333	6.37082821262673	-2.1	6.36555140061195	0.94761957095986
Lcl-033	nsr- nis-	Lactococcus	lactis	cremoris	50	LA	0.66	0.27	7.566	14.337	6.77	3.24416666666667	7.88833333333333	5.4	1.09933655139252			0	0	0	0	0	0	0	0	0	5.75	6.19	A	0.488833333333333	6.44623361980207	-1.9995	6.38546029996368	0.977891823193208
Lcl-033	nsr- nis-	Lactococcus	lactis	cremoris	50	LA	0.66	0.27	7.566	14.337	6.77	3.24416666666667	7.88833333333333	5.4	1.09933655139252			0	0	0	0	0	0	0	0	0	5.75	6.19	A	0.488833333333333	6.37969144041262	-1.9995	6.37441462839784	0.961096451946393
Lcl-033	nsr- nis-	Lactococcus	lactis	cremoris	50	LA	0.66	0.27	7.566	14.337	6.77	3.24416666666667	7.88833333333333	5.4	1.09933655139252			0	0	0	0	0	0	0	0	0	5.75	6.19	A	0.588833333333333	6.45377978945777	-1.8995	6.39300646961937	0.98936606630313
Lcl-033	nsr- nis-	Lactococcus	lactis	cremoris	50	LA	0.66	0.27	7.566	14.337	6.77	3.24416666666667	7.88833333333333	5.4	1.09933655139252			0	0	0	0	0	0	0	0	0	5.75	6.19	A	0.588833333333333	6.37726771468116	-1.8995	6.37199090266639	0.95741108313766
Lcl-033	nsr- nis-	Lactococcus	lactis	cremoris	50	LA	0.66	0.27	7.566	14.337	6.77	3.24416666666667	7.88833333333333	5.4	1.09933655139252			0	0	0	0	0	0	0	0	0	5.75	6.19	A	0.688666666666667	6.45377978945777	-1.79966666666667	6.39300646961937	0.98936606630313
Lcl-033	nsr- nis-	Lactococcus	lactis	cremoris	50	LA	0.66	0.27	7.566	14.337	6.77	3.24416666666667	7.88833333333333	5.4	1.09933655139252			0	0	0	0	0	0	0	0	0	5.75	6.19	A	0.688666666666667	6.3837183888645	-1.79966666666667	6.37844157684972	0.967219582969978
Lcl-033	nsr- nis-	Lactococcus	lactis	cremoris	50	LA	0.66	0.27	7.566	14.337	6.77	3.24416666666667	7.88833333333333	5.4	1.09933655139252			0	0	0	0	0	0	0	0	0	5.75	6.19	A	0.788333333333333	6.45377978945777	-1.7	6.39300646961937	0.98936606630313
Lcl-033	nsr- nis-	Lactococcus	lactis	cremoris	50	LA	0.66	0.27	7.566	14.337	6.77	3.24416666666667	7.88833333333333	5.4	1.09933655139252			0	0	0	0	0	0	0	0	0	5.75	6.19	A	0.788333333333333	6.38129466313304	-1.7	6.37601785111827	0.963534214161245
Lcl-033	nsr- nis-	Lactococcus	lactis	cremoris	50	LA	0.66	0.27	7.566	14.337	6.77	3.24416666666667	7.88833333333333	5.4	1.09933655139252			0	0	0	0	0	0	0	0	0	5.75	6.19	A	0.888333333333333	6.45377978945777	-1.6	6.39300646961937	0.98936606630313
Lcl-033	nsr- nis-	Lactococcus	lactis	cremoris	50	LA	0.66	0.27	7.566	14.337	6.77	3.24416666666667	7.88833333333333	5.4	1.09933655139252			0	0	0	0	0	0	0	0	0	5.75	6.19	A	0.888333333333333	6.39018733663823	-1.6	6.38491052462345	0.977055868503946
Lcl-033	nsr- nis-	Lactococcus	lactis	cremoris	50	LA	0.66	0.27	7.566	14.337	6.77	3.24416666666667	7.88833333333333	5.4	1.09933655139252			0	0	0	0	0	0	0	0	0	5.75	6.19	A	0.988333333333333	6.44623754012333	-1.5	6.38546422028493	0.977897784193444
Lcl-033	nsr- nis-	Lactococcus	lactis	cremoris	50	LA	0.66	0.27	7.566	14.337	6.77	3.24416666666667	7.88833333333333	5.4	1.09933655139252			0	0	0	0	0	0	0	0	0	5.75	6.19	A	0.988333333333333	6.39908001014341	-1.5	6.39380319812863	0.990577522846648
Lcl-033	nsr- nis-	Lactococcus	lactis	cremoris	50	LA	0.66	0.27	7.566	14.337	6.77	3.24416666666667	7.88833333333333	5.4	1.09933655139252			0	0	0	0	0	0	0	0	0	5.75	6.19	A	1.08833333333333	6.44408250479691	-1.4	6.38330918495851	0.974620969547865
Lcl-033	nsr- nis-	Lactococcus	lactis	cremoris	50	LA	0.66	0.27	7.566	14.337	6.77	3.24416666666667	7.88833333333333	5.4	1.09933655139252			0	0	0	0	0	0	0	0	0	5.75	6.19	A	1.08833333333333	6.39908001014341	-1.4	6.39380319812863	0.990577522846648
Lcl-033	nsr- nis-	Lactococcus	lactis	cremoris	50	LA	0.66	0.27	7.566	14.337	6.77	3.24416666666667	7.88833333333333	5.4	1.09933655139252			0	0	0	0	0	0	0	0	0	5.75	6.19	A	1.18866666666667	6.45160779647618	-1.29966666666667	6.39083447663779	0.986063466886362
Lcl-033	nsr- nis-	Lactococcus	lactis	cremoris	50	LA	0.66	0.27	7.566	14.337	6.77	3.24416666666667	7.88833333333333	5.4	1.09933655139252			0	0	0	0	0	0	0	0	0	5.75	6.19	A	1.18866666666667	6.40527681201478	-1.29966666666667	6.4	1
Lcl-033	nsr- nis-	Lactococcus	lactis	cremoris	50	LA	0.66	0.27	7.566	14.337	6.77	3.24416666666667	7.88833333333333	5.4	1.09933655139252			0	0	0	0	0	0	0	0	0	5.75	6.19	A	1.28833333333333	6.44945276114977	-1.2	6.38867944131137	0.982786652240783
Lcl-033	nsr- nis-	Lactococcus	lactis	cremoris	50	LA	0.66	0.27	7.566	14.337	6.77	3.24416666666667	7.88833333333333	5.4	1.09933655139252			0	0	0	0	0	0	0	0	0	5.75	6.19	A	1.28833333333333	6.4028553130552	-1.2	6.39757850104042	0.996318017084116
Lcl-033	nsr- nis-	Lactococcus	lactis	cremoris	50	LA	0.66	0.27	7.566	14.337	6.77	3.24416666666667	7.88833333333333	5.4	1.09933655139252			0	0	0	0	0	0	0	0	0	5.75	6.19	A	1.38833333333333	6.44729772582335	-1.1	6.38652440598495	0.979509837595203
Lcl-033	nsr- nis-	Lactococcus	lactis	cremoris	50	LA	0.66	0.27	7.566	14.337	6.77	3.24416666666667	7.88833333333333	5.4	1.09933655139252			0	0	0	0	0	0	0	0	0	5.75	6.19	A	1.38833333333333	6.38751196536668	-1.1	6.3822351533519	0.972987862909097
Lcl-033	nsr- nis-	Lactococcus	lactis	cremoris	50	LA	0.66	0.27	7.566	14.337	6.77	3.24416666666667	7.88833333333333	5.4	1.09933655139252			0	0	0	0	0	0	0	0	0	5.75	6.19	A	1.48833333333333	6.45053201896438	-1	6.38975869912598	0.984427705531146
Lcl-033	nsr- nis-	Lactococcus	lactis	cremoris	50	LA	0.66	0.27	7.566	14.337	6.77	3.24416666666667	7.88833333333333	5.4	1.09933655139252			0	0	0	0	0	0	0	0	0	5.75	6.19	A	1.48833333333333	6.3697560640756	-1	6.36447925206083	0.945989327579862
Lcl-033	nsr- nis-	Lactococcus	lactis	cremoris	50	LA	0.66	0.27	7.566	14.337	6.77	3.24416666666667	7.88833333333333	5.4	1.09933655139252			0	0	0	0	0	0	0	0	0	5.75	6.19	A	1.58866666666667	6.44541046847979	-0.899666666666667	6.38463714864139	0.976640189739531
Lcl-033	nsr- nis-	Lactococcus	lactis	cremoris	50	LA	0.66	0.27	7.566	14.337	6.77	3.24416666666667	7.88833333333333	5.4	1.09933655139252			0	0	0	0	0	0	0	0	0	5.75	6.19	A	1.58866666666667	6.36733456511603	-0.899666666666667	6.36205775310125	0.942307344663978
Lcl-033	nsr- nis-	Lactococcus	lactis	cremoris	50	LA	0.66	0.27	7.566	14.337	6.77	3.24416666666667	7.88833333333333	5.4	1.09933655139252			0	0	0	0	0	0	0	0	0	5.75	6.19	A	1.68883333333333	6.44326405341761	-0.7995	6.38249073357921	0.973376482539458
Lcl-033	nsr- nis-	Lactococcus	lactis	cremoris	50	LA	0.66	0.27	7.566	14.337	6.77	3.24416666666667	7.88833333333333	5.4	1.09933655139252			0	0	0	0	0	0	0	0	0	5.75	6.19	A	1.68883333333333	6.36113776324466	-0.7995	6.35586095122988	0.932884867510628
Lcl-033	nsr- nis-	Lactococcus	lactis	cremoris	50	LA	0.66	0.27	7.566	14.337	6.77	3.24416666666667	7.88833333333333	5.4	1.09933655139252			0	0	0	0	0	0	0	0	0	5.75	6.19	A	1.78833333333333	6.43598601500393	-0.7	6.37521269516553	0.962309943363664
Lcl-033	nsr- nis-	Lactococcus	lactis	cremoris	50	LA	0.66	0.27	7.566	14.337	6.77	3.24416666666667	7.88833333333333	5.4	1.09933655139252			0	0	0	0	0	0	0	0	0	5.75	6.19	A	1.78833333333333	6.36355926220424	-0.7	6.35828245018946	0.936566850426511
Lcl-033	nsr- nis-	Lactococcus	lactis	cremoris	50	LA	0.66	0.27	7.566	14.337	6.77	3.24416666666667	7.88833333333333	5.4	1.09933655139252			0	0	0	0	0	0	0	0	0	5.75	6.19	A	1.88866666666667	6.43841032371008	-0.599666666666667	6.37763700387168	0.965996198607986
Lcl-033	nsr- nis-	Lactococcus	lactis	cremoris	50	LA	0.66	0.27	7.566	14.337	6.77	3.24416666666667	7.88833333333333	5.4	1.09933655139252			0	0	0	0	0	0	0	0	0	5.75	6.19	A	1.88866666666667	6.37000993638757	-0.599666666666667	6.3647331243728	0.946375350258828
Lcl-033	nsr- nis-	Lactococcus	lactis	cremoris	50	LA	0.66	0.27	7.566	14.337	6.77	3.24416666666667	7.88833333333333	5.4	1.09933655139252			0	0	0	0	0	0	0	0	0	5.75	6.19	A	1.98833333333333	6.44352511352783	-0.5	6.38275179368944	0.973773434543944
Lcl-033	nsr- nis-	Lactococcus	lactis	cremoris	50	LA	0.66	0.27	7.566	14.337	6.77	3.24416666666667	7.88833333333333	5.4	1.09933655139252			0	0	0	0	0	0	0	0	0	5.75	6.19	A	1.98833333333333	6.37887316417347	-0.5	6.37359635215869	0.959852231245361
Lcl-033	nsr- nis-	Lactococcus	lactis	cremoris	50	LA	0.66	0.27	7.566	14.337	6.77	3.24416666666667	7.88833333333333	5.4	1.09933655139252			0	0	0	0	0	0	0	0	0	5.75	6.19	A	2.08866666666667	6.45618057595594	-0.399666666666667	6.39540725611754	0.993016555119566
Lcl-033	nsr- nis-	Lactococcus	lactis	cremoris	50	LA	0.66	0.27	7.566	14.337	6.77	3.24416666666667	7.88833333333333	5.4	1.09933655139252			0	0	0	0	0	0	0	0	0	5.75	6.19	A	2.08866666666667	6.38398780041453	-0.399666666666667	6.37871098839975	0.967629233662016
Lcl-033	nsr- nis-	Lactococcus	lactis	cremoris	50	LA	0.66	0.27	7.566	14.337	6.77	3.24416666666667	7.88833333333333	5.4	1.09933655139252			0	0	0	0	0	0	0	0	0	5.75	6.19	A	2.18833333333333	6.45107097271857	-0.3	6.39029765288017	0.985247205579883
Lcl-033	nsr- nis-	Lactococcus	lactis	cremoris	50	LA	0.66	0.27	7.566	14.337	6.77	3.24416666666667	7.88833333333333	5.4	1.09933655139252			0	0	0	0	0	0	0	0	0	5.75	6.19	A	2.18833333333333	6.37512457262864	-0.3	6.36984776061386	0.954152352675485
Lcl-033	nsr- nis-	Lactococcus	lactis	cremoris	50	LA	0.66	0.27	7.566	14.337	6.77	3.24416666666667	7.88833333333333	5.4	1.09933655139252			0	0	0	0	0	0	0	0	0	5.75	6.19	A	2.28833333333333	6.4607733198384	-0.2	6.4	1
Lcl-033	nsr- nis-	Lactococcus	lactis	cremoris	50	LA	0.66	0.27	7.566	14.337	6.77	3.24416666666667	7.88833333333333	5.4	1.09933655139252			0	0	0	0	0	0	0	0	0	5.75	6.19	A	2.28833333333333	6.36626134484275	-0.2	6.36098453282797	0.940675471688952
Lcl-033	nsr- nis-	Lactococcus	lactis	cremoris	50	LA	0.66	0.27	7.566	14.337	6.77	3.24416666666667	7.88833333333333	5.4	1.09933655139252			0	0	0	0	0	0	0	0	0	5.75	6.19	A	2.38866666666667	6.4586184622336	-0.0996666666666672	6.39784514239521	0.996723455587036
Lcl-033	nsr- nis-	Lactococcus	lactis	cremoris	50	LA	0.66	0.27	7.566	14.337	6.77	3.24416666666667	7.88833333333333	5.4	1.09933655139252			0	0	0	0	0	0	0	0	0	5.75	6.19	A	2.38866666666667	6.35739811705686	-0.0996666666666672	6.35212130504208	0.927198590702419
Lcl-033	nsr- nis-	Lactococcus	lactis	cremoris	50	LA	0.66	0.27	7.566	14.337	6.77	3.24416666666667	7.88833333333333	5.4	1.09933655139252			0	0	0	0	0	0	0	0	0	5.75	6.19	A	2.48833333333333	6.45565853002064	0	6.39488521018224	0.992222764064041
Lcl-033	nsr- nis-	Lactococcus	lactis	cremoris	50	LA	0.66	0.27	7.566	14.337	6.77	3.24416666666667	7.88833333333333	5.4	1.09933655139252			0	0	0	0	0	0	0	0	0	5.75	6.19	A	2.48833333333333	6.34853488927096	0	6.34325807725619	0.913721709715886
Lcl-033	nsr- nis-	Lactococcus	lactis	cremoris	50	LA	0.66	0.27	7.566	14.337	6.77	3.24416666666667	7.88833333333333	5.4	1.09933655139252			0	0	0	0	0	0	0	0	0	5.75	6.19	A	2.58866666666667	6.45054892678327	0.100333333333333	6.38977560694488	0.984453414524358
Lcl-033	nsr- nis-	Lactococcus	lactis	cremoris	50	LA	0.66	0.27	7.566	14.337	6.77	3.24416666666667	7.88833333333333	5.4	1.09933655139252			0	0	0	0	0	0	0	0	0	5.75	6.19	A	2.58866666666667	6.33697852420358	0.100333333333333	6.33170171218881	0.896149809228581
Lcl-033	nsr- nis-	Lactococcus	lactis	cremoris	50	LA	0.66	0.27	7.566	14.337	6.77	3.24416666666667	7.88833333333333	5.4	1.09933655139252			0	0	0	0	0	0	0	0	0	5.75	6.19	A	2.68833333333333	6.45054892678327	0.2	6.38977560694488	0.984453414524358
Lcl-033	nsr- nis-	Lactococcus	lactis	cremoris	50	LA	0.66	0.27	7.566	14.337	6.77	3.24416666666667	7.88833333333333	5.4	1.09933655139252			0	0	0	0	0	0	0	0	0	5.75	6.19	A	2.68833333333333	6.33030152628353	0.2	6.32502471426875	0.885997175392499
Lcl-033	nsr- nis-	Lactococcus	lactis	cremoris	50	LA	0.66	0.27	7.566	14.337	6.77	3.24416666666667	7.88833333333333	5.4	1.09933655139252			0	0	0	0	0	0	0	0	0	5.75	6.19	A	2.78833333333333	6.44839406917848	0.3	6.38762074934008	0.981176870111394
Lcl-033	nsr- nis-	Lactococcus	lactis	cremoris	50	LA	0.66	0.27	7.566	14.337	6.77	3.24416666666667	7.88833333333333	5.4	1.09933655139252			0	0	0	0	0	0	0	0	0	5.75	6.19	A	2.78833333333333	6.33030152628353	0.3	6.32502471426875	0.885997175392499
Lcl-033	nsr- nis-	Lactococcus	lactis	cremoris	50	LA	0.66	0.27	7.566	14.337	6.77	3.24416666666667	7.88833333333333	5.4	1.09933655139252			0	0	0	0	0	0	0	0	0	5.75	6.19	A	2.88833333333333	6.45054892678327	0.4	6.38977560694488	0.984453414524358
Lcl-033	nsr- nis-	Lactococcus	lactis	cremoris	50	LA	0.66	0.27	7.566	14.337	6.77	3.24416666666667	7.88833333333333	5.4	1.09933655139252			0	0	0	0	0	0	0	0	0	5.75	6.19	A	2.88833333333333	6.32602368564479	0.4	6.32074687363001	0.879492553085564
Lcl-033	nsr- nis-	Lactococcus	lactis	cremoris	50	LA	0.66	0.27	7.566	14.337	6.77	3.24416666666667	7.88833333333333	5.4	1.09933655139252			0	0	0	0	0	0	0	0	0	5.75	6.19	A	2.98866666666667	6.44839406917848	0.500333333333333	6.38762074934008	0.981176870111394
Lcl-033	nsr- nis-	Lactococcus	lactis	cremoris	50	LA	0.66	0.27	7.566	14.337	6.77	3.24416666666667	7.88833333333333	5.4	1.09933655139252			0	0	0	0	0	0	0	0	0	5.75	6.19	A	2.98866666666667	6.31934668772473	0.500333333333333	6.31406987570996	0.869339919249481
Lcl-033	nsr- nis-	Lactococcus	lactis	cremoris	50	LA	0.66	0.27	7.566	14.337	6.77	3.24416666666667	7.88833333333333	5.4	1.09933655139252			0	0	0	0	0	0	0	0	0	5.75	6.19	A	3.08866666666667	6.44839406917848	0.600333333333333	6.38762074934008	0.981176870111394
Lcl-033	nsr- nis-	Lactococcus	lactis	cremoris	50	LA	0.66	0.27	7.566	14.337	6.77	3.24416666666667	7.88833333333333	5.4	1.09933655139252			0	0	0	0	0	0	0	0	0	5.75	6.19	A	3.08866666666667	6.31266968980468	0.600333333333333	6.3073928777899	0.859187285413399
Lcl-033	nsr- nis-	Lactococcus	lactis	cremoris	50	LA	0.66	0.27	7.566	14.337	6.77	3.24416666666667	7.88833333333333	5.4	1.09933655139252			0	0	0	0	0	0	0	0	0	5.75	6.19	A	3.18833333333333	6.44623921157369	0.7	6.38546589173529	0.977900325698431
Lcl-033	nsr- nis-	Lactococcus	lactis	cremoris	50	LA	0.66	0.27	7.566	14.337	6.77	3.24416666666667	7.88833333333333	5.4	1.09933655139252			0	0	0	0	0	0	0	0	0	5.75	6.19	A	3.18833333333333	6.315068847086	0.7	6.30979203507122	0.862835296942548
Lcl-033	nsr- nis-	Lactococcus	lactis	cremoris	50	LA	0.66	0.27	7.566	14.337	6.77	3.24416666666667	7.88833333333333	5.4	1.09933655139252			0	0	0	0	0	0	0	0	0	5.75	6.19	A	3.28833333333333	6.44839406917848	0.8	6.38762074934008	0.981176870111394
Lcl-033	nsr- nis-	Lactococcus	lactis	cremoris	50	LA	0.66	0.27	7.566	14.337	6.77	3.24416666666667	7.88833333333333	5.4	1.09933655139252			0	0	0	0	0	0	0	0	0	5.75	6.19	A	3.28833333333333	6.30149437177401	0.8	6.29621755975923	0.842194781697581
Lcl-033	nsr- nis-	Lactococcus	lactis	cremoris	50	LA	0.66	0.27	7.566	14.337	6.77	3.24416666666667	7.88833333333333	5.4	1.09933655139252			0	0	0	0	0	0	0	0	0	5.75	6.19	A	3.38833333333333	6.44623921157369	0.9	6.38546589173529	0.977900325698431
Lcl-033	nsr- nis-	Lactococcus	lactis	cremoris	50	LA	0.66	0.27	7.566	14.337	6.77	3.24416666666667	7.88833333333333	5.4	1.09933655139252			0	0	0	0	0	0	0	0	0	5.75	6.19	A	3.38833333333333	6.30149437177401	0.9	6.29621755975923	0.842194781697581
Lcl-033	nsr- nis-	Lactococcus	lactis	cremoris	50	LA	0.66	0.27	7.566	14.337	6.77	3.24416666666667	7.88833333333333	5.4	1.09933655139252			0	0	0	0	0	0	0	0	0	5.75	6.19	A	3.48833333333333	6.44623921157369	1	6.38546589173529	0.977900325698431
Lcl-033	nsr- nis-	Lactococcus	lactis	cremoris	50	LA	0.66	0.27	7.566	14.337	6.77	3.24416666666667	7.88833333333333	5.4	1.09933655139252			0	0	0	0	0	0	0	0	0	5.75	6.19	A	3.48833333333333	6.29459689438208	1	6.2893200823673	0.831706900288698
Lcl-033	nsr- nis-	Lactococcus	lactis	cremoris	50	LA	0.66	0.27	7.566	14.337	6.77	3.24416666666667	7.88833333333333	5.4	1.09933655139252			0	0	0	0	0	0	0	0	0	5.75	6.19	A	3.58833333333333	6.44623921157369	1.1	6.38546589173529	0.977900325698431
Lcl-033	nsr- nis-	Lactococcus	lactis	cremoris	50	LA	0.66	0.27	7.566	14.337	6.77	3.24416666666667	7.88833333333333	5.4	1.09933655139252			0	0	0	0	0	0	0	0	0	5.75	6.19	A	3.58833333333333	6.28769941699015	1.1	6.28242260497537	0.821219018879815
Lcl-033	nsr- nis-	Lactococcus	lactis	cremoris	50	LA	0.66	0.27	7.566	14.337	6.77	3.24416666666667	7.88833333333333	5.4	1.09933655139252			0	0	0	0	0	0	0	0	0	5.75	6.19	A	3.68833333333333	6.44623921157369	1.2	6.38546589173529	0.977900325698431
Lcl-033	nsr- nis-	Lactococcus	lactis	cremoris	50	LA	0.66	0.27	7.566	14.337	6.77	3.24416666666667	7.88833333333333	5.4	1.09933655139252			0	0	0	0	0	0	0	0	0	5.75	6.19	A	3.68833333333333	6.27840278231689	1.2	6.27312597030212	0.807083125941785
Lcl-033	nsr- nis-	Lactococcus	lactis	cremoris	50	LA	0.66	0.27	7.566	14.337	6.77	3.24416666666667	7.88833333333333	5.4	1.09933655139252			0	0	0	0	0	0	0	0	0	5.75	6.19	A	3.78833333333333	6.4440843539689	1.3	6.3833110341305	0.974623781285468
Lcl-033	nsr- nis-	Lactococcus	lactis	cremoris	50	LA	0.66	0.27	7.566	14.337	6.77	3.24416666666667	7.88833333333333	5.4	1.09933655139252			0	0	0	0	0	0	0	0	0	5.75	6.19	A	3.78833333333333	6.27840278231689	1.3	6.27312597030212	0.807083125941785
Lcl-033	nsr- nis-	Lactococcus	lactis	cremoris	50	LA	0.66	0.27	7.566	14.337	6.77	3.24416666666667	7.88833333333333	5.4	1.09933655139252			0	0	0	0	0	0	0	0	0	5.75	6.19	A	3.88833333333333	6.44623921157369	1.4	6.38546589173529	0.977900325698431
Lcl-033	nsr- nis-	Lactococcus	lactis	cremoris	50	LA	0.66	0.27	7.566	14.337	6.77	3.24416666666667	7.88833333333333	5.4	1.09933655139252			0	0	0	0	0	0	0	0	0	5.75	6.19	A	3.88833333333333	6.26910614764364	1.4	6.26382933562886	0.792947233003753
Lcl-033	nsr- nis-	Lactococcus	lactis	cremoris	50	LA	0.66	0.27	7.566	14.337	6.77	3.24416666666667	7.88833333333333	5.4	1.09933655139252			0	0	0	0	0	0	0	0	0	5.75	6.19	A	3.98833333333333	6.44623921157369	1.5	6.38546589173529	0.977900325698431
Lcl-033	nsr- nis-	Lactococcus	lactis	cremoris	50	LA	0.66	0.27	7.566	14.337	6.77	3.24416666666667	7.88833333333333	5.4	1.09933655139252			0	0	0	0	0	0	0	0	0	5.75	6.19	A	3.98833333333333	6.27122281246032	1.5	6.26594600044555	0.796165703803781
Lcl-033	nsr- nis-	Lactococcus	lactis	cremoris	50	LA	0.66	0.27	7.566	14.337	6.77	3.24416666666667	7.88833333333333	5.4	1.09933655139252			0	0	0	0	0	0	0	0	0	5.75	6.19	A	4.08833333333333	6.44623921157369	1.6	6.38546589173529	0.977900325698431
Lcl-033	nsr- nis-	Lactococcus	lactis	cremoris	50	LA	0.66	0.27	7.566	14.337	6.77	3.24416666666667	7.88833333333333	5.4	1.09933655139252			0	0	0	0	0	0	0	0	0	5.75	6.19	A	4.08833333333333	6.26438172731554	1.6	6.25910491530076	0.785763568989897
Lcl-033	nsr- nis-	Lactococcus	lactis	cremoris	50	LA	0.66	0.27	7.566	14.337	6.77	3.24416666666667	7.88833333333333	5.4	1.09933655139252			0	0	0	0	0	0	0	0	0	5.75	6.19	A	4.18866666666667	6.44839406917848	1.70033333333333	6.38762074934008	0.981176870111394
Lcl-033	nsr- nis-	Lactococcus	lactis	cremoris	50	LA	0.66	0.27	7.566	14.337	6.77	3.24416666666667	7.88833333333333	5.4	1.09933655139252			0	0	0	0	0	0	0	0	0	5.75	6.19	A	4.18866666666667	6.25937650880527	1.70033333333333	6.25409969679049	0.778152940469001
Lcl-033	nsr- nis-	Lactococcus	lactis	cremoris	50	LA	0.66	0.27	7.566	14.337	6.77	3.24416666666667	7.88833333333333	5.4	1.09933655139252			0	0	0	0	0	0	0	0	0	5.75	6.19	A	4.28866666666667	6.44515977603745	1.80033333333333	6.38438645619906	0.976259002175452
Lcl-033	nsr- nis-	Lactococcus	lactis	cremoris	50	LA	0.66	0.27	7.566	14.337	6.77	3.24416666666667	7.88833333333333	5.4	1.09933655139252			0	0	0	0	0	0	0	0	0	5.75	6.19	A	4.28866666666667	6.24368507572906	1.80033333333333	6.23840826371428	0.754293508985942
Lcl-033	nsr- nis-	Lactococcus	lactis	cremoris	50	LA	0.66	0.27	7.566	14.337	6.77	3.24416666666667	7.88833333333333	5.4	1.09933655139252			0	0	0	0	0	0	0	0	0	5.75	6.19	A	4.38866666666667	6.44731287462607	1.90033333333333	6.38653955478768	0.979532871936231
Lcl-033	nsr- nis-	Lactococcus	lactis	cremoris	50	LA	0.66	0.27	7.566	14.337	6.77	3.24416666666667	7.88833333333333	5.4	1.09933655139252			0	0	0	0	0	0	0	0	0	5.75	6.19	A	4.38866666666667	6.22954720333496	1.90033333333333	6.22427039132018	0.73279632666582
Lcl-033	nsr- nis-	Lactococcus	lactis	cremoris	50	LA	0.66	0.27	7.566	14.337	6.77	3.24416666666667	7.88833333333333	5.4	1.09933655139252			0	0	0	0	0	0	0	0	0	5.75	6.19	A	4.48833333333333	6.44946773223086	2	6.38869441239247	0.982809416349193
Lcl-033	nsr- nis-	Lactococcus	lactis	cremoris	50	LA	0.66	0.27	7.566	14.337	6.77	3.24416666666667	7.88833333333333	5.4	1.09933655139252			0	0	0	0	0	0	0	0	0	5.75	6.19	A	4.48833333333333	6.21329266612417	2	6.20801585410939	0.70808067354567
Lcl-033	nsr- nis-	Lactococcus	lactis	cremoris	50	LA	0.66	0.27	7.566	14.337	6.77	3.24416666666667	7.88833333333333	5.4	1.09933655139252			0	0	0	0	0	0	0	0	0	5.75	6.19	A	4.58833333333333	6.44946773223086	2.1	6.38869441239247	0.982809416349193
Lcl-033	nsr- nis-	Lactococcus	lactis	cremoris	50	LA	0.66	0.27	7.566	14.337	6.77	3.24416666666667	7.88833333333333	5.4	1.09933655139252			0	0	0	0	0	0	0	0	0	5.75	6.19	A	4.58833333333333	6.20599587887485	2.1	6.20071906686007	0.696985626039431
Lcl-033	nsr- nis-	Lactococcus	lactis	cremoris	50	LA	0.66	0.27	7.566	14.337	6.77	3.24416666666667	7.88833333333333	5.4	1.09933655139252			0	0	0	0	0	0	0	0	0	5.75	6.19	A	4.68866666666667	6.44946773223086	2.20033333333333	6.38869441239247	0.982809416349193
Lcl-033	nsr- nis-	Lactococcus	lactis	cremoris	50	LA	0.66	0.27	7.566	14.337	6.77	3.24416666666667	7.88833333333333	5.4	1.09933655139252			0	0	0	0	0	0	0	0	0	5.75	6.19	A	4.68866666666667	6.19686322499102	2.20033333333333	6.19158641297624	0.683099072240206
Lcl-033	nsr- nis-	Lactococcus	lactis	cremoris	50	LA	0.66	0.27	7.566	14.337	6.77	3.24416666666667	7.88833333333333	5.4	1.09933655139252			0	0	0	0	0	0	0	0	0	5.75	6.19	A	4.7883333333333304	6.45485688297668	2.3	6.39408356313829	0.9910038286981
Lcl-033	nsr- nis-	Lactococcus	lactis	cremoris	50	LA	0.66	0.27	7.566	14.337	6.77	3.24416666666667	7.88833333333333	5.4	1.09933655139252			0	0	0	0	0	0	0	0	0	5.75	6.19	A	4.7883333333333304	6.19273816239247	2.3	6.18746135037769	0.676826754858145
Lcl-033	nsr- nis-	Lactococcus	lactis	cremoris	50	LA	0.66	0.27	7.566	14.337	6.77	3.24416666666667	7.88833333333333	5.4	1.09933655139252			0	0	0	0	0	0	0	0	0	5.75	6.19	A	4.88833333333333	6.44515792519732	2.4	6.38438460535893	0.976256187901383
Lcl-033	nsr- nis-	Lactococcus	lactis	cremoris	50	LA	0.66	0.27	7.566	14.337	6.77	3.24416666666667	7.88833333333333	5.4	1.09933655139252			0	0	0	0	0	0	0	0	0	5.75	6.19	A	4.88833333333333	6.17660776158492	2.4	6.17133094957014	0.65229985594503
Lcl-033	nsr- nis-	Lactococcus	lactis	cremoris	50	LA	0.66	0.27	7.566	14.337	6.77	3.24416666666667	7.88833333333333	5.4	1.09933655139252			0	0	0	0	0	0	0	0	0	5.75	6.19	A	4.98833333333333	6.44515792519732	2.5	6.38438460535893	0.976256187901383
Lcl-033	nsr- nis-	Lactococcus	lactis	cremoris	50	LA	0.66	0.27	7.566	14.337	6.77	3.24416666666667	7.88833333333333	5.4	1.09933655139252			0	0	0	0	0	0	0	0	0	5.75	6.19	A	4.98833333333333	6.16785243167563	2.5	6.16257561966085	0.638987037857122
Lcl-033	nsr- nis-	Lactococcus	lactis	cremoris	50	LA	0.66	0.27	7.566	14.337	6.77	3.24416666666667	7.88833333333333	5.4	1.09933655139252			0	0	0	0	0	0	0	0	0	5.75	6.19	A	5.08866666666667	6.44731102378595	2.60033333333333	6.38653770394755	0.979530057662162
Lcl-033	nsr- nis-	Lactococcus	lactis	cremoris	50	LA	0.66	0.27	7.566	14.337	6.77	3.24416666666667	7.88833333333333	5.4	1.09933655139252			0	0	0	0	0	0	0	0	0	5.75	6.19	A	5.08866666666667	6.16785243167563	2.60033333333333	6.16257561966085	0.638987037857122
Lcl-033	nsr- nis-	Lactococcus	lactis	cremoris	50	LA	0.66	0.27	7.566	14.337	6.77	3.24416666666667	7.88833333333333	5.4	1.09933655139252			0	0	0	0	0	0	0	0	0	5.75	6.19	A	5.18833333333333	6.44946412237457	2.7	6.38869080253617	0.982803927422941
Lcl-033	nsr- nis-	Lactococcus	lactis	cremoris	50	LA	0.66	0.27	7.566	14.337	6.77	3.24416666666667	7.88833333333333	5.4	1.09933655139252			0	0	0	0	0	0	0	0	0	5.75	6.19	A	5.18833333333333	6.15324097614597	2.7	6.14796416413119	0.616769754044697
Lcl-033	nsr- nis-	Lactococcus	lactis	cremoris	50	LA	0.66	0.27	7.566	14.337	6.77	3.24416666666667	7.88833333333333	5.4	1.09933655139252			0	0	0	0	0	0	0	0	0	5.75	6.19	A	5.2883333333333304	6.44407497162875	2.8	6.38330165179035	0.974609515074034
Lcl-033	nsr- nis-	Lactococcus	lactis	cremoris	50	LA	0.66	0.27	7.566	14.337	6.77	3.24416666666667	7.88833333333333	5.4	1.09933655139252			0	0	0	0	0	0	0	0	0	5.75	6.19	A	5.2883333333333304	6.14430814389696	2.8	6.13903133188218	0.603187036777271
Lcl-033	nsr- nis-	Lactococcus	lactis	cremoris	50	LA	0.66	0.27	7.566	14.337	6.77	3.24416666666667	7.88833333333333	5.4	1.09933655139252			0	0	0	0	0	0	0	0	0	5.75	6.19	A	5.38833333333333	6.45377392940811	2.9	6.39300060956971	0.98935715587075
Lcl-033	nsr- nis-	Lactococcus	lactis	cremoris	50	LA	0.66	0.27	7.566	14.337	6.77	3.24416666666667	7.88833333333333	5.4	1.09933655139252			0	0	0	0	0	0	0	0	0	5.75	6.19	A	5.38833333333333	6.14709561893398	2.9	6.1418188069192	0.607425500487603
Lcl-033	nsr- nis-	Lactococcus	lactis	cremoris	50	LA	0.66	0.27	7.566	14.337	6.77	3.24416666666667	7.88833333333333	5.4	1.09933655139252			0	0	0	0	0	0	0	0	0	5.75	6.19	A	5.48916666666667	6.44838477866229	3.00083333333333	6.38761145882389	0.981162743521844
Lcl-033	nsr- nis-	Lactococcus	lactis	cremoris	50	LA	0.66	0.27	7.566	14.337	6.77	3.24416666666667	7.88833333333333	5.4	1.09933655139252			0	0	0	0	0	0	0	0	0	5.75	6.19	A	5.48916666666667	6.1412394933136	3.00083333333333	6.13596268129882	0.598521034763087
Lcl-033	nsr- nis-	Lactococcus	lactis	cremoris	50	LA	0.66	0.27	7.566	14.337	6.77	3.24416666666667	7.88833333333333	5.4	1.09933655139252			0	0	0	0	0	0	0	0	0	5.75	6.19	A	5.58833333333333	6.44623168007367	3.1	6.38545836023527	0.977888873761065
Lcl-033	nsr- nis-	Lactococcus	lactis	cremoris	50	LA	0.66	0.27	7.566	14.337	6.77	3.24416666666667	7.88833333333333	5.4	1.09933655139252			0	0	0	0	0	0	0	0	0	5.75	6.19	A	5.58833333333333	6.12662803778393	3.1	6.12135122576915	0.576303750950662
Lcl-033	nsr- nis-	Lactococcus	lactis	cremoris	50	LA	0.66	0.27	7.566	14.337	6.77	3.24416666666667	7.88833333333333	5.4	1.09933655139252			0	0	0	0	0	0	0	0	0	5.75	6.19	A	5.68833333333333	6.44623168007367	3.2	6.38545836023527	0.977888873761065
Lcl-033	nsr- nis-	Lactococcus	lactis	cremoris	50	LA	0.66	0.27	7.566	14.337	6.77	3.24416666666667	7.88833333333333	5.4	1.09933655139252			0	0	0	0	0	0	0	0	0	5.75	6.19	A	5.68833333333333	6.12662803778393	3.2	6.12135122576915	0.576303750950662
Lcl-033	nsr- nis-	Lactococcus	lactis	cremoris	50	LA	0.66	0.27	7.566	14.337	6.77	3.24416666666667	7.88833333333333	5.4	1.09933655139252			0	0	0	0	0	0	0	0	0	5.75	6.19	A	5.7883333333333304	6.44623168007367	3.3	6.38545836023527	0.977888873761065
Lcl-033	nsr- nis-	Lactococcus	lactis	cremoris	50	LA	0.66	0.27	7.566	14.337	6.77	3.24416666666667	7.88833333333333	5.4	1.09933655139252			0	0	0	0	0	0	0	0	0	5.75	6.19	A	5.7883333333333304	6.12662803778393	3.3	6.12135122576915	0.576303750950662
Lcl-033	nsr- nis-	Lactococcus	lactis	cremoris	50	LA	0.66	0.27	7.566	14.337	6.77	3.24416666666667	7.88833333333333	5.4	1.09933655139252			0	0	0	0	0	0	0	0	0	5.75	6.19	A	5.88833333333333	6.43868943073923	3.4	6.37791611090083	0.966420591651381
Lcl-033	nsr- nis-	Lactococcus	lactis	cremoris	50	LA	0.66	0.27	7.566	14.337	6.77	3.24416666666667	7.88833333333333	5.4	1.09933655139252			0	0	0	0	0	0	0	0	0	5.75	6.19	A	5.88833333333333	6.1253595080248	3.4	6.12008269601002	0.574374902341022
Lcl-033	nsr- nis-	Lactococcus	lactis	cremoris	50	LA	0.66	0.27	7.566	14.337	6.77	3.24416666666667	7.88833333333333	5.4	1.09933655139252			0	0	0	0	0	0	0	0	0	5.75	6.19	A	5.98866666666667	6.43868943073923	3.50033333333333	6.37791611090083	0.966420591651381
Lcl-033	nsr- nis-	Lactococcus	lactis	cremoris	50	LA	0.66	0.27	7.566	14.337	6.77	3.24416666666667	7.88833333333333	5.4	1.09933655139252			0	0	0	0	0	0	0	0	0	5.75	6.19	A	5.98866666666667	6.1253595080248	3.50033333333333	6.12008269601002	0.574374902341022
Lcl-033	nsr- nis-	Lactococcus	lactis	cremoris	50	LA	0.66	0.27	7.566	14.337	6.77	3.24416666666667	7.88833333333333	5.4	1.09933655139252			0	0	0	0	0	0	0	0	0	5.75	6.19	A	6.08866666666667	6.43114357154849	3.60033333333333	6.37037025171009	0.954946820615443
Lcl-033	nsr- nis-	Lactococcus	lactis	cremoris	50	LA	0.66	0.27	7.566	14.337	6.77	3.24416666666667	7.88833333333333	5.4	1.09933655139252			0	0	0	0	0	0	0	0	0	5.75	6.19	A	6.08866666666667	6.11779985587168	3.60033333333333	6.1125230438569	0.562880158571788
Lcl-033	nsr- nis-	Lactococcus	lactis	cremoris	50	LA	0.66	0.27	7.566	14.337	6.77	3.24416666666667	7.88833333333333	5.4	1.09933655139252			0	0	0	0	0	0	0	0	0	5.75	6.19	A	6.18833333333333	6.42360132221405	3.7	6.36282800237565	0.943478538505758
Lcl-033	nsr- nis-	Lactococcus	lactis	cremoris	50	LA	0.66	0.27	7.566	14.337	6.77	3.24416666666667	7.88833333333333	5.4	1.09933655139252			0	0	0	0	0	0	0	0	0	5.75	6.19	A	6.18833333333333	6.10177253478582	3.7	6.09649572277104	0.538509996366229
Lcl-033	nsr- nis-	Lactococcus	lactis	cremoris	50	LA	0.66	0.27	7.566	14.337	6.77	3.24416666666667	7.88833333333333	5.4	1.09933655139252			0	0	0	0	0	0	0	0	0	5.75	6.19	A	6.2883333333333304	6.41578562424673	3.8	6.35501230440834	0.931594467163276
Lcl-033	nsr- nis-	Lactococcus	lactis	cremoris	50	LA	0.66	0.27	7.566	14.337	6.77	3.24416666666667	7.88833333333333	5.4	1.09933655139252			0	0	0	0	0	0	0	0	0	5.75	6.19	A	6.2883333333333304	6.08574521369997	3.8	6.08046840168519	0.514139834160669
Lcl-033	nsr- nis-	Lactococcus	lactis	cremoris	50	LA	0.66	0.27	7.566	14.337	6.77	3.24416666666667	7.88833333333333	5.4	1.09933655139252			0	0	0	0	0	0	0	0	0	5.75	6.19	A	6.38883333333333	6.41012496509878	3.9005	6.34935164526039	0.922987215777537
Lcl-033	nsr- nis-	Lactococcus	lactis	cremoris	50	LA	0.66	0.27	7.566	14.337	6.77	3.24416666666667	7.88833333333333	5.4	1.09933655139252			0	0	0	0	0	0	0	0	0	5.75	6.19	A	6.38883333333333	6.07818556154685	3.9005	6.07290874953207	0.502645090391435
Lcl-033	nsr- nis-	Lactococcus	lactis	cremoris	50	LA	0.66	0.27	7.566	14.337	6.77	3.24416666666667	7.88833333333333	5.4	1.09933655139252			0	0	0	0	0	0	0	0	0	5.75	6.19	A	6.48866666666667	6.41766721443322	4.00033333333333	6.35689389459483	0.934455497887221
Lcl-033	nsr- nis-	Lactococcus	lactis	cremoris	50	LA	0.66	0.27	7.566	14.337	6.77	3.24416666666667	7.88833333333333	5.4	1.09933655139252			0	0	0	0	0	0	0	0	0	5.75	6.19	A	6.48866666666667	6.06314935872985	4.00033333333333	6.05787254671507	0.479781961884619
Lcl-033	nsr- nis-	Lactococcus	lactis	cremoris	50	LA	0.66	0.27	7.566	14.337	6.77	3.24416666666667	7.88833333333333	5.4	1.09933655139252			0	0	0	0	0	0	0	0	0	5.75	6.19	A	6.58833333333333	6.41982392287814	4.1	6.35905060303975	0.937734856574252
Lcl-033	nsr- nis-	Lactococcus	lactis	cremoris	50	LA	0.66	0.27	7.566	14.337	6.77	3.24416666666667	7.88833333333333	5.4	1.09933655139252			0	0	0	0	0	0	0	0	0	5.75	6.19	A	6.58833333333333	6.05567280806597	4.1	6.05039599605119	0.468413577147034
Lcl-033	nsr- nis-	Lactococcus	lactis	cremoris	50	LA	0.66	0.27	7.566	14.337	6.77	3.24416666666667	7.88833333333333	5.4	1.09933655139252			0	0	0	0	0	0	0	0	0	5.75	6.19	A	6.68833333333333	6.42198031379558	4.2	6.36120699395718	0.941013732448457
Lcl-033	nsr- nis-	Lactococcus	lactis	cremoris	50	LA	0.66	0.27	7.566	14.337	6.77	3.24416666666667	7.88833333333333	5.4	1.09933655139252			0	0	0	0	0	0	0	0	0	5.75	6.19	A	6.68833333333333	6.05666392633483	4.2	6.05138711432005	0.469920610845775
Lcl-033	nsr- nis-	Lactococcus	lactis	cremoris	50	LA	0.66	0.27	7.566	14.337	6.77	3.24416666666667	7.88833333333333	5.4	1.09933655139252			0	0	0	0	0	0	0	0	0	5.75	6.19	A	6.7883333333333304	6.43195240268033	4.3	6.37117908284194	0.956176679665145
Lcl-033	nsr- nis-	Lactococcus	lactis	cremoris	50	LA	0.66	0.27	7.566	14.337	6.77	3.24416666666667	7.88833333333333	5.4	1.09933655139252			0	0	0	0	0	0	0	0	0	5.75	6.19	A	6.7883333333333304	6.05864745653248	4.3	6.0533706445177	0.472936645303277
Lcl-033	nsr- nis-	Lactococcus	lactis	cremoris	50	LA	0.66	0.27	7.566	14.337	6.77	3.24416666666667	7.88833333333333	5.4	1.09933655139252			0	0	0	0	0	0	0	0	0	5.75	6.19	A	6.88833333333333	6.43195240268033	4.4	6.37117908284194	0.956176679665145
Lcl-033	nsr- nis-	Lactococcus	lactis	cremoris	50	LA	0.66	0.27	7.566	14.337	6.77	3.24416666666667	7.88833333333333	5.4	1.09933655139252			0	0	0	0	0	0	0	0	0	5.75	6.19	A	6.88833333333333	6.0511709058686	4.4	6.04589409385382	0.461568260565693
Lcl-033	nsr- nis-	Lactococcus	lactis	cremoris	50	LA	0.66	0.27	7.566	14.337	6.77	3.24416666666667	7.88833333333333	5.4	1.09933655139252			0	0	0	0	0	0	0	0	0	5.75	6.19	A	6.98866666666667	6.42441015334589	4.50033333333333	6.3636368335075	0.944708397555459
Lcl-033	nsr- nis-	Lactococcus	lactis	cremoris	50	LA	0.66	0.27	7.566	14.337	6.77	3.24416666666667	7.88833333333333	5.4	1.09933655139252			0	0	0	0	0	0	0	0	0	5.75	6.19	A	6.98866666666667	6.04302979421083	4.50033333333333	6.03775298219605	0.449189385108547
Lcl-033	nsr- nis-	Lactococcus	lactis	cremoris	50	LA	0.66	0.27	7.566	14.337	6.77	3.24416666666667	7.88833333333333	5.4	1.09933655139252			0	0	0	0	0	0	0	0	0	5.75	6.19	A	7.08866666666667	6.42441015334589	4.60033333333333	6.3636368335075	0.944708397555459
Lcl-033	nsr- nis-	Lactococcus	lactis	cremoris	50	LA	0.66	0.27	7.566	14.337	6.77	3.24416666666667	7.88833333333333	5.4	1.09933655139252			0	0	0	0	0	0	0	0	0	5.75	6.19	A	7.08866666666667	6.03488868255306	4.60033333333333	6.02961187053828	0.4368105096514
Lcl-033	nsr- nis-	Lactococcus	lactis	cremoris	50	LA	0.66	0.27	7.566	14.337	6.77	3.24416666666667	7.88833333333333	5.4	1.09933655139252			0	0	0	0	0	0	0	0	0	5.75	6.19	A	7.18866666666667	6.42225376242845	4.70033333333333	6.36148044259006	0.941429521681255
Lcl-033	nsr- nis-	Lactococcus	lactis	cremoris	50	LA	0.66	0.27	7.566	14.337	6.77	3.24416666666667	7.88833333333333	5.4	1.09933655139252			0	0	0	0	0	0	0	0	0	5.75	6.19	A	7.18866666666667	6.02748454367488	4.70033333333333	6.0222077316601	0.425552229837382
Lcl-033	nsr- nis-	Lactococcus	lactis	cremoris	50	LA	0.66	0.27	7.566	14.337	6.77	3.24416666666667	7.88833333333333	5.4	1.09933655139252			0	0	0	0	0	0	0	0	0	5.75	6.19	A	7.2883333333333304	6.42009737151102	4.8	6.35932405167262	0.93815064580705
Lcl-033	nsr- nis-	Lactococcus	lactis	cremoris	50	LA	0.66	0.27	7.566	14.337	6.77	3.24416666666667	7.88833333333333	5.4	1.09933655139252			0	0	0	0	0	0	0	0	0	5.75	6.19	A	7.2883333333333304	6.01835102008831	4.8	6.01307420807353	0.411664353621475
Lcl-033	nsr- nis-	Lactococcus	lactis	cremoris	50	LA	0.66	0.27	7.566	14.337	6.77	3.24416666666667	7.88833333333333	5.4	1.09933655139252			0	0	0	0	0	0	0	0	0	5.75	6.19	A	7.38833333333333	6.42036683512862	4.9	6.35959351529023	0.938560375669847
Lcl-033	nsr- nis-	Lactococcus	lactis	cremoris	50	LA	0.66	0.27	7.566	14.337	6.77	3.24416666666667	7.88833333333333	5.4	1.09933655139252			0	0	0	0	0	0	0	0	0	5.75	6.19	A	7.38833333333333	6.01094688121013	4.9	6.00567006919535	0.400406073807454
Lcl-033	nsr- nis-	Lactococcus	lactis	cremoris	50	LA	0.66	0.27	7.566	14.337	6.77	3.24416666666667	7.88833333333333	5.4	1.09933655139252			0	0	0	0	0	0	0	0	0	5.75	6.19	A	7.48833333333333	6.4182101266837	5	6.35743680684531	0.935281016982816
Lcl-033	nsr- nis-	Lactococcus	lactis	cremoris	50	LA	0.66	0.27	7.566	14.337	6.77	3.24416666666667	7.88833333333333	5.4	1.09933655139252			0	0	0	0	0	0	0	0	0	5.75	6.19	A	7.48833333333333	6.01021046823844	5	6.00493365622366	0.399286329373919
Lcl-033	nsr- nis-	Lactococcus	lactis	cremoris	50	LA	0.66	0.27	7.566	14.337	6.77	3.24416666666667	7.88833333333333	5.4	1.09933655139252			0	0	0	0	0	0	0	0	0	5.75	6.19	A	7.58833333333333	6.41066373463908	5.1	6.34989041480069	0.923806435721919
Lcl-033	nsr- nis-	Lactococcus	lactis	cremoris	50	LA	0.66	0.27	7.566	14.337	6.77	3.24416666666667	7.88833333333333	5.4	1.09933655139252			0	0	0	0	0	0	0	0	0	5.75	6.19	A	7.58833333333333	6.01094744101804	5.1	6.00567062900326	0.400406925017047
Lcl-033	nsr- nis-	Lactococcus	lactis	cremoris	50	LA	0.66	0.27	7.566	14.337	6.77	3.24416666666667	7.88833333333333	5.4	1.09933655139252			0	0	0	0	0	0	0	0	0	5.75	6.19	A	7.68833333333333	6.41066373463908	5.2	6.34989041480069	0.923806435721919
Lcl-033	nsr- nis-	Lactococcus	lactis	cremoris	50	LA	0.66	0.27	7.566	14.337	6.77	3.24416666666667	7.88833333333333	5.4	1.09933655139252			0	0	0	0	0	0	0	0	0	5.75	6.19	A	7.68833333333333	6.01021046823844	5.2	6.00493365622366	0.399286329373919
Lcl-033	nsr- nis-	Lactococcus	lactis	cremoris	50	LA	0.66	0.27	7.566	14.337	6.77	3.24416666666667	7.88833333333333	5.4	1.09933655139252			0	0	0	0	0	0	0	0	0	5.75	6.19	A	7.7883333333333304	6.40311734259446	5.3	6.34234402275607	0.912331854461023
Lcl-033	nsr- nis-	Lactococcus	lactis	cremoris	50	LA	0.66	0.27	7.566	14.337	6.77	3.24416666666667	7.88833333333333	5.4	1.09933655139252			0	0	0	0	0	0	0	0	0	5.75	6.19	A	7.7883333333333304	6.01094744101804	5.3	6.00567062900326	0.400406925017047
Lcl-033	nsr- nis-	Lactococcus	lactis	cremoris	50	LA	0.66	0.27	7.566	14.337	6.77	3.24416666666667	7.88833333333333	5.4	1.09933655139252			0	0	0	0	0	0	0	0	0	5.75	6.19	A	7.88833333333333	6.40096214608019	5.4	6.34018882624179	0.909054794723067
Lcl-033	nsr- nis-	Lactococcus	lactis	cremoris	50	LA	0.66	0.27	7.566	14.337	6.77	3.24416666666667	7.88833333333333	5.4	1.09933655139252			0	0	0	0	0	0	0	0	0	5.75	6.19	A	7.88833333333333	6.00286843626096	5.4	5.99759162424618	0.388122485506862
Lcl-033	nsr- nis-	Lactococcus	lactis	cremoris	50	LA	0.66	0.27	7.566	14.337	6.77	3.24416666666667	7.88833333333333	5.4	1.09933655139252			0	0	0	0	0	0	0	0	0	5.75	6.19	A	7.98833333333333	6.39557246248049	5.5	6.33479914264209	0.9008595721492
Lcl-033	nsr- nis-	Lactococcus	lactis	cremoris	50	LA	0.66	0.27	7.566	14.337	6.77	3.24416666666667	7.88833333333333	5.4	1.09933655139252			0	0	0	0	0	0	0	0	0	5.75	6.19	A	7.98833333333333	6.00434182201224	5.5	5.99906500999747	0.390362825583524
Lcl-033	nsr- nis-	Lactococcus	lactis	cremoris	50	LA	0.66	0.27	7.566	14.337	6.77	3.24416666666667	7.88833333333333	5.4	1.09933655139252			0	0	0	0	0	0	0	0	0	5.75	6.19	A	8.08866666666667	6.39557246248049	5.60033333333333	6.33479914264209	0.9008595721492
Lcl-033	nsr- nis-	Lactococcus	lactis	cremoris	50	LA	0.66	0.27	7.566	14.337	6.77	3.24416666666667	7.88833333333333	5.4	1.09933655139252			0	0	0	0	0	0	0	0	0	5.75	6.19	A	8.08866666666667	6.00434182201224	5.60033333333333	5.99906500999747	0.390362825583524
Lcl-033	nsr- nis-	Lactococcus	lactis	cremoris	50	LA	0.66	0.27	7.566	14.337	6.77	3.24416666666667	7.88833333333333	5.4	1.09933655139252			0	0	0	0	0	0	0	0	0	5.75	6.19	A	8.18833333333333	6.38802607043587	5.7	6.32725275059747	0.889384990888304
Lcl-033	nsr- nis-	Lactococcus	lactis	cremoris	50	LA	0.66	0.27	7.566	14.337	6.77	3.24416666666667	7.88833333333333	5.4	1.09933655139252			0	0	0	0	0	0	0	0	0	5.75	6.19	A	8.18833333333333	6.00434182201224	5.7	5.99906500999747	0.390362825583524
Lcl-033	nsr- nis-	Lactococcus	lactis	cremoris	50	LA	0.66	0.27	7.566	14.337	6.77	3.24416666666667	7.88833333333333	5.4	1.09933655139252			0	0	0	0	0	0	0	0	0	5.75	6.19	A	8.28866666666667	6.38802607043587	5.80033333333333	6.32725275059747	0.889384990888304
Lcl-033	nsr- nis-	Lactococcus	lactis	cremoris	50	LA	0.66	0.27	7.566	14.337	6.77	3.24416666666667	7.88833333333333	5.4	1.09933655139252			0	0	0	0	0	0	0	0	0	5.75	6.19	A	8.28866666666667	6.00434182201224	5.80033333333333	5.99906500999747	0.390362825583524
Lcl-033	nsr- nis-	Lactococcus	lactis	cremoris	50	LA	0.66	0.27	7.566	14.337	6.77	3.24416666666667	7.88833333333333	5.4	1.09933655139252			0	0	0	0	0	0	0	0	0	5.75	6.19	A	8.38866666666667	6.38802607043587	5.90033333333333	6.32725275059747	0.889384990888304
Lcl-033	nsr- nis-	Lactococcus	lactis	cremoris	50	LA	0.66	0.27	7.566	14.337	6.77	3.24416666666667	7.88833333333333	5.4	1.09933655139252			0	0	0	0	0	0	0	0	0	5.75	6.19	A	8.38866666666667	6.00434182201224	5.90033333333333	5.99906500999747	0.390362825583524
Lcl-033	nsr- nis-	Lactococcus	lactis	cremoris	50	LA	0.66	0.27	7.566	14.337	6.77	3.24416666666667	7.88833333333333	5.4	1.09933655139252			0	0	0	0	0	0	0	0	0	5.75	6.19	A	8.48866666666667	6.38210822980423	6.00033333333333	6.32133490996584	0.880386685099889
Lcl-033	nsr- nis-	Lactococcus	lactis	cremoris	50	LA	0.66	0.27	7.566	14.337	6.77	3.24416666666667	7.88833333333333	5.4	1.09933655139252			0	0	0	0	0	0	0	0	0	5.75	6.19	A	8.48866666666667	5.99626281725517	6.00033333333333	5.99098600524039	0.378078386073339
Lcl-033	nsr- nis-	Lactococcus	lactis	cremoris	50	LA	0.66	0.27	7.566	14.337	6.77	3.24416666666667	7.88833333333333	5.4	1.09933655139252			0	0	0	0	0	0	0	0	0	5.75	6.19	A	8.58833333333333	6.38210822980423	6.1	6.32133490996584	0.880386685099889
Lcl-033	nsr- nis-	Lactococcus	lactis	cremoris	50	LA	0.66	0.27	7.566	14.337	6.77	3.24416666666667	7.88833333333333	5.4	1.09933655139252			0	0	0	0	0	0	0	0	0	5.75	6.19	A	8.58833333333333	5.98818381249809	6.1	5.98290700048331	0.365793946563154
Lcl-033	nsr- nis-	Lactococcus	lactis	cremoris	50	LA	0.66	0.27	7.566	14.337	6.77	3.24416666666667	7.88833333333333	5.4	1.09933655139252			0	0	0	0	0	0	0	0	0	5.75	6.19	A	8.68866666666667	6.37834044938409	6.20033333333333	6.31756712954569	0.874657629102201
Lcl-033	nsr- nis-	Lactococcus	lactis	cremoris	50	LA	0.66	0.27	7.566	14.337	6.77	3.24416666666667	7.88833333333333	5.4	1.09933655139252			0	0	0	0	0	0	0	0	0	5.75	6.19	A	8.68866666666667	5.98132989333004	6.20033333333333	5.97605308131526	0.355372297120036
Lcl-033	nsr- nis-	Lactococcus	lactis	cremoris	50	LA	0.66	0.27	7.566	14.337	6.77	3.24416666666667	7.88833333333333	5.4	1.09933655139252			0	0	0	0	0	0	0	0	0	5.75	6.19	A	8.78833333333333	6.37054349374019	6.3	6.30977017390179	0.862802056188078
Lcl-033	nsr- nis-	Lactococcus	lactis	cremoris	50	LA	0.66	0.27	7.566	14.337	6.77	3.24416666666667	7.88833333333333	5.4	1.09933655139252			0	0	0	0	0	0	0	0	0	5.75	6.19	A	8.78833333333333	5.98059292055045	6.3	5.97531610853567	0.354251701476909
Lcl-033	nsr- nis-	Lactococcus	lactis	cremoris	50	LA	0.66	0.27	7.566	14.337	6.77	3.24416666666667	7.88833333333333	5.4	1.09933655139252			0	0	0	0	0	0	0	0	0	5.75	6.19	A	8.88866666666667	6.35685705373557	6.40033333333333	6.29608373389718	0.841991294293288
Lcl-033	nsr- nis-	Lactococcus	lactis	cremoris	50	LA	0.66	0.27	7.566	14.337	6.77	3.24416666666667	7.88833333333333	5.4	1.09933655139252			0	0	0	0	0	0	0	0	0	5.75	6.19	A	8.88866666666667	5.98793495252793	6.40033333333333	5.98265814051315	0.365415545343968
Lcl-033	nsr- nis-	Lactococcus	lactis	cremoris	50	LA	0.66	0.27	7.566	14.337	6.77	3.24416666666667	7.88833333333333	5.4	1.09933655139252			0	0	0	0	0	0	0	0	0	5.75	6.19	A	8.98866666666667	6.35685705373557	6.50033333333333	6.29608373389718	0.841991294293288
Lcl-033	nsr- nis-	Lactococcus	lactis	cremoris	50	LA	0.66	0.27	7.566	14.337	6.77	3.24416666666667	7.88833333333333	5.4	1.09933655139252			0	0	0	0	0	0	0	0	0	5.75	6.19	A	8.98866666666667	5.99527698450541	6.50033333333333	5.99000017249064	0.376579389211026
Lcl-033	nsr- nis-	Lactococcus	lactis	cremoris	50	LA	0.66	0.27	7.566	14.337	6.77	3.24416666666667	7.88833333333333	5.4	1.09933655139252			0	0	0	0	0	0	0	0	0	5.75	6.19	A	9.08866666666667	6.34317061373096	6.60033333333333	6.28239729389257	0.821180532398496
Lcl-033	nsr- nis-	Lactococcus	lactis	cremoris	50	LA	0.66	0.27	7.566	14.337	6.77	3.24416666666667	7.88833333333333	5.4	1.09933655139252			0	0	0	0	0	0	0	0	0	5.75	6.19	A	9.08866666666667	5.99576509731485	6.60033333333333	5.99048828530007	0.377321583634966
Lcl-033	nsr- nis-	Lactococcus	lactis	cremoris	50	LA	0.66	0.27	7.566	14.337	6.77	3.24416666666667	7.88833333333333	5.4	1.09933655139252			0	0	0	0	0	0	0	0	0	5.75	6.19	A	9.18866666666667	6.33325195414649	6.70033333333333	6.27247863430809	0.806098826501393
Lcl-033	nsr- nis-	Lactococcus	lactis	cremoris	50	LA	0.66	0.27	7.566	14.337	6.77	3.24416666666667	7.88833333333333	5.4	1.09933655139252			0	0	0	0	0	0	0	0	0	5.75	6.19	A	9.18866666666667	6.00335598926249	6.70033333333333	5.99807917724771	0.388863828721211
Lcl-033	nsr- nis-	Lactococcus	lactis	cremoris	50	LA	0.66	0.27	7.566	14.337	6.77	3.24416666666667	7.88833333333333	5.4	1.09933655139252			0	0	0	0	0	0	0	0	0	5.75	6.19	A	9.28866666666667	6.32923343378376	6.80033333333333	6.26846011394536	0.799988510713651
Lcl-033	nsr- nis-	Lactococcus	lactis	cremoris	50	LA	0.66	0.27	7.566	14.337	6.77	3.24416666666667	7.88833333333333	5.4	1.09933655139252			0	0	0	0	0	0	0	0	0	5.75	6.19	A	9.28866666666667	5.99650207009445	6.80033333333333	5.99122525807967	0.378442179278093
Lcl-033	nsr- nis-	Lactococcus	lactis	cremoris	50	LA	0.66	0.27	7.566	14.337	6.77	3.24416666666667	7.88833333333333	5.4	1.09933655139252			0	0	0	0	0	0	0	0	0	5.75	6.19	A	9.38833333333333	6.33915209336823	6.9	6.27837877352983	0.815070216610753
Lcl-033	nsr- nis-	Lactococcus	lactis	cremoris	50	LA	0.66	0.27	7.566	14.337	6.77	3.24416666666667	7.88833333333333	5.4	1.09933655139252			0	0	0	0	0	0	0	0	0	5.75	6.19	A	9.38833333333333	5.9896481509264	6.9	5.98437133891162	0.368020529834974
Lcl-033	nsr- nis-	Lactococcus	lactis	cremoris	50	LA	0.66	0.27	7.566	14.337	6.77	3.24416666666667	7.88833333333333	5.4	1.09933655139252			0	0	0	0	0	0	0	0	0	5.75	6.19	A	9.48833333333333	6.33325445799323	7	6.27248113815484	0.806102633697304
Lcl-033	nsr- nis-	Lactococcus	lactis	cremoris	50	LA	0.66	0.27	7.566	14.337	6.77	3.24416666666667	7.88833333333333	5.4	1.09933655139252			0	0	0	0	0	0	0	0	0	5.75	6.19	A	9.48833333333333	5.98230611894892	7	5.97702930693414	0.356856685967917
Lcl-033	nsr- nis-	Lactococcus	lactis	cremoris	50	LA	0.66	0.27	7.566	14.337	6.77	3.24416666666667	7.88833333333333	5.4	1.09933655139252			0	0	0	0	0	0	0	0	0	5.75	6.19	A	9.58833333333333	6.33512542199122	7.1	6.27435210215282	0.808947506890231
Lcl-033	nsr- nis-	Lactococcus	lactis	cremoris	50	LA	0.66	0.27	7.566	14.337	6.77	3.24416666666667	7.88833333333333	5.4	1.09933655139252			0	0	0	0	0	0	0	0	0	5.75	6.19	A	9.58833333333333	5.98181800613948	7.1	5.9765411941247	0.356114491543976
Lcl-033	nsr- nis-	Lactococcus	lactis	cremoris	50	LA	0.66	0.27	7.566	14.337	6.77	3.24416666666667	7.88833333333333	5.4	1.09933655139252			0	0	0	0	0	0	0	0	0	5.75	6.19	A	9.68833333333333	6.3369963859892	7.2	6.2762230661508	0.811792380083157
Lcl-033	nsr- nis-	Lactococcus	lactis	cremoris	50	LA	0.66	0.27	7.566	14.337	6.77	3.24416666666667	7.88833333333333	5.4	1.09933655139252			0	0	0	0	0	0	0	0	0	5.75	6.19	A	9.68833333333333	5.96667596125607	7.2	5.96139914924129	0.333090426077528
Lcl-033	nsr- nis-	Lactococcus	lactis	cremoris	50	LA	0.66	0.27	7.566	14.337	6.77	3.24416666666667	7.88833333333333	5.4	1.09933655139252			0	0	0	0	0	0	0	0	0	5.75	6.19	A	9.78833333333333	6.3369963859892	7.3	6.2762230661508	0.811792380083157
Lcl-033	nsr- nis-	Lactococcus	lactis	cremoris	50	LA	0.66	0.27	7.566	14.337	6.77	3.24416666666667	7.88833333333333	5.4	1.09933655139252			0	0	0	0	0	0	0	0	0	5.75	6.19	A	9.78833333333333	5.9591248083203	7.3	5.95384799630553	0.321608605697326
Lcl-033	nsr- nis-	Lactococcus	lactis	cremoris	50	LA	0.66	0.27	7.566	14.337	6.77	3.24416666666667	7.88833333333333	5.4	1.09933655139252			0	0	0	0	0	0	0	0	0	5.75	6.19	A	9.88833333333333	6.32894869040271	7.4	6.26817537056431	0.799555547378982
Lcl-033	nsr- nis-	Lactococcus	lactis	cremoris	50	LA	0.66	0.27	7.566	14.337	6.77	3.24416666666667	7.88833333333333	5.4	1.09933655139252			0	0	0	0	0	0	0	0	0	5.75	6.19	A	9.88833333333333	5.95157365538454	7.4	5.94629684336976	0.310126785317122
Lcl-033	nsr- nis-	Lactococcus	lactis	cremoris	50	LA	0.66	0.27	7.566	14.337	6.77	3.24416666666667	7.88833333333333	5.4	1.09933655139252			0	0	0	0	0	0	0	0	0	5.75	6.19	A	9.98833333333333	6.32894869040271	7.5	6.26817537056431	0.799555547378982
Lcl-033	nsr- nis-	Lactococcus	lactis	cremoris	50	LA	0.66	0.27	7.566	14.337	6.77	3.24416666666667	7.88833333333333	5.4	1.09933655139252			0	0	0	0	0	0	0	0	0	5.75	6.19	A	9.98833333333333	5.95206176819398	7.5	5.9467849561792	0.310868979741063
Lcl-033	nsr- nis-	Lactococcus	lactis	cremoris	50	LA	0.66	0.27	7.566	14.337	6.77	3.24416666666667	7.88833333333333	5.4	1.09933655139252			0	0	0	0	0	0	0	0	0	5.75	6.19	A	10.0883333333333	6.32281317114828	7.6	6.26203985130988	0.790226252817223
Lcl-033	nsr- nis-	Lactococcus	lactis	cremoris	50	LA	0.66	0.27	7.566	14.337	6.77	3.24416666666667	7.88833333333333	5.4	1.09933655139252			0	0	0	0	0	0	0	0	0	5.75	6.19	A	10.0883333333333	5.95254988100341	7.6	5.94727306898864	0.311611174165003
Lcl-033	nsr- nis-	Lactococcus	lactis	cremoris	50	LA	0.66	0.27	7.566	14.337	6.77	3.24416666666667	7.88833333333333	5.4	1.09933655139252			0	0	0	0	0	0	0	0	0	5.75	6.19	A	10.1883333333333	6.31667765189385	7.7	6.25590433205545	0.780896958255465
Lcl-033	nsr- nis-	Lactococcus	lactis	cremoris	50	LA	0.66	0.27	7.566	14.337	6.77	3.24416666666667	7.88833333333333	5.4	1.09933655139252			0	0	0	0	0	0	0	0	0	5.75	6.19	A	10.1883333333333	5.96010103393918	7.7	5.9548242219244	0.323092994545206
Lcl-033	nsr- nis-	Lactococcus	lactis	cremoris	50	LA	0.66	0.27	7.566	14.337	6.77	3.24416666666667	7.88833333333333	5.4	1.09933655139252			0	0	0	0	0	0	0	0	0	5.75	6.19	A	10.2883333333333	6.31054213263941	7.8	6.24976881280102	0.771567663693706
Lcl-033	nsr- nis-	Lactococcus	lactis	cremoris	50	LA	0.66	0.27	7.566	14.337	6.77	3.24416666666667	7.88833333333333	5.4	1.09933655139252			0	0	0	0	0	0	0	0	0	5.75	6.19	A	10.2883333333333	5.96034425696945	7.8	5.95506744495467	0.323462824579054
Lcl-033	nsr- nis-	Lactococcus	lactis	cremoris	50	LA	0.66	0.27	7.566	14.337	6.77	3.24416666666667	7.88833333333333	5.4	1.09933655139252			0	0	0	0	0	0	0	0	0	5.75	6.19	A	10.3888333333333	6.31054213263941	7.9005	6.24976881280102	0.771567663693706
Lcl-033	nsr- nis-	Lactococcus	lactis	cremoris	50	LA	0.66	0.27	7.566	14.337	6.77	3.24416666666667	7.88833333333333	5.4	1.09933655139252			0	0	0	0	0	0	0	0	0	5.75	6.19	A	10.3888333333333	5.96034425696945	7.9005	5.95506744495467	0.323462824579054
Lcl-033	nsr- nis-	Lactococcus	lactis	cremoris	50	LA	0.66	0.27	7.566	14.337	6.77	3.24416666666667	7.88833333333333	5.4	1.09933655139252			0	0	0	0	0	0	0	0	0	5.75	6.19	A	10.4886666666667	6.30254657812498	8.00033333333333	6.24177325828659	0.759410113508222
Lcl-033	nsr- nis-	Lactococcus	lactis	cremoris	50	LA	0.66	0.27	7.566	14.337	6.77	3.24416666666667	7.88833333333333	5.4	1.09933655139252			0	0	0	0	0	0	0	0	0	5.75	6.19	A	10.4886666666667	5.95279310403368	8.00033333333333	5.9475162920189	0.311981004198851
Lcl-033	nsr- nis-	Lactococcus	lactis	cremoris	50	LA	0.66	0.27	7.566	14.337	6.77	3.24416666666667	7.88833333333333	5.4	1.09933655139252			0	0	0	0	0	0	0	0	0	5.75	6.19	A	10.5883333333333	6.29433875455028	8.1	6.23356543471188	0.746929799998646
Lcl-033	nsr- nis-	Lactococcus	lactis	cremoris	50	LA	0.66	0.27	7.566	14.337	6.77	3.24416666666667	7.88833333333333	5.4	1.09933655139252			0	0	0	0	0	0	0	0	0	5.75	6.19	A	10.5883333333333	5.94524195109791	8.1	5.93996513908313	0.300499183818648
Lcl-033	nsr- nis-	Lactococcus	lactis	cremoris	50	LA	0.66	0.27	7.566	14.337	6.77	3.24416666666667	7.88833333333333	5.4	1.09933655139252			0	0	0	0	0	0	0	0	0	5.75	6.19	A	10.6886666666667	6.29247871929027	8.20033333333333	6.23170539945188	0.744101544374919
Lcl-033	nsr- nis-	Lactococcus	lactis	cremoris	50	LA	0.66	0.27	7.566	14.337	6.77	3.24416666666667	7.88833333333333	5.4	1.09933655139252			0	0	0	0	0	0	0	0	0	5.75	6.19	A	10.6886666666667	5.93793402119241	8.20033333333333	5.93265720917763	0.289387193472293
Lcl-033	nsr- nis-	Lactococcus	lactis	cremoris	50	LA	0.66	0.27	7.566	14.337	6.77	3.24416666666667	7.88833333333333	5.4	1.09933655139252			0	0	0	0	0	0	0	0	0	5.75	6.19	A	10.7886666666667	6.2861173919281	8.30033333333333	6.22534407208971	0.734428899843226
Lcl-033	nsr- nis-	Lactococcus	lactis	cremoris	50	LA	0.66	0.27	7.566	14.337	6.77	3.24416666666667	7.88833333333333	5.4	1.09933655139252			0	0	0	0	0	0	0	0	0	5.75	6.19	A	10.7886666666667	5.93793402119241	8.30033333333333	5.93265720917763	0.289387193472293
Lcl-033	nsr- nis-	Lactococcus	lactis	cremoris	50	LA	0.66	0.27	7.566	14.337	6.77	3.24416666666667	7.88833333333333	5.4	1.09933655139252			0	0	0	0	0	0	0	0	0	5.75	6.19	A	10.8886666666667	6.2736205453115	8.40033333333333	6.21284722547311	0.715426960749775
Lcl-033	nsr- nis-	Lactococcus	lactis	cremoris	50	LA	0.66	0.27	7.566	14.337	6.77	3.24416666666667	7.88833333333333	5.4	1.09933655139252			0	0	0	0	0	0	0	0	0	5.75	6.19	A	10.8886666666667	5.93817724422267	8.40033333333333	5.9329004322079	0.28975702350614
Lcl-033	nsr- nis-	Lactococcus	lactis	cremoris	50	LA	0.66	0.27	7.566	14.337	6.77	3.24416666666667	7.88833333333333	5.4	1.09933655139252			0	0	0	0	0	0	0	0	0	5.75	6.19	A	10.9886666666667	6.26911925320933	8.50033333333333	6.20834593337094	0.70858257184181
Lcl-033	nsr- nis-	Lactococcus	lactis	cremoris	50	LA	0.66	0.27	7.566	14.337	6.77	3.24416666666667	7.88833333333333	5.4	1.09933655139252			0	0	0	0	0	0	0	0	0	5.75	6.19	A	10.9886666666667	5.93842046725294	8.50033333333333	5.93314365523816	0.290126853539988
Lcl-033	nsr- nis-	Lactococcus	lactis	cremoris	50	LA	0.66	0.27	7.566	14.337	6.77	3.24416666666667	7.88833333333333	5.4	1.09933655139252			0	0	0	0	0	0	0	0	0	5.75	6.19	A	11.0886666666667	6.27096574942186	8.60033333333333	6.21019242958347	0.711390240819692
Lcl-033	nsr- nis-	Lactococcus	lactis	cremoris	50	LA	0.66	0.27	7.566	14.337	6.77	3.24416666666667	7.88833333333333	5.4	1.09933655139252			0	0	0	0	0	0	0	0	0	5.75	6.19	A	11.0886666666667	5.9386636902832	8.60033333333333	5.93338687826842	0.290496683573837
Lcl-033	nsr- nis-	Lactococcus	lactis	cremoris	50	LA	0.66	0.27	7.566	14.337	6.77	3.24416666666667	7.88833333333333	5.4	1.09933655139252			0	0	0	0	0	0	0	0	0	5.75	6.19	A	11.1886666666667	6.25832042042495	8.70033333333333	6.19754710058655	0.692162528518508
Lcl-033	nsr- nis-	Lactococcus	lactis	cremoris	50	LA	0.66	0.27	7.566	14.337	6.77	3.24416666666667	7.88833333333333	5.4	1.09933655139252			0	0	0	0	0	0	0	0	0	5.75	6.19	A	11.1886666666667	5.93136909718794	8.70033333333333	5.92609228517317	0.27940497236379
Lcl-033	nsr- nis-	Lactococcus	lactis	cremoris	50	LA	0.66	0.27	7.566	14.337	6.77	3.24416666666667	7.88833333333333	5.4	1.09933655139252			0	0	0	0	0	0	0	0	0	5.75	6.19	A	11.2886666666667	6.25832042042495	8.80033333333333	6.19754710058655	0.692162528518508
Lcl-033	nsr- nis-	Lactococcus	lactis	cremoris	50	LA	0.66	0.27	7.566	14.337	6.77	3.24416666666667	7.88833333333333	5.4	1.09933655139252			0	0	0	0	0	0	0	0	0	5.75	6.19	A	11.2886666666667	5.92407450409269	8.80033333333333	5.91879769207791	0.268313261153742
Lcl-033	nsr- nis-	Lactococcus	lactis	cremoris	50	LA	0.66	0.27	7.566	14.337	6.77	3.24416666666667	7.88833333333333	5.4	1.09933655139252			0	0	0	0	0	0	0	0	0	5.75	6.19	A	11.3883333333333	6.25832042042495	8.9	6.19754710058655	0.692162528518508
Lcl-033	nsr- nis-	Lactococcus	lactis	cremoris	50	LA	0.66	0.27	7.566	14.337	6.77	3.24416666666667	7.88833333333333	5.4	1.09933655139252			0	0	0	0	0	0	0	0	0	5.75	6.19	A	11.3883333333333	5.91677991099743	8.9	5.91150309898265	0.257221549943695
Lcl-033	nsr- nis-	Lactococcus	lactis	cremoris	50	LA	0.66	0.27	7.566	14.337	6.77	3.24416666666667	7.88833333333333	5.4	1.09933655139252			0	0	0	0	0	0	0	0	0	5.75	6.19	A	11.4883333333333	6.2501763835302	9	6.1894030636918	0.679779205125291
Lcl-033	nsr- nis-	Lactococcus	lactis	cremoris	50	LA	0.66	0.27	7.566	14.337	6.77	3.24416666666667	7.88833333333333	5.4	1.09933655139252			0	0	0	0	0	0	0	0	0	5.75	6.19	A	11.4883333333333	5.90948531790217	9	5.90420850588739	0.246129838733647
Lcl-033	nsr- nis-	Lactococcus	lactis	cremoris	50	LA	0.66	0.27	7.566	14.337	6.77	3.24416666666667	7.88833333333333	5.4	1.09933655139252			0	0	0	0	0	0	0	0	0	5.75	6.19	A	11.5883333333333	6.24203234663545	9.1	6.18125902679706	0.667395881732073
Lcl-033	nsr- nis-	Lactococcus	lactis	cremoris	50	LA	0.66	0.27	7.566	14.337	6.77	3.24416666666667	7.88833333333333	5.4	1.09933655139252			0	0	0	0	0	0	0	0	0	5.75	6.19	A	11.5883333333333	5.90219072480691	9.1	5.89691391279213	0.2350381275236
Lcl-033	nsr- nis-	Lactococcus	lactis	cremoris	50	LA	0.66	0.27	7.566	14.337	6.77	3.24416666666667	7.88833333333333	5.4	1.09933655139252			0	0	0	0	0	0	0	0	0	5.75	6.19	A	11.6883333333333	6.24203234663545	9.2	6.18125902679706	0.667395881732073
Lcl-033	nsr- nis-	Lactococcus	lactis	cremoris	50	LA	0.66	0.27	7.566	14.337	6.77	3.24416666666667	7.88833333333333	5.4	1.09933655139252			0	0	0	0	0	0	0	0	0	5.75	6.19	A	11.6883333333333	5.90219072480691	9.2	5.89691391279213	0.2350381275236
Lcl-033	nsr- nis-	Lactococcus	lactis	cremoris	50	LA	0.66	0.27	7.566	14.337	6.77	3.24416666666667	7.88833333333333	5.4	1.09933655139252			0	0	0	0	0	0	0	0	0	5.75	6.19	A	11.7883333333333	6.24203234663545	9.3	6.18125902679706	0.667395881732073
Lcl-033	nsr- nis-	Lactococcus	lactis	cremoris	50	LA	0.66	0.27	7.566	14.337	6.77	3.24416666666667	7.88833333333333	5.4	1.09933655139252			0	0	0	0	0	0	0	0	0	5.75	6.19	A	11.7883333333333	5.89512543131395	9.3	5.88984861929917	0.224295075236132
Lcl-033	nsr- nis-	Lactococcus	lactis	cremoris	50	LA	0.66	0.27	7.566	14.337	6.77	3.24416666666667	7.88833333333333	5.4	1.09933655139252			0	0	0	0	0	0	0	0	0	5.75	6.19	A	11.8883333333333	6.24203234663545	9.4	6.18125902679706	0.667395881732073
Lcl-033	nsr- nis-	Lactococcus	lactis	cremoris	50	LA	0.66	0.27	7.566	14.337	6.77	3.24416666666667	7.88833333333333	5.4	1.09933655139252			0	0	0	0	0	0	0	0	0	5.75	6.19	A	11.8883333333333	5.89512543131395	9.4	5.88984861929917	0.224295075236132
Lcl-033	nsr- nis-	Lactococcus	lactis	cremoris	50	LA	0.66	0.27	7.566	14.337	6.77	3.24416666666667	7.88833333333333	5.4	1.09933655139252			0	0	0	0	0	0	0	0	0	5.75	6.19	A	11.9883333333333	6.2501763835302	9.5	6.1894030636918	0.679779205125291
Lcl-033	nsr- nis-	Lactococcus	lactis	cremoris	50	LA	0.66	0.27	7.566	14.337	6.77	3.24416666666667	7.88833333333333	5.4	1.09933655139252			0	0	0	0	0	0	0	0	0	5.75	6.19	A	11.9883333333333	5.90242002440921	9.5	5.89714321239443	0.235386786446179
Lcl-033	nsr- nis-	Lactococcus	lactis	cremoris	50	LA	0.66	0.27	7.566	14.337	6.77	3.24416666666667	7.88833333333333	5.4	1.09933655139252			0	0	0	0	0	0	0	0	0	5.75	6.19	A	12.0883333333333	6.25832042042495	9.6	6.19754710058655	0.692162528518508
Lcl-033	nsr- nis-	Lactococcus	lactis	cremoris	50	LA	0.66	0.27	7.566	14.337	6.77	3.24416666666667	7.88833333333333	5.4	1.09933655139252			0	0	0	0	0	0	0	0	0	5.75	6.19	A	12.0883333333333	5.8951105072945	9.6	5.88983369527972	0.224272382686773
Lcl-033	nsr- nis-	Lactococcus	lactis	cremoris	50	LA	0.66	0.27	7.566	14.337	6.77	3.24416666666667	7.88833333333333	5.4	1.09933655139252			0	0	0	0	0	0	0	0	0	5.75	6.19	A	12.1883333333333	6.25988981478014	9.7	6.19911649494174	0.694548853394361
Lcl-033	nsr- nis-	Lactococcus	lactis	cremoris	50	LA	0.66	0.27	7.566	14.337	6.77	3.24416666666667	7.88833333333333	5.4	1.09933655139252			0	0	0	0	0	0	0	0	0	5.75	6.19	A	12.1883333333333	5.88780099017978	9.7	5.882524178165	0.213157978927366
Lcl-033	nsr- nis-	Lactococcus	lactis	cremoris	50	LA	0.66	0.27	7.566	14.337	6.77	3.24416666666667	7.88833333333333	5.4	1.09933655139252			0	0	0	0	0	0	0	0	0	5.75	6.19	A	12.2883333333333	6.2452441721909	9.8	6.1844708523525	0.672279586834308
Lcl-033	nsr- nis-	Lactococcus	lactis	cremoris	50	LA	0.66	0.27	7.566	14.337	6.77	3.24416666666667	7.88833333333333	5.4	1.09933655139252			0	0	0	0	0	0	0	0	0	5.75	6.19	A	12.2883333333333	5.88780099017978	9.8	5.882524178165	0.213157978927366
Lcl-033	nsr- nis-	Lactococcus	lactis	cremoris	50	LA	0.66	0.27	7.566	14.337	6.77	3.24416666666667	7.88833333333333	5.4	1.09933655139252			0	0	0	0	0	0	0	0	0	5.75	6.19	A	12.3883333333333	6.23059852960166	9.9	6.16982520976326	0.650010320274257
Lcl-033	nsr- nis-	Lactococcus	lactis	cremoris	50	LA	0.66	0.27	7.566	14.337	6.77	3.24416666666667	7.88833333333333	5.4	1.09933655139252			0	0	0	0	0	0	0	0	0	5.75	6.19	A	12.3883333333333	5.88780099017978	9.9	5.882524178165	0.213157978927366
Lcl-033	nsr- nis-	Lactococcus	lactis	cremoris	50	LA	0.66	0.27	7.566	14.337	6.77	3.24416666666667	7.88833333333333	5.4	1.09933655139252			0	0	0	0	0	0	0	0	0	5.75	6.19	A	12.4883333333333	6.21750764883933	10	6.15673432900093	0.63010512926432
Lcl-033	nsr- nis-	Lactococcus	lactis	cremoris	50	LA	0.66	0.27	7.566	14.337	6.77	3.24416666666667	7.88833333333333	5.4	1.09933655139252			0	0	0	0	0	0	0	0	0	5.75	6.19	A	12.4883333333333	5.88050639708452	10	5.87522958506975	0.202066267717319
Lcl-033	nsr- nis-	Lactococcus	lactis	cremoris	50	LA	0.66	0.27	7.566	14.337	6.77	3.24416666666667	7.88833333333333	5.4	1.09933655139252			0	0	0	0	0	0	0	0	0	5.75	6.19	A	12.5886666666667	6.21093300629977	10.1003333333333	6.15015968646138	0.620108130746955
Lcl-033	nsr- nis-	Lactococcus	lactis	cremoris	50	LA	0.66	0.27	7.566	14.337	6.77	3.24416666666667	7.88833333333333	5.4	1.09933655139252			0	0	0	0	0	0	0	0	0	5.75	6.19	A	12.5886666666667	5.88781591419924	10.1003333333333	5.88253910218446	0.213180671476725
Lcl-033	nsr- nis-	Lactococcus	lactis	cremoris	50	LA	0.66	0.27	7.566	14.337	6.77	3.24416666666667	7.88833333333333	5.4	1.09933655139252			0	0	0	0	0	0	0	0	0	5.75	6.19	A	12.6886666666667	6.21093300629977	10.2003333333333	6.15015968646138	0.620108130746955
Lcl-033	nsr- nis-	Lactococcus	lactis	cremoris	50	LA	0.66	0.27	7.566	14.337	6.77	3.24416666666667	7.88833333333333	5.4	1.09933655139252			0	0	0	0	0	0	0	0	0	5.75	6.19	A	12.6886666666667	5.89512543131395	10.2003333333333	5.88984861929917	0.224295075236132
Lcl-033	nsr- nis-	Lactococcus	lactis	cremoris	50	LA	0.66	0.27	7.566	14.337	6.77	3.24416666666667	7.88833333333333	5.4	1.09933655139252			0	0	0	0	0	0	0	0	0	5.75	6.19	A	12.7886666666667	6.21093300629977	10.3003333333333	6.15015968646138	0.620108130746955
Lcl-033	nsr- nis-	Lactococcus	lactis	cremoris	50	LA	0.66	0.27	7.566	14.337	6.77	3.24416666666667	7.88833333333333	5.4	1.09933655139252			0	0	0	0	0	0	0	0	0	5.75	6.19	A	12.7886666666667	5.88801681688666	10.3003333333333	5.88274000487188	0.213486151790858
Lcl-033	nsr- nis-	Lactococcus	lactis	cremoris	50	LA	0.66	0.27	7.566	14.337	6.77	3.24416666666667	7.88833333333333	5.4	1.09933655139252			0	0	0	0	0	0	0	0	0	5.75	6.19	A	12.8883333333333	6.21900400634945	10.4	6.15823068651106	0.632380398789643
Lcl-033	nsr- nis-	Lactococcus	lactis	cremoris	50	LA	0.66	0.27	7.566	14.337	6.77	3.24416666666667	7.88833333333333	5.4	1.09933655139252			0	0	0	0	0	0	0	0	0	5.75	6.19	A	12.8883333333333	5.87359662117614	10.4	5.86831980916136	0.191559685938032
Lcl-033	nsr- nis-	Lactococcus	lactis	cremoris	50	LA	0.66	0.27	7.566	14.337	6.77	3.24416666666667	7.88833333333333	5.4	1.09933655139252			0	0	0	0	0	0	0	0	0	5.75	6.19	A	12.9883333333333	6.22552024457222	10.5	6.16474692473382	0.642288591282214
Lcl-033	nsr- nis-	Lactococcus	lactis	cremoris	50	LA	0.66	0.27	7.566	14.337	6.77	3.24416666666667	7.88833333333333	5.4	1.09933655139252			0	0	0	0	0	0	0	0	0	5.75	6.19	A	12.9883333333333	5.87359662117614	10.5	5.86831980916136	0.191559685938032
Lcl-033	nsr- nis-	Lactococcus	lactis	cremoris	50	LA	0.66	0.27	7.566	14.337	6.77	3.24416666666667	7.88833333333333	5.4	1.09933655139252			0	0	0	0	0	0	0	0	0	5.75	6.19	A	13.0886666666667	6.22552024457222	10.6003333333333	6.16474692473382	0.642288591282214
Lcl-033	nsr- nis-	Lactococcus	lactis	cremoris	50	LA	0.66	0.27	7.566	14.337	6.77	3.24416666666667	7.88833333333333	5.4	1.09933655139252			0	0	0	0	0	0	0	0	0	5.75	6.19	A	13.0886666666667	5.87359662117614	10.6003333333333	5.86831980916136	0.191559685938032
Lcl-033	nsr- nis-	Lactococcus	lactis	cremoris	50	LA	0.66	0.27	7.566	14.337	6.77	3.24416666666667	7.88833333333333	5.4	1.09933655139252			0	0	0	0	0	0	0	0	0	5.75	6.19	A	13.1886666666667	6.21101019965873	10.7003333333333	6.15023687982033	0.620225506237774
Lcl-033	nsr- nis-	Lactococcus	lactis	cremoris	50	LA	0.66	0.27	7.566	14.337	6.77	3.24416666666667	7.88833333333333	5.4	1.09933655139252			0	0	0	0	0	0	0	0	0	5.75	6.19	A	13.1886666666667	5.85917642546562	10.7003333333333	5.85389961345084	0.169633220085205
Lcl-033	nsr- nis-	Lactococcus	lactis	cremoris	50	LA	0.66	0.27	7.566	14.337	6.77	3.24416666666667	7.88833333333333	5.4	1.09933655139252			0	0	0	0	0	0	0	0	0	5.75	6.19	A	13.2886666666667	6.2058538806963	10.8003333333333	6.14508056085791	0.612385123629556
Lcl-033	nsr- nis-	Lactococcus	lactis	cremoris	50	LA	0.66	0.27	7.566	14.337	6.77	3.24416666666667	7.88833333333333	5.4	1.09933655139252			0	0	0	0	0	0	0	0	0	5.75	6.19	A	13.2886666666667	5.86604081627116	10.8003333333333	5.86076400425638	0.180070792058542
Lcl-033	nsr- nis-	Lactococcus	lactis	cremoris	50	LA	0.66	0.27	7.566	14.337	6.77	3.24416666666667	7.88833333333333	5.4	1.09933655139252			0	0	0	0	0	0	0	0	0	5.75	6.19	A	13.3886666666667	6.19933764247354	10.9003333333333	6.13856432263514	0.602476931136984
Lcl-033	nsr- nis-	Lactococcus	lactis	cremoris	50	LA	0.66	0.27	7.566	14.337	6.77	3.24416666666667	7.88833333333333	5.4	1.09933655139252			0	0	0	0	0	0	0	0	0	5.75	6.19	A	13.3886666666667	5.86604081627116	10.9003333333333	5.86076400425638	0.180070792058542
Lcl-033	nsr- nis-	Lactococcus	lactis	cremoris	50	LA	0.66	0.27	7.566	14.337	6.77	3.24416666666667	7.88833333333333	5.4	1.09933655139252			0	0	0	0	0	0	0	0	0	5.75	6.19	A	13.4886666666667	6.19437974726829	11.0003333333333	6.1336064274299	0.594938259533492
Lcl-033	nsr- nis-	Lactococcus	lactis	cremoris	50	LA	0.66	0.27	7.566	14.337	6.77	3.24416666666667	7.88833333333333	5.4	1.09933655139252			0	0	0	0	0	0	0	0	0	5.75	6.19	A	13.4886666666667	5.85162062056064	11.0003333333333	5.84634380854586	0.158144326205715
Lcl-033	nsr- nis-	Lactococcus	lactis	cremoris	50	LA	0.66	0.27	7.566	14.337	6.77	3.24416666666667	7.88833333333333	5.4	1.09933655139252			0	0	0	0	0	0	0	0	0	5.75	6.19	A	13.5883333333333	6.18942185206305	11.1	6.12864853222465	0.587399587929998
Lcl-033	nsr- nis-	Lactococcus	lactis	cremoris	50	LA	0.66	0.27	7.566	14.337	6.77	3.24416666666667	7.88833333333333	5.4	1.09933655139252			0	0	0	0	0	0	0	0	0	5.75	6.19	A	13.5883333333333	5.8367075716561	11.1	5.83143075964132	0.135468457990668
Lcl-033	nsr- nis-	Lactococcus	lactis	cremoris	50	LA	0.66	0.27	7.566	14.337	6.77	3.24416666666667	7.88833333333333	5.4	1.09933655139252			0	0	0	0	0	0	0	0	0	5.75	6.19	A	13.6886666666667	6.19741565875377	11.2003333333333	6.13664233891538	0.599554480481867
Lcl-033	nsr- nis-	Lactococcus	lactis	cremoris	50	LA	0.66	0.27	7.566	14.337	6.77	3.24416666666667	7.88833333333333	5.4	1.09933655139252			0	0	0	0	0	0	0	0	0	5.75	6.19	A	13.6886666666667	5.8367075716561	11.2003333333333	5.83143075964132	0.135468457990668
Lcl-033	nsr- nis-	Lactococcus	lactis	cremoris	50	LA	0.66	0.27	7.566	14.337	6.77	3.24416666666667	7.88833333333333	5.4	1.09933655139252			0	0	0	0	0	0	0	0	0	5.75	6.19	A	13.7886666666667	6.20568508256063	11.3003333333333	6.14491176272224	0.61212845952928
Lcl-033	nsr- nis-	Lactococcus	lactis	cremoris	50	LA	0.66	0.27	7.566	14.337	6.77	3.24416666666667	7.88833333333333	5.4	1.09933655139252			0	0	0	0	0	0	0	0	0	5.75	6.19	A	13.7886666666667	5.82910403986627	11.3003333333333	5.82382722785149	0.123906993535028
Lcl-033	nsr- nis-	Lactococcus	lactis	cremoris	50	LA	0.66	0.27	7.566	14.337	6.77	3.24416666666667	7.88833333333333	5.4	1.09933655139252			0	0	0	0	0	0	0	0	0	5.75	6.19	A	13.8886666666667	6.20724342557815	11.4003333333333	6.14647010573976	0.614497980418358
Lcl-033	nsr- nis-	Lactococcus	lactis	cremoris	50	LA	0.66	0.27	7.566	14.337	6.77	3.24416666666667	7.88833333333333	5.4	1.09933655139252			0	0	0	0	0	0	0	0	0	5.75	6.19	A	13.8886666666667	5.82861118667225	11.4003333333333	5.82333437465747	0.123157591172805
Lcl-033	nsr- nis-	Lactococcus	lactis	cremoris	50	LA	0.66	0.27	7.566	14.337	6.77	3.24416666666667	7.88833333333333	5.4	1.09933655139252			0	0	0	0	0	0	0	0	0	5.75	6.19	A	13.9886666666667	6.20724342557815	11.5003333333333	6.14647010573976	0.614497980418358
Lcl-033	nsr- nis-	Lactococcus	lactis	cremoris	50	LA	0.66	0.27	7.566	14.337	6.77	3.24416666666667	7.88833333333333	5.4	1.09933655139252			0	0	0	0	0	0	0	0	0	5.75	6.19	A	13.9886666666667	5.82811833347823	11.5003333333333	5.82284152146345	0.122408188810585
Lcl-033	nsr- nis-	Lactococcus	lactis	cremoris	50	LA	0.66	0.27	7.566	14.337	6.77	3.24416666666667	7.88833333333333	5.4	1.09933655139252			0	0	0	0	0	0	0	0	0	5.75	6.19	A	14.0883333333333	6.20568508256063	11.6	6.14491176272224	0.61212845952928
Lcl-033	nsr- nis-	Lactococcus	lactis	cremoris	50	LA	0.66	0.27	7.566	14.337	6.77	3.24416666666667	7.88833333333333	5.4	1.09933655139252			0	0	0	0	0	0	0	0	0	5.75	6.19	A	14.0883333333333	5.82787176517433	11.6	5.82259495315955	0.122033272158661
Lcl-033	nsr- nis-	Lactococcus	lactis	cremoris	50	LA	0.66	0.27	7.566	14.337	6.77	3.24416666666667	7.88833333333333	5.4	1.09933655139252			0	0	0	0	0	0	0	0	0	5.75	6.19	A	14.1883333333333	6.21561315763488	11.7	6.15483983779649	0.627224482043116
Lcl-033	nsr- nis-	Lactococcus	lactis	cremoris	50	LA	0.66	0.27	7.566	14.337	6.77	3.24416666666667	7.88833333333333	5.4	1.09933655139252			0	0	0	0	0	0	0	0	0	5.75	6.19	A	14.1883333333333	5.82737891198031	11.7	5.82210209996553	0.12128386979644
Lcl-033	nsr- nis-	Lactococcus	lactis	cremoris	50	LA	0.66	0.27	7.566	14.337	6.77	3.24416666666667	7.88833333333333	5.4	1.09933655139252			0	0	0	0	0	0	0	0	0	5.75	6.19	A	14.2883333333333	6.21561315763488	11.8	6.15483983779649	0.627224482043116
Lcl-033	nsr- nis-	Lactococcus	lactis	cremoris	50	LA	0.66	0.27	7.566	14.337	6.77	3.24416666666667	7.88833333333333	5.4	1.09933655139252			0	0	0	0	0	0	0	0	0	5.75	6.19	A	14.2883333333333	5.82737891198031	11.8	5.82210209996553	0.12128386979644
Lcl-033	nsr- nis-	Lactococcus	lactis	cremoris	50	LA	0.66	0.27	7.566	14.337	6.77	3.24416666666667	7.88833333333333	5.4	1.09933655139252			0	0	0	0	0	0	0	0	0	5.75	6.19	A	14.3883333333333	6.21717504305579	11.9	6.15640172321739	0.629599389293676
Lcl-033	nsr- nis-	Lactococcus	lactis	cremoris	50	LA	0.66	0.27	7.566	14.337	6.77	3.24416666666667	7.88833333333333	5.4	1.09933655139252			0	0	0	0	0	0	0	0	0	5.75	6.19	A	14.3883333333333	5.82737891198031	11.9	5.82210209996553	0.12128386979644
Lcl-033	nsr- nis-	Lactococcus	lactis	cremoris	50	LA	0.66	0.27	7.566	14.337	6.77	3.24416666666667	7.88833333333333	5.4	1.09933655139252			0	0	0	0	0	0	0	0	0	5.75	6.19	A	14.4886666666667	6.21873692847669	12.0003333333333	6.15796360863829	0.631974296544236
Lcl-033	nsr- nis-	Lactococcus	lactis	cremoris	50	LA	0.66	0.27	7.566	14.337	6.77	3.24416666666667	7.88833333333333	5.4	1.09933655139252			0	0	0	0	0	0	0	0	0	5.75	6.19	A	14.4886666666667	5.82737891198031	12.0003333333333	5.82210209996553	0.12128386979644
Lcl-033	nsr- nis-	Lactococcus	lactis	cremoris	50	LA	0.66	0.27	7.566	14.337	6.77	3.24416666666667	7.88833333333333	5.4	1.09933655139252			0	0	0	0	0	0	0	0	0	5.75	6.19	A	14.5886666666667	6.22185715691511	12.1003333333333	6.16108383707671	0.636718724683874
Lcl-033	nsr- nis-	Lactococcus	lactis	cremoris	50	LA	0.66	0.27	7.566	14.337	6.77	3.24416666666667	7.88833333333333	5.4	1.09933655139252			0	0	0	0	0	0	0	0	0	5.75	6.19	A	14.5886666666667	5.82043038007958	12.1003333333333	5.81515356806481	0.110718358030374
Lcl-033	nsr- nis-	Lactococcus	lactis	cremoris	50	LA	0.66	0.27	7.566	14.337	6.77	3.24416666666667	7.88833333333333	5.4	1.09933655139252			0	0	0	0	0	0	0	0	0	5.75	6.19	A	14.6888333333333	6.21504931027928	12.2005	6.15427599044088	0.626367130309677
Lcl-033	nsr- nis-	Lactococcus	lactis	cremoris	50	LA	0.66	0.27	7.566	14.337	6.77	3.24416666666667	7.88833333333333	5.4	1.09933655139252			0	0	0	0	0	0	0	0	0	5.75	6.19	A	14.6888333333333	5.81323527987496	12.2005	5.80795846786018	0.0997779296123844
Lcl-033	nsr- nis-	Lactococcus	lactis	cremoris	50	LA	0.66	0.27	7.566	14.337	6.77	3.24416666666667	7.88833333333333	5.4	1.09933655139252			0	0	0	0	0	0	0	0	0	5.75	6.19	A	14.7883333333333	6.21661119570018	12.3	6.15583787586178	0.628742037560237
Lcl-033	nsr- nis-	Lactococcus	lactis	cremoris	50	LA	0.66	0.27	7.566	14.337	6.77	3.24416666666667	7.88833333333333	5.4	1.09933655139252			0	0	0	0	0	0	0	0	0	5.75	6.19	A	14.7883333333333	5.81298871157106	12.3	5.80771189955628	0.0994030129604612
Lcl-033	nsr- nis-	Lactococcus	lactis	cremoris	50	LA	0.66	0.27	7.566	14.337	6.77	3.24416666666667	7.88833333333333	5.4	1.09933655139252			0	0	0	0	0	0	0	0	0	5.75	6.19	A	14.8883333333333	6.21661119570018	12.4	6.15583787586178	0.628742037560237
Lcl-033	nsr- nis-	Lactococcus	lactis	cremoris	50	LA	0.66	0.27	7.566	14.337	6.77	3.24416666666667	7.88833333333333	5.4	1.09933655139252			0	0	0	0	0	0	0	0	0	5.75	6.19	A	14.8883333333333	5.79848093789036	12.4	5.79320412587558	0.0773433814134136
Lcl-033	nsr- nis-	Lactococcus	lactis	cremoris	50	LA	0.66	0.27	7.566	14.337	6.77	3.24416666666667	7.88833333333333	5.4	1.09933655139252			0	0	0	0	0	0	0	0	0	5.75	6.19	A	14.9883333333333	6.21843781112933	12.5	6.15766449129094	0.631519477037317
Lcl-033	nsr- nis-	Lactococcus	lactis	cremoris	50	LA	0.66	0.27	7.566	14.337	6.77	3.24416666666667	7.88833333333333	5.4	1.09933655139252			0	0	0	0	0	0	0	0	0	5.75	6.19	A	14.9883333333333	5.79823436958646	12.5	5.79295755757168	0.0769684647614904
Lcl-033	nsr- nis-	Lactococcus	lactis	cremoris	50	LA	0.66	0.27	7.566	14.337	6.77	3.24416666666667	7.88833333333333	5.4	1.09933655139252			0	0	0	0	0	0	0	0	0	5.75	6.19	A	15.0883333333333	6.22026442655849	12.6	6.15949110672009	0.634296916514397
Lcl-033	nsr- nis-	Lactococcus	lactis	cremoris	50	LA	0.66	0.27	7.566	14.337	6.77	3.24416666666667	7.88833333333333	5.4	1.09933655139252			0	0	0	0	0	0	0	0	0	5.75	6.19	A	15.0883333333333	5.79823436958646	12.6	5.79295755757168	0.0769684647614904
Lcl-033	nsr- nis-	Lactococcus	lactis	cremoris	50	LA	0.66	0.27	7.566	14.337	6.77	3.24416666666667	7.88833333333333	5.4	1.09933655139252			0	0	0	0	0	0	0	0	0	5.75	6.19	A	15.1883333333333	6.21197575122196	12.7	6.15120243138357	0.621693664770811
Lcl-033	nsr- nis-	Lactococcus	lactis	cremoris	50	LA	0.66	0.27	7.566	14.337	6.77	3.24416666666667	7.88833333333333	5.4	1.09933655139252			0	0	0	0	0	0	0	0	0	5.75	6.19	A	15.1883333333333	5.79823436958646	12.7	5.79295755757168	0.0769684647614904
Lcl-033	nsr- nis-	Lactococcus	lactis	cremoris	50	LA	0.66	0.27	7.566	14.337	6.77	3.24416666666667	7.88833333333333	5.4	1.09933655139252			0	0	0	0	0	0	0	0	0	5.75	6.19	A	15.2883333333333	6.20368707588544	12.8	6.14291375604704	0.609090413027224
Lcl-033	nsr- nis-	Lactococcus	lactis	cremoris	50	LA	0.66	0.27	7.566	14.337	6.77	3.24416666666667	7.88833333333333	5.4	1.09933655139252			0	0	0	0	0	0	0	0	0	5.75	6.19	A	15.2883333333333	5.79128583768574	12.8	5.78600902567096	0.066402952995424
Lcl-033	nsr- nis-	Lactococcus	lactis	cremoris	50	LA	0.66	0.27	7.566	14.337	6.77	3.24416666666667	7.88833333333333	5.4	1.09933655139252			0	0	0	0	0	0	0	0	0	5.75	6.19	A	15.3883333333333	6.21049492252127	12.9	6.14972160268288	0.619442007401422
Lcl-033	nsr- nis-	Lactococcus	lactis	cremoris	50	LA	0.66	0.27	7.566	14.337	6.77	3.24416666666667	7.88833333333333	5.4	1.09933655139252			0	0	0	0	0	0	0	0	0	5.75	6.19	A	15.3883333333333	5.80579361136644	12.9	5.80051679935166	0.0884625845424729
Lcl-033	nsr- nis-	Lactococcus	lactis	cremoris	50	LA	0.66	0.27	7.566	14.337	6.77	3.24416666666667	7.88833333333333	5.4	1.09933655139252			0	0	0	0	0	0	0	0	0	5.75	6.19	A	15.4883333333333	6.20710642167121	13	6.14633310183282	0.614289660673781
Lcl-033	nsr- nis-	Lactococcus	lactis	cremoris	50	LA	0.66	0.27	7.566	14.337	6.77	3.24416666666667	7.88833333333333	5.4	1.09933655139252			0	0	0	0	0	0	0	0	0	5.75	6.19	A	15.4883333333333	5.79153240598964	13	5.78625559397486	0.0667778696473472
Lcl-033	nsr- nis-	Lactococcus	lactis	cremoris	50	LA	0.66	0.27	7.566	14.337	6.77	3.24416666666667	7.88833333333333	5.4	1.09933655139252			0	0	0	0	0	0	0	0	0	5.75	6.19	A	15.5883333333333	6.20371792082116	13.1	6.14294460098276	0.609137313946141
Lcl-033	nsr- nis-	Lactococcus	lactis	cremoris	50	LA	0.66	0.27	7.566	14.337	6.77	3.24416666666667	7.88833333333333	5.4	1.09933655139252			0	0	0	0	0	0	0	0	0	5.75	6.19	A	15.5883333333333	5.79153240598964	13.1	5.78625559397486	0.0667778696473472
Lcl-033	nsr- nis-	Lactococcus	lactis	cremoris	50	LA	0.66	0.27	7.566	14.337	6.77	3.24416666666667	7.88833333333333	5.4	1.09933655139252			0	0	0	0	0	0	0	0	0	5.75	6.19	A	15.6886666666667	6.20371792082116	13.2003333333333	6.14294460098276	0.609137313946141
Lcl-033	nsr- nis-	Lactococcus	lactis	cremoris	50	LA	0.66	0.27	7.566	14.337	6.77	3.24416666666667	7.88833333333333	5.4	1.09933655139252			0	0	0	0	0	0	0	0	0	5.75	6.19	A	15.6886666666667	5.78421973251356	13.2003333333333	5.77894292049878	0.0556586665182878
Lcl-033	nsr- nis-	Lactococcus	lactis	cremoris	50	LA	0.66	0.27	7.566	14.337	6.77	3.24416666666667	7.88833333333333	5.4	1.09933655139252			0	0	0	0	0	0	0	0	0	5.75	6.19	A	15.7886666666667	6.20526421485212	13.3003333333333	6.14449089501373	0.611488513884685
Lcl-033	nsr- nis-	Lactococcus	lactis	cremoris	50	LA	0.66	0.27	7.566	14.337	6.77	3.24416666666667	7.88833333333333	5.4	1.09933655139252			0	0	0	0	0	0	0	0	0	5.75	6.19	A	15.7886666666667	5.78421973251356	13.3003333333333	5.77894292049878	0.0556586665182878
Lcl-033	nsr- nis-	Lactococcus	lactis	cremoris	50	LA	0.66	0.27	7.566	14.337	6.77	3.24416666666667	7.88833333333333	5.4	1.09933655139252			0	0	0	0	0	0	0	0	0	5.75	6.19	A	15.8883333333333	6.19689448279539	13.4	6.136121162957	0.598762012259929
Lcl-033	nsr- nis-	Lactococcus	lactis	cremoris	50	LA	0.66	0.27	7.566	14.337	6.77	3.24416666666667	7.88833333333333	5.4	1.09933655139252			0	0	0	0	0	0	0	0	0	5.75	6.19	A	15.8883333333333	5.77702463230894	13.4	5.77174782029416	0.0447182381002982
Lcl-033	nsr- nis-	Lactococcus	lactis	cremoris	50	LA	0.66	0.27	7.566	14.337	6.77	3.24416666666667	7.88833333333333	5.4	1.09933655139252			0	0	0	0	0	0	0	0	0	5.75	6.19	A	15.9883333333333	6.19845636821629	13.5	6.1376830483779	0.601136919510489
Lcl-033	nsr- nis-	Lactococcus	lactis	cremoris	50	LA	0.66	0.27	7.566	14.337	6.77	3.24416666666667	7.88833333333333	5.4	1.09933655139252			0	0	0	0	0	0	0	0	0	5.75	6.19	A	15.9883333333333	5.77702463230894	13.5	5.77174782029416	0.0447182381002982
Lcl-033	nsr- nis-	Lactococcus	lactis	cremoris	50	LA	0.66	0.27	7.566	14.337	6.77	3.24416666666667	7.88833333333333	5.4	1.09933655139252			0	0	0	0	0	0	0	0	0	5.75	6.19	A	16.0883333333333	6.20001825363719	13.6	6.1392449337988	0.603511826761049
Lcl-033	nsr- nis-	Lactococcus	lactis	cremoris	50	LA	0.66	0.27	7.566	14.337	6.77	3.24416666666667	7.88833333333333	5.4	1.09933655139252			0	0	0	0	0	0	0	0	0	5.75	6.19	A	16.0883333333333	5.76971195883286	13.6	5.76443514681808	0.0335990349712402
Lcl-033	nsr- nis-	Lactococcus	lactis	cremoris	50	LA	0.66	0.27	7.566	14.337	6.77	3.24416666666667	7.88833333333333	5.4	1.09933655139252			0	0	0	0	0	0	0	0	0	5.75	6.19	A	16.1883333333333	6.20830692897372	13.7	6.14753360913532	0.616115078504636
Lcl-033	nsr- nis-	Lactococcus	lactis	cremoris	50	LA	0.66	0.27	7.566	14.337	6.77	3.24416666666667	7.88833333333333	5.4	1.09933655139252			0	0	0	0	0	0	0	0	0	5.75	6.19	A	16.1883333333333	5.76971195883286	13.7	5.76443514681808	0.0335990349712402
Lcl-033	nsr- nis-	Lactococcus	lactis	cremoris	50	LA	0.66	0.27	7.566	14.337	6.77	3.24416666666667	7.88833333333333	5.4	1.09933655139252			0	0	0	0	0	0	0	0	0	5.75	6.19	A	16.2883333333333	6.21504931027928	13.8	6.15427599044088	0.626367130309677
Lcl-033	nsr- nis-	Lactococcus	lactis	cremoris	50	LA	0.66	0.27	7.566	14.337	6.77	3.24416666666667	7.88833333333333	5.4	1.09933655139252			0	0	0	0	0	0	0	0	0	5.75	6.19	A	16.2883333333333	5.76239928535679	13.8	5.75712247334201	0.0224798318421809
Lcl-033	nsr- nis-	Lactococcus	lactis	cremoris	50	LA	0.66	0.27	7.566	14.337	6.77	3.24416666666667	7.88833333333333	5.4	1.09933655139252			0	0	0	0	0	0	0	0	0	5.75	6.19	A	16.3883333333333	6.21661119570018	13.9	6.15583787586178	0.628742037560237
Lcl-033	nsr- nis-	Lactococcus	lactis	cremoris	50	LA	0.66	0.27	7.566	14.337	6.77	3.24416666666667	7.88833333333333	5.4	1.09933655139252			0	0	0	0	0	0	0	0	0	5.75	6.19	A	16.3883333333333	5.75584972477752	13.9	5.75057291276274	0.0125209714164813
Lcl-033	nsr- nis-	Lactococcus	lactis	cremoris	50	LA	0.66	0.27	7.566	14.337	6.77	3.24416666666667	7.88833333333333	5.4	1.09933655139252			0	0	0	0	0	0	0	0	0	5.75	6.19	A	16.4883333333333	6.21661119570018	14	6.15583787586178	0.628742037560237
Lcl-033	nsr- nis-	Lactococcus	lactis	cremoris	50	LA	0.66	0.27	7.566	14.337	6.77	3.24416666666667	7.88833333333333	5.4	1.09933655139252			0	0	0	0	0	0	0	0	0	5.75	6.19	A	16.4883333333333	5.75584972477752	14	5.75057291276274	0.0125209714164813
Lcl-033	nsr- nis-	Lactococcus	lactis	cremoris	50	LA	0.66	0.27	7.566	14.337	6.77	3.24416666666667	7.88833333333333	5.4	1.09933655139252			0	0	0	0	0	0	0	0	0	5.75	6.19	A	16.5888333333333	6.21661119570018	14.1005	6.15583787586178	0.628742037560237
Lcl-033	nsr- nis-	Lactococcus	lactis	cremoris	50	LA	0.66	0.27	7.566	14.337	6.77	3.24416666666667	7.88833333333333	5.4	1.09933655139252			0	0	0	0	0	0	0	0	0	5.75	6.19	A	16.5888333333333	5.75661283767433	14.1005	5.75133602565955	0.0136813141198411
Lcl-033	nsr- nis-	Lactococcus	lactis	cremoris	50	LA	0.66	0.27	7.566	14.337	6.77	3.24416666666667	7.88833333333333	5.4	1.09933655139252			0	0	0	0	0	0	0	0	0	5.75	6.19	A	16.6883333333333	6.20961084512017	14.2	6.14883752528177	0.618097733486162
Lcl-033	nsr- nis-	Lactococcus	lactis	cremoris	50	LA	0.66	0.27	7.566	14.337	6.77	3.24416666666667	7.88833333333333	5.4	1.09933655139252			0	0	0	0	0	0	0	0	0	5.75	6.19	A	16.6883333333333	5.75661283767433	14.2	5.75133602565955	0.0136813141198411
Lcl-033	nsr- nis-	Lactococcus	lactis	cremoris	50	LA	0.66	0.27	7.566	14.337	6.77	3.24416666666667	7.88833333333333	5.4	1.09933655139252			0	0	0	0	0	0	0	0	0	5.75	6.19	A	16.7883333333333	6.20261049454015	14.3	6.14183717470176	0.607453429412088
Lcl-033	nsr- nis-	Lactococcus	lactis	cremoris	50	LA	0.66	0.27	7.566	14.337	6.77	3.24416666666667	7.88833333333333	5.4	1.09933655139252			0	0	0	0	0	0	0	0	0	5.75	6.19	A	16.7883333333333	5.7639255111504	14.3	5.75864869913562	0.0248005172489004
Lcl-033	nsr- nis-	Lactococcus	lactis	cremoris	50	LA	0.66	0.27	7.566	14.337	6.77	3.24416666666667	7.88833333333333	5.4	1.09933655139252			0	0	0	0	0	0	0	0	0	5.75	6.19	A	16.8883333333333	6.20078863814899	14.4	6.1400153183106	0.604683226236524
Lcl-033	nsr- nis-	Lactococcus	lactis	cremoris	50	LA	0.66	0.27	7.566	14.337	6.77	3.24416666666667	7.88833333333333	5.4	1.09933655139252			0	0	0	0	0	0	0	0	0	5.75	6.19	A	16.8883333333333	5.76316239825359	14.4	5.75788558623882	0.0236401745455407
Lcl-033	nsr- nis-	Lactococcus	lactis	cremoris	50	LA	0.66	0.27	7.566	14.337	6.77	3.24416666666667	7.88833333333333	5.4	1.09933655139252			0	0	0	0	0	0	0	0	0	5.75	6.19	A	16.9883333333333	6.19378828756898	14.5	6.13301496773059	0.594038922162451
Lcl-033	nsr- nis-	Lactococcus	lactis	cremoris	50	LA	0.66	0.27	7.566	14.337	6.77	3.24416666666667	7.88833333333333	5.4	1.09933655139252			0	0	0	0	0	0	0	0	0	5.75	6.19	A	16.9883333333333	5.76316239825359	14.5	5.75788558623882	0.0236401745455407
Lcl-033	nsr- nis-	Lactococcus	lactis	cremoris	50	LA	0.66	0.27	7.566	14.337	6.77	3.24416666666667	7.88833333333333	5.4	1.09933655139252			0	0	0	0	0	0	0	0	0	5.75	6.19	A	17.0888333333333	6.19561490299814	14.6005	6.13484158315974	0.59681636163953
Lcl-033	nsr- nis-	Lactococcus	lactis	cremoris	50	LA	0.66	0.27	7.566	14.337	6.77	3.24416666666667	7.88833333333333	5.4	1.09933655139252			0	0	0	0	0	0	0	0	0	5.75	6.19	A	17.0888333333333	5.76239928535679	14.6005	5.75712247334201	0.0224798318421809
Lcl-033	nsr- nis-	Lactococcus	lactis	cremoris	50	LA	0.66	0.27	7.566	14.337	6.77	3.24416666666667	7.88833333333333	5.4	1.09933655139252			0	0	0	0	0	0	0	0	0	5.75	6.19	A	17.1883333333333	6.19742281089063	14.7	6.13664949105224	0.599565355582856
Lcl-033	nsr- nis-	Lactococcus	lactis	cremoris	50	LA	0.66	0.27	7.566	14.337	6.77	3.24416666666667	7.88833333333333	5.4	1.09933655139252			0	0	0	0	0	0	0	0	0	5.75	6.19	A	17.1883333333333	5.76896159966931	14.7	5.76368478765453	0.0324580848130533
Lcl-033	nsr- nis-	Lactococcus	lactis	cremoris	50	LA	0.66	0.27	7.566	14.337	6.77	3.24416666666667	7.88833333333333	5.4	1.09933655139252			0	0	0	0	0	0	0	0	0	5.75	6.19	A	17.2886666666667	6.19923071878312	14.8003333333333	6.13845739894473	0.602314349526182
Lcl-033	nsr- nis-	Lactococcus	lactis	cremoris	50	LA	0.66	0.27	7.566	14.337	6.77	3.24416666666667	7.88833333333333	5.4	1.09933655139252			0	0	0	0	0	0	0	0	0	5.75	6.19	A	17.2886666666667	5.76164892619323	14.8003333333333	5.75637211417845	0.021338881683994
Lcl-033	nsr- nis-	Lactococcus	lactis	cremoris	50	LA	0.66	0.27	7.566	14.337	6.77	3.24416666666667	7.88833333333333	5.4	1.09933655139252			0	0	0	0	0	0	0	0	0	5.75	6.19	A	17.3886666666667	6.19586013248677	14.9003333333333	6.13508681264837	0.597189242570998
Lcl-033	nsr- nis-	Lactococcus	lactis	cremoris	50	LA	0.66	0.27	7.566	14.337	6.77	3.24416666666667	7.88833333333333	5.4	1.09933655139252			0	0	0	0	0	0	0	0	0	5.75	6.19	A	17.3886666666667	5.7541774763692	14.9003333333333	5.74890066435442	0.00997825297087379
Lcl-033	nsr- nis-	Lactococcus	lactis	cremoris	50	LA	0.66	0.27	7.566	14.337	6.77	3.24416666666667	7.88833333333333	5.4	1.09933655139252			0	0	0	0	0	0	0	0	0	5.75	6.19	A	17.4883333333333	6.19586013248677	15	6.13508681264837	0.597189242570998
Lcl-033	nsr- nis-	Lactococcus	lactis	cremoris	50	LA	0.66	0.27	7.566	14.337	6.77	3.24416666666667	7.88833333333333	5.4	1.09933655139252			0	0	0	0	0	0	0	0	0	5.75	6.19	A	17.4883333333333	5.7541774763692	15	5.74890066435442	0.00997825297087379
Lcl-033	nsr- nis-	Lactococcus	lactis	cremoris	50	LA	0.66	0.27	7.566	14.337	6.77	3.24416666666667	7.88833333333333	5.4	1.09933655139252			0	0	0	0	0	0	0	0	0	5.75	6.19	A	17.5883333333333	6.18884107437009	15.1	6.1280677545317	0.586516492963169
Lcl-033	nsr- nis-	Lactococcus	lactis	cremoris	50	LA	0.66	0.27	7.566	14.337	6.77	3.24416666666667	7.88833333333333	5.4	1.09933655139252			0	0	0	0	0	0	0	0	0	5.75	6.19	A	17.5883333333333	5.7541774763692	15.1	5.74890066435442	0.00997825297087379
Lcl-033	nsr- nis-	Lactococcus	lactis	cremoris	50	LA	0.66	0.27	7.566	14.337	6.77	3.24416666666667	7.88833333333333	5.4	1.09933655139252			0	0	0	0	0	0	0	0	0	5.75	6.19	A	17.6886666666667	6.18884107437009	15.2003333333333	6.1280677545317	0.586516492963169
Lcl-033	nsr- nis-	Lactococcus	lactis	cremoris	50	LA	0.66	0.27	7.566	14.337	6.77	3.24416666666667	7.88833333333333	5.4	1.09933655139252			0	0	0	0	0	0	0	0	0	5.75	6.19	A	17.6886666666667	5.74761516205668	15.2003333333333	5.7423383500419	0
Lcl-033	nsr- nis-	Lactococcus	lactis	cremoris	50	LA	0.66	0.27	7.566	14.337	6.77	3.24416666666667	7.88833333333333	5.4	1.09933655139252			0	0	0	0	0	0	0	0	0	5.75	6.19	A	17.7886666666667	6.18884107437009	15.3003333333333	6.1280677545317	0.586516492963169
Lcl-033	nsr- nis-	Lactococcus	lactis	cremoris	50	LA	0.66	0.27	7.566	14.337	6.77	3.24416666666667	7.88833333333333	5.4	1.09933655139252			0	0	0	0	0	0	0	0	0	5.75	6.19	A	17.7886666666667	5.74761516205668	15.3003333333333	5.7423383500419	0
Lcl-033	nsr- nis-	Lactococcus	lactis	cremoris	50	LA	0.66	0.27	7.566	14.337	6.77	3.24416666666667	7.88833333333333	5.4	1.09933655139252			0	0	0	0	0	0	0	0	0	5.75	6.19	A	17.8883333333333	6.18838909739697	15.4	6.12761577755857	0.585829244477338
Lcl-033	nsr- nis-	Lactococcus	lactis	cremoris	50	LA	0.66	0.27	7.566	14.337	6.77	3.24416666666667	7.88833333333333	5.4	1.09933655139252			0	0	0	0	0	0	0	0	0	5.75	6.19	A	17.8883333333333	5.75508661188071	15.4	5.74980979986593	0.0113606287131216
Lcl-038	nsr+ nis-	Lactococcus	lactis	lactis	15	LA	1.98	0.27	5.689	16.881	11.19	3.46277777777778	14.4886666666667	11.1003333333333	0.782595606543999	0.0577630112324218	45	1	0	0	0	0	0	0	0	0	4.42	6.18	A	0.188333333333333	6.39558292676507	-3.2	6.34908107383917	0.974296200934598
Lcl-038	nsr+ nis-	Lactococcus	lactis	lactis	15	LA	1.98	0.27	5.689	16.881	11.19	3.46277777777778	14.4886666666667	11.1003333333333	0.782595606543999	0.0577630112324218	45	1	0	0	0	0	0	0	0	0	4.42	6.18	A	0.188333333333333	6.37889495105199	-3.2	6.37497046750273	0.987365128793592
Lcl-038	nsr+ nis-	Lactococcus	lactis	lactis	15	LA	1.98	0.27	5.689	16.881	11.19	3.46277777777778	14.4886666666667	11.1003333333333	0.782595606543999	0.0577630112324218	45	1	0	0	0	0	0	0	0	0	4.42	6.18	A	0.288333333333333	6.39477449056341	-3.1	6.34827263763751	0.973888103528557
Lcl-038	nsr+ nis-	Lactococcus	lactis	lactis	15	LA	1.98	0.27	5.689	16.881	11.19	3.46277777777778	14.4886666666667	11.1003333333333	0.782595606543999	0.0577630112324218	45	1	0	0	0	0	0	0	0	0	4.42	6.18	A	0.288333333333333	6.38265464372005	-3.1	6.37873016017079	0.989263016124957
Lcl-038	nsr+ nis-	Lactococcus	lactis	lactis	15	LA	1.98	0.27	5.689	16.881	11.19	3.46277777777778	14.4886666666667	11.1003333333333	0.782595606543999	0.0577630112324218	45	1	0	0	0	0	0	0	0	0	4.42	6.18	A	0.388333333333333	6.38992210148118	-3	6.34342024855528	0.971438624653788
Lcl-038	nsr+ nis-	Lactococcus	lactis	lactis	15	LA	1.98	0.27	5.689	16.881	11.19	3.46277777777778	14.4886666666667	11.1003333333333	0.782595606543999	0.0577630112324218	45	1	0	0	0	0	0	0	0	0	4.42	6.18	A	0.388333333333333	6.37834206872161	-3	6.37441758517235	0.987086034606058
Lcl-038	nsr+ nis-	Lactococcus	lactis	lactis	15	LA	1.98	0.27	5.689	16.881	11.19	3.46277777777778	14.4886666666667	11.1003333333333	0.782595606543999	0.0577630112324218	45	1	0	0	0	0	0	0	0	0	4.42	6.18	A	0.488833333333333	6.40608641695946	-2.8995	6.35958456403356	0.979598347342583
Lcl-038	nsr+ nis-	Lactococcus	lactis	lactis	15	LA	1.98	0.27	5.689	16.881	11.19	3.46277777777778	14.4886666666667	11.1003333333333	0.782595606543999	0.0577630112324218	45	1	0	0	0	0	0	0	0	0	4.42	6.18	A	0.488833333333333	6.38426387875965	-2.8995	6.38033939521039	0.990075355607062
Lcl-038	nsr+ nis-	Lactococcus	lactis	lactis	15	LA	1.98	0.27	5.689	16.881	11.19	3.46277777777778	14.4886666666667	11.1003333333333	0.782595606543999	0.0577630112324218	45	1	0	0	0	0	0	0	0	0	4.42	6.18	A	0.588833333333333	6.41766947949662	-2.7995	6.3711676265707204	0.985445460282019
Lcl-038	nsr+ nis-	Lactococcus	lactis	lactis	15	LA	1.98	0.27	5.689	16.881	11.19	3.46277777777778	14.4886666666667	11.1003333333333	0.782595606543999	0.0577630112324218	45	1	0	0	0	0	0	0	0	0	4.42	6.18	A	0.588833333333333	6.39018568879768	-2.7995	6.38626120524842	0.993064676608066
Lcl-038	nsr+ nis-	Lactococcus	lactis	lactis	15	LA	1.98	0.27	5.689	16.881	11.19	3.46277777777778	14.4886666666667	11.1003333333333	0.782595606543999	0.0577630112324218	45	1	0	0	0	0	0	0	0	0	4.42	6.18	A	0.688666666666667	6.42333044289182	-2.69966666666667	6.37682858996592	0.988303106281212
Lcl-038	nsr+ nis-	Lactococcus	lactis	lactis	15	LA	1.98	0.27	5.689	16.881	11.19	3.46277777777778	14.4886666666667	11.1003333333333	0.782595606543999	0.0577630112324218	45	1	0	0	0	0	0	0	0	0	4.42	6.18	A	0.688666666666667	6.39018568879768	-2.69966666666667	6.38626120524842	0.993064676608066
Lcl-038	nsr+ nis-	Lactococcus	lactis	lactis	15	LA	1.98	0.27	5.689	16.881	11.19	3.46277777777778	14.4886666666667	11.1003333333333	0.782595606543999	0.0577630112324218	45	1	0	0	0	0	0	0	0	0	4.42	6.18	A	0.788333333333333	6.43114749295721	-2.6	6.38464564003131	0.992249141661656
Lcl-038	nsr+ nis-	Lactococcus	lactis	lactis	15	LA	1.98	0.27	5.689	16.881	11.19	3.46277777777778	14.4886666666667	11.1003333333333	0.782595606543999	0.0577630112324218	45	1	0	0	0	0	0	0	0	0	4.42	6.18	A	0.788333333333333	6.40392448354926	-2.6	6.4	1
Lcl-038	nsr+ nis-	Lactococcus	lactis	lactis	15	LA	1.98	0.27	5.689	16.881	11.19	3.46277777777778	14.4886666666667	11.1003333333333	0.782595606543999	0.0577630112324218	45	1	0	0	0	0	0	0	0	0	4.42	6.18	A	0.888333333333333	6.43465206543496	-2.5	6.38815021250906	0.994018244696035
Lcl-038	nsr+ nis-	Lactococcus	lactis	lactis	15	LA	1.98	0.27	5.689	16.881	11.19	3.46277777777778	14.4886666666667	11.1003333333333	0.782595606543999	0.0577630112324218	45	1	0	0	0	0	0	0	0	0	4.42	6.18	A	0.888333333333333	6.39612177999487	-2.5	6.39219729644562	0.996061206717217
Lcl-038	nsr+ nis-	Lactococcus	lactis	lactis	15	LA	1.98	0.27	5.689	16.881	11.19	3.46277777777778	14.4886666666667	11.1003333333333	0.782595606543999	0.0577630112324218	45	1	0	0	0	0	0	0	0	0	4.42	6.18	A	0.988333333333333	6.43007081249384	-2.4	6.38356895956794	0.991705634946677
Lcl-038	nsr+ nis-	Lactococcus	lactis	lactis	15	LA	1.98	0.27	5.689	16.881	11.19	3.46277777777778	14.4886666666667	11.1003333333333	0.782595606543999	0.0577630112324218	45	1	0	0	0	0	0	0	0	0	4.42	6.18	A	0.988333333333333	6.38831907644049	-2.4	6.38439459289123	0.992122413434434
Lcl-038	nsr+ nis-	Lactococcus	lactis	lactis	15	LA	1.98	0.27	5.689	16.881	11.19	3.46277777777778	14.4886666666667	11.1003333333333	0.782595606543999	0.0577630112324218	45	1	0	0	0	0	0	0	0	0	4.42	6.18	A	1.08833333333333	6.4246796169635	-2.3	6.3781777640376	0.98898416736905
Lcl-038	nsr+ nis-	Lactococcus	lactis	lactis	15	LA	1.98	0.27	5.689	16.881	11.19	3.46277777777778	14.4886666666667	11.1003333333333	0.782595606543999	0.0577630112324218	45	1	0	0	0	0	0	0	0	0	4.42	6.18	A	1.08833333333333	6.38266612026798	-2.3	6.37874163671872	0.98926880946948
Lcl-038	nsr+ nis-	Lactococcus	lactis	lactis	15	LA	1.98	0.27	5.689	16.881	11.19	3.46277777777778	14.4886666666667	11.1003333333333	0.782595606543999	0.0577630112324218	45	1	0	0	0	0	0	0	0	0	4.42	6.18	A	1.18866666666667	6.41713203051571	-2.19966666666667	6.37063017758981	0.985174156826609
Lcl-038	nsr+ nis-	Lactococcus	lactis	lactis	15	LA	1.98	0.27	5.689	16.881	11.19	3.46277777777778	14.4886666666667	11.1003333333333	0.782595606543999	0.0577630112324218	45	1	0	0	0	0	0	0	0	0	4.42	6.18	A	1.18866666666667	6.37486341671359	-2.19966666666667	6.37093893316434	0.985330016186697
Lcl-038	nsr+ nis-	Lactococcus	lactis	lactis	15	LA	1.98	0.27	5.689	16.881	11.19	3.46277777777778	14.4886666666667	11.1003333333333	0.782595606543999	0.0577630112324218	45	1	0	0	0	0	0	0	0	0	4.42	6.18	A	1.28833333333333	6.42278687217825	-2.1	6.37628501925235	0.988028712584155
Lcl-038	nsr+ nis-	Lactococcus	lactis	lactis	15	LA	1.98	0.27	5.689	16.881	11.19	3.46277777777778	14.4886666666667	11.1003333333333	0.782595606543999	0.0577630112324218	45	1	0	0	0	0	0	0	0	0	4.42	6.18	A	1.28833333333333	6.36139347582754	-2.1	6.35746899227828	0.978530409830813
Lcl-038	nsr+ nis-	Lactococcus	lactis	lactis	15	LA	1.98	0.27	5.689	16.881	11.19	3.46277777777778	14.4886666666667	11.1003333333333	0.782595606543999	0.0577630112324218	45	1	0	0	0	0	0	0	0	0	4.42	6.18	A	1.38833333333333	6.4173956766479	-2	6.370893823722	0.985307245006528
Lcl-038	nsr+ nis-	Lactococcus	lactis	lactis	15	LA	1.98	0.27	5.689	16.881	11.19	3.46277777777778	14.4886666666667	11.1003333333333	0.782595606543999	0.0577630112324218	45	1	0	0	0	0	0	0	0	0	4.42	6.18	A	1.38833333333333	6.36139347582754	-2	6.35746899227828	0.978530409830813
Lcl-038	nsr+ nis-	Lactococcus	lactis	lactis	15	LA	1.98	0.27	5.689	16.881	11.19	3.46277777777778	14.4886666666667	11.1003333333333	0.782595606543999	0.0577630112324218	45	1	0	0	0	0	0	0	0	0	4.42	6.18	A	1.48833333333333	6.41200448111756	-1.9	6.36550262819166	0.982585777428902
Lcl-038	nsr+ nis-	Lactococcus	lactis	lactis	15	LA	1.98	0.27	5.689	16.881	11.19	3.46277777777778	14.4886666666667	11.1003333333333	0.782595606543999	0.0577630112324218	45	1	0	0	0	0	0	0	0	0	4.42	6.18	A	1.48833333333333	6.36919617938192	-1.9	6.36527169583267	0.982469203113596
Lcl-038	nsr+ nis-	Lactococcus	lactis	lactis	15	LA	1.98	0.27	5.689	16.881	11.19	3.46277777777778	14.4886666666667	11.1003333333333	0.782595606543999	0.0577630112324218	45	1	0	0	0	0	0	0	0	0	4.42	6.18	A	1.58866666666667	6.41200448111756	-1.79966666666667	6.36550262819166	0.982585777428902
Lcl-038	nsr+ nis-	Lactococcus	lactis	lactis	15	LA	1.98	0.27	5.689	16.881	11.19	3.46277777777778	14.4886666666667	11.1003333333333	0.782595606543999	0.0577630112324218	45	1	0	0	0	0	0	0	0	0	4.42	6.18	A	1.58866666666667	6.36704643200005	-1.79966666666667	6.36312194845079	0.981384013795767
Lcl-038	nsr+ nis-	Lactococcus	lactis	lactis	15	LA	1.98	0.27	5.689	16.881	11.19	3.46277777777778	14.4886666666667	11.1003333333333	0.782595606543999	0.0577630112324218	45	1	0	0	0	0	0	0	0	0	4.42	6.18	A	1.68883333333333	6.4173956766479	-1.6995	6.370893823722	0.985307245006528
Lcl-038	nsr+ nis-	Lactococcus	lactis	lactis	15	LA	1.98	0.27	5.689	16.881	11.19	3.46277777777778	14.4886666666667	11.1003333333333	0.782595606543999	0.0577630112324218	45	1	0	0	0	0	0	0	0	0	4.42	6.18	A	1.68883333333333	6.36114991287854	-1.6995	6.35722542932928	0.97840745961224
Lcl-038	nsr+ nis-	Lactococcus	lactis	lactis	15	LA	1.98	0.27	5.689	16.881	11.19	3.46277777777778	14.4886666666667	11.1003333333333	0.782595606543999	0.0577630112324218	45	1	0	0	0	0	0	0	0	0	4.42	6.18	A	1.78833333333333	6.41497359481375	-1.6	6.36847174188785	0.984084581657572
Lcl-038	nsr+ nis-	Lactococcus	lactis	lactis	15	LA	1.98	0.27	5.689	16.881	11.19	3.46277777777778	14.4886666666667	11.1003333333333	0.782595606543999	0.0577630112324218	45	1	0	0	0	0	0	0	0	0	4.42	6.18	A	1.78833333333333	6.35497707412462	-1.6	6.35105259057536	0.97529141968452
Lcl-038	nsr+ nis-	Lactococcus	lactis	lactis	15	LA	1.98	0.27	5.689	16.881	11.19	3.46277777777778	14.4886666666667	11.1003333333333	0.782595606543999	0.0577630112324218	45	1	0	0	0	0	0	0	0	0	4.42	6.18	A	1.88866666666667	6.42817602292407	-1.49966666666667	6.38167416999817	0.990749147957559
Lcl-038	nsr+ nis-	Lactococcus	lactis	lactis	15	LA	1.98	0.27	5.689	16.881	11.19	3.46277777777778	14.4886666666667	11.1003333333333	0.782595606543999	0.0577630112324218	45	1	0	0	0	0	0	0	0	0	4.42	6.18	A	1.88866666666667	6.34908055500311	-1.49966666666667	6.34515607145385	0.972314865500994
Lcl-038	nsr+ nis-	Lactococcus	lactis	lactis	15	LA	1.98	0.27	5.689	16.881	11.19	3.46277777777778	14.4886666666667	11.1003333333333	0.782595606543999	0.0577630112324218	45	1	0	0	0	0	0	0	0	0	4.42	6.18	A	1.98833333333333	6.42602082640979	-1.4	6.37951897348389	0.989661207925706
Lcl-038	nsr+ nis-	Lactococcus	lactis	lactis	15	LA	1.98	0.27	5.689	16.881	11.19	3.46277777777778	14.4886666666667	11.1003333333333	0.782595606543999	0.0577630112324218	45	1	0	0	0	0	0	0	0	0	4.42	6.18	A	1.98833333333333	6.3434275988306	-1.4	6.33950311528134	0.96946126153604
Lcl-038	nsr+ nis-	Lactococcus	lactis	lactis	15	LA	1.98	0.27	5.689	16.881	11.19	3.46277777777778	14.4886666666667	11.1003333333333	0.782595606543999	0.0577630112324218	45	1	0	0	0	0	0	0	0	0	4.42	6.18	A	2.08866666666667	6.43383791174185	-1.29966666666667	6.38733605881595	0.993607261108712
Lcl-038	nsr+ nis-	Lactococcus	lactis	lactis	15	LA	1.98	0.27	5.689	16.881	11.19	3.46277777777778	14.4886666666667	11.1003333333333	0.782595606543999	0.0577630112324218	45	1	0	0	0	0	0	0	0	0	4.42	6.18	A	2.08866666666667	6.33753107970908	-1.29966666666667	6.33360659615982	0.966484707352512
Lcl-038	nsr+ nis-	Lactococcus	lactis	lactis	15	LA	1.98	0.27	5.689	16.881	11.19	3.46277777777778	14.4886666666667	11.1003333333333	0.782595606543999	0.0577630112324218	45	1	0	0	0	0	0	0	0	0	4.42	6.18	A	2.18833333333333	6.43410748924542	-1.2	6.38760563631952	0.993743343436184
Lcl-038	nsr+ nis-	Lactococcus	lactis	lactis	15	LA	1.98	0.27	5.689	16.881	11.19	3.46277777777778	14.4886666666667	11.1003333333333	0.782595606543999	0.0577630112324218	45	1	0	0	0	0	0	0	0	0	4.42	6.18	A	2.18833333333333	6.33940450745855	-1.2	6.33548002390929	0.967430410926148
Lcl-038	nsr+ nis-	Lactococcus	lactis	lactis	15	LA	1.98	0.27	5.689	16.881	11.19	3.46277777777778	14.4886666666667	11.1003333333333	0.782595606543999	0.0577630112324218	45	1	0	0	0	0	0	0	0	0	4.42	6.18	A	2.28833333333333	6.42898791600317	-1.1	6.38248606307727	0.991158990390251
Lcl-038	nsr+ nis-	Lactococcus	lactis	lactis	15	LA	1.98	0.27	5.689	16.881	11.19	3.46277777777778	14.4886666666667	11.1003333333333	0.782595606543999	0.0577630112324218	45	1	0	0	0	0	0	0	0	0	4.42	6.18	A	2.28833333333333	6.33753107970908	-1.1	6.33360659615982	0.966484707352512
Lcl-038	nsr+ nis-	Lactococcus	lactis	lactis	15	LA	1.98	0.27	5.689	16.881	11.19	3.46277777777778	14.4886666666667	11.1003333333333	0.782595606543999	0.0577630112324218	45	1	0	0	0	0	0	0	0	0	4.42	6.18	A	2.38866666666667	6.42144626092677	-0.999666666666667	6.37494440800087	0.987351973995362
Lcl-038	nsr+ nis-	Lactococcus	lactis	lactis	15	LA	1.98	0.27	5.689	16.881	11.19	3.46277777777778	14.4886666666667	11.1003333333333	0.782595606543999	0.0577630112324218	45	1	0	0	0	0	0	0	0	0	4.42	6.18	A	2.38866666666667	6.33753107970908	-0.999666666666667	6.33360659615982	0.966484707352512
Lcl-038	nsr+ nis-	Lactococcus	lactis	lactis	15	LA	1.98	0.27	5.689	16.881	11.19	3.46277777777778	14.4886666666667	11.1003333333333	0.782595606543999	0.0577630112324218	45	1	0	0	0	0	0	0	0	0	4.42	6.18	A	2.48833333333333	6.42926223047496	-0.9	6.38276037754906	0.991297463932314
Lcl-038	nsr+ nis-	Lactococcus	lactis	lactis	15	LA	1.98	0.27	5.689	16.881	11.19	3.46277777777778	14.4886666666667	11.1003333333333	0.782595606543999	0.0577630112324218	45	1	0	0	0	0	0	0	0	0	4.42	6.18	A	2.48833333333333	6.32948481320569	-0.9	6.32556032965643	0.962422963851157
Lcl-038	nsr+ nis-	Lactococcus	lactis	lactis	15	LA	1.98	0.27	5.689	16.881	11.19	3.46277777777778	14.4886666666667	11.1003333333333	0.782595606543999	0.0577630112324218	45	1	0	0	0	0	0	0	0	0	4.42	6.18	A	2.58866666666667	6.42710591817682	-0.799666666666667	6.38060406525092	0.990208960654407
Lcl-038	nsr+ nis-	Lactococcus	lactis	lactis	15	LA	1.98	0.27	5.689	16.881	11.19	3.46277777777778	14.4886666666667	11.1003333333333	0.782595606543999	0.0577630112324218	45	1	0	0	0	0	0	0	0	0	4.42	6.18	A	2.58866666666667	6.33135824095516	-0.799666666666667	6.32743375740591	0.963368667424793
Lcl-038	nsr+ nis-	Lactococcus	lactis	lactis	15	LA	1.98	0.27	5.689	16.881	11.19	3.46277777777778	14.4886666666667	11.1003333333333	0.782595606543999	0.0577630112324218	45	1	0	0	0	0	0	0	0	0	4.42	6.18	A	2.68833333333333	6.42710591817682	-0.7	6.38060406525092	0.990208960654407
Lcl-038	nsr+ nis-	Lactococcus	lactis	lactis	15	LA	1.98	0.27	5.689	16.881	11.19	3.46277777777778	14.4886666666667	11.1003333333333	0.782595606543999	0.0577630112324218	45	1	0	0	0	0	0	0	0	0	4.42	6.18	A	2.68833333333333	6.32149130197729	-0.7	6.31756681842804	0.958387851135056
Lcl-038	nsr+ nis-	Lactococcus	lactis	lactis	15	LA	1.98	0.27	5.689	16.881	11.19	3.46277777777778	14.4886666666667	11.1003333333333	0.782595606543999	0.0577630112324218	45	1	0	0	0	0	0	0	0	0	4.42	6.18	A	2.78833333333333	6.42710591817682	-0.6	6.38060406525092	0.990208960654407
Lcl-038	nsr+ nis-	Lactococcus	lactis	lactis	15	LA	1.98	0.27	5.689	16.881	11.19	3.46277777777778	14.4886666666667	11.1003333333333	0.782595606543999	0.0577630112324218	45	1	0	0	0	0	0	0	0	0	4.42	6.18	A	2.78833333333333	6.31535730195405	-0.6	6.3114328184048	0.95529141694148
Lcl-038	nsr+ nis-	Lactococcus	lactis	lactis	15	LA	1.98	0.27	5.689	16.881	11.19	3.46277777777778	14.4886666666667	11.1003333333333	0.782595606543999	0.0577630112324218	45	1	0	0	0	0	0	0	0	0	4.42	6.18	A	2.88833333333333	6.42710591817682	-0.5	6.38060406525092	0.990208960654407
Lcl-038	nsr+ nis-	Lactococcus	lactis	lactis	15	LA	1.98	0.27	5.689	16.881	11.19	3.46277777777778	14.4886666666667	11.1003333333333	0.782595606543999	0.0577630112324218	45	1	0	0	0	0	0	0	0	0	4.42	6.18	A	2.88833333333333	6.30101798168081	-0.5	6.29709349813156	0.948052949149099
Lcl-038	nsr+ nis-	Lactococcus	lactis	lactis	15	LA	1.98	0.27	5.689	16.881	11.19	3.46277777777778	14.4886666666667	11.1003333333333	0.782595606543999	0.0577630112324218	45	1	0	0	0	0	0	0	0	0	4.42	6.18	A	2.98866666666667	6.42710591817682	-0.399666666666667	6.38060406525092	0.990208960654407
Lcl-038	nsr+ nis-	Lactococcus	lactis	lactis	15	LA	1.98	0.27	5.689	16.881	11.19	3.46277777777778	14.4886666666667	11.1003333333333	0.782595606543999	0.0577630112324218	45	1	0	0	0	0	0	0	0	0	4.42	6.18	A	2.98866666666667	6.28852455370132	-0.399666666666667	6.28460007015206	0.941746285072783
Lcl-038	nsr+ nis-	Lactococcus	lactis	lactis	15	LA	1.98	0.27	5.689	16.881	11.19	3.46277777777778	14.4886666666667	11.1003333333333	0.782595606543999	0.0577630112324218	45	1	0	0	0	0	0	0	0	0	4.42	6.18	A	3.08866666666667	6.4214451451429	-0.299666666666667	6.374943292217	0.987351410749308
Lcl-038	nsr+ nis-	Lactococcus	lactis	lactis	15	LA	1.98	0.27	5.689	16.881	11.19	3.46277777777778	14.4886666666667	11.1003333333333	0.782595606543999	0.0577630112324218	45	1	0	0	0	0	0	0	0	0	4.42	6.18	A	3.08866666666667	6.27415769797234	-0.299666666666667	6.27023321442309	0.934493917422831
Lcl-038	nsr+ nis-	Lactococcus	lactis	lactis	15	LA	1.98	0.27	5.689	16.881	11.19	3.46277777777778	14.4886666666667	11.1003333333333	0.782595606543999	0.0577630112324218	45	1	0	0	0	0	0	0	0	0	4.42	6.18	A	3.18833333333333	6.42898680021931	-0.2	6.38248494729341	0.991158427144197
Lcl-038	nsr+ nis-	Lactococcus	lactis	lactis	15	LA	1.98	0.27	5.689	16.881	11.19	3.46277777777778	14.4886666666667	11.1003333333333	0.782595606543999	0.0577630112324218	45	1	0	0	0	0	0	0	0	0	4.42	6.18	A	3.18833333333333	6.26334718103388	-0.2	6.25942269748462	0.929036784365826
Lcl-038	nsr+ nis-	Lactococcus	lactis	lactis	15	LA	1.98	0.27	5.689	16.881	11.19	3.46277777777778	14.4886666666667	11.1003333333333	0.782595606543999	0.0577630112324218	45	1	0	0	0	0	0	0	0	0	4.42	6.18	A	3.28833333333333	6.42898680021931	-0.1	6.38248494729341	0.991158427144197
Lcl-038	nsr+ nis-	Lactococcus	lactis	lactis	15	LA	1.98	0.27	5.689	16.881	11.19	3.46277777777778	14.4886666666667	11.1003333333333	0.782595606543999	0.0577630112324218	45	1	0	0	0	0	0	0	0	0	4.42	6.18	A	3.28833333333333	6.24260615284057	-0.1	6.23868166929132	0.918566743827135
Lcl-038	nsr+ nis-	Lactococcus	lactis	lactis	15	LA	1.98	0.27	5.689	16.881	11.19	3.46277777777778	14.4886666666667	11.1003333333333	0.782595606543999	0.0577630112324218	45	1	0	0	0	0	0	0	0	0	4.42	6.18	A	3.38833333333333	6.43652845529571	0	6.39002660236981	0.994965443539087
Lcl-038	nsr+ nis-	Lactococcus	lactis	lactis	15	LA	1.98	0.27	5.689	16.881	11.19	3.46277777777778	14.4886666666667	11.1003333333333	0.782595606543999	0.0577630112324218	45	1	0	0	0	0	0	0	0	0	4.42	6.18	A	3.38833333333333	6.23162520672418	0	6.22770072317492	0.913023578371677
Lcl-038	nsr+ nis-	Lactococcus	lactis	lactis	15	LA	1.98	0.27	5.689	16.881	11.19	3.46277777777778	14.4886666666667	11.1003333333333	0.782595606543999	0.0577630112324218	45	1	0	0	0	0	0	0	0	0	4.42	6.18	A	3.48833333333333	6.43868476759385	0.1	6.39218291466795	0.996053946816994
Lcl-038	nsr+ nis-	Lactococcus	lactis	lactis	15	LA	1.98	0.27	5.689	16.881	11.19	3.46277777777778	14.4886666666667	11.1003333333333	0.782595606543999	0.0577630112324218	45	1	0	0	0	0	0	0	0	0	4.42	6.18	A	3.48833333333333	6.20417537077042	0.1	6.20025088722116	0.899166941538741
Lcl-038	nsr+ nis-	Lactococcus	lactis	lactis	15	LA	1.98	0.27	5.689	16.881	11.19	3.46277777777778	14.4886666666667	11.1003333333333	0.782595606543999	0.0577630112324218	45	1	0	0	0	0	0	0	0	0	4.42	6.18	A	3.58833333333333	6.4465018529259	0.2	6.4	1
Lcl-038	nsr+ nis-	Lactococcus	lactis	lactis	15	LA	1.98	0.27	5.689	16.881	11.19	3.46277777777778	14.4886666666667	11.1003333333333	0.782595606543999	0.0577630112324218	45	1	0	0	0	0	0	0	0	0	4.42	6.18	A	3.58833333333333	6.1711690192714	0.2	6.16724453572214	0.882505383827699
Lcl-038	nsr+ nis-	Lactococcus	lactis	lactis	15	LA	1.98	0.27	5.689	16.881	11.19	3.46277777777778	14.4886666666667	11.1003333333333	0.782595606543999	0.0577630112324218	45	1	0	0	0	0	0	0	0	0	4.42	6.18	A	3.68833333333333	6.44111651014763	0.3	6.39461465722173	0.997281486883018
Lcl-038	nsr+ nis-	Lactococcus	lactis	lactis	15	LA	1.98	0.27	5.689	16.881	11.19	3.46277777777778	14.4886666666667	11.1003333333333	0.782595606543999	0.0577630112324218	45	1	0	0	0	0	0	0	0	0	4.42	6.18	A	3.68833333333333	6.14447326795974	0.3	6.14054878441048	0.869029407813445
Lcl-038	nsr+ nis-	Lactococcus	lactis	lactis	15	LA	1.98	0.27	5.689	16.881	11.19	3.46277777777778	14.4886666666667	11.1003333333333	0.782595606543999	0.0577630112324218	45	1	0	0	0	0	0	0	0	0	4.42	6.18	A	3.78833333333333	6.43330054059944	0.4	6.38679868767354	0.993335996946066
Lcl-038	nsr+ nis-	Lactococcus	lactis	lactis	15	LA	1.98	0.27	5.689	16.881	11.19	3.46277777777778	14.4886666666667	11.1003333333333	0.782595606543999	0.0577630112324218	45	1	0	0	0	0	0	0	0	0	4.42	6.18	A	3.78833333333333	6.11834523814761	0.4	6.11442075459836	0.8558400167775
Lcl-038	nsr+ nis-	Lactococcus	lactis	lactis	15	LA	1.98	0.27	5.689	16.881	11.19	3.46277777777778	14.4886666666667	11.1003333333333	0.782595606543999	0.0577630112324218	45	1	0	0	0	0	0	0	0	0	4.42	6.18	A	3.88833333333333	6.42791519782118	0.5	6.38141334489528	0.990617483829084
Lcl-038	nsr+ nis-	Lactococcus	lactis	lactis	15	LA	1.98	0.27	5.689	16.881	11.19	3.46277777777778	14.4886666666667	11.1003333333333	0.782595606543999	0.0577630112324218	45	1	0	0	0	0	0	0	0	0	4.42	6.18	A	3.88833333333333	6.07734023317787	0.5	6.07341574962861	0.835140750553993
Lcl-038	nsr+ nis-	Lactococcus	lactis	lactis	15	LA	1.98	0.27	5.689	16.881	11.19	3.46277777777778	14.4886666666667	11.1003333333333	0.782595606543999	0.0577630112324218	45	1	0	0	0	0	0	0	0	0	4.42	6.18	A	3.98833333333333	6.42575888552304	0.6	6.37925703259714	0.989528980551176
Lcl-038	nsr+ nis-	Lactococcus	lactis	lactis	15	LA	1.98	0.27	5.689	16.881	11.19	3.46277777777778	14.4886666666667	11.1003333333333	0.782595606543999	0.0577630112324218	45	1	0	0	0	0	0	0	0	0	4.42	6.18	A	3.98833333333333	6.04411915989802	0.6	6.04019467634876	0.818370801603672
Lcl-038	nsr+ nis-	Lactococcus	lactis	lactis	15	LA	1.98	0.27	5.689	16.881	11.19	3.46277777777778	14.4886666666667	11.1003333333333	0.782595606543999	0.0577630112324218	45	1	0	0	0	0	0	0	0	0	4.42	6.18	A	4.08833333333333	6.41578660367671	0.7	6.36928475075081	0.984494987336316
Lcl-038	nsr+ nis-	Lactococcus	lactis	lactis	15	LA	1.98	0.27	5.689	16.881	11.19	3.46277777777778	14.4886666666667	11.1003333333333	0.782595606543999	0.0577630112324218	45	1	0	0	0	0	0	0	0	0	4.42	6.18	A	4.08833333333333	6.01037025639134	0.7	6.00644577284208	0.80133440473086
Lcl-038	nsr+ nis-	Lactococcus	lactis	lactis	15	LA	1.98	0.27	5.689	16.881	11.19	3.46277777777778	14.4886666666667	11.1003333333333	0.782595606543999	0.0577630112324218	45	1	0	0	0	0	0	0	0	0	4.42	6.18	A	4.18866666666667	6.41363029137858	0.800333333333333	6.36712843845268	0.983406484058409
Lcl-038	nsr+ nis-	Lactococcus	lactis	lactis	15	LA	1.98	0.27	5.689	16.881	11.19	3.46277777777778	14.4886666666667	11.1003333333333	0.782595606543999	0.0577630112324218	45	1	0	0	0	0	0	0	0	0	4.42	6.18	A	4.18866666666667	5.97029940441372	0.800333333333333	5.96637492086447	0.781106697564396
Lcl-038	nsr+ nis-	Lactococcus	lactis	lactis	15	LA	1.98	0.27	5.689	16.881	11.19	3.46277777777778	14.4886666666667	11.1003333333333	0.782595606543999	0.0577630112324218	45	1	0	0	0	0	0	0	0	0	4.42	6.18	A	4.28866666666667	6.4236025732249	0.900333333333333	6.377100720299	0.988440477273269
Lcl-038	nsr+ nis-	Lactococcus	lactis	lactis	15	LA	1.98	0.27	5.689	16.881	11.19	3.46277777777778	14.4886666666667	11.1003333333333	0.782595606543999	0.0577630112324218	45	1	0	0	0	0	0	0	0	0	4.42	6.18	A	4.28866666666667	5.92527453079519	0.900333333333333	5.92135004724593	0.758378207556957
Lcl-038	nsr+ nis-	Lactococcus	lactis	lactis	15	LA	1.98	0.27	5.689	16.881	11.19	3.46277777777778	14.4886666666667	11.1003333333333	0.782595606543999	0.0577630112324218	45	1	0	0	0	0	0	0	0	0	4.42	6.18	A	4.38866666666667	6.4236025732249	1.00033333333333	6.377100720299	0.988440477273269
Lcl-038	nsr+ nis-	Lactococcus	lactis	lactis	15	LA	1.98	0.27	5.689	16.881	11.19	3.46277777777778	14.4886666666667	11.1003333333333	0.782595606543999	0.0577630112324218	45	1	0	0	0	0	0	0	0	0	4.42	6.18	A	4.38866666666667	5.89332602147137	1.00033333333333	5.88940153792211	0.742250647020726
Lcl-038	nsr+ nis-	Lactococcus	lactis	lactis	15	LA	1.98	0.27	5.689	16.881	11.19	3.46277777777778	14.4886666666667	11.1003333333333	0.782595606543999	0.0577630112324218	45	1	0	0	0	0	0	0	0	0	4.42	6.18	A	4.48833333333333	6.42575888552304	1.1	6.37925703259714	0.989528980551176
Lcl-038	nsr+ nis-	Lactococcus	lactis	lactis	15	LA	1.98	0.27	5.689	16.881	11.19	3.46277777777778	14.4886666666667	11.1003333333333	0.782595606543999	0.0577630112324218	45	1	0	0	0	0	0	0	0	0	4.42	6.18	A	4.48833333333333	5.86154179850529	1.1	5.85761731495604	0.726206017996355
Lcl-038	nsr+ nis-	Lactococcus	lactis	lactis	15	LA	1.98	0.27	5.689	16.881	11.19	3.46277777777778	14.4886666666667	11.1003333333333	0.782595606543999	0.0577630112324218	45	1	0	0	0	0	0	0	0	0	4.42	6.18	A	4.58833333333333	6.43573116736937	1.2	6.38922931444347	0.994562973766036
Lcl-038	nsr+ nis-	Lactococcus	lactis	lactis	15	LA	1.98	0.27	5.689	16.881	11.19	3.46277777777778	14.4886666666667	11.1003333333333	0.782595606543999	0.0577630112324218	45	1	0	0	0	0	0	0	0	0	4.42	6.18	A	4.58833333333333	5.82398582112144	1.2	5.82006133757218	0.707247815827474
Lcl-038	nsr+ nis-	Lactococcus	lactis	lactis	15	LA	1.98	0.27	5.689	16.881	11.19	3.46277777777778	14.4886666666667	11.1003333333333	0.782595606543999	0.0577630112324218	45	1	0	0	0	0	0	0	0	0	4.42	6.18	A	4.68866666666667	6.43788747966751	1.30033333333333	6.39138562674161	0.995651477043943
Lcl-038	nsr+ nis-	Lactococcus	lactis	lactis	15	LA	1.98	0.27	5.689	16.881	11.19	3.46277777777778	14.4886666666667	11.1003333333333	0.782595606543999	0.0577630112324218	45	1	0	0	0	0	0	0	0	0	4.42	6.18	A	4.68866666666667	5.78574784935493	1.30033333333333	5.78182336580567	0.687945343896891
Lcl-038	nsr+ nis-	Lactococcus	lactis	lactis	15	LA	1.98	0.27	5.689	16.881	11.19	3.46277777777778	14.4886666666667	11.1003333333333	0.782595606543999	0.0577630112324218	45	1	0	0	0	0	0	0	0	0	4.42	6.18	A	4.7883333333333304	6.43788747966751	1.4	6.39138562674161	0.995651477043943
Lcl-038	nsr+ nis-	Lactococcus	lactis	lactis	15	LA	1.98	0.27	5.689	16.881	11.19	3.46277777777778	14.4886666666667	11.1003333333333	0.782595606543999	0.0577630112324218	45	1	0	0	0	0	0	0	0	0	4.42	6.18	A	4.7883333333333304	5.754928983176	1.4	5.75100449962674	0.672388025559406
Lcl-038	nsr+ nis-	Lactococcus	lactis	lactis	15	LA	1.98	0.27	5.689	16.881	11.19	3.46277777777778	14.4886666666667	11.1003333333333	0.782595606543999	0.0577630112324218	45	1	0	0	0	0	0	0	0	0	4.42	6.18	A	4.88833333333333	6.43788747966751	1.5	6.39138562674161	0.995651477043943
Lcl-038	nsr+ nis-	Lactococcus	lactis	lactis	15	LA	1.98	0.27	5.689	16.881	11.19	3.46277777777778	14.4886666666667	11.1003333333333	0.782595606543999	0.0577630112324218	45	1	0	0	0	0	0	0	0	0	4.42	6.18	A	4.88833333333333	5.71728678652403	1.5	5.71336230297478	0.653386300030743
Lcl-038	nsr+ nis-	Lactococcus	lactis	lactis	15	LA	1.98	0.27	5.689	16.881	11.19	3.46277777777778	14.4886666666667	11.1003333333333	0.782595606543999	0.0577630112324218	45	1	0	0	0	0	0	0	0	0	4.42	6.18	A	4.98833333333333	6.43788747966751	1.6	6.39138562674161	0.995651477043943
Lcl-038	nsr+ nis-	Lactococcus	lactis	lactis	15	LA	1.98	0.27	5.689	16.881	11.19	3.46277777777778	14.4886666666667	11.1003333333333	0.782595606543999	0.0577630112324218	45	1	0	0	0	0	0	0	0	0	4.42	6.18	A	4.98833333333333	5.68015477915317	1.6	5.67623029560391	0.6346421173011
Lcl-038	nsr+ nis-	Lactococcus	lactis	lactis	15	LA	1.98	0.27	5.689	16.881	11.19	3.46277777777778	14.4886666666667	11.1003333333333	0.782595606543999	0.0577630112324218	45	1	0	0	0	0	0	0	0	0	4.42	6.18	A	5.08866666666667	6.43788747966751	1.70033333333333	6.39138562674161	0.995651477043943
Lcl-038	nsr+ nis-	Lactococcus	lactis	lactis	15	LA	1.98	0.27	5.689	16.881	11.19	3.46277777777778	14.4886666666667	11.1003333333333	0.782595606543999	0.0577630112324218	45	1	0	0	0	0	0	0	0	0	4.42	6.18	A	5.08866666666667	5.64734238197036	1.70033333333333	5.6434178984211	0.618078467443734
Lcl-038	nsr+ nis-	Lactococcus	lactis	lactis	15	LA	1.98	0.27	5.689	16.881	11.19	3.46277777777778	14.4886666666667	11.1003333333333	0.782595606543999	0.0577630112324218	45	1	0	0	0	0	0	0	0	0	4.42	6.18	A	5.18833333333333	6.43573116736937	1.8	6.38922931444347	0.994562973766036
Lcl-038	nsr+ nis-	Lactococcus	lactis	lactis	15	LA	1.98	0.27	5.689	16.881	11.19	3.46277777777778	14.4886666666667	11.1003333333333	0.782595606543999	0.0577630112324218	45	1	0	0	0	0	0	0	0	0	4.42	6.18	A	5.18833333333333	5.61088800507942	1.8	5.60696352153016	0.599676351584112
Lcl-038	nsr+ nis-	Lactococcus	lactis	lactis	15	LA	1.98	0.27	5.689	16.881	11.19	3.46277777777778	14.4886666666667	11.1003333333333	0.782595606543999	0.0577630112324218	45	1	0	0	0	0	0	0	0	0	4.42	6.18	A	5.2883333333333304	6.43357485507123	1.9	6.38707300214533	0.993474470488129
Lcl-038	nsr+ nis-	Lactococcus	lactis	lactis	15	LA	1.98	0.27	5.689	16.881	11.19	3.46277777777778	14.4886666666667	11.1003333333333	0.782595606543999	0.0577630112324218	45	1	0	0	0	0	0	0	0	0	4.42	6.18	A	5.2883333333333304	5.57374110596721	1.9	5.56981662241795	0.580924651525334
Lcl-038	nsr+ nis-	Lactococcus	lactis	lactis	15	LA	1.98	0.27	5.689	16.881	11.19	3.46277777777778	14.4886666666667	11.1003333333333	0.782595606543999	0.0577630112324218	45	1	0	0	0	0	0	0	0	0	4.42	6.18	A	5.38833333333333	6.43357485507123	2	6.38707300214533	0.993474470488129
Lcl-038	nsr+ nis-	Lactococcus	lactis	lactis	15	LA	1.98	0.27	5.689	16.881	11.19	3.46277777777778	14.4886666666667	11.1003333333333	0.782595606543999	0.0577630112324218	45	1	0	0	0	0	0	0	0	0	4.42	6.18	A	5.38833333333333	5.53537844400649	2	5.53145396045723	0.561559236168031
Lcl-038	nsr+ nis-	Lactococcus	lactis	lactis	15	LA	1.98	0.27	5.689	16.881	11.19	3.46277777777778	14.4886666666667	11.1003333333333	0.782595606543999	0.0577630112324218	45	1	0	0	0	0	0	0	0	0	4.42	6.18	A	5.48916666666667	6.43141854277309	2.10083333333333	6.38491668984719	0.992385967210221
Lcl-038	nsr+ nis-	Lactococcus	lactis	lactis	15	LA	1.98	0.27	5.689	16.881	11.19	3.46277777777778	14.4886666666667	11.1003333333333	0.782595606543999	0.0577630112324218	45	1	0	0	0	0	0	0	0	0	4.42	6.18	A	5.48916666666667	5.49159580573575	2.10083333333333	5.48767132218649	0.539457824737835
Lcl-038	nsr+ nis-	Lactococcus	lactis	lactis	15	LA	1.98	0.27	5.689	16.881	11.19	3.46277777777778	14.4886666666667	11.1003333333333	0.782595606543999	0.0577630112324218	45	1	0	0	0	0	0	0	0	0	4.42	6.18	A	5.58833333333333	6.43141854277309	2.2	6.38491668984719	0.992385967210221
Lcl-038	nsr+ nis-	Lactococcus	lactis	lactis	15	LA	1.98	0.27	5.689	16.881	11.19	3.46277777777778	14.4886666666667	11.1003333333333	0.782595606543999	0.0577630112324218	45	1	0	0	0	0	0	0	0	0	4.42	6.18	A	5.58833333333333	5.44370740126226	2.2	5.439782917713	0.515283828564756
Lcl-038	nsr+ nis-	Lactococcus	lactis	lactis	15	LA	1.98	0.27	5.689	16.881	11.19	3.46277777777778	14.4886666666667	11.1003333333333	0.782595606543999	0.0577630112324218	45	1	0	0	0	0	0	0	0	0	4.42	6.18	A	5.68833333333333	6.4413791749868	2.3	6.3948773220609	0.997414079707659
Lcl-038	nsr+ nis-	Lactococcus	lactis	lactis	15	LA	1.98	0.27	5.689	16.881	11.19	3.46277777777778	14.4886666666667	11.1003333333333	0.782595606543999	0.0577630112324218	45	1	0	0	0	0	0	0	0	0	4.42	6.18	A	5.68833333333333	5.4033293476877	2.3	5.39940486413844	0.494901046483799
Lcl-038	nsr+ nis-	Lactococcus	lactis	lactis	15	LA	1.98	0.27	5.689	16.881	11.19	3.46277777777778	14.4886666666667	11.1003333333333	0.782595606543999	0.0577630112324218	45	1	0	0	0	0	0	0	0	0	4.42	6.18	A	5.7883333333333304	6.44353548728493	2.4	6.39703363435903	0.998502582985566
Lcl-038	nsr+ nis-	Lactococcus	lactis	lactis	15	LA	1.98	0.27	5.689	16.881	11.19	3.46277777777778	14.4886666666667	11.1003333333333	0.782595606543999	0.0577630112324218	45	1	0	0	0	0	0	0	0	0	4.42	6.18	A	5.7883333333333304	5.36589167191749	2.4	5.36196718836823	0.476002562795558
Lcl-038	nsr+ nis-	Lactococcus	lactis	lactis	15	LA	1.98	0.27	5.689	16.881	11.19	3.46277777777778	14.4886666666667	11.1003333333333	0.782595606543999	0.0577630112324218	45	1	0	0	0	0	0	0	0	0	4.42	6.18	A	5.88833333333333	6.4413791749868	2.5	6.3948773220609	0.997414079707659
Lcl-038	nsr+ nis-	Lactococcus	lactis	lactis	15	LA	1.98	0.27	5.689	16.881	11.19	3.46277777777778	14.4886666666667	11.1003333333333	0.782595606543999	0.0577630112324218	45	1	0	0	0	0	0	0	0	0	4.42	6.18	A	5.88833333333333	5.32809466662268	2.5	5.32417018307342	0.456922690091584
Lcl-038	nsr+ nis-	Lactococcus	lactis	lactis	15	LA	1.98	0.27	5.689	16.881	11.19	3.46277777777778	14.4886666666667	11.1003333333333	0.782595606543999	0.0577630112324218	45	1	0	0	0	0	0	0	0	0	4.42	6.18	A	5.98866666666667	6.4413791749868	2.60033333333333	6.3948773220609	0.997414079707659
Lcl-038	nsr+ nis-	Lactococcus	lactis	lactis	15	LA	1.98	0.27	5.689	16.881	11.19	3.46277777777778	14.4886666666667	11.1003333333333	0.782595606543999	0.0577630112324218	45	1	0	0	0	0	0	0	0	0	4.42	6.18	A	5.98866666666667	5.29847667517703	2.60033333333333	5.29455219162777	0.441971571553947
Lcl-038	nsr+ nis-	Lactococcus	lactis	lactis	15	LA	1.98	0.27	5.689	16.881	11.19	3.46277777777778	14.4886666666667	11.1003333333333	0.782595606543999	0.0577630112324218	45	1	0	0	0	0	0	0	0	0	4.42	6.18	A	6.08866666666667	6.4413791749868	2.70033333333333	6.3948773220609	0.997414079707659
Lcl-038	nsr+ nis-	Lactococcus	lactis	lactis	15	LA	1.98	0.27	5.689	16.881	11.19	3.46277777777778	14.4886666666667	11.1003333333333	0.782595606543999	0.0577630112324218	45	1	0	0	0	0	0	0	0	0	4.42	6.18	A	6.08866666666667	5.27438430105136	2.70033333333333	5.2704598175021	0.429809776515716
Lcl-038	nsr+ nis-	Lactococcus	lactis	lactis	15	LA	1.98	0.27	5.689	16.881	11.19	3.46277777777778	14.4886666666667	11.1003333333333	0.782595606543999	0.0577630112324218	45	1	0	0	0	0	0	0	0	0	4.42	6.18	A	6.18833333333333	6.43357485507123	2.8	6.38707300214533	0.993474470488129
Lcl-038	nsr+ nis-	Lactococcus	lactis	lactis	15	LA	1.98	0.27	5.689	16.881	11.19	3.46277777777778	14.4886666666667	11.1003333333333	0.782595606543999	0.0577630112324218	45	1	0	0	0	0	0	0	0	0	4.42	6.18	A	6.18833333333333	5.238169265813	2.8	5.23424478226375	0.411528479970441
Lcl-038	nsr+ nis-	Lactococcus	lactis	lactis	15	LA	1.98	0.27	5.689	16.881	11.19	3.46277777777778	14.4886666666667	11.1003333333333	0.782595606543999	0.0577630112324218	45	1	0	0	0	0	0	0	0	0	4.42	6.18	A	6.2883333333333304	6.42818351981323	2.9	6.38168166688733	0.990752932376187
Lcl-038	nsr+ nis-	Lactococcus	lactis	lactis	15	LA	1.98	0.27	5.689	16.881	11.19	3.46277777777778	14.4886666666667	11.1003333333333	0.782595606543999	0.0577630112324218	45	1	0	0	0	0	0	0	0	0	4.42	6.18	A	6.2883333333333304	5.19386615088161	2.9	5.18994166733236	0.38916433268715
Lcl-038	nsr+ nis-	Lactococcus	lactis	lactis	15	LA	1.98	0.27	5.689	16.881	11.19	3.46277777777778	14.4886666666667	11.1003333333333	0.782595606543999	0.0577630112324218	45	1	0	0	0	0	0	0	0	0	4.42	6.18	A	6.38883333333333	6.43814415202693	3.0005	6.39164229910103	0.995781044873625
Lcl-038	nsr+ nis-	Lactococcus	lactis	lactis	15	LA	1.98	0.27	5.689	16.881	11.19	3.46277777777778	14.4886666666667	11.1003333333333	0.782595606543999	0.0577630112324218	45	1	0	0	0	0	0	0	0	0	4.42	6.18	A	6.38883333333333	5.14885364800542	3.0005	5.14492916445616	0.366442087412255
Lcl-038	nsr+ nis-	Lactococcus	lactis	lactis	15	LA	1.98	0.27	5.689	16.881	11.19	3.46277777777778	14.4886666666667	11.1003333333333	0.782595606543999	0.0577630112324218	45	1	0	0	0	0	0	0	0	0	4.42	6.18	A	6.48866666666667	6.44030046432507	3.10033333333333	6.39379861139917	0.996869548151532
Lcl-038	nsr+ nis-	Lactococcus	lactis	lactis	15	LA	1.98	0.27	5.689	16.881	11.19	3.46277777777778	14.4886666666667	11.1003333333333	0.782595606543999	0.0577630112324218	45	1	0	0	0	0	0	0	0	0	4.42	6.18	A	6.48866666666667	5.09125812020898	3.10033333333333	5.08733363665972	0.337367949657084
Lcl-038	nsr+ nis-	Lactococcus	lactis	lactis	15	LA	1.98	0.27	5.689	16.881	11.19	3.46277777777778	14.4886666666667	11.1003333333333	0.782595606543999	0.0577630112324218	45	1	0	0	0	0	0	0	0	0	4.42	6.18	A	6.58833333333333	6.44030046432507	3.2	6.39379861139917	0.996869548151532
Lcl-038	nsr+ nis-	Lactococcus	lactis	lactis	15	LA	1.98	0.27	5.689	16.881	11.19	3.46277777777778	14.4886666666667	11.1003333333333	0.782595606543999	0.0577630112324218	45	1	0	0	0	0	0	0	0	0	4.42	6.18	A	6.58833333333333	5.0292482730613	3.2	5.02532378951204	0.3060654699833
Lcl-038	nsr+ nis-	Lactococcus	lactis	lactis	15	LA	1.98	0.27	5.689	16.881	11.19	3.46277777777778	14.4886666666667	11.1003333333333	0.782595606543999	0.0577630112324218	45	1	0	0	0	0	0	0	0	0	4.42	6.18	A	6.68833333333333	6.43814415202693	3.3	6.39164229910103	0.995781044873625
Lcl-038	nsr+ nis-	Lactococcus	lactis	lactis	15	LA	1.98	0.27	5.689	16.881	11.19	3.46277777777778	14.4886666666667	11.1003333333333	0.782595606543999	0.0577630112324218	45	1	0	0	0	0	0	0	0	0	4.42	6.18	A	6.68833333333333	4.96640696109143	3.3	4.96248247754217	0.274343268089687
Lcl-038	nsr+ nis-	Lactococcus	lactis	lactis	15	LA	1.98	0.27	5.689	16.881	11.19	3.46277777777778	14.4886666666667	11.1003333333333	0.782595606543999	0.0577630112324218	45	1	0	0	0	0	0	0	0	0	4.42	6.18	A	6.7883333333333304	6.4413791749868	3.4	6.3948773220609	0.997414079707659
Lcl-038	nsr+ nis-	Lactococcus	lactis	lactis	15	LA	1.98	0.27	5.689	16.881	11.19	3.46277777777778	14.4886666666667	11.1003333333333	0.782595606543999	0.0577630112324218	45	1	0	0	0	0	0	0	0	0	4.42	6.18	A	6.7883333333333304	4.9092745697063	3.4	4.90535008615704	0.245502920914045
Lcl-038	nsr+ nis-	Lactococcus	lactis	lactis	15	LA	1.98	0.27	5.689	16.881	11.19	3.46277777777778	14.4886666666667	11.1003333333333	0.782595606543999	0.0577630112324218	45	1	0	0	0	0	0	0	0	0	4.42	6.18	A	6.88833333333333	6.43141854277309	3.5	6.38491668984719	0.992385967210221
Lcl-038	nsr+ nis-	Lactococcus	lactis	lactis	15	LA	1.98	0.27	5.689	16.881	11.19	3.46277777777778	14.4886666666667	11.1003333333333	0.782595606543999	0.0577630112324218	45	1	0	0	0	0	0	0	0	0	4.42	6.18	A	6.88833333333333	4.85688495734976	3.5	4.8529604738005	0.219056721619239
Lcl-038	nsr+ nis-	Lactococcus	lactis	lactis	15	LA	1.98	0.27	5.689	16.881	11.19	3.46277777777778	14.4886666666667	11.1003333333333	0.782595606543999	0.0577630112324218	45	1	0	0	0	0	0	0	0	0	4.42	6.18	A	6.98866666666667	6.431688026855	3.60033333333333	6.3851861739291	0.992522002378573
Lcl-038	nsr+ nis-	Lactococcus	lactis	lactis	15	LA	1.98	0.27	5.689	16.881	11.19	3.46277777777778	14.4886666666667	11.1003333333333	0.782595606543999	0.0577630112324218	45	1	0	0	0	0	0	0	0	0	4.42	6.18	A	6.98866666666667	4.81443302542146	3.60033333333333	4.8105085418722	0.197627048794314
Lcl-038	nsr+ nis-	Lactococcus	lactis	lactis	15	LA	1.98	0.27	5.689	16.881	11.19	3.46277777777778	14.4886666666667	11.1003333333333	0.782595606543999	0.0577630112324218	45	1	0	0	0	0	0	0	0	0	4.42	6.18	A	7.08866666666667	6.43734231458506	3.70033333333333	6.39084046165916	0.99537627851182
Lcl-038	nsr+ nis-	Lactococcus	lactis	lactis	15	LA	1.98	0.27	5.689	16.881	11.19	3.46277777777778	14.4886666666667	11.1003333333333	0.782595606543999	0.0577630112324218	45	1	0	0	0	0	0	0	0	0	4.42	6.18	A	7.08866666666667	4.77770852516275	3.70033333333333	4.77378404161349	0.179088575055776
Lcl-038	nsr+ nis-	Lactococcus	lactis	lactis	15	LA	1.98	0.27	5.689	16.881	11.19	3.46277777777778	14.4886666666667	11.1003333333333	0.782595606543999	0.0577630112324218	45	1	0	0	0	0	0	0	0	0	4.42	6.18	A	7.18866666666667	6.4341072916252	3.80033333333333	6.3876054386993	0.993743243677786
Lcl-038	nsr+ nis-	Lactococcus	lactis	lactis	15	LA	1.98	0.27	5.689	16.881	11.19	3.46277777777778	14.4886666666667	11.1003333333333	0.782595606543999	0.0577630112324218	45	1	0	0	0	0	0	0	0	0	4.42	6.18	A	7.18866666666667	4.75077001219647	3.80033333333333	4.74684552864721	0.165490053315174
Lcl-038	nsr+ nis-	Lactococcus	lactis	lactis	15	LA	1.98	0.27	5.689	16.881	11.19	3.46277777777778	14.4886666666667	11.1003333333333	0.782595606543999	0.0577630112324218	45	1	0	0	0	0	0	0	0	0	4.42	6.18	A	7.2883333333333304	6.43626360392333	3.9	6.38976175099743	0.994831746955694
Lcl-038	nsr+ nis-	Lactococcus	lactis	lactis	15	LA	1.98	0.27	5.689	16.881	11.19	3.46277777777778	14.4886666666667	11.1003333333333	0.782595606543999	0.0577630112324218	45	1	0	0	0	0	0	0	0	0	4.42	6.18	A	7.2883333333333304	4.72900099735888	3.9	4.72507651380962	0.154501086629787
Lcl-038	nsr+ nis-	Lactococcus	lactis	lactis	15	LA	1.98	0.27	5.689	16.881	11.19	3.46277777777778	14.4886666666667	11.1003333333333	0.782595606543999	0.0577630112324218	45	1	0	0	0	0	0	0	0	0	4.42	6.18	A	7.38833333333333	6.43060283088942	4	6.38410097796352	0.991974197050595
Lcl-038	nsr+ nis-	Lactococcus	lactis	lactis	15	LA	1.98	0.27	5.689	16.881	11.19	3.46277777777778	14.4886666666667	11.1003333333333	0.782595606543999	0.0577630112324218	45	1	0	0	0	0	0	0	0	0	4.42	6.18	A	7.38833333333333	4.70683868069494	4	4.70291419714568	0.143313581760684
Lcl-038	nsr+ nis-	Lactococcus	lactis	lactis	15	LA	1.98	0.27	5.689	16.881	11.19	3.46277777777778	14.4886666666667	11.1003333333333	0.782595606543999	0.0577630112324218	45	1	0	0	0	0	0	0	0	0	4.42	6.18	A	7.48833333333333	6.42251626147546	4.1	6.37601440854956	0.987892108699238
Lcl-038	nsr+ nis-	Lactococcus	lactis	lactis	15	LA	1.98	0.27	5.689	16.881	11.19	3.46277777777778	14.4886666666667	11.1003333333333	0.782595606543999	0.0577630112324218	45	1	0	0	0	0	0	0	0	0	4.42	6.18	A	7.48833333333333	4.68855504636112	4.1	4.68463056281187	0.134084030029423
Lcl-038	nsr+ nis-	Lactococcus	lactis	lactis	15	LA	1.98	0.27	5.689	16.881	11.19	3.46277777777778	14.4886666666667	11.1003333333333	0.782595606543999	0.0577630112324218	45	1	0	0	0	0	0	0	0	0	4.42	6.18	A	7.58833333333333	6.40904488841335	4.2	6.36254303548745	0.981091779382984
Lcl-038	nsr+ nis-	Lactococcus	lactis	lactis	15	LA	1.98	0.27	5.689	16.881	11.19	3.46277777777778	14.4886666666667	11.1003333333333	0.782595606543999	0.0577630112324218	45	1	0	0	0	0	0	0	0	0	4.42	6.18	A	7.58833333333333	4.66621765919526	4.2	4.66229317564601	0.122808149828338
Lcl-038	nsr+ nis-	Lactococcus	lactis	lactis	15	LA	1.98	0.27	5.689	16.881	11.19	3.46277777777778	14.4886666666667	11.1003333333333	0.782595606543999	0.0577630112324218	45	1	0	0	0	0	0	0	0	0	4.42	6.18	A	7.68833333333333	6.41227991137321	4.3	6.36577805844731	0.982724814217018
Lcl-038	nsr+ nis-	Lactococcus	lactis	lactis	15	LA	1.98	0.27	5.689	16.881	11.19	3.46277777777778	14.4886666666667	11.1003333333333	0.782595606543999	0.0577630112324218	45	1	0	0	0	0	0	0	0	0	4.42	6.18	A	7.68833333333333	4.65685232928431	4.3	4.65292784573505	0.118080545058118
Lcl-038	nsr+ nis-	Lactococcus	lactis	lactis	15	LA	1.98	0.27	5.689	16.881	11.19	3.46277777777778	14.4886666666667	11.1003333333333	0.782595606543999	0.0577630112324218	45	1	0	0	0	0	0	0	0	0	4.42	6.18	A	7.7883333333333304	6.40257695843476	4.4	6.35607510550886	0.977826777838888
Lcl-038	nsr+ nis-	Lactococcus	lactis	lactis	15	LA	1.98	0.27	5.689	16.881	11.19	3.46277777777778	14.4886666666667	11.1003333333333	0.782595606543999	0.0577630112324218	45	1	0	0	0	0	0	0	0	0	4.42	6.18	A	7.7883333333333304	4.64748699937335	4.4	4.64356251582409	0.113352940287898
Lcl-038	nsr+ nis-	Lactococcus	lactis	lactis	15	LA	1.98	0.27	5.689	16.881	11.19	3.46277777777778	14.4886666666667	11.1003333333333	0.782595606543999	0.0577630112324218	45	1	0	0	0	0	0	0	0	0	4.42	6.18	A	7.88833333333333	6.40257695843476	4.5	6.35607510550886	0.977826777838888
Lcl-038	nsr+ nis-	Lactococcus	lactis	lactis	15	LA	1.98	0.27	5.689	16.881	11.19	3.46277777777778	14.4886666666667	11.1003333333333	0.782595606543999	0.0577630112324218	45	1	0	0	0	0	0	0	0	0	4.42	6.18	A	7.88833333333333	4.63645750513744	4.5	4.63253302158819	0.10778526781308399
Lcl-038	nsr+ nis-	Lactococcus	lactis	lactis	15	LA	1.98	0.27	5.689	16.881	11.19	3.46277777777778	14.4886666666667	11.1003333333333	0.782595606543999	0.0577630112324218	45	1	0	0	0	0	0	0	0	0	4.42	6.18	A	7.98833333333333	6.40257695843476	4.6	6.35607510550886	0.977826777838888
Lcl-038	nsr+ nis-	Lactococcus	lactis	lactis	15	LA	1.98	0.27	5.689	16.881	11.19	3.46277777777778	14.4886666666667	11.1003333333333	0.782595606543999	0.0577630112324218	45	1	0	0	0	0	0	0	0	0	4.42	6.18	A	7.98833333333333	4.62306878487473	4.6	4.61914430132547	0.101026661508451
Lcl-038	nsr+ nis-	Lactococcus	lactis	lactis	15	LA	1.98	0.27	5.689	16.881	11.19	3.46277777777778	14.4886666666667	11.1003333333333	0.782595606543999	0.0577630112324218	45	1	0	0	0	0	0	0	0	0	4.42	6.18	A	8.08866666666667	6.41066352784871	4.70033333333333	6.36416167492281	0.981908866190245
Lcl-038	nsr+ nis-	Lactococcus	lactis	lactis	15	LA	1.98	0.27	5.689	16.881	11.19	3.46277777777778	14.4886666666667	11.1003333333333	0.782595606543999	0.0577630112324218	45	1	0	0	0	0	0	0	0	0	4.42	6.18	A	8.08866666666667	4.6116088456395	4.70033333333333	4.60768436209024	0.0952417010308162
Lcl-038	nsr+ nis-	Lactococcus	lactis	lactis	15	LA	1.98	0.27	5.689	16.881	11.19	3.46277777777778	14.4886666666667	11.1003333333333	0.782595606543999	0.0577630112324218	45	1	0	0	0	0	0	0	0	0	4.42	6.18	A	8.18833333333333	6.4050027548148	4.8	6.3585009018889	0.979051316285147
Lcl-038	nsr+ nis-	Lactococcus	lactis	lactis	15	LA	1.98	0.27	5.689	16.881	11.19	3.46277777777778	14.4886666666667	11.1003333333333	0.782595606543999	0.0577630112324218	45	1	0	0	0	0	0	0	0	0	4.42	6.18	A	8.18833333333333	4.59348055945461	4.8	4.58955607590535	0.0860905688167418
Lcl-038	nsr+ nis-	Lactococcus	lactis	lactis	15	LA	1.98	0.27	5.689	16.881	11.19	3.46277777777778	14.4886666666667	11.1003333333333	0.782595606543999	0.0577630112324218	45	1	0	0	0	0	0	0	0	0	4.42	6.18	A	8.28866666666667	6.4068886224212	4.90033333333333	6.3603867694953	0.980003299480271
Lcl-038	nsr+ nis-	Lactococcus	lactis	lactis	15	LA	1.98	0.27	5.689	16.881	11.19	3.46277777777778	14.4886666666667	11.1003333333333	0.782595606543999	0.0577630112324218	45	1	0	0	0	0	0	0	0	0	4.42	6.18	A	8.28866666666667	4.57845123550562	4.90033333333333	4.57452675195636	0.0785037881832764
Lcl-038	nsr+ nis-	Lactococcus	lactis	lactis	15	LA	1.98	0.27	5.689	16.881	11.19	3.46277777777778	14.4886666666667	11.1003333333333	0.782595606543999	0.0577630112324218	45	1	0	0	0	0	0	0	0	0	4.42	6.18	A	8.38866666666667	6.4068886224212	5.00033333333333	6.3603867694953	0.980003299480271
Lcl-038	nsr+ nis-	Lactococcus	lactis	lactis	15	LA	1.98	0.27	5.689	16.881	11.19	3.46277777777778	14.4886666666667	11.1003333333333	0.782595606543999	0.0577630112324218	45	1	0	0	0	0	0	0	0	0	4.42	6.18	A	8.38866666666667	4.57009025850628	5.00033333333333	4.56616577495702	0.0742831792862499
Lcl-038	nsr+ nis-	Lactococcus	lactis	lactis	15	LA	1.98	0.27	5.689	16.881	11.19	3.46277777777778	14.4886666666667	11.1003333333333	0.782595606543999	0.0577630112324218	45	1	0	0	0	0	0	0	0	0	4.42	6.18	A	8.48866666666667	6.4068886224212	5.10033333333333	6.3603867694953	0.980003299480271
Lcl-038	nsr+ nis-	Lactococcus	lactis	lactis	15	LA	1.98	0.27	5.689	16.881	11.19	3.46277777777778	14.4886666666667	11.1003333333333	0.782595606543999	0.0577630112324218	45	1	0	0	0	0	0	0	0	0	4.42	6.18	A	8.48866666666667	4.56626072237137	5.10033333333333	4.56233623882211	0.0723500350755001
Lcl-038	nsr+ nis-	Lactococcus	lactis	lactis	15	LA	1.98	0.27	5.689	16.881	11.19	3.46277777777778	14.4886666666667	11.1003333333333	0.782595606543999	0.0577630112324218	45	1	0	0	0	0	0	0	0	0	4.42	6.18	A	8.58833333333333	6.39880205300724	5.2	6.3523002000813404	0.975921211128913
Lcl-038	nsr+ nis-	Lactococcus	lactis	lactis	15	LA	1.98	0.27	5.689	16.881	11.19	3.46277777777778	14.4886666666667	11.1003333333333	0.782595606543999	0.0577630112324218	45	1	0	0	0	0	0	0	0	0	4.42	6.18	A	8.58833333333333	4.56626072237137	5.2	4.56233623882211	0.0723500350755001
Lcl-038	nsr+ nis-	Lactococcus	lactis	lactis	15	LA	1.98	0.27	5.689	16.881	11.19	3.46277777777778	14.4886666666667	11.1003333333333	0.782595606543999	0.0577630112324218	45	1	0	0	0	0	0	0	0	0	4.42	6.18	A	8.68866666666667	6.39880205300724	5.30033333333333	6.3523002000813404	0.975921211128913
Lcl-038	nsr+ nis-	Lactococcus	lactis	lactis	15	LA	1.98	0.27	5.689	16.881	11.19	3.46277777777778	14.4886666666667	11.1003333333333	0.782595606543999	0.0577630112324218	45	1	0	0	0	0	0	0	0	0	4.42	6.18	A	8.68866666666667	4.56935968460726	5.30033333333333	4.565435201058	0.0739143866561085
Lcl-038	nsr+ nis-	Lactococcus	lactis	lactis	15	LA	1.98	0.27	5.689	16.881	11.19	3.46277777777778	14.4886666666667	11.1003333333333	0.782595606543999	0.0577630112324218	45	1	0	0	0	0	0	0	0	0	4.42	6.18	A	8.78833333333333	6.39880205300724	5.4	6.3523002000813404	0.975921211128913
Lcl-038	nsr+ nis-	Lactococcus	lactis	lactis	15	LA	1.98	0.27	5.689	16.881	11.19	3.46277777777778	14.4886666666667	11.1003333333333	0.782595606543999	0.0577630112324218	45	1	0	0	0	0	0	0	0	0	4.42	6.18	A	8.78833333333333	4.56234235673899	5.4	4.55841787318973	0.0703720498650239
Lcl-038	nsr+ nis-	Lactococcus	lactis	lactis	15	LA	1.98	0.27	5.689	16.881	11.19	3.46277777777778	14.4886666666667	11.1003333333333	0.782595606543999	0.0577630112324218	45	1	0	0	0	0	0	0	0	0	4.42	6.18	A	8.88866666666667	6.39880205300724	5.50033333333333	6.3523002000813404	0.975921211128913
Lcl-038	nsr+ nis-	Lactococcus	lactis	lactis	15	LA	1.98	0.27	5.689	16.881	11.19	3.46277777777778	14.4886666666667	11.1003333333333	0.782595606543999	0.0577630112324218	45	1	0	0	0	0	0	0	0	0	4.42	6.18	A	8.88866666666667	4.5592433945031	5.50033333333333	4.55531891095384	0.0688076982844155
Lcl-038	nsr+ nis-	Lactococcus	lactis	lactis	15	LA	1.98	0.27	5.689	16.881	11.19	3.46277777777778	14.4886666666667	11.1003333333333	0.782595606543999	0.0577630112324218	45	1	0	0	0	0	0	0	0	0	4.42	6.18	A	8.98866666666667	6.39691618540084	5.60033333333333	6.35041433247494	0.974969227933789
Lcl-038	nsr+ nis-	Lactococcus	lactis	lactis	15	LA	1.98	0.27	5.689	16.881	11.19	3.46277777777778	14.4886666666667	11.1003333333333	0.782595606543999	0.0577630112324218	45	1	0	0	0	0	0	0	0	0	4.42	6.18	A	8.98866666666667	4.55222606663483	5.60033333333333	4.54830158308557	0.065265361493331
Lcl-038	nsr+ nis-	Lactococcus	lactis	lactis	15	LA	1.98	0.27	5.689	16.881	11.19	3.46277777777778	14.4886666666667	11.1003333333333	0.782595606543999	0.0577630112324218	45	1	0	0	0	0	0	0	0	0	4.42	6.18	A	9.08866666666667	6.39691618540084	5.70033333333333	6.35041433247494	0.974969227933789
Lcl-038	nsr+ nis-	Lactococcus	lactis	lactis	15	LA	1.98	0.27	5.689	16.881	11.19	3.46277777777778	14.4886666666667	11.1003333333333	0.782595606543999	0.0577630112324218	45	1	0	0	0	0	0	0	0	0	4.42	6.18	A	9.08866666666667	4.55532502887072	5.70033333333333	4.55140054532146	0.0668297130739394
Lcl-038	nsr+ nis-	Lactococcus	lactis	lactis	15	LA	1.98	0.27	5.689	16.881	11.19	3.46277777777778	14.4886666666667	11.1003333333333	0.782595606543999	0.0577630112324218	45	1	0	0	0	0	0	0	0	0	4.42	6.18	A	9.18866666666667	6.39503031779444	5.80033333333333	6.34852846486854	0.974017244738664
Lcl-038	nsr+ nis-	Lactococcus	lactis	lactis	15	LA	1.98	0.27	5.689	16.881	11.19	3.46277777777778	14.4886666666667	11.1003333333333	0.782595606543999	0.0577630112324218	45	1	0	0	0	0	0	0	0	0	4.42	6.18	A	9.18866666666667	4.55066470386863	5.80033333333333	4.54674022031937	0.0644771878644555
Lcl-038	nsr+ nis-	Lactococcus	lactis	lactis	15	LA	1.98	0.27	5.689	16.881	11.19	3.46277777777778	14.4886666666667	11.1003333333333	0.782595606543999	0.0577630112324218	45	1	0	0	0	0	0	0	0	0	4.42	6.18	A	9.28866666666667	6.39503031779444	5.90033333333333	6.34852846486854	0.974017244738664
Lcl-038	nsr+ nis-	Lactococcus	lactis	lactis	15	LA	1.98	0.27	5.689	16.881	11.19	3.46277777777778	14.4886666666667	11.1003333333333	0.782595606543999	0.0577630112324218	45	1	0	0	0	0	0	0	0	0	4.42	6.18	A	9.28866666666667	4.55302170673481	5.90033333333333	4.54909722318555	0.0656669994460561
Lcl-038	nsr+ nis-	Lactococcus	lactis	lactis	15	LA	1.98	0.27	5.689	16.881	11.19	3.46277777777778	14.4886666666667	11.1003333333333	0.782595606543999	0.0577630112324218	45	1	0	0	0	0	0	0	0	0	4.42	6.18	A	9.38833333333333	6.39503031779444	6	6.34852846486854	0.974017244738664
Lcl-038	nsr+ nis-	Lactococcus	lactis	lactis	15	LA	1.98	0.27	5.689	16.881	11.19	3.46277777777778	14.4886666666667	11.1003333333333	0.782595606543999	0.0577630112324218	45	1	0	0	0	0	0	0	0	0	4.42	6.18	A	9.38833333333333	4.55146034396861	6	4.54753586041935	0.0648788258171806
Lcl-038	nsr+ nis-	Lactococcus	lactis	lactis	15	LA	1.98	0.27	5.689	16.881	11.19	3.46277777777778	14.4886666666667	11.1003333333333	0.782595606543999	0.0577630112324218	45	1	0	0	0	0	0	0	0	0	4.42	6.18	A	9.48833333333333	6.39691618540084	6.1	6.35041433247494	0.974969227933789
Lcl-038	nsr+ nis-	Lactococcus	lactis	lactis	15	LA	1.98	0.27	5.689	16.881	11.19	3.46277777777778	14.4886666666667	11.1003333333333	0.782595606543999	0.0577630112324218	45	1	0	0	0	0	0	0	0	0	4.42	6.18	A	9.48833333333333	4.54828955071583	6.1	4.54436506716657	0.0632782140448537
Lcl-038	nsr+ nis-	Lactococcus	lactis	lactis	15	LA	1.98	0.27	5.689	16.881	11.19	3.46277777777778	14.4886666666667	11.1003333333333	0.782595606543999	0.0577630112324218	45	1	0	0	0	0	0	0	0	0	4.42	6.18	A	9.58833333333333	6.40257695843476	6.2	6.35607510550886	0.977826777838888
Lcl-038	nsr+ nis-	Lactococcus	lactis	lactis	15	LA	1.98	0.27	5.689	16.881	11.19	3.46277777777778	14.4886666666667	11.1003333333333	0.782595606543999	0.0577630112324218	45	1	0	0	0	0	0	0	0	0	4.42	6.18	A	9.58833333333333	4.54362922571374	6.2	4.53970474216448	0.0609256888353698
Lcl-038	nsr+ nis-	Lactococcus	lactis	lactis	15	LA	1.98	0.27	5.689	16.881	11.19	3.46277777777778	14.4886666666667	11.1003333333333	0.782595606543999	0.0577630112324218	45	1	0	0	0	0	0	0	0	0	4.42	6.18	A	9.68833333333333	6.3966584081009	6.3	6.350156555175	0.97483910233176
Lcl-038	nsr+ nis-	Lactococcus	lactis	lactis	15	LA	1.98	0.27	5.689	16.881	11.19	3.46277777777778	14.4886666666667	11.1003333333333	0.782595606543999	0.0577630112324218	45	1	0	0	0	0	0	0	0	0	4.42	6.18	A	9.68833333333333	4.54362922571374	6.3	4.53970474216448	0.0609256888353698
Lcl-038	nsr+ nis-	Lactococcus	lactis	lactis	15	LA	1.98	0.27	5.689	16.881	11.19	3.46277777777778	14.4886666666667	11.1003333333333	0.782595606543999	0.0577630112324218	45	1	0	0	0	0	0	0	0	0	4.42	6.18	A	9.78833333333333	6.38885399016064	6.4	6.34235213723474	0.970899443629509
Lcl-038	nsr+ nis-	Lactococcus	lactis	lactis	15	LA	1.98	0.27	5.689	16.881	11.19	3.46277777777778	14.4886666666667	11.1003333333333	0.782595606543999	0.0577630112324218	45	1	0	0	0	0	0	0	0	0	4.42	6.18	A	9.78833333333333	4.54362922571374	6.4	4.53970474216448	0.0609256888353698
Lcl-038	nsr+ nis-	Lactococcus	lactis	lactis	15	LA	1.98	0.27	5.689	16.881	11.19	3.46277777777778	14.4886666666667	11.1003333333333	0.782595606543999	0.0577630112324218	45	1	0	0	0	0	0	0	0	0	4.42	6.18	A	9.88833333333333	6.38885399016064	6.5	6.34235213723474	0.970899443629509
Lcl-038	nsr+ nis-	Lactococcus	lactis	lactis	15	LA	1.98	0.27	5.689	16.881	11.19	3.46277777777778	14.4886666666667	11.1003333333333	0.782595606543999	0.0577630112324218	45	1	0	0	0	0	0	0	0	0	4.42	6.18	A	9.88833333333333	4.54127222284756	6.5	4.53734773929831	0.0597358772537691
Lcl-038	nsr+ nis-	Lactococcus	lactis	lactis	15	LA	1.98	0.27	5.689	16.881	11.19	3.46277777777778	14.4886666666667	11.1003333333333	0.782595606543999	0.0577630112324218	45	1	0	0	0	0	0	0	0	0	4.42	6.18	A	9.98833333333333	6.38319993866171	6.6	6.33669808573581	0.968045286745389
Lcl-038	nsr+ nis-	Lactococcus	lactis	lactis	15	LA	1.98	0.27	5.689	16.881	11.19	3.46277777777778	14.4886666666667	11.1003333333333	0.782595606543999	0.0577630112324218	45	1	0	0	0	0	0	0	0	0	4.42	6.18	A	9.98833333333333	4.54047447080402	6.6	4.53654998725476	0.0593331731950356
Lcl-038	nsr+ nis-	Lactococcus	lactis	lactis	15	LA	1.98	0.27	5.689	16.881	11.19	3.46277777777778	14.4886666666667	11.1003333333333	0.782595606543999	0.0577630112324218	45	1	0	0	0	0	0	0	0	0	4.42	6.18	A	10.0883333333333	6.36383601243364	6.7	6.31733415950774	0.958270405254143
Lcl-038	nsr+ nis-	Lactococcus	lactis	lactis	15	LA	1.98	0.27	5.689	16.881	11.19	3.46277777777778	14.4886666666667	11.1003333333333	0.782595606543999	0.0577630112324218	45	1	0	0	0	0	0	0	0	0	4.42	6.18	A	10.0883333333333	4.53414892264152	6.7	4.53022443909226	0.0561400457823749
Lcl-038	nsr+ nis-	Lactococcus	lactis	lactis	15	LA	1.98	0.27	5.689	16.881	11.19	3.46277777777778	14.4886666666667	11.1003333333333	0.782595606543999	0.0577630112324218	45	1	0	0	0	0	0	0	0	0	4.42	6.18	A	10.1883333333333	6.3716404303739	6.8	6.325138577448	0.962210063956395
Lcl-038	nsr+ nis-	Lactococcus	lactis	lactis	15	LA	1.98	0.27	5.689	16.881	11.19	3.46277777777778	14.4886666666667	11.1003333333333	0.782595606543999	0.0577630112324218	45	1	0	0	0	0	0	0	0	0	4.42	6.18	A	10.1883333333333	4.52782337447902	6.8	4.52389889092976	0.0529469183697137
Lcl-038	nsr+ nis-	Lactococcus	lactis	lactis	15	LA	1.98	0.27	5.689	16.881	11.19	3.46277777777778	14.4886666666667	11.1003333333333	0.782595606543999	0.0577630112324218	45	1	0	0	0	0	0	0	0	0	4.42	6.18	A	10.2883333333333	6.37379079681522	6.9	6.32728894388933	0.963295565774526
Lcl-038	nsr+ nis-	Lactococcus	lactis	lactis	15	LA	1.98	0.27	5.689	16.881	11.19	3.46277777777778	14.4886666666667	11.1003333333333	0.782595606543999	0.0577630112324218	45	1	0	0	0	0	0	0	0	0	4.42	6.18	A	10.2883333333333	4.52546637161284	6.9	4.52154188806358	0.0517571067881135
Lcl-038	nsr+ nis-	Lactococcus	lactis	lactis	15	LA	1.98	0.27	5.689	16.881	11.19	3.46277777777778	14.4886666666667	11.1003333333333	0.782595606543999	0.0577630112324218	45	1	0	0	0	0	0	0	0	0	4.42	6.18	A	10.3888333333333	6.36813674531629	7.0005	6.32163489239039	0.960441408890405
Lcl-038	nsr+ nis-	Lactococcus	lactis	lactis	15	LA	1.98	0.27	5.689	16.881	11.19	3.46277777777778	14.4886666666667	11.1003333333333	0.782595606543999	0.0577630112324218	45	1	0	0	0	0	0	0	0	0	4.42	6.18	A	10.3888333333333	4.52149782631652	7.0005	4.51757334276726	0.049753790957053
Lcl-038	nsr+ nis-	Lactococcus	lactis	lactis	15	LA	1.98	0.27	5.689	16.881	11.19	3.46277777777778	14.4886666666667	11.1003333333333	0.782595606543999	0.0577630112324218	45	1	0	0	0	0	0	0	0	0	4.42	6.18	A	10.4886666666667	6.37379079681522	7.10033333333333	6.32728894388933	0.963295565774526
Lcl-038	nsr+ nis-	Lactococcus	lactis	lactis	15	LA	1.98	0.27	5.689	16.881	11.19	3.46277777777778	14.4886666666667	11.1003333333333	0.782595606543999	0.0577630112324218	45	1	0	0	0	0	0	0	0	0	4.42	6.18	A	10.4886666666667	4.52149782631652	7.10033333333333	4.51757334276726	0.049753790957053
Lcl-038	nsr+ nis-	Lactococcus	lactis	lactis	15	LA	1.98	0.27	5.689	16.881	11.19	3.46277777777778	14.4886666666667	11.1003333333333	0.782595606543999	0.0577630112324218	45	1	0	0	0	0	0	0	0	0	4.42	6.18	A	10.5883333333333	6.38183989851045	7.2	6.33533804558455	0.967358740476552
Lcl-038	nsr+ nis-	Lactococcus	lactis	lactis	15	LA	1.98	0.27	5.689	16.881	11.19	3.46277777777778	14.4886666666667	11.1003333333333	0.782595606543999	0.0577630112324218	45	1	0	0	0	0	0	0	0	0	4.42	6.18	A	10.5883333333333	4.52546637161284	7.2	4.52154188806358	0.0517571067881135
Lcl-038	nsr+ nis-	Lactococcus	lactis	lactis	15	LA	1.98	0.27	5.689	16.881	11.19	3.46277777777778	14.4886666666667	11.1003333333333	0.782595606543999	0.0577630112324218	45	1	0	0	0	0	0	0	0	0	4.42	6.18	A	10.6886666666667	6.36626535881298	7.30033333333333	6.31976350588708	0.95949673573483
Lcl-038	nsr+ nis-	Lactococcus	lactis	lactis	15	LA	1.98	0.27	5.689	16.881	11.19	3.46277777777778	14.4886666666667	11.1003333333333	0.782595606543999	0.0577630112324218	45	1	0	0	0	0	0	0	0	0	4.42	6.18	A	10.6886666666667	4.52144704957818	7.30033333333333	4.51752256602892	0.04972815893419
Lcl-038	nsr+ nis-	Lactococcus	lactis	lactis	15	LA	1.98	0.27	5.689	16.881	11.19	3.46277777777778	14.4886666666667	11.1003333333333	0.782595606543999	0.0577630112324218	45	1	0	0	0	0	0	0	0	0	4.42	6.18	A	10.7886666666667	6.35821625711776	7.40033333333333	6.31171440419186	0.955433561032804
Lcl-038	nsr+ nis-	Lactococcus	lactis	lactis	15	LA	1.98	0.27	5.689	16.881	11.19	3.46277777777778	14.4886666666667	11.1003333333333	0.782595606543999	0.0577630112324218	45	1	0	0	0	0	0	0	0	0	4.42	6.18	A	10.7886666666667	4.51986568638019	7.40033333333333	4.51594120283094	0.0489298891167541
Lcl-038	nsr+ nis-	Lactococcus	lactis	lactis	15	LA	1.98	0.27	5.689	16.881	11.19	3.46277777777778	14.4886666666667	11.1003333333333	0.782595606543999	0.0577630112324218	45	1	0	0	0	0	0	0	0	0	4.42	6.18	A	10.8886666666667	6.35016715542253	7.50033333333333	6.30366530249663	0.951370386330778
Lcl-038	nsr+ nis-	Lactococcus	lactis	lactis	15	LA	1.98	0.27	5.689	16.881	11.19	3.46277777777778	14.4886666666667	11.1003333333333	0.782595606543999	0.0577630112324218	45	1	0	0	0	0	0	0	0	0	4.42	6.18	A	10.8886666666667	4.51259394408623	7.50033333333333	4.50866946053698	0.0452591242976182
Lcl-038	nsr+ nis-	Lactococcus	lactis	lactis	15	LA	1.98	0.27	5.689	16.881	11.19	3.46277777777778	14.4886666666667	11.1003333333333	0.782595606543999	0.0577630112324218	45	1	0	0	0	0	0	0	0	0	4.42	6.18	A	10.9886666666667	6.3383382125093	7.60033333333333	6.2918363595834	0.945399153338992
Lcl-038	nsr+ nis-	Lactococcus	lactis	lactis	15	LA	1.98	0.27	5.689	16.881	11.19	3.46277777777778	14.4886666666667	11.1003333333333	0.782595606543999	0.0577630112324218	45	1	0	0	0	0	0	0	0	0	4.42	6.18	A	10.9886666666667	4.50938257737009	7.60033333333333	4.50545809382083	0.0436380311006323
Lcl-038	nsr+ nis-	Lactococcus	lactis	lactis	15	LA	1.98	0.27	5.689	16.881	11.19	3.46277777777778	14.4886666666667	11.1003333333333	0.782595606543999	0.0577630112324218	45	1	0	0	0	0	0	0	0	0	4.42	6.18	A	11.0886666666667	6.33028911081408	7.70033333333333	6.28378725788818	0.941335978636966
Lcl-038	nsr+ nis-	Lactococcus	lactis	lactis	15	LA	1.98	0.27	5.689	16.881	11.19	3.46277777777778	14.4886666666667	11.1003333333333	0.782595606543999	0.0577630112324218	45	1	0	0	0	0	0	0	0	0	4.42	6.18	A	11.0886666666667	4.50938257737009	7.70033333333333	4.50545809382083	0.0436380311006323
Lcl-038	nsr+ nis-	Lactococcus	lactis	lactis	15	LA	1.98	0.27	5.689	16.881	11.19	3.46277777777778	14.4886666666667	11.1003333333333	0.782595606543999	0.0577630112324218	45	1	0	0	0	0	0	0	0	0	4.42	6.18	A	11.1886666666667	6.33216049731739	7.80033333333333	6.28565864439149	0.942280651792542
Lcl-038	nsr+ nis-	Lactococcus	lactis	lactis	15	LA	1.98	0.27	5.689	16.881	11.19	3.46277777777778	14.4886666666667	11.1003333333333	0.782595606543999	0.0577630112324218	45	1	0	0	0	0	0	0	0	0	4.42	6.18	A	11.1886666666667	4.50938257737009	7.80033333333333	4.50545809382083	0.0436380311006323
Lcl-038	nsr+ nis-	Lactococcus	lactis	lactis	15	LA	1.98	0.27	5.689	16.881	11.19	3.46277777777778	14.4886666666667	11.1003333333333	0.782595606543999	0.0577630112324218	45	1	0	0	0	0	0	0	0	0	4.42	6.18	A	11.2886666666667	6.33216049731739	7.90033333333333	6.28565864439149	0.942280651792542
Lcl-038	nsr+ nis-	Lactococcus	lactis	lactis	15	LA	1.98	0.27	5.689	16.881	11.19	3.46277777777778	14.4886666666667	11.1003333333333	0.782595606543999	0.0577630112324218	45	1	0	0	0	0	0	0	0	0	4.42	6.18	A	11.2886666666667	4.5037840285556	7.90033333333333	4.49985954500635	0.0408118918900216
Lcl-038	nsr+ nis-	Lactococcus	lactis	lactis	15	LA	1.98	0.27	5.689	16.881	11.19	3.46277777777778	14.4886666666667	11.1003333333333	0.782595606543999	0.0577630112324218	45	1	0	0	0	0	0	0	0	0	4.42	6.18	A	11.3883333333333	6.33403470759831	8	6.28753285467241	0.943226750386904
Lcl-038	nsr+ nis-	Lactococcus	lactis	lactis	15	LA	1.98	0.27	5.689	16.881	11.19	3.46277777777778	14.4886666666667	11.1003333333333	0.782595606543999	0.0577630112324218	45	1	0	0	0	0	0	0	0	0	4.42	6.18	A	11.3883333333333	4.50784440413342	8	4.50391992058416	0.0428615635121711
Lcl-038	nsr+ nis-	Lactococcus	lactis	lactis	15	LA	1.98	0.27	5.689	16.881	11.19	3.46277777777778	14.4886666666667	11.1003333333333	0.782595606543999	0.0577630112324218	45	1	0	0	0	0	0	0	0	0	4.42	6.18	A	11.4883333333333	6.33216049731739	8.1	6.28565864439149	0.942280651792542
Lcl-038	nsr+ nis-	Lactococcus	lactis	lactis	15	LA	1.98	0.27	5.689	16.881	11.19	3.46277777777778	14.4886666666667	11.1003333333333	0.782595606543999	0.0577630112324218	45	1	0	0	0	0	0	0	0	0	4.42	6.18	A	11.4883333333333	4.5070364488149	8.1	4.50311196526564	0.042453708855234
Lcl-038	nsr+ nis-	Lactococcus	lactis	lactis	15	LA	1.98	0.27	5.689	16.881	11.19	3.46277777777778	14.4886666666667	11.1003333333333	0.782595606543999	0.0577630112324218	45	1	0	0	0	0	0	0	0	0	4.42	6.18	A	11.5883333333333	6.33216049731739	8.2	6.28565864439149	0.942280651792542
Lcl-038	nsr+ nis-	Lactococcus	lactis	lactis	15	LA	1.98	0.27	5.689	16.881	11.19	3.46277777777778	14.4886666666667	11.1003333333333	0.782595606543999	0.0577630112324218	45	1	0	0	0	0	0	0	0	0	4.42	6.18	A	11.5883333333333	4.49985653680243	8.2	4.49593205325318	0.0388292998271875
Lcl-038	nsr+ nis-	Lactococcus	lactis	lactis	15	LA	1.98	0.27	5.689	16.881	11.19	3.46277777777778	14.4886666666667	11.1003333333333	0.782595606543999	0.0577630112324218	45	1	0	0	0	0	0	0	0	0	4.42	6.18	A	11.6883333333333	6.33216049731739	8.3	6.28565864439149	0.942280651792542
Lcl-038	nsr+ nis-	Lactococcus	lactis	lactis	15	LA	1.98	0.27	5.689	16.881	11.19	3.46277777777778	14.4886666666667	11.1003333333333	0.782595606543999	0.0577630112324218	45	1	0	0	0	0	0	0	0	0	4.42	6.18	A	11.6883333333333	4.5038758588371	8.3	4.49995137528784	0.040858247681111
Lcl-038	nsr+ nis-	Lactococcus	lactis	lactis	15	LA	1.98	0.27	5.689	16.881	11.19	3.46277777777778	14.4886666666667	11.1003333333333	0.782595606543999	0.0577630112324218	45	1	0	0	0	0	0	0	0	0	4.42	6.18	A	11.7883333333333	6.33403470759831	8.4	6.28753285467241	0.943226750386904
Lcl-038	nsr+ nis-	Lactococcus	lactis	lactis	15	LA	1.98	0.27	5.689	16.881	11.19	3.46277777777778	14.4886666666667	11.1003333333333	0.782595606543999	0.0577630112324218	45	1	0	0	0	0	0	0	0	0	4.42	6.18	A	11.7883333333333	4.50306790351858	8.4	4.49914341996932	0.0404503930241735
Lcl-038	nsr+ nis-	Lactococcus	lactis	lactis	15	LA	1.98	0.27	5.689	16.881	11.19	3.46277777777778	14.4886666666667	11.1003333333333	0.782595606543999	0.0577630112324218	45	1	0	0	0	0	0	0	0	0	4.42	6.18	A	11.8883333333333	6.33617980719092	8.5	6.28967795426502	0.944309593507541
Lcl-038	nsr+ nis-	Lactococcus	lactis	lactis	15	LA	1.98	0.27	5.689	16.881	11.19	3.46277777777778	14.4886666666667	11.1003333333333	0.782595606543999	0.0577630112324218	45	1	0	0	0	0	0	0	0	0	4.42	6.18	A	11.8883333333333	4.50627927023473	8.5	4.50235478668547	0.0420714862211595
Lcl-038	nsr+ nis-	Lactococcus	lactis	lactis	15	LA	1.98	0.27	5.689	16.881	11.19	3.46277777777778	14.4886666666667	11.1003333333333	0.782595606543999	0.0577630112324218	45	1	0	0	0	0	0	0	0	0	4.42	6.18	A	11.9883333333333	6.33805401747184	8.6	6.29155216454594	0.945255692101903
Lcl-038	nsr+ nis-	Lactococcus	lactis	lactis	15	LA	1.98	0.27	5.689	16.881	11.19	3.46277777777778	14.4886666666667	11.1003333333333	0.782595606543999	0.0577630112324218	45	1	0	0	0	0	0	0	0	0	4.42	6.18	A	11.9883333333333	4.51029859226939	8.6	4.50637410872013	0.044100434075083
Lcl-038	nsr+ nis-	Lactococcus	lactis	lactis	15	LA	1.98	0.27	5.689	16.881	11.19	3.46277777777778	14.4886666666667	11.1003333333333	0.782595606543999	0.0577630112324218	45	1	0	0	0	0	0	0	0	0	4.42	6.18	A	12.0883333333333	6.33191699332179	8.7	6.28541514039589	0.94215773133356
Lcl-038	nsr+ nis-	Lactococcus	lactis	lactis	15	LA	1.98	0.27	5.689	16.881	11.19	3.46277777777778	14.4886666666667	11.1003333333333	0.782595606543999	0.0577630112324218	45	1	0	0	0	0	0	0	0	0	4.42	6.18	A	12.0883333333333	4.50623821669158	8.7	4.50231373314232	0.0420507624529335
Lcl-038	nsr+ nis-	Lactococcus	lactis	lactis	15	LA	1.98	0.27	5.689	16.881	11.19	3.46277777777778	14.4886666666667	11.1003333333333	0.782595606543999	0.0577630112324218	45	1	0	0	0	0	0	0	0	0	4.42	6.18	A	12.1883333333333	6.33593630319531	8.8	6.28943445026941	0.944186673048558
Lcl-038	nsr+ nis-	Lactococcus	lactis	lactis	15	LA	1.98	0.27	5.689	16.881	11.19	3.46277777777778	14.4886666666667	11.1003333333333	0.782595606543999	0.0577630112324218	45	1	0	0	0	0	0	0	0	0	4.42	6.18	A	12.1883333333333	4.49485423887662	8.8	4.49092975532736	0.0363041471885742
Lcl-038	nsr+ nis-	Lactococcus	lactis	lactis	15	LA	1.98	0.27	5.689	16.881	11.19	3.46277777777778	14.4886666666667	11.1003333333333	0.782595606543999	0.0577630112324218	45	1	0	0	0	0	0	0	0	0	4.42	6.18	A	12.2883333333333	6.33593630319531	8.9	6.28943445026941	0.944186673048558
Lcl-038	nsr+ nis-	Lactococcus	lactis	lactis	15	LA	1.98	0.27	5.689	16.881	11.19	3.46277777777778	14.4886666666667	11.1003333333333	0.782595606543999	0.0577630112324218	45	1	0	0	0	0	0	0	0	0	4.42	6.18	A	12.2883333333333	4.49566219419514	8.9	4.49173771064588	0.0367120018455113
Lcl-038	nsr+ nis-	Lactococcus	lactis	lactis	15	LA	1.98	0.27	5.689	16.881	11.19	3.46277777777778	14.4886666666667	11.1003333333333	0.782595606543999	0.0577630112324218	45	1	0	0	0	0	0	0	0	0	4.42	6.18	A	12.3883333333333	6.32764405697029	9	6.28114220404439	0.940000759345359
Lcl-038	nsr+ nis-	Lactococcus	lactis	lactis	15	LA	1.98	0.27	5.689	16.881	11.19	3.46277777777778	14.4886666666667	11.1003333333333	0.782595606543999	0.0577630112324218	45	1	0	0	0	0	0	0	0	0	4.42	6.18	A	12.3883333333333	4.48427821638018	9	4.48035373283092	0.0309653865811524
Lcl-038	nsr+ nis-	Lactococcus	lactis	lactis	15	LA	1.98	0.27	5.689	16.881	11.19	3.46277777777778	14.4886666666667	11.1003333333333	0.782595606543999	0.0577630112324218	45	1	0	0	0	0	0	0	0	0	4.42	6.18	A	12.4883333333333	6.32149691033787	9.1	6.27499505741197	0.936897688762797
Lcl-038	nsr+ nis-	Lactococcus	lactis	lactis	15	LA	1.98	0.27	5.689	16.881	11.19	3.46277777777778	14.4886666666667	11.1003333333333	0.782595606543999	0.0577630112324218	45	1	0	0	0	0	0	0	0	0	4.42	6.18	A	12.4883333333333	4.47289423856523	9.1	4.46896975501597	0.0252187713167931
Lcl-038	nsr+ nis-	Lactococcus	lactis	lactis	15	LA	1.98	0.27	5.689	16.881	11.19	3.46277777777778	14.4886666666667	11.1003333333333	0.782595606543999	0.0577630112324218	45	1	0	0	0	0	0	0	0	0	4.42	6.18	A	12.5886666666667	6.32123089590674	9.20033333333333	6.27472904298084	0.936763405069053
Lcl-038	nsr+ nis-	Lactococcus	lactis	lactis	15	LA	1.98	0.27	5.689	16.881	11.19	3.46277777777778	14.4886666666667	11.1003333333333	0.782595606543999	0.0577630112324218	45	1	0	0	0	0	0	0	0	0	4.42	6.18	A	12.5886666666667	4.47289423856523	9.20033333333333	4.46896975501597	0.0252187713167931
Lcl-038	nsr+ nis-	Lactococcus	lactis	lactis	15	LA	1.98	0.27	5.689	16.881	11.19	3.46277777777778	14.4886666666667	11.1003333333333	0.782595606543999	0.0577630112324218	45	1	0	0	0	0	0	0	0	0	4.42	6.18	A	12.6886666666667	6.30471134704053	9.30033333333333	6.25820949411463	0.928424361088299
Lcl-038	nsr+ nis-	Lactococcus	lactis	lactis	15	LA	1.98	0.27	5.689	16.881	11.19	3.46277777777778	14.4886666666667	11.1003333333333	0.782595606543999	0.0577630112324218	45	1	0	0	0	0	0	0	0	0	4.42	6.18	A	12.6886666666667	4.47700647408622	9.30033333333333	4.47308199053696	0.0272946217620166
Lcl-038	nsr+ nis-	Lactococcus	lactis	lactis	15	LA	1.98	0.27	5.689	16.881	11.19	3.46277777777778	14.4886666666667	11.1003333333333	0.782595606543999	0.0577630112324218	45	1	0	0	0	0	0	0	0	0	4.42	6.18	A	12.7886666666667	6.29856420040811	9.40033333333333	6.25206234748221	0.925321290505738
Lcl-038	nsr+ nis-	Lactococcus	lactis	lactis	15	LA	1.98	0.27	5.689	16.881	11.19	3.46277777777778	14.4886666666667	11.1003333333333	0.782595606543999	0.0577630112324218	45	1	0	0	0	0	0	0	0	0	4.42	6.18	A	12.7886666666667	4.47294609850841	9.40033333333333	4.46902161495915	0.0252449501398671
Lcl-038	nsr+ nis-	Lactococcus	lactis	lactis	15	LA	1.98	0.27	5.689	16.881	11.19	3.46277777777778	14.4886666666667	11.1003333333333	0.782595606543999	0.0577630112324218	45	1	0	0	0	0	0	0	0	0	4.42	6.18	A	12.8883333333333	6.29033689776693	9.5	6.24383504484103	0.921168160228182
Lcl-038	nsr+ nis-	Lactococcus	lactis	lactis	15	LA	1.98	0.27	5.689	16.881	11.19	3.46277777777778	14.4886666666667	11.1003333333333	0.782595606543999	0.0577630112324218	45	1	0	0	0	0	0	0	0	0	4.42	6.18	A	12.8883333333333	4.4770583340294	9.5	4.47313385048014	0.0273208005850906
Lcl-038	nsr+ nis-	Lactococcus	lactis	lactis	15	LA	1.98	0.27	5.689	16.881	11.19	3.46277777777778	14.4886666666667	11.1003333333333	0.782595606543999	0.0577630112324218	45	1	0	0	0	0	0	0	0	0	4.42	6.18	A	12.9883333333333	6.28369610865903	9.6	6.23719425573313	0.917815899649744
Lcl-038	nsr+ nis-	Lactococcus	lactis	lactis	15	LA	1.98	0.27	5.689	16.881	11.19	3.46277777777778	14.4886666666667	11.1003333333333	0.782595606543999	0.0577630112324218	45	1	0	0	0	0	0	0	0	0	4.42	6.18	A	12.9883333333333	4.4811705695504	9.6	4.47724608600114	0.029396651030314
Lcl-038	nsr+ nis-	Lactococcus	lactis	lactis	15	LA	1.98	0.27	5.689	16.881	11.19	3.46277777777778	14.4886666666667	11.1003333333333	0.782595606543999	0.0577630112324218	45	1	0	0	0	0	0	0	0	0	4.42	6.18	A	13.0886666666667	6.2791854217808	9.70033333333333	6.2326835688549	0.915538911545192
Lcl-038	nsr+ nis-	Lactococcus	lactis	lactis	15	LA	1.98	0.27	5.689	16.881	11.19	3.46277777777778	14.4886666666667	11.1003333333333	0.782595606543999	0.0577630112324218	45	1	0	0	0	0	0	0	0	0	4.42	6.18	A	13.0886666666667	4.4811705695504	9.70033333333333	4.47724608600114	0.029396651030314
Lcl-038	nsr+ nis-	Lactococcus	lactis	lactis	15	LA	1.98	0.27	5.689	16.881	11.19	3.46277777777778	14.4886666666667	11.1003333333333	0.782595606543999	0.0577630112324218	45	1	0	0	0	0	0	0	0	0	4.42	6.18	A	13.1886666666667	6.28077193531407	9.80033333333333	6.23427008238817	0.916339781244308
Lcl-038	nsr+ nis-	Lactococcus	lactis	lactis	15	LA	1.98	0.27	5.689	16.881	11.19	3.46277777777778	14.4886666666667	11.1003333333333	0.782595606543999	0.0577630112324218	45	1	0	0	0	0	0	0	0	0	4.42	6.18	A	13.1886666666667	4.4811705695504	9.80033333333333	4.47724608600114	0.029396651030314
Lcl-038	nsr+ nis-	Lactococcus	lactis	lactis	15	LA	1.98	0.27	5.689	16.881	11.19	3.46277777777778	14.4886666666667	11.1003333333333	0.782595606543999	0.0577630112324218	45	1	0	0	0	0	0	0	0	0	4.42	6.18	A	13.2886666666667	6.27413114620617	9.90033333333333	6.22762929328027	0.912987520665869
Lcl-038	nsr+ nis-	Lactococcus	lactis	lactis	15	LA	1.98	0.27	5.689	16.881	11.19	3.46277777777778	14.4886666666667	11.1003333333333	0.782595606543999	0.0577630112324218	45	1	0	0	0	0	0	0	0	0	4.42	6.18	A	13.2886666666667	4.48844231184436	9.90033333333333	4.4845178282951	0.0330674158494499
Lcl-038	nsr+ nis-	Lactococcus	lactis	lactis	15	LA	1.98	0.27	5.689	16.881	11.19	3.46277777777778	14.4886666666667	11.1003333333333	0.782595606543999	0.0577630112324218	45	1	0	0	0	0	0	0	0	0	4.42	6.18	A	13.3886666666667	6.27571765973944	10.0003333333333	6.22921580681354	0.913788390364986
Lcl-038	nsr+ nis-	Lactococcus	lactis	lactis	15	LA	1.98	0.27	5.689	16.881	11.19	3.46277777777778	14.4886666666667	11.1003333333333	0.782595606543999	0.0577630112324218	45	1	0	0	0	0	0	0	0	0	4.42	6.18	A	13.3886666666667	4.49250268742217	10.0003333333333	4.48857820387291	0.0351170874715993
Lcl-038	nsr+ nis-	Lactococcus	lactis	lactis	15	LA	1.98	0.27	5.689	16.881	11.19	3.46277777777778	14.4886666666667	11.1003333333333	0.782595606543999	0.0577630112324218	45	1	0	0	0	0	0	0	0	0	4.42	6.18	A	13.4886666666667	6.27571765973944	10.1003333333333	6.22921580681354	0.913788390364986
Lcl-038	nsr+ nis-	Lactococcus	lactis	lactis	15	LA	1.98	0.27	5.689	16.881	11.19	3.46277777777778	14.4886666666667	11.1003333333333	0.782595606543999	0.0577630112324218	45	1	0	0	0	0	0	0	0	0	4.42	6.18	A	13.4886666666667	4.48506291687928	10.1003333333333	4.48113843333003	0.0313615022394397
Lcl-038	nsr+ nis-	Lactococcus	lactis	lactis	15	LA	1.98	0.27	5.689	16.881	11.19	3.46277777777778	14.4886666666667	11.1003333333333	0.782595606543999	0.0577630112324218	45	1	0	0	0	0	0	0	0	0	4.42	6.18	A	13.5883333333333	6.27571765973944	10.2	6.22921580681354	0.913788390364986
Lcl-038	nsr+ nis-	Lactococcus	lactis	lactis	15	LA	1.98	0.27	5.689	16.881	11.19	3.46277777777778	14.4886666666667	11.1003333333333	0.782595606543999	0.0577630112324218	45	1	0	0	0	0	0	0	0	0	4.42	6.18	A	13.5883333333333	4.4776231463364	10.2	4.47369866278714	0.0276059170072796
Lcl-038	nsr+ nis-	Lactococcus	lactis	lactis	15	LA	1.98	0.27	5.689	16.881	11.19	3.46277777777778	14.4886666666667	11.1003333333333	0.782595606543999	0.0577630112324218	45	1	0	0	0	0	0	0	0	0	4.42	6.18	A	13.6886666666667	6.27571765973944	10.3003333333333	6.22921580681354	0.913788390364986
Lcl-038	nsr+ nis-	Lactococcus	lactis	lactis	15	LA	1.98	0.27	5.689	16.881	11.19	3.46277777777778	14.4886666666667	11.1003333333333	0.782595606543999	0.0577630112324218	45	1	0	0	0	0	0	0	0	0	4.42	6.18	A	13.6886666666667	4.47018337579351	10.3003333333333	4.46625889224425	0.0238503317751199
Lcl-038	nsr+ nis-	Lactococcus	lactis	lactis	15	LA	1.98	0.27	5.689	16.881	11.19	3.46277777777778	14.4886666666667	11.1003333333333	0.782595606543999	0.0577630112324218	45	1	0	0	0	0	0	0	0	0	4.42	6.18	A	13.7886666666667	6.27571765973944	10.4003333333333	6.22921580681354	0.913788390364986
Lcl-038	nsr+ nis-	Lactococcus	lactis	lactis	15	LA	1.98	0.27	5.689	16.881	11.19	3.46277777777778	14.4886666666667	11.1003333333333	0.782595606543999	0.0577630112324218	45	1	0	0	0	0	0	0	0	0	4.42	6.18	A	13.7886666666667	4.45547186295666	10.4003333333333	4.45154737940741	0.0164239817238244
Lcl-038	nsr+ nis-	Lactococcus	lactis	lactis	15	LA	1.98	0.27	5.689	16.881	11.19	3.46277777777778	14.4886666666667	11.1003333333333	0.782595606543999	0.0577630112324218	45	1	0	0	0	0	0	0	0	0	4.42	6.18	A	13.8886666666667	6.27571765973944	10.5003333333333	6.22921580681354	0.913788390364986
Lcl-038	nsr+ nis-	Lactococcus	lactis	lactis	15	LA	1.98	0.27	5.689	16.881	11.19	3.46277777777778	14.4886666666667	11.1003333333333	0.782595606543999	0.0577630112324218	45	1	0	0	0	0	0	0	0	0	4.42	6.18	A	13.8886666666667	4.45466390763815	10.5003333333333	4.45073942408889	0.0160161270668868
Lcl-038	nsr+ nis-	Lactococcus	lactis	lactis	15	LA	1.98	0.27	5.689	16.881	11.19	3.46277777777778	14.4886666666667	11.1003333333333	0.782595606543999	0.0577630112324218	45	1	0	0	0	0	0	0	0	0	4.42	6.18	A	13.9886666666667	6.27783755294353	10.6003333333333	6.23133570001763	0.914858509337763
Lcl-038	nsr+ nis-	Lactococcus	lactis	lactis	15	LA	1.98	0.27	5.689	16.881	11.19	3.46277777777778	14.4886666666667	11.1003333333333	0.782595606543999	0.0577630112324218	45	1	0	0	0	0	0	0	0	0	4.42	6.18	A	13.9886666666667	4.45881806762264	10.6003333333333	4.45489358407338	0.0181131409196476
Lcl-038	nsr+ nis-	Lactococcus	lactis	lactis	15	LA	1.98	0.27	5.689	16.881	11.19	3.46277777777778	14.4886666666667	11.1003333333333	0.782595606543999	0.0577630112324218	45	1	0	0	0	0	0	0	0	0	4.42	6.18	A	14.0883333333333	6.27995744614763	10.7	6.23345559322173	0.915928628310539
Lcl-038	nsr+ nis-	Lactococcus	lactis	lactis	15	LA	1.98	0.27	5.689	16.881	11.19	3.46277777777778	14.4886666666667	11.1003333333333	0.782595606543999	0.0577630112324218	45	1	0	0	0	0	0	0	0	0	4.42	6.18	A	14.0883333333333	4.45881806762264	10.7	4.45489358407338	0.0181131409196476
Lcl-038	nsr+ nis-	Lactococcus	lactis	lactis	15	LA	1.98	0.27	5.689	16.881	11.19	3.46277777777778	14.4886666666667	11.1003333333333	0.782595606543999	0.0577630112324218	45	1	0	0	0	0	0	0	0	0	4.42	6.18	A	14.1883333333333	6.27179405858368	10.8	6.22529220565778	0.911807762270004
Lcl-038	nsr+ nis-	Lactococcus	lactis	lactis	15	LA	1.98	0.27	5.689	16.881	11.19	3.46277777777778	14.4886666666667	11.1003333333333	0.782595606543999	0.0577630112324218	45	1	0	0	0	0	0	0	0	0	4.42	6.18	A	14.1883333333333	4.45881806762264	10.8	4.45489358407338	0.0181131409196476
Lcl-038	nsr+ nis-	Lactococcus	lactis	lactis	15	LA	1.98	0.27	5.689	16.881	11.19	3.46277777777778	14.4886666666667	11.1003333333333	0.782595606543999	0.0577630112324218	45	1	0	0	0	0	0	0	0	0	4.42	6.18	A	14.2883333333333	6.26363067101973	10.9	6.21712881809383	0.90768689622947
Lcl-038	nsr+ nis-	Lactococcus	lactis	lactis	15	LA	1.98	0.27	5.689	16.881	11.19	3.46277777777778	14.4886666666667	11.1003333333333	0.782595606543999	0.0577630112324218	45	1	0	0	0	0	0	0	0	0	4.42	6.18	A	14.2883333333333	4.46214560264453	10.9	4.45822111909528	0.0197928757065838
Lcl-038	nsr+ nis-	Lactococcus	lactis	lactis	15	LA	1.98	0.27	5.689	16.881	11.19	3.46277777777778	14.4886666666667	11.1003333333333	0.782595606543999	0.0577630112324218	45	1	0	0	0	0	0	0	0	0	4.42	6.18	A	14.3883333333333	6.26575056422383	11	6.21924871129793	0.908757015202247
Lcl-038	nsr+ nis-	Lactococcus	lactis	lactis	15	LA	1.98	0.27	5.689	16.881	11.19	3.46277777777778	14.4886666666667	11.1003333333333	0.782595606543999	0.0577630112324218	45	1	0	0	0	0	0	0	0	0	4.42	6.18	A	14.3883333333333	4.45145341184235	11	4.44752892829309	0.0143954735092118
Lcl-038	nsr+ nis-	Lactococcus	lactis	lactis	15	LA	1.98	0.27	5.689	16.881	11.19	3.46277777777778	14.4886666666667	11.1003333333333	0.782595606543999	0.0577630112324218	45	1	0	0	0	0	0	0	0	0	4.42	6.18	A	14.4886666666667	6.2570406072622	11.1003333333333	6.2105387543363	0.904360241733323
Lcl-038	nsr+ nis-	Lactococcus	lactis	lactis	15	LA	1.98	0.27	5.689	16.881	11.19	3.46277777777778	14.4886666666667	11.1003333333333	0.782595606543999	0.0577630112324218	45	1	0	0	0	0	0	0	0	0	4.42	6.18	A	14.4886666666667	4.44729925185786	11.1003333333333	4.4433747683086	0.012298459656451
Lcl-038	nsr+ nis-	Lactococcus	lactis	lactis	15	LA	1.98	0.27	5.689	16.881	11.19	3.46277777777778	14.4886666666667	11.1003333333333	0.782595606543999	0.0577630112324218	45	1	0	0	0	0	0	0	0	0	4.42	6.18	A	14.5886666666667	6.24833065030057	11.2003333333333	6.20182879737467	0.899963468264399
Lcl-038	nsr+ nis-	Lactococcus	lactis	lactis	15	LA	1.98	0.27	5.689	16.881	11.19	3.46277777777778	14.4886666666667	11.1003333333333	0.782595606543999	0.0577630112324218	45	1	0	0	0	0	0	0	0	0	4.42	6.18	A	14.5886666666667	4.45145341184235	11.2003333333333	4.44752892829309	0.0143954735092118
Lcl-038	nsr+ nis-	Lactococcus	lactis	lactis	15	LA	1.98	0.27	5.689	16.881	11.19	3.46277777777778	14.4886666666667	11.1003333333333	0.782595606543999	0.0577630112324218	45	1	0	0	0	0	0	0	0	0	4.42	6.18	A	14.6888333333333	6.24990397410698	11.3005	6.20340212118108	0.900757679808786
Lcl-038	nsr+ nis-	Lactococcus	lactis	lactis	15	LA	1.98	0.27	5.689	16.881	11.19	3.46277777777778	14.4886666666667	11.1003333333333	0.782595606543999	0.0577630112324218	45	1	0	0	0	0	0	0	0	0	4.42	6.18	A	14.6888333333333	4.45889318238524	11.3005	4.45496869883598	0.0181510587413715
Lcl-038	nsr+ nis-	Lactococcus	lactis	lactis	15	LA	1.98	0.27	5.689	16.881	11.19	3.46277777777778	14.4886666666667	11.1003333333333	0.782595606543999	0.0577630112324218	45	1	0	0	0	0	0	0	0	0	4.42	6.18	A	14.7883333333333	6.24494425282821	11.4	6.19844239990231	0.898254019799005
Lcl-038	nsr+ nis-	Lactococcus	lactis	lactis	15	LA	1.98	0.27	5.689	16.881	11.19	3.46277777777778	14.4886666666667	11.1003333333333	0.782595606543999	0.0577630112324218	45	1	0	0	0	0	0	0	0	0	4.42	6.18	A	14.7883333333333	4.45556564736334	11.4	4.45164116381409	0.0164713239544353
Lcl-038	nsr+ nis-	Lactococcus	lactis	lactis	15	LA	1.98	0.27	5.689	16.881	11.19	3.46277777777778	14.4886666666667	11.1003333333333	0.782595606543999	0.0577630112324218	45	1	0	0	0	0	0	0	0	0	4.42	6.18	A	14.8883333333333	6.2297012507814	11.5	6.1831993978555	0.890559374775913
Lcl-038	nsr+ nis-	Lactococcus	lactis	lactis	15	LA	1.98	0.27	5.689	16.881	11.19	3.46277777777778	14.4886666666667	11.1003333333333	0.782595606543999	0.0577630112324218	45	1	0	0	0	0	0	0	0	0	4.42	6.18	A	14.8883333333333	4.45889318238524	11.5	4.45496869883598	0.0181510587413715
Lcl-038	nsr+ nis-	Lactococcus	lactis	lactis	15	LA	1.98	0.27	5.689	16.881	11.19	3.46277777777778	14.4886666666667	11.1003333333333	0.782595606543999	0.0577630112324218	45	1	0	0	0	0	0	0	0	0	4.42	6.18	A	14.9883333333333	6.22316820569622	11.6	6.17666635277032	0.887261503221744
Lcl-038	nsr+ nis-	Lactococcus	lactis	lactis	15	LA	1.98	0.27	5.689	16.881	11.19	3.46277777777778	14.4886666666667	11.1003333333333	0.782595606543999	0.0577630112324218	45	1	0	0	0	0	0	0	0	0	4.42	6.18	A	14.9883333333333	4.45889318238524	11.6	4.45496869883598	0.0181510587413715
Lcl-038	nsr+ nis-	Lactococcus	lactis	lactis	15	LA	1.98	0.27	5.689	16.881	11.19	3.46277777777778	14.4886666666667	11.1003333333333	0.782595606543999	0.0577630112324218	45	1	0	0	0	0	0	0	0	0	4.42	6.18	A	15.0883333333333	6.21507622431117	11.7	6.16857437138527	0.883176682915332
Lcl-038	nsr+ nis-	Lactococcus	lactis	lactis	15	LA	1.98	0.27	5.689	16.881	11.19	3.46277777777778	14.4886666666667	11.1003333333333	0.782595606543999	0.0577630112324218	45	1	0	0	0	0	0	0	0	0	4.42	6.18	A	15.0883333333333	4.45806655742263	11.7	4.45414207387338	0.0177337796755473
Lcl-038	nsr+ nis-	Lactococcus	lactis	lactis	15	LA	1.98	0.27	5.689	16.881	11.19	3.46277777777778	14.4886666666667	11.1003333333333	0.782595606543999	0.0577630112324218	45	1	0	0	0	0	0	0	0	0	4.42	6.18	A	15.1883333333333	6.21691592649097	11.8	6.17041407356507	0.884105361870981
Lcl-038	nsr+ nis-	Lactococcus	lactis	lactis	15	LA	1.98	0.27	5.689	16.881	11.19	3.46277777777778	14.4886666666667	11.1003333333333	0.782595606543999	0.0577630112324218	45	1	0	0	0	0	0	0	0	0	4.42	6.18	A	15.1883333333333	4.44641967285604	11.8	4.44249518930678	0.0118544494694843
Lcl-038	nsr+ nis-	Lactococcus	lactis	lactis	15	LA	1.98	0.27	5.689	16.881	11.19	3.46277777777778	14.4886666666667	11.1003333333333	0.782595606543999	0.0577630112324218	45	1	0	0	0	0	0	0	0	0	4.42	6.18	A	15.2883333333333	6.21691592649097	11.9	6.17041407356507	0.884105361870981
Lcl-038	nsr+ nis-	Lactococcus	lactis	lactis	15	LA	1.98	0.27	5.689	16.881	11.19	3.46277777777778	14.4886666666667	11.1003333333333	0.782595606543999	0.0577630112324218	45	1	0	0	0	0	0	0	0	0	4.42	6.18	A	15.2883333333333	4.44974720787793	11.9	4.44582272432867	0.0135341842564209
Lcl-038	nsr+ nis-	Lactococcus	lactis	lactis	15	LA	1.98	0.27	5.689	16.881	11.19	3.46277777777778	14.4886666666667	11.1003333333333	0.782595606543999	0.0577630112324218	45	1	0	0	0	0	0	0	0	0	4.42	6.18	A	15.3883333333333	6.22344897157615	12	6.17694711865025	0.88740323342515
Lcl-038	nsr+ nis-	Lactococcus	lactis	lactis	15	LA	1.98	0.27	5.689	16.881	11.19	3.46277777777778	14.4886666666667	11.1003333333333	0.782595606543999	0.0577630112324218	45	1	0	0	0	0	0	0	0	0	4.42	6.18	A	15.3883333333333	4.44641967285604	12	4.44249518930678	0.0118544494694843
Lcl-038	nsr+ nis-	Lactococcus	lactis	lactis	15	LA	1.98	0.27	5.689	16.881	11.19	3.46277777777778	14.4886666666667	11.1003333333333	0.782595606543999	0.0577630112324218	45	1	0	0	0	0	0	0	0	0	4.42	6.18	A	15.4883333333333	6.22840869285491	12.1	6.18190683992901	0.889906893434931
Lcl-038	nsr+ nis-	Lactococcus	lactis	lactis	15	LA	1.98	0.27	5.689	16.881	11.19	3.46277777777778	14.4886666666667	11.1003333333333	0.782595606543999	0.0577630112324218	45	1	0	0	0	0	0	0	0	0	4.42	6.18	A	15.4883333333333	4.44974720787793	12.1	4.44582272432867	0.0135341842564209
Lcl-038	nsr+ nis-	Lactococcus	lactis	lactis	15	LA	1.98	0.27	5.689	16.881	11.19	3.46277777777778	14.4886666666667	11.1003333333333	0.782595606543999	0.0577630112324218	45	1	0	0	0	0	0	0	0	0	4.42	6.18	A	15.5883333333333	6.23492735043356	12.2	6.18842549750766	0.893197502196956
Lcl-038	nsr+ nis-	Lactococcus	lactis	lactis	15	LA	1.98	0.27	5.689	16.881	11.19	3.46277777777778	14.4886666666667	11.1003333333333	0.782595606543999	0.0577630112324218	45	1	0	0	0	0	0	0	0	0	4.42	6.18	A	15.5883333333333	4.44641967285604	12.2	4.44249518930678	0.0118544494694843
Lcl-038	nsr+ nis-	Lactococcus	lactis	lactis	15	LA	1.98	0.27	5.689	16.881	11.19	3.46277777777778	14.4886666666667	11.1003333333333	0.782595606543999	0.0577630112324218	45	1	0	0	0	0	0	0	0	0	4.42	6.18	A	15.6886666666667	6.23308764825376	12.3003333333333	6.18658579532786	0.892268823241306
Lcl-038	nsr+ nis-	Lactococcus	lactis	lactis	15	LA	1.98	0.27	5.689	16.881	11.19	3.46277777777778	14.4886666666667	11.1003333333333	0.782595606543999	0.0577630112324218	45	1	0	0	0	0	0	0	0	0	4.42	6.18	A	15.6886666666667	4.44641967285604	12.3003333333333	4.44249518930678	0.0118544494694843
Lcl-038	nsr+ nis-	Lactococcus	lactis	lactis	15	LA	1.98	0.27	5.689	16.881	11.19	3.46277777777778	14.4886666666667	11.1003333333333	0.782595606543999	0.0577630112324218	45	1	0	0	0	0	0	0	0	0	4.42	6.18	A	15.7886666666667	6.23308764825376	12.4003333333333	6.18658579532786	0.892268823241306
Lcl-038	nsr+ nis-	Lactococcus	lactis	lactis	15	LA	1.98	0.27	5.689	16.881	11.19	3.46277777777778	14.4886666666667	11.1003333333333	0.782595606543999	0.0577630112324218	45	1	0	0	0	0	0	0	0	0	4.42	6.18	A	15.7886666666667	4.43888502381044	12.4003333333333	4.43496054026118	0.0080509697086451
Lcl-038	nsr+ nis-	Lactococcus	lactis	lactis	15	LA	1.98	0.27	5.689	16.881	11.19	3.46277777777778	14.4886666666667	11.1003333333333	0.782595606543999	0.0577630112324218	45	1	0	0	0	0	0	0	0	0	4.42	6.18	A	15.8883333333333	6.22655460316858	12.5	6.18005275024268	0.888970951687137
Lcl-038	nsr+ nis-	Lactococcus	lactis	lactis	15	LA	1.98	0.27	5.689	16.881	11.19	3.46277777777778	14.4886666666667	11.1003333333333	0.782595606543999	0.0577630112324218	45	1	0	0	0	0	0	0	0	0	4.42	6.18	A	15.8883333333333	4.44221255883233	12.5	4.43828807528307	0.0097307044955813
Lcl-038	nsr+ nis-	Lactococcus	lactis	lactis	15	LA	1.98	0.27	5.689	16.881	11.19	3.46277777777778	14.4886666666667	11.1003333333333	0.782595606543999	0.0577630112324218	45	1	0	0	0	0	0	0	0	0	4.42	6.18	A	15.9883333333333	6.21332223971859	12.6	6.16682038679269	0.882291274071693
Lcl-038	nsr+ nis-	Lactococcus	lactis	lactis	15	LA	1.98	0.27	5.689	16.881	11.19	3.46277777777778	14.4886666666667	11.1003333333333	0.782595606543999	0.0577630112324218	45	1	0	0	0	0	0	0	0	0	4.42	6.18	A	15.9883333333333	4.43467790978673	12.6	4.43075342623748	0.00592722473474213
Lcl-038	nsr+ nis-	Lactococcus	lactis	lactis	15	LA	1.98	0.27	5.689	16.881	11.19	3.46277777777778	14.4886666666667	11.1003333333333	0.782595606543999	0.0577630112324218	45	1	0	0	0	0	0	0	0	0	4.42	6.18	A	16.0883333333333	6.20836251843982	12.7	6.16186066551392	0.879787614061912
Lcl-038	nsr+ nis-	Lactococcus	lactis	lactis	15	LA	1.98	0.27	5.689	16.881	11.19	3.46277777777778	14.4886666666667	11.1003333333333	0.782595606543999	0.0577630112324218	45	1	0	0	0	0	0	0	0	0	4.42	6.18	A	16.0883333333333	4.43800544480863	12.7	4.43408096125937	0.00760695952167834
Lcl-038	nsr+ nis-	Lactococcus	lactis	lactis	15	LA	1.98	0.27	5.689	16.881	11.19	3.46277777777778	14.4886666666667	11.1003333333333	0.782595606543999	0.0577630112324218	45	1	0	0	0	0	0	0	0	0	4.42	6.18	A	16.1883333333333	6.20182947335464	12.8	6.15532762042874	0.876489742507743
Lcl-038	nsr+ nis-	Lactococcus	lactis	lactis	15	LA	1.98	0.27	5.689	16.881	11.19	3.46277777777778	14.4886666666667	11.1003333333333	0.782595606543999	0.0577630112324218	45	1	0	0	0	0	0	0	0	0	4.42	6.18	A	16.1883333333333	4.44554009385423	12.8	4.44161561030497	0.011410439282518
Lcl-038	nsr+ nis-	Lactococcus	lactis	lactis	15	LA	1.98	0.27	5.689	16.881	11.19	3.46277777777778	14.4886666666667	11.1003333333333	0.782595606543999	0.0577630112324218	45	1	0	0	0	0	0	0	0	0	4.42	6.18	A	16.2883333333333	6.20182947335464	12.9	6.15532762042874	0.876489742507743
Lcl-038	nsr+ nis-	Lactococcus	lactis	lactis	15	LA	1.98	0.27	5.689	16.881	11.19	3.46277777777778	14.4886666666667	11.1003333333333	0.782595606543999	0.0577630112324218	45	1	0	0	0	0	0	0	0	0	4.42	6.18	A	16.2883333333333	4.44554009385423	12.9	4.44161561030497	0.011410439282518
Lcl-038	nsr+ nis-	Lactococcus	lactis	lactis	15	LA	1.98	0.27	5.689	16.881	11.19	3.46277777777778	14.4886666666667	11.1003333333333	0.782595606543999	0.0577630112324218	45	1	0	0	0	0	0	0	0	0	4.42	6.18	A	16.3883333333333	6.20027053705476	13	6.15376868412887	0.8757027937555
Lcl-038	nsr+ nis-	Lactococcus	lactis	lactis	15	LA	1.98	0.27	5.689	16.881	11.19	3.46277777777778	14.4886666666667	11.1003333333333	0.782595606543999	0.0577630112324218	45	1	0	0	0	0	0	0	0	0	4.42	6.18	A	16.3883333333333	4.43800544480863	13	4.43408096125937	0.00760695952167834
Lcl-038	nsr+ nis-	Lactococcus	lactis	lactis	15	LA	1.98	0.27	5.689	16.881	11.19	3.46277777777778	14.4886666666667	11.1003333333333	0.782595606543999	0.0577630112324218	45	1	0	0	0	0	0	0	0	0	4.42	6.18	A	16.4883333333333	6.20854317922599	13.1	6.16204132630009	0.879878811361164
Lcl-038	nsr+ nis-	Lactococcus	lactis	lactis	15	LA	1.98	0.27	5.689	16.881	11.19	3.46277777777778	14.4886666666667	11.1003333333333	0.782595606543999	0.0577630112324218	45	1	0	0	0	0	0	0	0	0	4.42	6.18	A	16.4883333333333	4.43800544480863	13.1	4.43408096125937	0.00760695952167834
Lcl-038	nsr+ nis-	Lactococcus	lactis	lactis	15	LA	1.98	0.27	5.689	16.881	11.19	3.46277777777778	14.4886666666667	11.1003333333333	0.782595606543999	0.0577630112324218	45	1	0	0	0	0	0	0	0	0	4.42	6.18	A	16.5888333333333	6.20698424292611	13.2005	6.16048239000021	0.87909186260892
Lcl-038	nsr+ nis-	Lactococcus	lactis	lactis	15	LA	1.98	0.27	5.689	16.881	11.19	3.46277777777778	14.4886666666667	11.1003333333333	0.782595606543999	0.0577630112324218	45	1	0	0	0	0	0	0	0	0	4.42	6.18	A	16.5888333333333	4.43047079576303	13.2005	4.42654631221377	0.00380347976083917
Lcl-038	nsr+ nis-	Lactococcus	lactis	lactis	15	LA	1.98	0.27	5.689	16.881	11.19	3.46277777777778	14.4886666666667	11.1003333333333	0.782595606543999	0.0577630112324218	45	1	0	0	0	0	0	0	0	0	4.42	6.18	A	16.6883333333333	6.20542530662623	13.3	6.15892345370033	0.878304913856677
Lcl-038	nsr+ nis-	Lactococcus	lactis	lactis	15	LA	1.98	0.27	5.689	16.881	11.19	3.46277777777778	14.4886666666667	11.1003333333333	0.782595606543999	0.0577630112324218	45	1	0	0	0	0	0	0	0	0	4.42	6.18	A	16.6883333333333	4.42293614671743	13.3	4.41901166316817	0
Lcl-038	nsr+ nis-	Lactococcus	lactis	lactis	15	LA	1.98	0.27	5.689	16.881	11.19	3.46277777777778	14.4886666666667	11.1003333333333	0.782595606543999	0.0577630112324218	45	1	0	0	0	0	0	0	0	0	4.42	6.18	A	16.7883333333333	6.19715266445501	13.4	6.15065081152911	0.874128896251014
Lcl-038	nsr+ nis-	Lactococcus	lactis	lactis	15	LA	1.98	0.27	5.689	16.881	11.19	3.46277777777778	14.4886666666667	11.1003333333333	0.782595606543999	0.0577630112324218	45	1	0	0	0	0	0	0	0	0	4.42	6.18	A	16.7883333333333	4.43047079576303	13.4	4.42654631221377	0.00380347976083917
Lcl-038	nsr+ nis-	Lactococcus	lactis	lactis	15	LA	1.98	0.27	5.689	16.881	11.19	3.46277777777778	14.4886666666667	11.1003333333333	0.782595606543999	0.0577630112324218	45	1	0	0	0	0	0	0	0	0	4.42	6.18	A	16.8883333333333	6.19043895858366	13.5	6.14393710565776	0.870739827397593
Lcl-038	nsr+ nis-	Lactococcus	lactis	lactis	15	LA	1.98	0.27	5.689	16.881	11.19	3.46277777777778	14.4886666666667	11.1003333333333	0.782595606543999	0.0577630112324218	45	1	0	0	0	0	0	0	0	0	4.42	6.18	A	16.8883333333333	4.43047079576303	13.5	4.42654631221377	0.00380347976083917
Lcl-038	nsr+ nis-	Lactococcus	lactis	lactis	15	LA	1.98	0.27	5.689	16.881	11.19	3.46277777777778	14.4886666666667	11.1003333333333	0.782595606543999	0.0577630112324218	45	1	0	0	0	0	0	0	0	0	4.42	6.18	A	16.9883333333333	6.19881170584864	13.6	6.15230985292274	0.874966377907411
Lcl-038	nsr+ nis-	Lactococcus	lactis	lactis	15	LA	1.98	0.27	5.689	16.881	11.19	3.46277777777778	14.4886666666667	11.1003333333333	0.782595606543999	0.0577630112324218	45	1	0	0	0	0	0	0	0	0	4.42	6.18	A	16.9883333333333	4.43047079576303	13.6	4.42654631221377	0.00380347976083917
Lcl-038	nsr+ nis-	Lactococcus	lactis	lactis	15	LA	1.98	0.27	5.689	16.881	11.19	3.46277777777778	14.4886666666667	11.1003333333333	0.782595606543999	0.0577630112324218	45	1	0	0	0	0	0	0	0	0	4.42	6.18	A	17.0888333333333	6.19881170584864	13.7005	6.15230985292274	0.874966377907411
Lcl-038	nsr+ nis-	Lactococcus	lactis	lactis	15	LA	1.98	0.27	5.689	16.881	11.19	3.46277777777778	14.4886666666667	11.1003333333333	0.782595606543999	0.0577630112324218	45	1	0	0	0	0	0	0	0	0	4.42	6.18	A	17.0888333333333	4.43467790978673	13.7005	4.43075342623748	0.00592722473474213
Lcl-038	nsr+ nis-	Lactococcus	lactis	lactis	15	LA	1.98	0.27	5.689	16.881	11.19	3.46277777777778	14.4886666666667	11.1003333333333	0.782595606543999	0.0577630112324218	45	1	0	0	0	0	0	0	0	0	4.42	6.18	A	17.1883333333333	6.1920979999773	13.8	6.1455961470514	0.871577309053991
Lcl-038	nsr+ nis-	Lactococcus	lactis	lactis	15	LA	1.98	0.27	5.689	16.881	11.19	3.46277777777778	14.4886666666667	11.1003333333333	0.782595606543999	0.0577630112324218	45	1	0	0	0	0	0	0	0	0	4.42	6.18	A	17.1883333333333	4.43467790978673	13.8	4.43075342623748	0.00592722473474213
Lcl-038	nsr+ nis-	Lactococcus	lactis	lactis	15	LA	1.98	0.27	5.689	16.881	11.19	3.46277777777778	14.4886666666667	11.1003333333333	0.782595606543999	0.0577630112324218	45	1	0	0	0	0	0	0	0	0	4.42	6.18	A	17.2886666666667	6.1920979999773	13.9003333333333	6.1455961470514	0.871577309053991
Lcl-038	nsr+ nis-	Lactococcus	lactis	lactis	15	LA	1.98	0.27	5.689	16.881	11.19	3.46277777777778	14.4886666666667	11.1003333333333	0.782595606543999	0.0577630112324218	45	1	0	0	0	0	0	0	0	0	4.42	6.18	A	17.2886666666667	4.42714326074114	13.9003333333333	4.42321877719188	0.00212374497390297
Lcl-038	nsr+ nis-	Lactococcus	lactis	lactis	15	LA	1.98	0.27	5.689	16.881	11.19	3.46277777777778	14.4886666666667	11.1003333333333	0.782595606543999	0.0577630112324218	45	1	0	0	0	0	0	0	0	0	4.42	6.18	A	17.3886666666667	6.19881170584864	14.0003333333333	6.15230985292274	0.874966377907411
Lcl-038	nsr+ nis-	Lactococcus	lactis	lactis	15	LA	1.98	0.27	5.689	16.881	11.19	3.46277777777778	14.4886666666667	11.1003333333333	0.782595606543999	0.0577630112324218	45	1	0	0	0	0	0	0	0	0	4.42	6.18	A	17.3886666666667	4.43135037476484	14.0003333333333	4.42742589121559	0.00424748994780593
Lcl-038	nsr+ nis-	Lactococcus	lactis	lactis	15	LA	1.98	0.27	5.689	16.881	11.19	3.46277777777778	14.4886666666667	11.1003333333333	0.782595606543999	0.0577630112324218	45	1	0	0	0	0	0	0	0	0	4.42	6.18	A	17.4883333333333	6.18888002228378	14.1	6.14237816935788	0.86995287864535
Lcl-038	nsr+ nis-	Lactococcus	lactis	lactis	15	LA	1.98	0.27	5.689	16.881	11.19	3.46277777777778	14.4886666666667	11.1003333333333	0.782595606543999	0.0577630112324218	45	1	0	0	0	0	0	0	0	0	4.42	6.18	A	17.4883333333333	4.43135037476484	14.1	4.42742589121559	0.00424748994780593
Lcl-038	nsr+ nis-	Lactococcus	lactis	lactis	15	LA	1.98	0.27	5.689	16.881	11.19	3.46277777777778	14.4886666666667	11.1003333333333	0.782595606543999	0.0577630112324218	45	1	0	0	0	0	0	0	0	0	4.42	6.18	A	17.5883333333333	6.18216631641244	14.2	6.13566446348654	0.86656380979193
Lcl-038	nsr+ nis-	Lactococcus	lactis	lactis	15	LA	1.98	0.27	5.689	16.881	11.19	3.46277777777778	14.4886666666667	11.1003333333333	0.782595606543999	0.0577630112324218	45	1	0	0	0	0	0	0	0	0	4.42	6.18	A	17.5883333333333	4.42714326074114	14.2	4.42321877719188	0.00212374497390297
Lcl-038	nsr+ nis-	Lactococcus	lactis	lactis	15	LA	1.98	0.27	5.689	16.881	11.19	3.46277777777778	14.4886666666667	11.1003333333333	0.782595606543999	0.0577630112324218	45	1	0	0	0	0	0	0	0	0	4.42	6.18	A	17.6886666666667	6.18216631641244	14.3003333333333	6.13566446348654	0.86656380979193
Lcl-038	nsr+ nis-	Lactococcus	lactis	lactis	15	LA	1.98	0.27	5.689	16.881	11.19	3.46277777777778	14.4886666666667	11.1003333333333	0.782595606543999	0.0577630112324218	45	1	0	0	0	0	0	0	0	0	4.42	6.18	A	17.6886666666667	4.42714326074114	14.3003333333333	4.42321877719188	0.00212374497390297
Lcl-038	nsr+ nis-	Lactococcus	lactis	lactis	15	LA	1.98	0.27	5.689	16.881	11.19	3.46277777777778	14.4886666666667	11.1003333333333	0.782595606543999	0.0577630112324218	45	1	0	0	0	0	0	0	0	0	4.42	6.18	A	17.7886666666667	6.18216631641244	14.4003333333333	6.13566446348654	0.86656380979193
Lcl-038	nsr+ nis-	Lactococcus	lactis	lactis	15	LA	1.98	0.27	5.689	16.881	11.19	3.46277777777778	14.4886666666667	11.1003333333333	0.782595606543999	0.0577630112324218	45	1	0	0	0	0	0	0	0	0	4.42	6.18	A	17.7886666666667	4.43051320783602	14.4003333333333	4.42658872428677	0.00382488931293358
Lcl-038	nsr+ nis-	Lactococcus	lactis	lactis	15	LA	1.98	0.27	5.689	16.881	11.19	3.46277777777778	14.4886666666667	11.1003333333333	0.782595606543999	0.0577630112324218	45	1	0	0	0	0	0	0	0	0	4.42	6.18	A	17.8883333333333	6.17713103700893	14.5	6.13062918408303	0.864022008151865
Lcl-038	nsr+ nis-	Lactococcus	lactis	lactis	15	LA	1.98	0.27	5.689	16.881	11.19	3.46277777777778	14.4886666666667	11.1003333333333	0.782595606543999	0.0577630112324218	45	1	0	0	0	0	0	0	0	0	4.42	6.18	A	17.8883333333333	4.42714858058604	14.5	4.42322409703678	0.00212643042378849
Lcl-050	nsr+ nis-	Lactococcus	lactis	lactis	2	MDA	2.01	1.97	5.281	7.906	2.62	3.34416666666667	5.68833333333333	2.5	0.104924632544633		25	1	0	0	0	0	0	0	0	0	4.38	4.46	A	0.188333333333333	6.38265285861483	-3	6.34908019938669	0.974696754831147
Lcl-050	nsr+ nis-	Lactococcus	lactis	lactis	2	MDA	2.01	1.97	5.281	7.906	2.62	3.34416666666667	5.68833333333333	2.5	0.104924632544633		25	1	0	0	0	0	0	0	0	0	4.38	4.46	A	0.188333333333333	6.35145768679667	-3	6.3601970223566	0.980220965329192
Lcl-050	nsr+ nis-	Lactococcus	lactis	lactis	2	MDA	2.01	1.97	5.281	7.906	2.62	3.34416666666667	5.68833333333333	2.5	0.104924632544633		25	1	0	0	0	0	0	0	0	0	4.38	4.46	A	0.288333333333333	6.39261251881333	-2.9	6.35903985958519	0.979645943963188
Lcl-050	nsr+ nis-	Lactococcus	lactis	lactis	2	MDA	2.01	1.97	5.281	7.906	2.62	3.34416666666667	5.68833333333333	2.5	0.104924632544633		25	1	0	0	0	0	0	0	0	0	4.38	4.46	A	0.288333333333333	6.35387408137697	-2.9	6.3626134169369	0.98142172856380006
Lcl-050	nsr+ nis-	Lactococcus	lactis	lactis	2	MDA	2.01	1.97	5.281	7.906	2.62	3.34416666666667	5.68833333333333	2.5	0.104924632544633		25	1	0	0	0	0	0	0	0	0	4.38	4.46	A	0.388333333333333	6.39853894605765	-2.8	6.36496628682951	0.982590924888726
Lcl-050	nsr+ nis-	Lactococcus	lactis	lactis	2	MDA	2.01	1.97	5.281	7.906	2.62	3.34416666666667	5.68833333333333	2.5	0.104924632544633		25	1	0	0	0	0	0	0	0	0	4.38	4.46	A	0.388333333333333	6.36302691082411	-2.8	6.37176624638405	0.985969984540851
Lcl-050	nsr+ nis-	Lactococcus	lactis	lactis	2	MDA	2.01	1.97	5.281	7.906	2.62	3.34416666666667	5.68833333333333	2.5	0.104924632544633		25	1	0	0	0	0	0	0	0	0	4.38	4.46	A	0.488833333333333	6.41255119872085	-2.6995	6.37897853949271	0.989553942422855
Lcl-050	nsr+ nis-	Lactococcus	lactis	lactis	2	MDA	2.01	1.97	5.281	7.906	2.62	3.34416666666667	5.68833333333333	2.5	0.104924632544633		25	1	0	0	0	0	0	0	0	0	4.38	4.46	A	0.488833333333333	6.3719013107389	-2.6995	6.38064064629884	0.990379882342213
Lcl-050	nsr+ nis-	Lactococcus	lactis	lactis	2	MDA	2.01	1.97	5.281	7.906	2.62	3.34416666666667	5.68833333333333	2.5	0.104924632544633		25	1	0	0	0	0	0	0	0	0	4.38	4.46	A	0.588833333333333	6.41039913590576	-2.5995	6.37682647667762	0.988484531852252
Lcl-050	nsr+ nis-	Lactococcus	lactis	lactis	2	MDA	2.01	1.97	5.281	7.906	2.62	3.34416666666667	5.68833333333333	2.5	0.104924632544633		25	1	0	0	0	0	0	0	0	0	4.38	4.46	A	0.588833333333333	6.37835198492223	-2.5995	6.38709132048217	0.993585373887729
Lcl-050	nsr+ nis-	Lactococcus	lactis	lactis	2	MDA	2.01	1.97	5.281	7.906	2.62	3.34416666666667	5.68833333333333	2.5	0.104924632544633		25	1	0	0	0	0	0	0	0	0	4.38	4.46	A	0.688666666666667	6.41632832904853	-2.49966666666667	6.3827556698204	0.991430887217711
Lcl-050	nsr+ nis-	Lactococcus	lactis	lactis	2	MDA	2.01	1.97	5.281	7.906	2.62	3.34416666666667	5.68833333333333	2.5	0.104924632544633		25	1	0	0	0	0	0	0	0	0	4.38	4.46	A	0.688666666666667	6.38480265910557	-2.49966666666667	6.39354199466551	0.996790865433246
Lcl-050	nsr+ nis-	Lactococcus	lactis	lactis	2	MDA	2.01	1.97	5.281	7.906	2.62	3.34416666666667	5.68833333333333	2.5	0.104924632544633		25	1	0	0	0	0	0	0	0	0	4.38	4.46	A	0.788333333333333	6.41632832904853	-2.4	6.3827556698204	0.991430887217711
Lcl-050	nsr+ nis-	Lactococcus	lactis	lactis	2	MDA	2.01	1.97	5.281	7.906	2.62	3.34416666666667	5.68833333333333	2.5	0.104924632544633		25	1	0	0	0	0	0	0	0	0	4.38	4.46	A	0.788333333333333	6.39126066444006	-2.4	6.4	1
Lcl-050	nsr+ nis-	Lactococcus	lactis	lactis	2	MDA	2.01	1.97	5.281	7.906	2.62	3.34416666666667	5.68833333333333	2.5	0.104924632544633		25	1	0	0	0	0	0	0	0	0	4.38	4.46	A	0.888333333333333	6.41875455285075	-2.3	6.38518189362261	0.992636534823601
Lcl-050	nsr+ nis-	Lactococcus	lactis	lactis	2	MDA	2.01	1.97	5.281	7.906	2.62	3.34416666666667	5.68833333333333	2.5	0.104924632544633		25	1	0	0	0	0	0	0	0	0	4.38	4.46	A	0.888333333333333	6.38614211459595	-2.3	6.39488145015589	0.997456472333857
Lcl-050	nsr+ nis-	Lactococcus	lactis	lactis	2	MDA	2.01	1.97	5.281	7.906	2.62	3.34416666666667	5.68833333333333	2.5	0.104924632544633		25	1	0	0	0	0	0	0	0	0	4.38	4.46	A	0.988333333333333	6.41632969082706	-2.2	6.38275703159893	0.991431563917452
Lcl-050	nsr+ nis-	Lactococcus	lactis	lactis	2	MDA	2.01	1.97	5.281	7.906	2.62	3.34416666666667	5.68833333333333	2.5	0.104924632544633		25	1	0	0	0	0	0	0	0	0	4.38	4.46	A	0.988333333333333	6.37726771468116	-2.2	6.3860070502411	0.993046574532495
Lcl-050	nsr+ nis-	Lactococcus	lactis	lactis	2	MDA	2.01	1.97	5.281	7.906	2.62	3.34416666666667	5.68833333333333	2.5	0.104924632544633		25	1	0	0	0	0	0	0	0	0	4.38	4.46	A	1.08833333333333	6.43006914428166	-2.1	6.39649648505352	0.998259021116036
Lcl-050	nsr+ nis-	Lactococcus	lactis	lactis	2	MDA	2.01	1.97	5.281	7.906	2.62	3.34416666666667	5.68833333333333	2.5	0.104924632544633		25	1	0	0	0	0	0	0	0	0	4.38	4.46	A	1.08833333333333	6.37969144041262	-2.1	6.38843077597256	0.994250980788341
Lcl-050	nsr+ nis-	Lactococcus	lactis	lactis	2	MDA	2.01	1.97	5.281	7.906	2.62	3.34416666666667	5.68833333333333	2.5	0.104924632544633		25	1	0	0	0	0	0	0	0	0	4.38	4.46	A	1.18866666666667	6.41982723219259	-1.99966666666667	6.38625457296445	0.993169574388707
Lcl-050	nsr+ nis-	Lactococcus	lactis	lactis	2	MDA	2.01	1.97	5.281	7.906	2.62	3.34416666666667	5.68833333333333	2.5	0.104924632544633		25	1	0	0	0	0	0	0	0	0	4.38	4.46	A	1.18866666666667	6.37726994145304	-1.99966666666667	6.38600927701298	0.993047681067754
Lcl-050	nsr+ nis-	Lactococcus	lactis	lactis	2	MDA	2.01	1.97	5.281	7.906	2.62	3.34416666666667	5.68833333333333	2.5	0.104924632544633		25	1	0	0	0	0	0	0	0	0	4.38	4.46	A	1.28833333333333	6.42333180467035	-1.9	6.38975914544221	0.994911078784809
Lcl-050	nsr+ nis-	Lactococcus	lactis	lactis	2	MDA	2.01	1.97	5.281	7.906	2.62	3.34416666666667	5.68833333333333	2.5	0.104924632544633		25	1	0	0	0	0	0	0	0	0	4.38	4.46	A	1.28833333333333	6.37484621572159	-1.9	6.38358555128152	0.991843274811908
Lcl-050	nsr+ nis-	Lactococcus	lactis	lactis	2	MDA	2.01	1.97	5.281	7.906	2.62	3.34416666666667	5.68833333333333	2.5	0.104924632544633		25	1	0	0	0	0	0	0	0	0	4.38	4.46	A	1.38833333333333	6.42090558086813	-1.8	6.38733292164	0.993705431178919
Lcl-050	nsr+ nis-	Lactococcus	lactis	lactis	2	MDA	2.01	1.97	5.281	7.906	2.62	3.34416666666667	5.68833333333333	2.5	0.104924632544633		25	1	0	0	0	0	0	0	0	0	4.38	4.46	A	1.38833333333333	6.37081193611855	-1.8	6.37955127167849	0.989838546501
Lcl-050	nsr+ nis-	Lactococcus	lactis	lactis	2	MDA	2.01	1.97	5.281	7.906	2.62	3.34416666666667	5.68833333333333	2.5	0.104924632544633		25	1	0	0	0	0	0	0	0	0	4.38	4.46	A	1.48833333333333	6.41308853080275	-1.7	6.37951587157461	0.989820955357739
Lcl-050	nsr+ nis-	Lactococcus	lactis	lactis	2	MDA	2.01	1.97	5.281	7.906	2.62	3.34416666666667	5.68833333333333	2.5	0.104924632544633		25	1	0	0	0	0	0	0	0	0	4.38	4.46	A	1.48833333333333	6.37081193611855	-1.7	6.37955127167849	0.989838546501
Lcl-050	nsr+ nis-	Lactococcus	lactis	lactis	2	MDA	2.01	1.97	5.281	7.906	2.62	3.34416666666667	5.68833333333333	2.5	0.104924632544633		25	1	0	0	0	0	0	0	0	0	4.38	4.46	A	1.58866666666667	6.41551339282643	-1.59966666666667	6.3819407335983	0.991025926263888
Lcl-050	nsr+ nis-	Lactococcus	lactis	lactis	2	MDA	2.01	1.97	5.281	7.906	2.62	3.34416666666667	5.68833333333333	2.5	0.104924632544633		25	1	0	0	0	0	0	0	0	0	4.38	4.46	A	1.58866666666667	6.36193753620376	-1.59966666666667	6.3706768717637	0.985428648699638
Lcl-050	nsr+ nis-	Lactococcus	lactis	lactis	2	MDA	2.01	1.97	5.281	7.906	2.62	3.34416666666667	5.68833333333333	2.5	0.104924632544633		25	1	0	0	0	0	0	0	0	0	4.38	4.46	A	1.68883333333333	6.42333044289182	-1.4995	6.38975778366368	0.994910402085068
Lcl-050	nsr+ nis-	Lactococcus	lactis	lactis	2	MDA	2.01	1.97	5.281	7.906	2.62	3.34416666666667	5.68833333333333	2.5	0.104924632544633		25	1	0	0	0	0	0	0	0	0	4.38	4.46	A	1.68883333333333	6.35790836098	-1.4995	6.36664769653994	0.983426456874708
Lcl-050	nsr+ nis-	Lactococcus	lactis	lactis	2	MDA	2.01	1.97	5.281	7.906	2.62	3.34416666666667	5.68833333333333	2.5	0.104924632544633		25	1	0	0	0	0	0	0	0	0	4.38	4.46	A	1.78833333333333	6.41766978374387	-1.4	6.38409712451573	0.992097487570229
Lcl-050	nsr+ nis-	Lactococcus	lactis	lactis	2	MDA	2.01	1.97	5.281	7.906	2.62	3.34416666666667	5.68833333333333	2.5	0.104924632544633		25	1	0	0	0	0	0	0	0	0	4.38	4.46	A	1.78833333333333	6.35387408137697	-1.4	6.3626134169369	0.98142172856380006
Lcl-050	nsr+ nis-	Lactococcus	lactis	lactis	2	MDA	2.01	1.97	5.281	7.906	2.62	3.34416666666667	5.68833333333333	2.5	0.104924632544633		25	1	0	0	0	0	0	0	0	0	4.38	4.46	A	1.88866666666667	6.42333074713906	-1.29966666666667	6.38975808791093	0.994910553272671
Lcl-050	nsr+ nis-	Lactococcus	lactis	lactis	2	MDA	2.01	1.97	5.281	7.906	2.62	3.34416666666667	5.68833333333333	2.5	0.104924632544633		25	1	0	0	0	0	0	0	0	0	4.38	4.46	A	1.88866666666667	6.35145768679667	-1.29966666666667	6.3601970223566	0.980220965329192
Lcl-050	nsr+ nis-	Lactococcus	lactis	lactis	2	MDA	2.01	1.97	5.281	7.906	2.62	3.34416666666667	5.68833333333333	2.5	0.104924632544633		25	1	0	0	0	0	0	0	0	0	4.38	4.46	A	1.98833333333333	6.43114779720445	-1.2	6.39757513797632	0.998795029093851
Lcl-050	nsr+ nis-	Lactococcus	lactis	lactis	2	MDA	2.01	1.97	5.281	7.906	2.62	3.34416666666667	5.68833333333333	2.5	0.104924632544633		25	1	0	0	0	0	0	0	0	0	4.38	4.46	A	1.98833333333333	6.35145768679667	-1.2	6.3601970223566	0.980220965329192
Lcl-050	nsr+ nis-	Lactococcus	lactis	lactis	2	MDA	2.01	1.97	5.281	7.906	2.62	3.34416666666667	5.68833333333333	2.5	0.104924632544633		25	1	0	0	0	0	0	0	0	0	4.38	4.46	A	2.08866666666667	6.43114779720445	-1.09966666666667	6.39757513797632	0.998795029093851
Lcl-050	nsr+ nis-	Lactococcus	lactis	lactis	2	MDA	2.01	1.97	5.281	7.906	2.62	3.34416666666667	5.68833333333333	2.5	0.104924632544633		25	1	0	0	0	0	0	0	0	0	4.38	4.46	A	2.08866666666667	6.35145768679667	-1.09966666666667	6.3601970223566	0.980220965329192
Lcl-050	nsr+ nis-	Lactococcus	lactis	lactis	2	MDA	2.01	1.97	5.281	7.906	2.62	3.34416666666667	5.68833333333333	2.5	0.104924632544633		25	1	0	0	0	0	0	0	0	0	4.38	4.46	A	2.18833333333333	6.42333074713906	-1	6.38975808791093	0.994910553272671
Lcl-050	nsr+ nis-	Lactococcus	lactis	lactis	2	MDA	2.01	1.97	5.281	7.906	2.62	3.34416666666667	5.68833333333333	2.5	0.104924632544633		25	1	0	0	0	0	0	0	0	0	4.38	4.46	A	2.18833333333333	6.35145768679667	-1	6.3601970223566	0.980220965329192
Lcl-050	nsr+ nis-	Lactococcus	lactis	lactis	2	MDA	2.01	1.97	5.281	7.906	2.62	3.34416666666667	5.68833333333333	2.5	0.104924632544633		25	1	0	0	0	0	0	0	0	0	4.38	4.46	A	2.28833333333333	6.43114779720445	-0.9	6.39757513797632	0.998795029093851
Lcl-050	nsr+ nis-	Lactococcus	lactis	lactis	2	MDA	2.01	1.97	5.281	7.906	2.62	3.34416666666667	5.68833333333333	2.5	0.104924632544633		25	1	0	0	0	0	0	0	0	0	4.38	4.46	A	2.28833333333333	6.35145768679667	-0.9	6.3601970223566	0.980220965329192
Lcl-050	nsr+ nis-	Lactococcus	lactis	lactis	2	MDA	2.01	1.97	5.281	7.906	2.62	3.34416666666667	5.68833333333333	2.5	0.104924632544633		25	1	0	0	0	0	0	0	0	0	4.38	4.46	A	2.38866666666667	6.43357265922814	-0.799666666666667	6.4	1
Lcl-050	nsr+ nis-	Lactococcus	lactis	lactis	2	MDA	2.01	1.97	5.281	7.906	2.62	3.34416666666667	5.68833333333333	2.5	0.104924632544633		25	1	0	0	0	0	0	0	0	0	4.38	4.46	A	2.38866666666667	6.34236813527405	-0.799666666666667	6.35110747083399	0.975704153639408
Lcl-050	nsr+ nis-	Lactococcus	lactis	lactis	2	MDA	2.01	1.97	5.281	7.906	2.62	3.34416666666667	5.68833333333333	2.5	0.104924632544633		25	1	0	0	0	0	0	0	0	0	4.38	4.46	A	2.48833333333333	6.42575560916275	-0.7	6.39218294993461	0.99611552417882
Lcl-050	nsr+ nis-	Lactococcus	lactis	lactis	2	MDA	2.01	1.97	5.281	7.906	2.62	3.34416666666667	5.68833333333333	2.5	0.104924632544633		25	1	0	0	0	0	0	0	0	0	4.38	4.46	A	2.48833333333333	6.33567774103276	-0.7	6.3444170765927	0.972379539565421
Lcl-050	nsr+ nis-	Lactococcus	lactis	lactis	2	MDA	2.01	1.97	5.281	7.906	2.62	3.34416666666667	5.68833333333333	2.5	0.104924632544633		25	1	0	0	0	0	0	0	0	0	4.38	4.46	A	2.58866666666667	6.42575560916275	-0.599666666666667	6.39218294993461	0.99611552417882
Lcl-050	nsr+ nis-	Lactococcus	lactis	lactis	2	MDA	2.01	1.97	5.281	7.906	2.62	3.34416666666667	5.68833333333333	2.5	0.104924632544633		25	1	0	0	0	0	0	0	0	0	4.38	4.46	A	2.58866666666667	6.3218073769349	-0.599666666666667	6.33054671249484	0.965487029792756
Lcl-050	nsr+ nis-	Lactococcus	lactis	lactis	2	MDA	2.01	1.97	5.281	7.906	2.62	3.34416666666667	5.68833333333333	2.5	0.104924632544633		25	1	0	0	0	0	0	0	0	0	4.38	4.46	A	2.68833333333333	6.43357265922814	-0.5	6.4	1
Lcl-050	nsr+ nis-	Lactococcus	lactis	lactis	2	MDA	2.01	1.97	5.281	7.906	2.62	3.34416666666667	5.68833333333333	2.5	0.104924632544633		25	1	0	0	0	0	0	0	0	0	4.38	4.46	A	2.68833333333333	6.30793701283705	-0.5	6.31667634839698	0.958594520020091
Lcl-050	nsr+ nis-	Lactococcus	lactis	lactis	2	MDA	2.01	1.97	5.281	7.906	2.62	3.34416666666667	5.68833333333333	2.5	0.104924632544633		25	1	0	0	0	0	0	0	0	0	4.38	4.46	A	2.78833333333333	6.42791169583294	-0.4	6.39433903660481	0.997186934297557
Lcl-050	nsr+ nis-	Lactococcus	lactis	lactis	2	MDA	2.01	1.97	5.281	7.906	2.62	3.34416666666667	5.68833333333333	2.5	0.104924632544633		25	1	0	0	0	0	0	0	0	0	4.38	4.46	A	2.78833333333333	6.28452837083193	-0.4	6.29326770639187	0.946962215875314
Lcl-050	nsr+ nis-	Lactococcus	lactis	lactis	2	MDA	2.01	1.97	5.281	7.906	2.62	3.34416666666667	5.68833333333333	2.5	0.104924632544633		25	1	0	0	0	0	0	0	0	0	4.38	4.46	A	2.88833333333333	6.41982587041406	-0.3	6.38625321118593	0.993168897688965
Lcl-050	nsr+ nis-	Lactococcus	lactis	lactis	2	MDA	2.01	1.97	5.281	7.906	2.62	3.34416666666667	5.68833333333333	2.5	0.104924632544633		25	1	0	0	0	0	0	0	0	0	4.38	4.46	A	2.88833333333333	6.2726256749297304	-0.3	6.28136501048967	0.941047486654928
Lcl-050	nsr+ nis-	Lactococcus	lactis	lactis	2	MDA	2.01	1.97	5.281	7.906	2.62	3.34416666666667	5.68833333333333	2.5	0.104924632544633		25	1	0	0	0	0	0	0	0	0	4.38	4.46	A	2.98866666666667	6.43006778250313	-0.199666666666667	6.396495123275	0.998258344416294
Lcl-050	nsr+ nis-	Lactococcus	lactis	lactis	2	MDA	2.01	1.97	5.281	7.906	2.62	3.34416666666667	5.68833333333333	2.5	0.104924632544633		25	1	0	0	0	0	0	0	0	0	4.38	4.46	A	2.98866666666667	6.2583238217462	-0.199666666666667	6.26706315730614	0.933940559818746
Lcl-050	nsr+ nis-	Lactococcus	lactis	lactis	2	MDA	2.01	1.97	5.281	7.906	2.62	3.34416666666667	5.68833333333333	2.5	0.104924632544633		25	1	0	0	0	0	0	0	0	0	4.38	4.46	A	3.08866666666667	6.43006778250313	-0.0996666666666668	6.396495123275	0.998258344416294
Lcl-050	nsr+ nis-	Lactococcus	lactis	lactis	2	MDA	2.01	1.97	5.281	7.906	2.62	3.34416666666667	5.68833333333333	2.5	0.104924632544633		25	1	0	0	0	0	0	0	0	0	4.38	4.46	A	3.08866666666667	6.23485047265488	-0.0996666666666668	6.24358980821482	0.922276101202691
Lcl-050	nsr+ nis-	Lactococcus	lactis	lactis	2	MDA	2.01	1.97	5.281	7.906	2.62	3.34416666666667	5.68833333333333	2.5	0.104924632544633		25	1	0	0	0	0	0	0	0	0	4.38	4.46	A	3.18833333333333	6.43249264452682	0	6.39891998529868	0.999463315322443
Lcl-050	nsr+ nis-	Lactococcus	lactis	lactis	2	MDA	2.01	1.97	5.281	7.906	2.62	3.34416666666667	5.68833333333333	2.5	0.104924632544633		25	1	0	0	0	0	0	0	0	0	4.38	4.46	A	3.18833333333333	6.21291731216343	0	6.22165664772337	0.911376998485116
Lcl-050	nsr+ nis-	Lactococcus	lactis	lactis	2	MDA	2.01	1.97	5.281	7.906	2.62	3.34416666666667	5.68833333333333	2.5	0.104924632544633		25	1	0	0	0	0	0	0	0	0	4.38	4.46	A	3.28833333333333	6.43249264452682	0.1	6.39891998529868	0.999463315322443
Lcl-050	nsr+ nis-	Lactococcus	lactis	lactis	2	MDA	2.01	1.97	5.281	7.906	2.62	3.34416666666667	5.68833333333333	2.5	0.104924632544633		25	1	0	0	0	0	0	0	0	0	4.38	4.46	A	3.28833333333333	6.19810603499895	0.1	6.20684537055889	0.904016926905046
Lcl-050	nsr+ nis-	Lactococcus	lactis	lactis	2	MDA	2.01	1.97	5.281	7.906	2.62	3.34416666666667	5.68833333333333	2.5	0.104924632544633		25	1	0	0	0	0	0	0	0	0	4.38	4.46	A	3.38833333333333	6.43033655785663	0.2	6.39676389862849	0.998391905203706
Lcl-050	nsr+ nis-	Lactococcus	lactis	lactis	2	MDA	2.01	1.97	5.281	7.906	2.62	3.34416666666667	5.68833333333333	2.5	0.104924632544633		25	1	0	0	0	0	0	0	0	0	4.38	4.46	A	3.38833333333333	6.17436192558545	0.2	6.18310126114539	0.892217921124006
Lcl-050	nsr+ nis-	Lactococcus	lactis	lactis	2	MDA	2.01	1.97	5.281	7.906	2.62	3.34416666666667	5.68833333333333	2.5	0.104924632544633		25	1	0	0	0	0	0	0	0	0	4.38	4.46	A	3.48833333333333	6.43033655785663	0.3	6.39676389862849	0.998391905203706
Lcl-050	nsr+ nis-	Lactococcus	lactis	lactis	2	MDA	2.01	1.97	5.281	7.906	2.62	3.34416666666667	5.68833333333333	2.5	0.104924632544633		25	1	0	0	0	0	0	0	0	0	4.38	4.46	A	3.48833333333333	6.14431211014767	0.3	6.15305144570761	0.877285461881378
Lcl-050	nsr+ nis-	Lactococcus	lactis	lactis	2	MDA	2.01	1.97	5.281	7.906	2.62	3.34416666666667	5.68833333333333	2.5	0.104924632544633		25	1	0	0	0	0	0	0	0	0	4.38	4.46	A	3.58833333333333	6.41659345409234	0.4	6.38302079486421	0.991562634080486
Lcl-050	nsr+ nis-	Lactococcus	lactis	lactis	2	MDA	2.01	1.97	5.281	7.906	2.62	3.34416666666667	5.68833333333333	2.5	0.104924632544633		25	1	0	0	0	0	0	0	0	0	4.38	4.46	A	3.58833333333333	6.12188326368154	0.4	6.13062259924147	0.866140041157973
Lcl-050	nsr+ nis-	Lactococcus	lactis	lactis	2	MDA	2.01	1.97	5.281	7.906	2.62	3.34416666666667	5.68833333333333	2.5	0.104924632544633		25	1	0	0	0	0	0	0	0	0	4.38	4.46	A	3.68833333333333	6.41659345409234	0.5	6.38302079486421	0.991562634080486
Lcl-050	nsr+ nis-	Lactococcus	lactis	lactis	2	MDA	2.01	1.97	5.281	7.906	2.62	3.34416666666667	5.68833333333333	2.5	0.104924632544633		25	1	0	0	0	0	0	0	0	0	4.38	4.46	A	3.68833333333333	6.08291919778971	0.5	6.09165853334965	0.84677788144483
Lcl-050	nsr+ nis-	Lactococcus	lactis	lactis	2	MDA	2.01	1.97	5.281	7.906	2.62	3.34416666666667	5.68833333333333	2.5	0.104924632544633		25	1	0	0	0	0	0	0	0	0	4.38	4.46	A	3.78833333333333	6.41901967789456	0.6	6.38544701866642	0.992768281686376
Lcl-050	nsr+ nis-	Lactococcus	lactis	lactis	2	MDA	2.01	1.97	5.281	7.906	2.62	3.34416666666667	5.68833333333333	2.5	0.104924632544633		25	1	0	0	0	0	0	0	0	0	4.38	4.46	A	3.78833333333333	6.04468761646854	0.6	6.05342695202848	0.827779710522897
Lcl-050	nsr+ nis-	Lactococcus	lactis	lactis	2	MDA	2.01	1.97	5.281	7.906	2.62	3.34416666666667	5.68833333333333	2.5	0.104924632544633		25	1	0	0	0	0	0	0	0	0	4.38	4.46	A	3.88833333333333	6.41767262487433	0.7	6.38409996564619	0.992098899394701
Lcl-050	nsr+ nis-	Lactococcus	lactis	lactis	2	MDA	2.01	1.97	5.281	7.906	2.62	3.34416666666667	5.68833333333333	2.5	0.104924632544633		25	1	0	0	0	0	0	0	0	0	4.38	4.46	A	3.88833333333333	6.00734845292023	0.7	6.01608778848016	0.809225002957602
Lcl-050	nsr+ nis-	Lactococcus	lactis	lactis	2	MDA	2.01	1.97	5.281	7.906	2.62	3.34416666666667	5.68833333333333	2.5	0.104924632544633		25	1	0	0	0	0	0	0	0	0	4.38	4.46	A	3.98833333333333	6.41201302325766	0.8	6.37844036402953	0.989286510391999
Lcl-050	nsr+ nis-	Lactococcus	lactis	lactis	2	MDA	2.01	1.97	5.281	7.906	2.62	3.34416666666667	5.68833333333333	2.5	0.104924632544633		25	1	0	0	0	0	0	0	0	0	4.38	4.46	A	3.98833333333333	5.96171088518622	0.8	5.97045022074616	0.786546623400438
Lcl-050	nsr+ nis-	Lactococcus	lactis	lactis	2	MDA	2.01	1.97	5.281	7.906	2.62	3.34416666666667	5.68833333333333	2.5	0.104924632544633		25	1	0	0	0	0	0	0	0	0	4.38	4.46	A	4.08833333333333	6.41201302325766	0.9	6.37844036402953	0.989286510391999
Lcl-050	nsr+ nis-	Lactococcus	lactis	lactis	2	MDA	2.01	1.97	5.281	7.906	2.62	3.34416666666667	5.68833333333333	2.5	0.104924632544633		25	1	0	0	0	0	0	0	0	0	4.38	4.46	A	4.08833333333333	5.92480381424493	0.9	5.93354314980487	0.768206632802602
Lcl-050	nsr+ nis-	Lactococcus	lactis	lactis	2	MDA	2.01	1.97	5.281	7.906	2.62	3.34416666666667	5.68833333333333	2.5	0.104924632544633		25	1	0	0	0	0	0	0	0	0	4.38	4.46	A	4.18866666666667	6.40042405814837	1.00033333333333	6.36685139892023	0.983527681372995
Lcl-050	nsr+ nis-	Lactococcus	lactis	lactis	2	MDA	2.01	1.97	5.281	7.906	2.62	3.34416666666667	5.68833333333333	2.5	0.104924632544633		25	1	0	0	0	0	0	0	0	0	4.38	4.46	A	4.18866666666667	5.88784316399303	1.00033333333333	5.89658249955297	0.749840017386601
Lcl-050	nsr+ nis-	Lactococcus	lactis	lactis	2	MDA	2.01	1.97	5.281	7.906	2.62	3.34416666666667	5.68833333333333	2.5	0.104924632544633		25	1	0	0	0	0	0	0	0	0	4.38	4.46	A	4.28866666666667	6.39234055600075	1.10033333333333	6.35876789677262	0.979510799252476
Lcl-050	nsr+ nis-	Lactococcus	lactis	lactis	2	MDA	2.01	1.97	5.281	7.906	2.62	3.34416666666667	5.68833333333333	2.5	0.104924632544633		25	1	0	0	0	0	0	0	0	0	4.38	4.46	A	4.28866666666667	5.83665748946304	1.10033333333333	5.84539682502298	0.724404653222449
Lcl-050	nsr+ nis-	Lactococcus	lactis	lactis	2	MDA	2.01	1.97	5.281	7.906	2.62	3.34416666666667	5.68833333333333	2.5	0.104924632544633		25	1	0	0	0	0	0	0	0	0	4.38	4.46	A	4.38866666666667	6.39234055600075	1.20033333333333	6.35876789677262	0.979510799252476
Lcl-050	nsr+ nis-	Lactococcus	lactis	lactis	2	MDA	2.01	1.97	5.281	7.906	2.62	3.34416666666667	5.68833333333333	2.5	0.104924632544633		25	1	0	0	0	0	0	0	0	0	4.38	4.46	A	4.38866666666667	5.7866692475569	1.20033333333333	5.79540858311684	0.699564321460023
Lcl-050	nsr+ nis-	Lactococcus	lactis	lactis	2	MDA	2.01	1.97	5.281	7.906	2.62	3.34416666666667	5.68833333333333	2.5	0.104924632544633		25	1	0	0	0	0	0	0	0	0	4.38	4.46	A	4.48833333333333	6.38641119250812	1.3	6.35283853327999	0.976564359236172
Lcl-050	nsr+ nis-	Lactococcus	lactis	lactis	2	MDA	2.01	1.97	5.281	7.906	2.62	3.34416666666667	5.68833333333333	2.5	0.104924632544633		25	1	0	0	0	0	0	0	0	0	4.38	4.46	A	4.48833333333333	5.73062452318364	1.3	5.73936385874357	0.671714381276502
Lcl-050	nsr+ nis-	Lactococcus	lactis	lactis	2	MDA	2.01	1.97	5.281	7.906	2.62	3.34416666666667	5.68833333333333	2.5	0.104924632544633		25	1	0	0	0	0	0	0	0	0	4.38	4.46	A	4.58833333333333	6.38856533116311	1.4	6.35499267193497	0.977634801340388
Lcl-050	nsr+ nis-	Lactococcus	lactis	lactis	2	MDA	2.01	1.97	5.281	7.906	2.62	3.34416666666667	5.68833333333333	2.5	0.104924632544633		25	1	0	0	0	0	0	0	0	0	4.38	4.46	A	4.58833333333333	5.67280901574449	1.4	5.68154835130443	0.64298449738705
Lcl-050	nsr+ nis-	Lactococcus	lactis	lactis	2	MDA	2.01	1.97	5.281	7.906	2.62	3.34416666666667	5.68833333333333	2.5	0.104924632544633		25	1	0	0	0	0	0	0	0	0	4.38	4.46	A	4.68866666666667	6.38022969564276	1.50033333333333	6.34665703641463	0.973492628223662
Lcl-050	nsr+ nis-	Lactococcus	lactis	lactis	2	MDA	2.01	1.97	5.281	7.906	2.62	3.34416666666667	5.68833333333333	2.5	0.104924632544633		25	1	0	0	0	0	0	0	0	0	4.38	4.46	A	4.68866666666667	5.61618860354696	1.50033333333333	5.6249279391069	0.614848484399181
Lcl-050	nsr+ nis-	Lactococcus	lactis	lactis	2	MDA	2.01	1.97	5.281	7.906	2.62	3.34416666666667	5.68833333333333	2.5	0.104924632544633		25	1	0	0	0	0	0	0	0	0	4.38	4.46	A	4.7883333333333304	6.36762471042358	1.6	6.33405205119545	0.96722891494299
Lcl-050	nsr+ nis-	Lactococcus	lactis	lactis	2	MDA	2.01	1.97	5.281	7.906	2.62	3.34416666666667	5.68833333333333	2.5	0.104924632544633		25	1	0	0	0	0	0	0	0	0	4.38	4.46	A	4.7883333333333304	5.55941610759989	1.6	5.56815544315983	0.586636897423308
Lcl-050	nsr+ nis-	Lactococcus	lactis	lactis	2	MDA	2.01	1.97	5.281	7.906	2.62	3.34416666666667	5.68833333333333	2.5	0.104924632544633		25	1	0	0	0	0	0	0	0	0	4.38	4.46	A	4.88833333333333	6.35286558654941	1.7	6.31929292732128	0.959894759558103
Lcl-050	nsr+ nis-	Lactococcus	lactis	lactis	2	MDA	2.01	1.97	5.281	7.906	2.62	3.34416666666667	5.68833333333333	2.5	0.104924632544633		25	1	0	0	0	0	0	0	0	0	4.38	4.46	A	4.88833333333333	5.49616976471127	1.7	5.50490910027121	0.555208303813969
Lcl-050	nsr+ nis-	Lactococcus	lactis	lactis	2	MDA	2.01	1.97	5.281	7.906	2.62	3.34416666666667	5.68833333333333	2.5	0.104924632544633		25	1	0	0	0	0	0	0	0	0	4.38	4.46	A	4.98833333333333	6.33810646267525	1.8	6.30453380344711	0.952560604173215
Lcl-050	nsr+ nis-	Lactococcus	lactis	lactis	2	MDA	2.01	1.97	5.281	7.906	2.62	3.34416666666667	5.68833333333333	2.5	0.104924632544633		25	1	0	0	0	0	0	0	0	0	4.38	4.46	A	4.98833333333333	5.45018289386591	1.8	5.45892222942585	0.532356347334699
Lcl-050	nsr+ nis-	Lactococcus	lactis	lactis	2	MDA	2.01	1.97	5.281	7.906	2.62	3.34416666666667	5.68833333333333	2.5	0.104924632544633		25	1	0	0	0	0	0	0	0	0	4.38	4.46	A	5.08866666666667	6.32548484580288	1.90033333333333	6.29191218657474	0.946288626233349
Lcl-050	nsr+ nis-	Lactococcus	lactis	lactis	2	MDA	2.01	1.97	5.281	7.906	2.62	3.34416666666667	5.68833333333333	2.5	0.104924632544633		25	1	0	0	0	0	0	0	0	0	4.38	4.46	A	5.08866666666667	5.40249770311976	1.90033333333333	5.41123703867969	0.508660455798583
Lcl-050	nsr+ nis-	Lactococcus	lactis	lactis	2	MDA	2.01	1.97	5.281	7.906	2.62	3.34416666666667	5.68833333333333	2.5	0.104924632544633		25	1	0	0	0	0	0	0	0	0	4.38	4.46	A	5.18833333333333	6.31267474930882	2	6.27910209008069	0.939922988341574
Lcl-050	nsr+ nis-	Lactococcus	lactis	lactis	2	MDA	2.01	1.97	5.281	7.906	2.62	3.34416666666667	5.68833333333333	2.5	0.104924632544633		25	1	0	0	0	0	0	0	0	0	4.38	4.46	A	5.18833333333333	5.36552341992263	2	5.37426275548257	0.490287065851826
Lcl-050	nsr+ nis-	Lactococcus	lactis	lactis	2	MDA	2.01	1.97	5.281	7.906	2.62	3.34416666666667	5.68833333333333	2.5	0.104924632544633		25	1	0	0	0	0	0	0	0	0	4.38	4.46	A	5.2883333333333304	6.30628814116859	2.1	6.27271548194045	0.936749332717961
Lcl-050	nsr+ nis-	Lactococcus	lactis	lactis	2	MDA	2.01	1.97	5.281	7.906	2.62	3.34416666666667	5.68833333333333	2.5	0.104924632544633		25	1	0	0	0	0	0	0	0	0	4.38	4.46	A	5.2883333333333304	5.34219376018247	2.1	5.35093309574241	0.478694009850014
Lcl-050	nsr+ nis-	Lactococcus	lactis	lactis	2	MDA	2.01	1.97	5.281	7.906	2.62	3.34416666666667	5.68833333333333	2.5	0.104924632544633		25	1	0	0	0	0	0	0	0	0	4.38	4.46	A	5.38833333333333	6.29329654144929	2.2	6.25972388222115	0.930293501609558
Lcl-050	nsr+ nis-	Lactococcus	lactis	lactis	2	MDA	2.01	1.97	5.281	7.906	2.62	3.34416666666667	5.68833333333333	2.5	0.104924632544633		25	1	0	0	0	0	0	0	0	0	4.38	4.46	A	5.38833333333333	5.32156346741671	2.2	5.33030280297665	0.468442332713224
Lcl-050	nsr+ nis-	Lactococcus	lactis	lactis	2	MDA	2.01	1.97	5.281	7.906	2.62	3.34416666666667	5.68833333333333	2.5	0.104924632544633		25	1	0	0	0	0	0	0	0	0	4.38	4.46	A	5.48916666666667	6.28030494172999	2.30083333333333	6.24673228250186	0.923837670501156
Lcl-050	nsr+ nis-	Lactococcus	lactis	lactis	2	MDA	2.01	1.97	5.281	7.906	2.62	3.34416666666667	5.68833333333333	2.5	0.104924632544633		25	1	0	0	0	0	0	0	0	0	4.38	4.46	A	5.48916666666667	5.30433429528476	2.30083333333333	5.3130736308447	0.459880752320918
Lcl-050	nsr+ nis-	Lactococcus	lactis	lactis	2	MDA	2.01	1.97	5.281	7.906	2.62	3.34416666666667	5.68833333333333	2.5	0.104924632544633		25	1	0	0	0	0	0	0	0	0	4.38	4.46	A	5.58833333333333	6.25836555930498	2.4	6.22479290007684	0.912935475958622
Lcl-050	nsr+ nis-	Lactococcus	lactis	lactis	2	MDA	2.01	1.97	5.281	7.906	2.62	3.34416666666667	5.68833333333333	2.5	0.104924632544633		25	1	0	0	0	0	0	0	0	0	4.38	4.46	A	5.58833333333333	5.27059499963498	2.4	5.27933433519491	0.443114903685056
Lcl-050	nsr+ nis-	Lactococcus	lactis	lactis	2	MDA	2.01	1.97	5.281	7.906	2.62	3.34416666666667	5.68833333333333	2.5	0.104924632544633		25	1	0	0	0	0	0	0	0	0	4.38	4.46	A	5.68833333333333	6.24651625192495	2.5	6.21294359269681	0.907047276749145
Lcl-050	nsr+ nis-	Lactococcus	lactis	lactis	2	MDA	2.01	1.97	5.281	7.906	2.62	3.34416666666667	5.68833333333333	2.5	0.104924632544633		25	1	0	0	0	0	0	0	0	0	4.38	4.46	A	5.68833333333333	5.22389746677068	2.5	5.23263680233062	0.419909802553198
Lcl-050	nsr+ nis-	Lactococcus	lactis	lactis	2	MDA	2.01	1.97	5.281	7.906	2.62	3.34416666666667	5.68833333333333	2.5	0.104924632544633		25	1	0	0	0	0	0	0	0	0	4.38	4.46	A	5.7883333333333304	6.21916848743887	2.6	6.18559582821073	0.893457530102914
Lcl-050	nsr+ nis-	Lactococcus	lactis	lactis	2	MDA	2.01	1.97	5.281	7.906	2.62	3.34416666666667	5.68833333333333	2.5	0.104924632544633		25	1	0	0	0	0	0	0	0	0	4.38	4.46	A	5.7883333333333304	5.1651723317105	2.6	5.17391166727044	0.390727903329234
Lcl-050	nsr+ nis-	Lactococcus	lactis	lactis	2	MDA	2.01	1.97	5.281	7.906	2.62	3.34416666666667	5.68833333333333	2.5	0.104924632544633		25	1	0	0	0	0	0	0	0	0	4.38	4.46	A	5.88833333333333	6.19970334429405	2.7	6.16613068506592	0.883784843185296
Lcl-050	nsr+ nis-	Lactococcus	lactis	lactis	2	MDA	2.01	1.97	5.281	7.906	2.62	3.34416666666667	5.68833333333333	2.5	0.104924632544633		25	1	0	0	0	0	0	0	0	0	4.38	4.46	A	5.88833333333333	5.0920189195918	2.7	5.10075825515174	0.354376254275569
Lcl-050	nsr+ nis-	Lactococcus	lactis	lactis	2	MDA	2.01	1.97	5.281	7.906	2.62	3.34416666666667	5.68833333333333	2.5	0.104924632544633		25	1	0	0	0	0	0	0	0	0	4.38	4.46	A	5.98866666666667	6.16457113465833	2.80033333333333	6.13099847543019	0.866326822866499
Lcl-050	nsr+ nis-	Lactococcus	lactis	lactis	2	MDA	2.01	1.97	5.281	7.906	2.62	3.34416666666667	5.68833333333333	2.5	0.104924632544633		25	1	0	0	0	0	0	0	0	0	4.38	4.46	A	5.98866666666667	5.01277215741975	2.80033333333333	5.02151149297969	0.314996676431087
Lcl-050	nsr+ nis-	Lactococcus	lactis	lactis	2	MDA	2.01	1.97	5.281	7.906	2.62	3.34416666666667	5.68833333333333	2.5	0.104924632544633		25	1	0	0	0	0	0	0	0	0	4.38	4.46	A	6.08866666666667	6.12929031206279	2.90033333333333	6.09571765283465	0.848794953276646
Lcl-050	nsr+ nis-	Lactococcus	lactis	lactis	2	MDA	2.01	1.97	5.281	7.906	2.62	3.34416666666667	5.68833333333333	2.5	0.104924632544633		25	1	0	0	0	0	0	0	0	0	4.38	4.46	A	6.08866666666667	4.9421368866817	2.90033333333333	4.95087622224164	0.27989635098743
Lcl-050	nsr+ nis-	Lactococcus	lactis	lactis	2	MDA	2.01	1.97	5.281	7.906	2.62	3.34416666666667	5.68833333333333	2.5	0.104924632544633		25	1	0	0	0	0	0	0	0	0	4.38	4.46	A	6.18833333333333	6.08603604462379	3	6.05246338539565	0.827300891626252
Lcl-050	nsr+ nis-	Lactococcus	lactis	lactis	2	MDA	2.01	1.97	5.281	7.906	2.62	3.34416666666667	5.68833333333333	2.5	0.104924632544633		25	1	0	0	0	0	0	0	0	0	4.38	4.46	A	6.18833333333333	4.87366175481319	3	4.88240109037313	0.245869449295562
Lcl-050	nsr+ nis-	Lactococcus	lactis	lactis	2	MDA	2.01	1.97	5.281	7.906	2.62	3.34416666666667	5.68833333333333	2.5	0.104924632544633		25	1	0	0	0	0	0	0	0	0	4.38	4.46	A	6.2883333333333304	6.04314557471187	3.1	6.00957291548374	0.805987609513657
Lcl-050	nsr+ nis-	Lactococcus	lactis	lactis	2	MDA	2.01	1.97	5.281	7.906	2.62	3.34416666666667	5.68833333333333	2.5	0.104924632544633		25	1	0	0	0	0	0	0	0	0	4.38	4.46	A	6.2883333333333304	4.80607853952939	3.1	4.81481787508932	0.212285761908172
Lcl-050	nsr+ nis-	Lactococcus	lactis	lactis	2	MDA	2.01	1.97	5.281	7.906	2.62	3.34416666666667	5.68833333333333	2.5	0.104924632544633		25	1	0	0	0	0	0	0	0	0	4.38	4.46	A	6.38883333333333	5.99241245143947	3.2005	5.95883979221133	0.780777128701052
Lcl-050	nsr+ nis-	Lactococcus	lactis	lactis	2	MDA	2.01	1.97	5.281	7.906	2.62	3.34416666666667	5.68833333333333	2.5	0.104924632544633		25	1	0	0	0	0	0	0	0	0	4.38	4.46	A	6.38883333333333	4.76211678684268	3.2005	4.77085612240262	0.190440134217448
Lcl-050	nsr+ nis-	Lactococcus	lactis	lactis	2	MDA	2.01	1.97	5.281	7.906	2.62	3.34416666666667	5.68833333333333	2.5	0.104924632544633		25	1	0	0	0	0	0	0	0	0	4.38	4.46	A	6.48866666666667	5.9502801185517	3.30033333333333	5.91670745932357	0.759840582686453
Lcl-050	nsr+ nis-	Lactococcus	lactis	lactis	2	MDA	2.01	1.97	5.281	7.906	2.62	3.34416666666667	5.68833333333333	2.5	0.104924632544633		25	1	0	0	0	0	0	0	0	0	4.38	4.46	A	6.48866666666667	4.72567266049022	3.30033333333333	4.73441199605016	0.172330191661624
Lcl-050	nsr+ nis-	Lactococcus	lactis	lactis	2	MDA	2.01	1.97	5.281	7.906	2.62	3.34416666666667	5.68833333333333	2.5	0.104924632544633		25	1	0	0	0	0	0	0	0	0	4.38	4.46	A	6.58833333333333	5.90155587375821	3.4	5.86798321453007	0.735628360784018
Lcl-050	nsr+ nis-	Lactococcus	lactis	lactis	2	MDA	2.01	1.97	5.281	7.906	2.62	3.34416666666667	5.68833333333333	2.5	0.104924632544633		25	1	0	0	0	0	0	0	0	0	4.38	4.46	A	6.58833333333333	4.69340150246892	3.4	4.70214083802886	0.156293895103888
Lcl-050	nsr+ nis-	Lactococcus	lactis	lactis	2	MDA	2.01	1.97	5.281	7.906	2.62	3.34416666666667	5.68833333333333	2.5	0.104924632544633		25	1	0	0	0	0	0	0	0	0	4.38	4.46	A	6.68833333333333	5.84580418196323	3.5	5.81223152273509	0.707924035372774
Lcl-050	nsr+ nis-	Lactococcus	lactis	lactis	2	MDA	2.01	1.97	5.281	7.906	2.62	3.34416666666667	5.68833333333333	2.5	0.104924632544633		25	1	0	0	0	0	0	0	0	0	4.38	4.46	A	6.68833333333333	4.67724882374255	3.5	4.68598815930249	0.148267249574562
Lcl-050	nsr+ nis-	Lactococcus	lactis	lactis	2	MDA	2.01	1.97	5.281	7.906	2.62	3.34416666666667	5.68833333333333	2.5	0.104924632544633		25	1	0	0	0	0	0	0	0	0	4.38	4.46	A	6.7883333333333304	5.79221227783669	3.6	5.75863961860855	0.681292959193243
Lcl-050	nsr+ nis-	Lactococcus	lactis	lactis	2	MDA	2.01	1.97	5.281	7.906	2.62	3.34416666666667	5.68833333333333	2.5	0.104924632544633		25	1	0	0	0	0	0	0	0	0	4.38	4.46	A	6.7883333333333304	4.65966750913031	3.6	4.66840684469025	0.139530681311018
Lcl-050	nsr+ nis-	Lactococcus	lactis	lactis	2	MDA	2.01	1.97	5.281	7.906	2.62	3.34416666666667	5.68833333333333	2.5	0.104924632544633		25	1	0	0	0	0	0	0	0	0	4.38	4.46	A	6.88833333333333	5.7323058870878	3.7	5.69873322785966	0.651524066266664
Lcl-050	nsr+ nis-	Lactococcus	lactis	lactis	2	MDA	2.01	1.97	5.281	7.906	2.62	3.34416666666667	5.68833333333333	2.5	0.104924632544633		25	1	0	0	0	0	0	0	0	0	4.38	4.46	A	6.88833333333333	4.64351047079897	3.7	4.65224980635891	0.131501869391558
[truncated: 232,916 more rows]
